# Supplementary material for: Metagenomic analysis of viruses associated with maize lethal necrosis in Kenya
Source: Springer Nature journal article supplement (doi:10.1186/s12985-018-0999-2), 2018-05-23

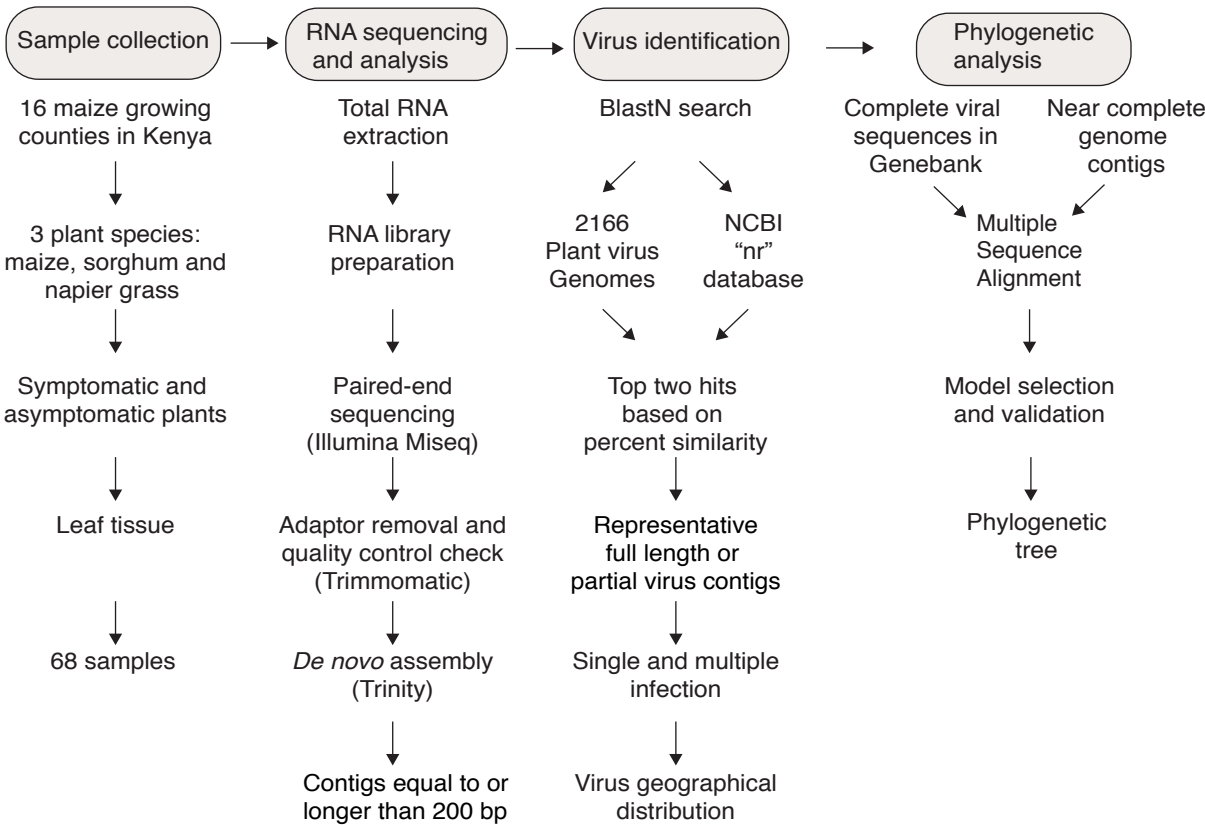

Supplement: MOESM1 [file 15786122]
