# Supplementary material for: Metagenomic analysis of viruses associated with maize lethal necrosis in Kenya
Source: Virol J. 2018 May 23;15:90. doi: 10.1186/s12985-018-0999-2 (PMC5966901; doi:10.1186/s12985-018-0999-2)
Supplement: Supplementary file 2 — Table S1. Description of samples used for identification of viruses associated to maize lethal necrosis in Kenya by a metagenomic analysis. (XLSX 1273 kb) [file 12985_2018_999_MOESM2_ESM.xlsx]

## Sheet: Run1
	Maize RNA sequencing analysis		11
			6
			11					Maize chlorotic mottle virus										Sugarcane mosaic virus									Maize streak virus
Researcher	Sample	Host	Total	Total	Unique_Contigs	Total	Contigs	Conting	Conting	Reference	Reference	%	Coordinates			Polarity	E	Contig	Conting	Reference	Reference	%	Coordinates		Polarity	E	Contig	Conting	Reference	Reference	%	Coordinates		Polarity	E
			Sequences	Contigs	matching to Virus	virus	Unmatch_to _PVGDB/NCBI		Length		Length	identity	Start	End			value		Length		Length	identity	Start	End		value		Length		Length	identity	Start	End		value
	1	Maize Leaf	1294075	53709	14	3	16779	DN4611_c0_g3_i1	1703	NC_003627.1	4437	96.183	1469	3171		Positive	0	DN4908_c1_g1_i1	6529	NC_003398.1	9596	79.713	7352	828	Negative	0	DN2163_c0_g1_i1	1843	NC_001346.2	2689	98.413	2689	2501	Negative	7.07e-91
	1		1					DN4611_c0_g2_i4	1480	NC_003627.1	4437	96.622	1493	14		Negative	0	DN4908_c0_g1_i1	3311	NC_003398.1	9596	87.795	8613	9580	Positive	0	DN2163_c0_g1_i1	1843	NC_001346.2	2689	98.308	1655	1	Negative	0
	1		1					DN4611_c0_g1_i1	1361	NC_003627.1	4437	97.235	4412	3147		Negative	0	DN4908_c0_g1_i2	2747	NC_003398.1	9596	86.607	8594	9041	Positive	1.27e-139	DN2163_c0_g1_i2	1599	NC_001346.2	2689	98.366	1346	1	Negative	0
	1		0					DN4611_c0_g2_i1	1335	NC_003627.1	4437	96.33	1471	137		Negative	0	DN4280_c0_g1_i1	493	NC_003398.1	9596	93.103	8801	9293	Positive	0	DN28599_c0_g1_i1	312	NC_001346.2	2689	96.154	1954	2265	Positive	4.85e-145
	1		0					DN4611_c0_g2_i2	263	NC_003627.1	4437	97.03	215	14		Negative	5.6e-94	DN6669_c0_g1_i1	405	NC_003398.1	9596	86.173	3238	3642	Positive	3.07e-123
	1		0					DN4611_c0_g2_i3	222	NC_003627.1	4437	100	644	530		Negative	1.06e-55
			5
			0					Maize chlorotic mottle virus										Maize streak virus
Researcher	Sample	Host	Total	Total	Unique_Contigs	Total	Contigs	Conting	Conting	Reference	Reference	%	Coordinates			Polarity	E	Contig	Conting	Reference	Reference	%	Coordinates		Polarity	E
			Sequences	Contigs	matching to Virus	virus	Unmatch_to _PVGDB/NCBI		Length		Length	identity	Start	End			value		Length		Length	identity	Start	End		value
	2	Maize Leaf	1082692	2397	7	2	242	DN124_c1_g1_i2	4448	NC_003627.1	4437	96.679	12	4437		Positive	0	DN490_c0_g1_i1	779	NC_001346.2	2689	97.821	1248	469	Negative	0
	2							DN124_c1_g1_i1	3659	NC_003627.1	4437	96.45	946	4437		Positive	0	DN1275_c0_g1_i1	681	NC_001346.2	2689	98.889	1	360	Positive	0
	2							DN124_c1_g7_i1	589	NC_003627.1	4437	98.473	4100	4230		Positive	2.97e-60	DN1275_c0_g1_i1	681	NC_001346.2	2689	96.894	2368	2689	Positive	5.05e-153
	2							DN669_c0_g1_i1	397	NC_003627.1	4437	95.868	1550	1670		Positive	1.99e-50
	2							DN124_c1_g1_i3	250	NC_003627.1	4437	100	2435	2484		Positive	1.64e-19
	2
								Maize chlorotic mottle virus										Sugarcane mosaic virus									Maize streak virus									Maize yellow dwarf virus-RMV2
Researcher	Sample	Host	Total	Total	Unique_Contigs	Total	Contigs	Conting	Conting	Reference	Reference	%	Coordinates			Polarity	E	Contig	Conting	Reference	Reference	%	Coordinates		Polarity	E	Conting	Conting	Reference	Reference	%	Coordinates		Polarity	E	Conting	Conting	Reference	Reference	%	Coordinates		Polarity	E
			Sequences	Contigs	matching to Virus	virus	Unmatch_to _PVGDB/NCBI		Length		Length	identity	Start	End			value		Length		Length	identity	Start	End		value		Length		Length	identity	Start	End		value		Length		Length	identity	Start	End		value
	3	Maize Leaf	799100	32996	7	4	8591	DN3568_c4_g1_i3	4402	NC_003627.1	4437	96.7	4412	11		Negative	0	DN3607_c6_g1_i11	9920	NC_003398.1	9596	79.445	572	8401	positive	0	DN3088_c0_g1_i3	2417	NC_001346.2	2689	98.2	1	2108	Positive	0	DN3385_c5_g2_i1	3458	NC_029990.1	5625	96.848	1951	5399	Positive	0
	3																	DN3607_c6_g1_i11	9920	NC_003398.1	9596	88.325	8616	9596	positive	0	DN3088_c0_g1_i3	2417	NC_001346.2	2689	98	2380	2689	Positive	2.37e-151	DN11578_c0_g1_i1	1096	NC_029990.1	5625	96.947	905	1952	Positive	0
	3																																			DN4055_c0_g1_i1	657	NC_029990.1	5625	97.405	662	8	Negative	0
	3																																			DN7014_c0_g1_i1	256	NC_029990.1	5625	98.431	926	672	Negative	8.65e-127
								Maize chlorotic mottle virus										Sugarcane mosaic virus									Maize yellow dwarf virus-RMV2
Researcher	Sample	Host	Total	Total	Unique_Contigs	Total	Contigs	Conting	Conting	Reference	Reference	%	Coordinates			Polarity	E	Conting	Conting	Reference	Reference	%	Coordinates		Polarity	E	Conting	Conting	Reference	Reference	%	Coordinates		Polarity	E
			Sequences	Contigs	matching to Virus	virus	Unmatch_to _PVGDB/NCBI		Length		Length	identity	Start	End			value		Length		Length	identity	Start	End		value		Length		Length	identity	Start	End		value
	4	Maize Leaf	687779	1957	30	3	316	DN274_c4_g5_i4	3025	NC_003627.1	4437	96.694	4412	1388		Negative	0	DN263_c2_g3_i1	9605	NC_003398.1	9596	78.788	8474	14	Negative	0	DN1258_c0_g1_i1	1064	NC_029990.1	5625	98.12	3881	2821	Negative	0
	4							DN274_c4_g4_i7	968	NC_003627.1	4437	97.417	10	977		Positive	0	DN263_c2_g3_i1	9605	NC_003398.1	9596	87.361	9593	8613	Negative	0	DN1254_c0_g1_i1	755	NC_029990.1	5625	95.894	4753	5507	Positive	0
	4							DN274_c4_g3_i1	561	NC_003627.1	4437	94.945	1407	953		Negative	0	DN500_c0_g1_i1	248	NC_003398.1	9596	84.711	3554	3313	Negative	1.52e-64	DN902_c0_g1_i1	742	NC_029990.1	5625	96.496	1740	999	Negative	0
	4							DN274_c4_g3_i3	527	NC_003627.1	4437	94.144	1421	978		Negative	0										DN878_c0_g1_i1	570	NC_029990.1	5625	98.418	1037	469	Negative	0
	4							DN274_c4_g3_i5	526	NC_003627.1	4437	94.883	1421	953		Negative	0										DN899_c0_g1_i1	498	NC_029990.1	5625	97.992	1965	2462	Positive	0
	4							DN274_c4_g5_i1	481	NC_003627.1	4437	95.592	3709	3347		Negative	0										DN1356_c0_g1_i1	432	NC_029990.1	5625	94.366	3942	4361	Positive	0
	4							DN274_c4_g3_i2	460	NC_003627.1	4437	94.277	1284	953		Negative	0										DN1218_c0_g1_i1	353	NC_029990.1	5625	98.867	2806	2454	Negative	0
	4							DN49_c0_g1_i1	426	NC_003627.1	4437	93.846	1577	1706		Positive	0										DN817_c0_g1_i1	213	NC_029990.1	5625	95.261	218	8	Negative	2.06e-92
	4							DN263_c3_g1_i6	375	NC_003627.1	4437	100	4217	4184		Negative	0
	4							DN1313_c0_g1_i1	307	NC_003627.1	4437	100	4340	4307		Negative	0
	4							DN421_c0_g1_i1	304	NC_003627.1	4437	100	644	612		Negative	7.89e-11
	4							DN274_c4_g9_i1	298	NC_003627.1	4437	95.238	870	911		Positive	0
	4							DN573_c0_g1_i1	281	NC_003627.1	4437	98.077	3865	3916		Positive	1.6e-166
	4							DN274_c4_g5_i8	281	NC_003627.1	4437	98.305	4352	4176		Negative	2.63e-144
	4							DN266_c1_g3_i2	249	NC_003627.1	4437	90.566	2651	2703		Positive	2.15e-50
	4							DN274_c4_g5_i10	243	NC_003627.1	4437	90.377	1758	1520		Negative	1.99e-10
	4							DN274_c4_g2_i1	238	NC_003627.1	4437	97.436	1955	1878		Negative	1.6e-10
	4							DN426_c0_g1_i1	222	NC_003627.1	4437	97.674	905	863		Negative	5.71e-10
	4							DN274_c4_g4_i8	221	NC_003627.1	4437	100	541	618		Positive	1.2e-11
	4							DN274_c4_g5_i2	215	NC_003627.1	4437	95.238	1911	1786		Negative	6.69e-19
								Maize chlorotic mottle virus										Sugarcane mosaic virus									Maize yellow dwarf virus-RMV2									Maize streak virus - A[Ama]
Researcher	Sample	Host	Total	Total	Unique_Contigs	Total	Contigs	Conting	Conting	Reference	Reference	%	Coordinates			Polarity	E	Conting	Conting	Reference	Reference	%	Coordinates		Polarity	E	Conting	Conting	Reference	Reference	%	Coordinates		Polarity	E	Conting	Conting	Reference	Reference	%	Coordinates		Polarity	E
		Maize Leaf	Sequences	Contigs	matching to Virus	virus	Unmatch_to _PVGDB/NCBI		Length		Length	identity	Start	End	Length		value		Length		Length	identity	Start	End		value		Length		Length	identity	Start	End		value		Length		Length	identity	Start	End		value
	5		520393	520393	31	4	46	TRINITY_DN163_c0_g1_i1	297	NC_003627.1 Maize chlorotic mottle virus genomic RNA	4437	97.872	869	915	-46	Positive	4.27e-16	TRINITY_DN25_c0_g1_i1	360	NC_003398.1 Sugarcane mosaic virus	9596	91.892	8909	9204	Positive	4.56e-116	TRINITY_DN207_c0_g1_i1	223	NC_029990.1 Maize yellow dwarf virus-RMV2	5625	97.309	915	693	Negative	9.89e-106	TRINITY_DN278_c0_g1_i1	448	NC_001346.2 Maize streak virus - A[Ama]	2689	99.107	1110	663	Negative	0
	5							TRINITY_DN47_c1_g1_i1	782	NC_003627.1 Maize chlorotic mottle virus genomic RNA	4437	96.456	3309	3957	-648	Positive	0	TRINITY_DN47_c1_g5_i1	5028	NC_003398.1 Sugarcane mosaic virus	9596	80.591	660	4968	Positive	0	TRINITY_DN128_c0_g1_i1	616	NC_029990.1 Maize yellow dwarf virus-RMV2	5625	96.591	3649	4258	Positive	0
	5							TRINITY_DN47_c1_g2_i1	323	NC_003627.1 Maize chlorotic mottle virus genomic RNA	4437	96.714	1498	1286	212	Negative	2.5e-98	TRINITY_DN47_c1_g5_i1	5028	NC_003398.1 Sugarcane mosaic virus	9596	84.932	14	301	Positive	4.27e-77	TRINITY_DN162_c0_g1_i1	502	NC_029990.1 Maize yellow dwarf virus-RMV2	5625	97.8	90	589	Positive	0
								TRINITY_DN47_c1_g2_i2	230	NC_003627.1 Maize chlorotic mottle virus genomic RNA	4437	95.205	2078	1933	145	Negative	1.09e-60	TRINITY_DN47_c1_g5_i2	9522	NC_003398.1 Sugarcane mosaic virus	9596	80.095	660	8401	Positive	0	TRINITY_DN116_c0_g1_i1	385	NC_029990.1 Maize yellow dwarf virus-RMV2	5625	95.325	4783	5167	Positive	1.62e-175
								TRINITY_DN47_c1_g2_i3	2048	NC_003627.1 Maize chlorotic mottle virus genomic RNA	4437	96.533	3333	1286	2047	Negative	0	TRINITY_DN47_c1_g5_i2	9522	NC_003398.1 Sugarcane mosaic virus	9596	88.497	8594	9554	Positive	0	TRINITY_DN113_c0_g1_i1	420	NC_029990.1 Maize yellow dwarf virus-RMV2	5625	98.333	3149	3568	Positive	0
								TRINITY_DN47_c1_g3_i1	1341	NC_003627.1 Maize chlorotic mottle virus genomic RNA	4437	96.417	1265	10	1255	Negative	0										TRINITY_DN130_c0_g1_i1	765	NC_029990.1 Maize yellow dwarf virus-RMV2	5625	96.728	1976	1213	Negative	0
								TRINITY_DN47_c1_g3_i2	1351	NC_003627.1 Maize chlorotic mottle virus genomic RNA	4437	96.843	1181	10	1171	Negative	0										TRINITY_DN89_c0_g1_i1	208	NC_029990.1 Maize yellow dwarf virus-RMV2	5625	92.788	4470	4677	Positive	2.04e-82
								TRINITY_DN47_c1_g2_i4	1514	NC_003627.1 Maize chlorotic mottle virus genomic RNA	4437	96.103	3047	1534	1513	Negative	0										TRINITY_DN61_c0_g1_i1	524	NC_029990.1 Maize yellow dwarf virus-RMV2	5625	98.473	2380	2903	Positive	0
								TRINITY_DN47_c1_g2_i5	219	NC_003627.1 Maize chlorotic mottle virus genomic RNA	4437	96.25	3056	2978	78	Negative	1.08e-30
								TRINITY_DN47_c1_g1_i2	1100	NC_003627.1 Maize chlorotic mottle virus genomic RNA	4437	96.841	3309	4226	-917	Positive	0
								TRINITY_DN47_c1_g2_i6	251	NC_003627.1 Maize chlorotic mottle virus genomic RNA	4437	95.092	2443	2281	162	Negative	5.51e-69
								TRINITY_DN47_c1_g2_i7	476	NC_003627.1 Maize chlorotic mottle virus genomic RNA	4437	96.915	1674	1286	388	Negative	0
								TRINITY_DN47_c1_g2_i11	1897	NC_003627.1 Maize chlorotic mottle virus genomic RNA	4437	96.377	3024	1286	1738	Negative	0
								TRINITY_DN47_c1_g3_i3	1021	NC_003627.1 Maize chlorotic mottle virus genomic RNA	4437	97.172	893	10	883	Negative	0
								TRINITY_DN47_c1_g3_i4	303	NC_003627.1 Maize chlorotic mottle virus genomic RNA	4437	97.073	214	10	204	Negative	1.4e-95
								TRINITY_DN47_c1_g3_i5	992	NC_003627.1 Maize chlorotic mottle virus genomic RNA	4437	97.225	910	10	900	Polarity	0
								TRINITY_DN47_c1_g1_i3	1105	NC_003627.1 Maize chlorotic mottle virus genomic RNA	4437	97.195	3309	4413	-1104	Positive	0
								TRINITY_DN47_c1_g3_i6	764	NC_003627.1 Maize chlorotic mottle virus genomic RNA	4437	96.828	671	10	661	Negative	0
								TRINITY_DN47_c1_g2_i12	1836	NC_003627.1 Maize chlorotic mottle virus genomic RNA	4437	96.334	3031	1286	1745	Negative	0
								Maize chlorotic mottle virus										Sugarcane mosaic virus									Maize streak virus									Hubei Poty-like virus 1 strain SCM51506 polyprotein gene
Researcher	Sample	Host	Total	Total	Unique_Contigs	Total	Contigs	Conting	Conting	Reference	Reference	%	Coordinates			Polarity	E	Conting	Conting	Reference	Reference	%	Coordinates		Polarity	E	Conting	Conting	Reference	Reference	%	Coordinates		Polarity	E	Conting	Conting	Reference	Reference	%	Coordinates		Polarity	E
		Maize Leaf	Sequences	Contigs	matching to Virus	virus	Unmatch_to _PVGDB/NCBI		Length		Length	identity	Start	End			value		Length		Length	identity	Start	End		value		Length		Length	identity	Start	End		value		Length		Length	identity	Start	End		value
	6		439279	2694	75	4	430	TRINITY_DN278_c23_g1_i22	3775	NC_003627.1	4437	96.689	4410	757	3653	Negative	0	TRINITY_DN271_c1_g2_i2	5363	NC_003398.1	9596	87.677	9596	8611	Negative	0	TRINITY_DN268_c0_g1_i1	2273	NC_001346.2 Maize streak virus - A[Ama]	2689	97.506	2205	1	Negative	0	TRINITY_DN271_c1_g2_i5	4243	NC_032912.1	9356	76.753	7779	4319	Negative	0
	6							TRINITY_DN278_c23_g1_i2	3729	NC_003627.1	4437	96.657	4405	757		Negative	0	TRINITY_DN271_c1_g2_i1	5147	NC_003398.1	9596	90.25	9368	8611	Negative	0	TRINITY_DN268_c0_g1_i1	2273	NC_001346.2 Maize streak virus - A[Ama]	2689	98.462	2689	2625	Negative	3.44e-25
	6							TRINITY_DN278_c23_g1_i13	2827	NC_003627.1	4437	96.619	3507	757		Negative	0	TRINITY_DN271_c1_g2_i4	4732	NC_003398.1	9596	85.196	8941	8611	Negative	1.09e-92	TRINITY_DN268_c0_g2_i2	411	NC_001346.2 Maize streak virus - A[Ama]	2689	95.157	2237	2649	Positive	0
	6							TRINITY_DN287_c4_g1_i24	2668	NC_003627.1	4437	98.182	3031	2977		Negative	1.47e-19	TRINITY_DN271_c1_g4_i1	2346	NC_003398.1	9596	79.742	2025	4348	Positive	0	TRINITY_DN268_c0_g2_i1	383	NC_001346.2 Maize streak virus - A[Ama]	2689	97.059	2237	2542	Positive	1.3e-146
	6							TRINITY_DN278_c23_g1_i3	2242	NC_003627.1	4437	96.367	2793	757		Negative	0	TRINITY_DN271_c1_g1_i1	2031	NC_003398.1	9596	75.855	2048	18	Negative	0
	6							TRINITY_DN278_c22_g2_i3	1024	NC_003627.1	4437	97.013	780	11		Negative	0
	6							TRINITY_DN46_c0_g1_i2	764	NC_003627.1	4437	100	886	915		Positive	6.98e-08
	6							TRINITY_DN279_c3_g8_i4	571	NC_003627.1	4437	97.826	867	912		Positive	3.06e-15
	6							TRINITY_DN233_c0_g1_i1	498	NC_003627.1	4437	100	2929	2901		Negative	1.61e-07
	6							TRINITY_DN178_c0_g1_i1	446	NC_003627.1	4437	95.455	180	223		Positive	1.42e-12
	6							TRINITY_DN27_c0_g1_i1	380	NC_003627.1	4437	96.19	1901	2005		Positive	3.21e-43
	6							TRINITY_DN872_c0_g1_i1	373	NC_003627.1	4437	91.379	1886	1829		Negative	7.06e-15
	6							TRINITY_DN1443_c0_g1_i1	366	NC_003627.1	4437	97.917	1809	1762		Negative	1.49e-16
	6							TRINITY_DN72_c0_g1_i1	365	NC_003627.1	4437	97.895	809	903		Positive	5.15e-41
	6							TRINITY_DN290_c4_g4_i6	360	NC_003627.1	4437	97.938	803	899		Positive	3.92e-42
	6							TRINITY_DN278_c23_g1_i23	349	NC_003627.1	4437	95.349	2798	2584		Negative	2.11e-94
	6							TRINITY_DN206_c0_g1_i2	322	NC_003627.1	4437	93.182	2348	2261		Negative	1.64e-30
	6							TRINITY_DN282_c2_g3_i1	322	NC_003627.1	4437	97.222	4182	4217		Positive	2.18e-09
	6							TRINITY_DN221_c0_g1_i1	313	NC_003627.1	4437	96.591	3732	3645		Negative	1.58e-35
	6							TRINITY_DN935_c0_g1_i1	312	NC_003627.1	4437	95.455	856	921		Positive	2.67e-23
	6							TRINITY_DN708_c0_g1_i1	305	NC_003627.1	4437	95.868	2679	2799		Positive	5.41e-50
	6							TRINITY_DN279_c3_g4_i2	301	NC_003627.1	4437	96.104	2693	2769		Positive	1.97e-29
	6							TRINITY_DN1860_c0_g1_i1	298	NC_003627.1	4437	94.828	869	926		Positive	2.56e-18
	6							TRINITY_DN1877_c0_g1_i1	298	NC_003627.1	4437	99.038	2953	3056		Positive	8.84e-48
	6							TRINITY_DN278_c23_g1_i17	297	NC_003627.1	4437	99.254	1031	898		Negative	6.66e-64
	6							TRINITY_DN1077_c0_g1_i1	297	NC_003627.1	4437	91.549	147	77		Negative	1.53e-20
	6							TRINITY_DN58_c0_g1_i1	296	NC_003627.1	4437	77.841	2307	2134		Negative	2.53e-23
	6							TRINITY_DN84_c0_g1_i1	295	NC_003627.1	4437	95.556	1774	1817		Positive	9.18e-13
	6							TRINITY_DN278_c23_g1_i24	292	NC_003627.1	4437	96.8	1811	1687		Negative	1.84e-54
	6							TRINITY_DN374_c0_g1_i1	288	NC_003627.1	4437	96.04	3236	3136		Negative	3.99e-41
	6							TRINITY_DN933_c0_g1_i1	283	NC_003627.1	4437	96.923	3014	3078		Positive	6.69e-24
	6							TRINITY_DN251_c0_g2_i2	282	NC_003627.1	4437	97.826	4414	4323		Negative	6.53e-39
	6							TRINITY_DN115_c0_g1_i1	280	NC_003627.1	4437	92.8	1666	1544		Negative	4.97e-45
	6							TRINITY_DN1594_c0_g1_i1	280	NC_003627.1	4437	96.97	250	218		Negative	2.43e-08
	6							TRINITY_DN217_c0_g1_i1	273	NC_003627.1	4437	94.574	1728	1600		Negative	1.03e-51
	6							TRINITY_DN217_c0_g1_i2	273	NC_003627.1	4437	93.846	1729	1600		Negative	1.34e-50
	6							TRINITY_DN278_c23_g1_i20	267	NC_003627.1	4437	97.674	928	757		Negative	1.25e-80
	6							TRINITY_DN278_c23_g1_i4	266	NC_003627.1	4437	95.935	1809	1687		Negative	1e-51
	6							TRINITY_DN249_c0_g1_i1	264	NC_003627.1	4437	92.593	523	574		Positive	6.29e-14
	6							TRINITY_DN278_c23_g1_i16	256	NC_003627.1	4437	95.62	2089	1953		Negative	7.39e-58
	6							TRINITY_DN278_c23_g1_i19	255	NC_003627.1	4437	92.537	2881	2748		Negative	1.6e-49
	6							TRINITY_DN278_c23_g1_i11	253	NC_003627.1	4437	96.85	1805	1679		Negative	1.22e-55
	6							TRINITY_DN280_c0_g1_i1	249	NC_003627.1	4437	100	3411	3373		Negative	2.12e-13
	6							TRINITY_DN1097_c0_g1_i1	249	NC_003627.1	4437	100	979	1017		Positive	2.12e-13
	6							TRINITY_DN278_c23_g1_i8	247	NC_003627.1	4437	94.161	1290	1154		Negative	1.54e-54
	6							TRINITY_DN278_c23_g1_i1	246	NC_003627.1	4437	96.721	1808	1687		Negative	7.12e-53
	6							TRINITY_DN217_c0_g1_i3	241	NC_003627.1	4437	92.8	1723	1600		Negative	1.17e-45
	6							TRINITY_DN168_c0_g1_i1	241	NC_003627.1	4437	96.429	4097	4042		Negative	1.57e-19
	6							TRINITY_DN278_c23_g1_i14	239	NC_003627.1	4437	94.611	1955	1789		Negative	5.22e-69
	6							TRINITY_DN284_c3_g2_i1	238	NC_003627.1	4437	98.198	919	809		Negative	4.13e-50
	6							TRINITY_DN767_c0_g1_i1	238	NC_003627.1	4437	97.015	3546	3481		Negative	4.28e-25
	6							TRINITY_DN278_c23_g1_i5	232	NC_003627.1	4437	95.302	2427	2279		Negative	6.58e-63
	6							TRINITY_DN257_c0_g1_i1	231	NC_003627.1	4437	94.068	2679	2796		Positive	4.03e-45
	6							TRINITY_DN278_c23_g1_i12	228	NC_003627.1	4437	96.053	1940	1789		Negative	2.98e-66
	6							TRINITY_DN257_c0_g1_i2	227	NC_003627.1	4437	93.701	2679	2804		Positive	1.82e-48
	6							TRINITY_DN58_c0_g1_i2	223	NC_003627.1	4437	96.04	2307	2207		Negative	3.02e-41
	6							TRINITY_DN278_c23_g1_i7	222	NC_003627.1	4437	96.296	4107	3974		Negative	6.31e-58
	6							TRINITY_DN58_c0_g1_i3	222	NC_003627.1	4437	93.333	2310	2207		Negative	6.49e-38
	6							TRINITY_DN278_c23_g1_i10	211	NC_003627.1	4437	95.968	1810	1687		Negative	2.16e-52
	6							TRINITY_DN286_c0_g1_i1	208	NC_003627.1	4437	98.851	2529	2444		Negative	6.04e-38
	6							TRINITY_DN932_c0_g1_i1	207	NC_003627.1	4437	100	1341	1313		Negative	6.27e-08
	6							TRINITY_DN278_c23_g1_i9	204	NC_003627.1	4437	96.667	1806	1687		Negative	7.48e-52
	6							TRINITY_DN278_c23_g1_i18	203	NC_003627.1	4437	98.374	1019	898		Negative	2.66e-56
	6							TRINITY_DN162_c0_g1_i1	202	NC_003627.1	4437	95.506	2711	2799		Positive	1.27e-34
	6
								Maize chlorotic mottle virus										Sugarcane mosaic virus									Maize streak virus									Maize yellow dwarf virus-RMV2
Researcher	Sample	Host	Total	Total	Unique_Contigs	Total	Contigs	Conting	Conting	Reference	Reference	%	Coordinates			Polarity	E	Conting	Conting	Reference	Reference	%	Coordinates		Polarity	E	Conting	Conting	Reference	Reference	%	Coordinates		Polarity	E	Conting	Conting	Reference	Reference	%	Coordinates		Polarity	E
		Maize Tassel	Sequences	Contigs	matching to Virus	virus	Unmatch_to _PVGDB/NCBI		Length		Length	identity	Start	End			value		Length		Length	identity	Start	End		value		Length		Length	identity	Start	End		value		Length		Length	identity	Start	End		value
	7		460009	5019	10	4	892	TRINITY_DN548_c4_g5_i3	4527	NC_003627.1	4437	96.643	4414	6		Negative	0	TRINITY_DN560_c1_g1_i3	9503	NC_003398.1	9596	82.318	8488	17	Negative	0	TRINITY_DN553_c0_g2_i1	2291	NC_001346.2	2689	97.807	2689	820	Positive	0	TRINITY_DN2997_c0_g1_i1	318	NC_029990.1	5625	97.484	2517	2200	Positive	4.88e-155
	7																	TRINITY_DN560_c1_g1_i3	9503	NC_003398.1	9596	87.905	9533	8613	Negative	0	TRINITY_DN553_c0_g2_i1	2291	NC_001346.2	2689	99.763	422	1	Positive	0	TRINITY_DN793_c0_g1_i1	204	NC_029990.1	5625	98.03	3436	3234	Positive	5.43e-98
	7																	TRINITY_DN548_c4_g4_i1	2746	NC_003398.1	9596	90.615	2777	32	Negative	0
	7																	TRINITY_DN537_c0_g1_i2	2356	NC_003398.1	9596	80.034	2768	5122	Positive	0
	7																	TRINITY_DN537_c0_g1_i1	2170	NC_003398.1	9596	79.935	2768	4927	Positive	0
	7
	7
	7
	7
								Maize chlorotic mottle virus										Sugarcane mosaic virus									Maize streak virus									Sweet potato latent virus									Brazilian weed virus Y isolate KLL097
Researcher	Sample	Host	Total	Total	Unique_Contigs	Total	Contigs	Conting	Conting	Reference	Reference	%	Coordinates			Polarity	E	Conting	Conting	Reference	Reference	%	Coordinates		Polarity	E	Conting	Conting	Reference	Reference	%	Coordinates		Polarity	E	Conting	Conting	Reference	Reference	%	Coordinates		Polarity	E	Conting	Conting	Reference	Reference	%
			Sequences	Contigs	matching to Virus	virus	Unmatch_to _PVGDB/NCBI		Length		Length	identity	Start	End			value		Length		Length	identity	Start	End		value		Length		Length	identity	Start	End		value		Length		Length	identity	Start	End		value		Length		Length	identity
	8	Shorghum	1019166	2328	25	5	222	DN242_c0_g1_i6	4702	NC_003627.1 Maize chlorotic mottle virus genomic RNA	4437	96.729	4415	14	4401	Negative	0	DN263_c3_g1_i17	9836	NC_003398.1 Sugarcane mosaic virus	9596	86.525	8474	14	Negative	0	DN996_c0_g1_i1	735	NC_001346.2 Maize streak virus - A[Ama]	2689	98.231	1176	442	Negative	0	DN263_c3_g1_i18	2409	NC_020896.1 Sweet potato latent virus	10081	75.926	8428	8001	Negative	3.5e-55	DN141_c0_g1_i1	828	NC_030847.1	9837	77.778
	8							DN242_c0_g1_i3	3142	NC_003627.1 Maize chlorotic mottle virus genomic RNA	4437	96.489	3032	14	3018	Negative	0	DN263_c3_g1_i17	9836	NC_003398.1 Sugarcane mosaic virus	9596	86.869	9596	8613	Negative	0	DN303_c0_g1_i1	344	NC_001346.2 Maize streak virus - A[Ama]	2689	98.256	76	419	Positive	8.64e-173
	8							DN242_c0_g1_i4	2924	NC_003627.1 Maize chlorotic mottle virus genomic RNA	4437	96.45	2801	14	2787	Negative	0	DN263_c3_g1_i19	9797	NC_003398.1 Sugarcane mosaic virus	9596	86.618	8488	14	Negative	0	DN288_c0_g1_i1	287	NC_001346.2 Maize streak virus - A[Ama]	2689	99.254	1555	1288	Negative	2.69e-137
	8							DN242_c0_g1_i1	2304	NC_003627.1 Maize chlorotic mottle virus genomic RNA	4437	96.55	2187	14	2173	Negative	0	DN263_c3_g1_i4	8519	NC_003398.1 Sugarcane mosaic virus	9596	86.677	8431	14	Negative	0
	8							DN242_c0_g1_i5	1767	NC_003627.1 Maize chlorotic mottle virus genomic RNA	4437	96.617	3495	1811	1684	Negative	0	DN263_c3_g1_i12	4480	NC_003398.1 Sugarcane mosaic virus	9596	81.752	8488	5495	Negative	0
	8							DN242_c0_g1_i2	1190	NC_003627.1 Maize chlorotic mottle virus genomic RNA	4437	96.251	2797	1811	986	Negative	0	DN263_c3_g1_i2	1457	NC_003398.1 Sugarcane mosaic virus	9596	88.615	4994	3616	Negative	0
	8							DN242_c0_g1_i7	257	NC_003627.1 Maize chlorotic mottle virus genomic RNA	4437	96.124	142	14	128	Negative	4.46e-55	DN263_c2_g1_i1	1327	NC_003398.1 Sugarcane mosaic virus	9596	79.009	2866	4153	Positive	0
	8																	DN263_c3_g1_i1	794	NC_003398.1 Sugarcane mosaic virus	9596	87.356	6191	5496	Negative	0
	8																	DN263_c3_g1_i13	486	NC_003398.1 Sugarcane mosaic virus	9596	90.544	5525	5103	Negative	7.58e-160
	8																	DN263_c3_g1_i11	404	NC_003398.1 Sugarcane mosaic virus	9596	84.29	3352	3022	Negative	8.93e-89
	8																	DN263_c3_g1_i10	381	NC_003398.1 Sugarcane mosaic virus	9596	90.523	3044	2741	Negative	3.77e-112
	8																	DN263_c3_g1_i16	271	NC_003398.1 Sugarcane mosaic virus	9596	89.865	2814	2670	Negative	7.97e-48
	8																	DN263_c3_g1_i16	271	NC_003398.1 Sugarcane mosaic virus	9596	95.745	2763	2670	Negative	2.91e-37
	8																	DN263_c3_g1_i16	271	NC_003398.1 Sugarcane mosaic virus	9596	85.714	2814	2741	Negative	5.01e-15
	8																	DN524_c0_g1_i1	487	NC_003377.1 Maize dwarf mosaic virus	9515	75.289	823	1245	Positive	4.13e-48
	8
	8
	8
								Maize chlorotic mottle virus										Sugarcane mosaic virus									Maize streak virus									Maize yellow dwarf virus-RMV2
Researcher	Sample	Host	Total	Total	Unique_Contigs	Total	Contigs	Conting	Conting	Reference	Reference	%	Coordinates			Polarity	E	Conting	Conting	Reference	Reference	%	Coordinates		Polarity	E	Conting	Conting	Reference	Reference	%	Coordinates		Polarity	E	Conting	Conting	Reference	Reference	%	Coordinates		Polarity	E
		Maize Leaf	Sequences	Contigs	matching to Virus	virus	Unmatch_to _PVGDB/NCBI		Length		Length	identity	Start	End			value		Length		Length	identity	Start	End		value		Length		Length	identity	Start	End		value		Length		Length	identity	Start	End		value
	9		780057	1517	21	4	124	TRINITY_DN48_c0_g1_i1	4437	NC_003627.1	1559	96.216	3233	1675	1558	Negative	0	TRINITY_DN160_c4_g7_i1	9563	NC_003398.1	9596	86.273	9589	18	Negative	0	TRINITY_DN160_c4_g5_i1	1222	NC_001346.2	2689	96.976	1698	2689	Positive	0	TRINITY_DN197_c0_g1_i1	703	NC_029990.1	5625	97.724	2866	3568	Positive	0
	9							TRINITY_DN48_c0_g1_i2	4437	NC_003627.1	799	95.552	2370	1675	695	Negative	0										TRINITY_DN160_c4_g5_i1	1222	NC_001346.2	2689	98.696	1	230	Positive	7.52e-114	TRINITY_DN194_c0_g1_i1	516	NC_029990.1	5625	95.93	5211	4696	Negative	0
	9							TRINITY_DN160_c1_g1_i2	4437	NC_003627.1	792	96.591	370	1161	-791	Positive	0										TRINITY_DN160_c4_g6_i2	927	NC_001346.2	2689	99.138	1722	795	Negative	0	TRINITY_DN684_c0_g1_i1	453	NC_029990.1	5625	95.806	884	1336	Positive	0
	9							TRINITY_DN160_c1_g1_i1	4437	NC_003627.1	614	97.096	370	920	-550	Positive	0										TRINITY_DN160_c4_g6_i1	577	NC_001346.2	2689	98.746	1352	795	Negative	0	TRINITY_DN222_c0_g1_i1	317	NC_029990.1	5625	95.899	5208	5524	Positive	3.81e-146
	9							TRINITY_DN62_c0_g1_i1	4437	NC_003627.1	561	97.326	3849	4409	-560	Positive	0										TRINITY_DN160_c4_g2_i2	493	NC_001346.2	2689	97.634	670	206	Negative	0	TRINITY_DN696_c0_g1_i1	256	NC_029990.1	5625	96.875	2208	2463	Positive	1.13e-120
	9							TRINITY_DN118_c0_g1_i1	4437	NC_003627.1	547	96.344	1694	1148	546	Negative	0										TRINITY_DN160_c4_g2_i1	475	NC_001346.2	2689	97.669	677	206	Negative	0	TRINITY_DN615_c0_g1_i1	239	NC_029990.1	5625	97.479	3969	3735	Negative	6.34e-113
	9							TRINITY_DN534_c0_g1_i1	4437	NC_003627.1	519	97.683	3224	3741	-517	Positive	0										TRINITY_DN160_c4_g5_i2	339	NC_001346.2	2689	98.113	52	210	Positive	5.85e-75
	9							TRINITY_DN191_c0_g1_i1	4437	NC_003627.1	313	97.125	334	22	312	Negative	1.34e-150
								Maize chlorotic mottle virus										Sugarcane mosaic virus									Maize streak virus									Maize yellow dwarf virus-RMV2
Researcher	Sample	Host	Total	Total	Unique_Contigs	Total	Contigs	Conting	Conting	Reference	Reference	%	Coordinates			Polarity	E	Conting	Conting	Reference	Reference	%	Coordinates		Polarity	E	Conting	Conting	Reference	Reference	%	Coordinates		Polarity	E	Conting	Conting	Reference	Reference	%	Coordinates		Polarity	E
		Maize (baby corn)	Sequences	Contigs	matching to Virus	virus	Unmatch_to _PVGDB/NCBI		Length		Length	identity	Start	End			value		Length		Length	identity	Start	End		value		Length		Length	identity	Start	End		value		Length		Length	identity	Start	End		value
	10
	10
	10							R2 File was empty
	10
	10
	10
	10
	10
								Maize chlorotic mottle virus										Sugarcane mosaic virus									Maize streak virus									Pennisetum mosaic virus
Researcher	Sample	Host	Total	Total	Unique_Contigs	Total	Contigs	Conting	Conting	Reference	Reference	%	Coordinates			Polarity	E	Conting	Conting	Reference	Reference	%	Coordinates		Polarity	E	Conting	Conting	Reference	Reference	%	Coordinates		Polarity	E	Conting	Conting	Reference	Reference	%	Coordinates		Polarity	E
		Maize Leaf	Sequences	Contigs	matching to Virus	virus	Unmatch_to _PVGDB/NCBI		Length		Length	identity	Start	End			value		Length		Length	identity	Start	End		value		Length		Length	identity	Start	End		value		Length		Length	identity	Start	End		value
DNS	11		750584	176246	106	4	60733	TRINITY_DN27451_c8_g1_i1	2192	NC_003627.1 Maize chlorotic mottle virus genomic RNA	4437	96.438	3826	1637	2189	Negative	0	TRINITY_DN27921_c0_g1_i3	2803	NC_003398.1 Sugarcane mosaic virus	9596	89.575	9387	8613	Negative	0	TRINITY_DN27338_c0_g2_i1	853	NC_001346.2 Maize streak virus - A[Ama]	2689	97.608	2063	2689	Positive	0	TRINITY_DN27921_c0_g1_i3	2803	NC_007147.1 Pennisetum mosaic virus	9611	80.169	9397	8693	Negative	2.15e-147
DNS	11							TRINITY_DN28127_c0_g1_i5	1536	NC_003627.1 Maize chlorotic mottle virus genomic RNA	4437	95.699	2703	2795	-92	Positive	6.35e-36	TRINITY_DN28478_c0_g1_i2	6306	NC_003398.1 Sugarcane mosaic virus	9596	78.553	6268	37	Negative	0	TRINITY_DN27338_c0_g2_i1	853	NC_001346.2 Maize streak virus - A[Ama]	2689	98.673	1	226	Positive	8.72e-112
DNS	11							TRINITY_DN27451_c8_g2_i2	1440	NC_003627.1 Maize chlorotic mottle virus genomic RNA	4437	96.389	1453	14	1439	Negative	0	TRINITY_DN133552_c0_g1_i1	250	NC_003398.1 Sugarcane mosaic virus	9596	93.976	141	389	Positive	4.04e-105	TRINITY_DN27338_c0_g1_i1	641	NC_001346.2 Maize streak virus - A[Ama]	2689	97.816	842	202	Negative	0
DNS	11							TRINITY_DN26738_c0_g1_i1	1423	NC_003627.1 Maize chlorotic mottle virus genomic RNA	4437	98.98	4249	4152	97	Negative	9.69e-44										TRINITY_DN27338_c0_g4_i1	330	NC_001346.2 Maize streak virus - A[Ama]	2689	99.394	818	1147	Positive	1.07e-171
DNS	11							TRINITY_DN25727_c0_g1_i1	847	NC_003627.1 Maize chlorotic mottle virus genomic RNA	4437	99.099	1021	911	110	Negative	3.39e-51										TRINITY_DN27338_c0_g3_i1	261	NC_001346.2 Maize streak virus - A[Ama]	2689	94.275	2377	2638	Positive	9.03e-112
DNS	11							TRINITY_DN28516_c0_g9_i2	800	NC_003627.1 Maize chlorotic mottle virus genomic RNA	4437	94.792	3153	3058	95	Negative	3.26e-36										TRINITY_DN27338_c0_g1_i2	256	NC_001346.2 Maize streak virus - A[Ama]	2689	95.413	677	460	Negative	3.25e-96
DNS	11							TRINITY_DN18183_c0_g1_i1	764	NC_003627.1 Maize chlorotic mottle virus genomic RNA	4437	100	3452	3502	-50	Positive	1.48e-19										TRINITY_DN27338_c0_g1_i2	256	NC_001346.2 Maize streak virus - A[Ama]	2689	100	2400	2440	Positive	1.69e-14
DNS	11							TRINITY_DN25157_c0_g2_i1	758	NC_003627.1 Maize chlorotic mottle virus genomic RNA	4437	95.69	1558	1673	-115	Positive	2.35e-47
								TRINITY_DN25125_c0_g2_i1	581	NC_003627.1 Maize chlorotic mottle virus genomic RNA	4437	97.619	3026	2985	41	Negative	5.22e-13
								TRINITY_DN90543_c0_g1_i1	497	NC_003627.1 Maize chlorotic mottle virus genomic RNA	4437	97.917	928	1022	-94	Positive	7.11e-41
								TRINITY_DN94693_c0_g1_i1	439	NC_003627.1 Maize chlorotic mottle virus genomic RNA	4437	94.681	2800	2707	93	Negative	2.26e-35
								TRINITY_DN82691_c0_g1_i1	420	NC_003627.1 Maize chlorotic mottle virus genomic RNA	4437	87.619	2672	2568	104	Negative	3.64e-28
								TRINITY_DN19988_c0_g1_i1	417	NC_003627.1 Maize chlorotic mottle virus genomic RNA	4437	93.333	575	517	58	Negative	1.32e-17
								TRINITY_DN27298_c0_g2_i2	397	NC_003627.1 Maize chlorotic mottle virus genomic RNA	4437	94.702	897	1042	-145	Positive	1.97e-60
								TRINITY_DN13261_c0_g1_i1	387	NC_003627.1 Maize chlorotic mottle virus genomic RNA	4437	96.61	88	146	-58	Positive	5.63e-21
								TRINITY_DN12678_c0_g1_i2	386	NC_003627.1 Maize chlorotic mottle virus genomic RNA	4437	96.094	4415	4288	127	Negative	2.49e-54
								TRINITY_DN5318_c0_g1_i1	366	NC_003627.1 Maize chlorotic mottle virus genomic RNA	4437	100	959	1026	-67	Positive	2.44e-29
								TRINITY_DN27644_c0_g1_i6	348	NC_003627.1 Maize chlorotic mottle virus genomic RNA	4437	96.97	2792	2661	131	Negative	2.86e-58
								TRINITY_DN22559_c0_g1_i2	337	NC_003627.1 Maize chlorotic mottle virus genomic RNA	4437	100	1026	954	72	Negative	3.7e-32
								TRINITY_DN24952_c0_g2_i2	322	NC_003627.1 Maize chlorotic mottle virus genomic RNA	4437	97.917	4317	4412	-95	Positive	1.25e-41
								TRINITY_DN28419_c1_g4_i1	313	NC_003627.1 Maize chlorotic mottle virus genomic RNA	4437	93.651	146	84	62	Negative	5.81e-20
								TRINITY_DN26422_c3_g2_i1	313	NC_003627.1 Maize chlorotic mottle virus genomic RNA	4437	98.305	4414	4297	117	Negative	7.15e-54
								TRINITY_DN27566_c0_g1_i6	312	NC_003627.1 Maize chlorotic mottle virus genomic RNA	4437	100	3010	3038	-28	Positive	9.82e-08
								TRINITY_DN28653_c2_g2_i1	310	NC_003627.1 Maize chlorotic mottle virus genomic RNA	4437	98.795	4131	4213	-82	Positive	4.35e-36
								TRINITY_DN85865_c0_g1_i1	306	NC_003627.1 Maize chlorotic mottle virus genomic RNA	4437	97.619	4152	4235	-83	Positive	5.55e-35
								TRINITY_DN28567_c0_g3_i4	303	NC_003627.1 Maize chlorotic mottle virus genomic RNA	4437	94.175	4130	4232	-102	Positive	2.54e-38
								TRINITY_DN16001_c0_g1_i1	296	NC_003627.1 Maize chlorotic mottle virus genomic RNA	4437	93.827	1041	961	80	Negative	2.51e-28
								TRINITY_DN15563_c0_g1_i1	296	NC_003627.1 Maize chlorotic mottle virus genomic RNA	4437	95.652	903	813	90	Negative	1.49e-35
								TRINITY_DN28454_c0_g12_i3	294	NC_003627.1 Maize chlorotic mottle virus genomic RNA	4437	95.062	2317	2397	-80	Positive	5.35e-30
								TRINITY_DN27416_c8_g1_i1	285	NC_003627.1 Maize chlorotic mottle virus genomic RNA	4437	97.872	2982	3028	-46	Positive	4.09e-16
								TRINITY_DN28195_c3_g6_i1	261	NC_003627.1 Maize chlorotic mottle virus genomic RNA	4437	94.958	2627	2745	-118	Positive	2.75e-47
								TRINITY_DN9399_c0_g1_i2	261	NC_003627.1 Maize chlorotic mottle virus genomic RNA	4437	98.824	3343	3427	-84	Positive	2.79e-37
								TRINITY_DN25704_c0_g1_i2	259	NC_003627.1 Maize chlorotic mottle virus genomic RNA	4437	97.895	2980	3074	-94	Positive	3.56e-41
								TRINITY_DN21555_c0_g1_i1	257	NC_003627.1 Maize chlorotic mottle virus genomic RNA	4437	97.101	3051	3119	-68	Positive	1e-26
								TRINITY_DN27443_c4_g15_i1	254	NC_003627.1 Maize chlorotic mottle virus genomic RNA	4437	95.96	2701	2799	-98	Positive	4.5e-40
								TRINITY_DN16547_c0_g1_i1	251	NC_003627.1 Maize chlorotic mottle virus genomic RNA	4437	100	529	567	-38	Positive	2.14e-13
								TRINITY_DN19255_c0_g2_i1	251	NC_003627.1 Maize chlorotic mottle virus genomic RNA	4437	97.368	1496	1460	36	Negative	1.29e-10
								TRINITY_DN46477_c0_g1_i1	251	NC_003627.1 Maize chlorotic mottle virus genomic RNA	4437	96.25	2953	3032	-79	Positive	3.48e-31
								TRINITY_DN26037_c0_g3_i2	251	NC_003627.1 Maize chlorotic mottle virus genomic RNA	4437	98.718	2952	3029	-77	Positive	2.08e-33
								TRINITY_DN75463_c0_g1_i1	251	NC_003627.1 Maize chlorotic mottle virus genomic RNA	4437	95.652	3434	3502	-68	Positive	4.54e-25
								TRINITY_DN32915_c0_g1_i1	251	NC_003627.1 Maize chlorotic mottle virus genomic RNA	4437	98.333	2972	3031	-59	Positive	2.11e-23
								TRINITY_DN17778_c0_g1_i2	251	NC_003627.1 Maize chlorotic mottle virus genomic RNA	4437	95.652	2800	2663	137	Negative	2.01e-58
								TRINITY_DN9085_c0_g1_i2	251	NC_003627.1 Maize chlorotic mottle virus genomic RNA	4437	100	1025	938	87	Negative	1.24e-40
								TRINITY_DN5795_c0_g1_i1	251	NC_003627.1 Maize chlorotic mottle virus genomic RNA	4437	95	2962	3060	-98	Positive	7.44e-38
								TRINITY_DN27872_c2_g1_i7	251	NC_003627.1 Maize chlorotic mottle virus genomic RNA	4437	96.296	2797	2663	134	Negative	2.01e-58
								TRINITY_DN44156_c0_g1_i1	251	NC_003627.1 Maize chlorotic mottle virus genomic RNA	4437	94.565	4321	4409	-88	Positive	2.08e-33
								TRINITY_DN44755_c0_g1_i1	251	NC_003627.1 Maize chlorotic mottle virus genomic RNA	4437	95.89	856	928	-72	Positive	2.71e-27
								TRINITY_DN21521_c1_g1_i1	251	NC_003627.1 Maize chlorotic mottle virus genomic RNA	4437	100	4342	4399	-57	Positive	5.87e-24
								TRINITY_DN45692_c0_g1_i1	251	NC_003627.1 Maize chlorotic mottle virus genomic RNA	4437	97.297	2985	3021	-36	Positive	1.29e-10
								TRINITY_DN60085_c0_g1_i1	251	NC_003627.1 Maize chlorotic mottle virus genomic RNA	4437	98.551	2973	3041	-68	Positive	2.1e-28
								TRINITY_DN92860_c0_g1_i1	251	NC_003627.1 Maize chlorotic mottle virus genomic RNA	4437	100	4235	4184	51	Negative	1.27e-20
								TRINITY_DN114541_c0_g1_i1	251	NC_003627.1 Maize chlorotic mottle virus genomic RNA	4437	96.875	1820	1883	-63	Positive	5.87e-24
								TRINITY_DN111575_c0_g1_i1	251	NC_003627.1 Maize chlorotic mottle virus genomic RNA	4437	100	4412	4360	52	Negative	3.53e-21
								TRINITY_DN100236_c0_g1_i1	251	NC_003627.1 Maize chlorotic mottle virus genomic RNA	4437	98.039	928	879	49	Negative	7.65e-18
								TRINITY_DN31688_c1_g1_i1	250	NC_003627.1 Maize chlorotic mottle virus genomic RNA	4437	100	1483	1544	-61	Positive	3.49e-26
								TRINITY_DN86817_c0_g1_i1	250	NC_003627.1 Maize chlorotic mottle virus genomic RNA	4437	96	2813	2764	49	Negative	3.54e-16
								TRINITY_DN70711_c0_g1_i1	250	NC_003627.1 Maize chlorotic mottle virus genomic RNA	4437	94.872	2975	3051	-76	Positive	7.51e-28
								TRINITY_DN16239_c0_g1_i1	250	NC_003627.1 Maize chlorotic mottle virus genomic RNA	4437	98.438	2964	3027	-63	Positive	1.26e-25
								TRINITY_DN21970_c0_g1_i1	250	NC_003627.1 Maize chlorotic mottle virus genomic RNA	4437	100	1806	1777	29	Negative	2.15e-08
								TRINITY_DN49285_c0_g1_i1	250	NC_003627.1 Maize chlorotic mottle virus genomic RNA	4437	96.667	3083	3024	59	Negative	9.78e-22
								TRINITY_DN80222_c0_g1_i1	250	NC_003627.1 Maize chlorotic mottle virus genomic RNA	4437	94.737	1461	1386	75	Negative	2.7e-27
								TRINITY_DN107373_c0_g1_i1	250	NC_003627.1 Maize chlorotic mottle virus genomic RNA	4437	100	563	617	-54	Positive	2.72e-22
								TRINITY_DN105061_c0_g1_i1	250	NC_003627.1 Maize chlorotic mottle virus genomic RNA	4437	100	1783	1810	-27	Positive	2.78e-07
								TRINITY_DN134036_c0_g1_i1	250	NC_003627.1 Maize chlorotic mottle virus genomic RNA	4437	98.148	3349	3402	-53	Positive	1.64e-19
								TRINITY_DN137496_c0_g1_i1	250	NC_003627.1 Maize chlorotic mottle virus genomic RNA	4437	87.5	3043	2980	63	Negative	5.93e-14
								TRINITY_DN104055_c0_g1_i1	250	NC_003627.1 Maize chlorotic mottle virus genomic RNA	4437	100	3011	3041	-30	Positive	5.97e-09
								TRINITY_DN45468_c0_g1_i1	249	NC_003627.1 Maize chlorotic mottle virus genomic RNA	4437	89.796	1262	1359	-97	Positive	1.61e-29
								TRINITY_DN97754_c0_g1_i1	249	NC_003627.1 Maize chlorotic mottle virus genomic RNA	4437	97.959	1762	1810	-48	Positive	2.73e-17
								TRINITY_DN111137_c0_g1_i1	249	NC_003627.1 Maize chlorotic mottle virus genomic RNA	4437	94.521	2549	2621	-72	Positive	1.25e-25
								TRINITY_DN28778_c2_g4_i2	248	NC_003627.1 Maize chlorotic mottle virus genomic RNA	4437	100	1018	928	90	Negative	2.62e-42
								TRINITY_DN74327_c0_g1_i1	246	NC_003627.1 Maize chlorotic mottle virus genomic RNA	4437	98.361	4174	4234	-60	Positive	5.74e-24
								TRINITY_DN128147_c0_g1_i1	246	NC_003627.1 Maize chlorotic mottle virus genomic RNA	4437	92.754	2549	2616	-67	Positive	3.46e-21
								TRINITY_DN81434_c0_g1_i1	245	NC_003627.1 Maize chlorotic mottle virus genomic RNA	4437	91.549	2224	2293	-69	Positive	1.24e-20
								TRINITY_DN13688_c0_g1_i2	245	NC_003627.1 Maize chlorotic mottle virus genomic RNA	4437	97.297	3003	2893	110	Negative	1.99e-48
								TRINITY_DN7702_c0_g1_i1	243	NC_003627.1 Maize chlorotic mottle virus genomic RNA	4437	96.364	856	910	-54	Positive	5.71e-19
								TRINITY_DN27919_c3_g3_i2	243	NC_003627.1 Maize chlorotic mottle virus genomic RNA	4437	100	4409	4307	102	Negative	5.47e-49
								TRINITY_DN5662_c0_g1_i1	240	NC_003627.1 Maize chlorotic mottle virus genomic RNA	4437	98.198	926	816	110	Negative	4.17e-50
								TRINITY_DN27451_c8_g2_i4	240	NC_003627.1 Maize chlorotic mottle virus genomic RNA	4437	96.212	145	14	131	Negative	8.9e-57
								TRINITY_DN27055_c7_g2_i1	240	NC_003627.1 Maize chlorotic mottle virus genomic RNA	4437	98.095	308	204	104	Negative	9.03e-47
								TRINITY_DN6789_c0_g2_i1	239	NC_003627.1 Maize chlorotic mottle virus genomic RNA	4437	97.458	4119	4235	-116	Positive	8.92e-52
								TRINITY_DN26536_c5_g1_i4	238	NC_003627.1 Maize chlorotic mottle virus genomic RNA	4437	96.25	1732	1811	-79	Positive	3.29e-31
								TRINITY_DN27489_c1_g1_i4	232	NC_003627.1 Maize chlorotic mottle virus genomic RNA	4437	94.366	2290	2220	70	Negative	1.5e-24
								TRINITY_DN27215_c5_g1_i1	232	NC_003627.1 Maize chlorotic mottle virus genomic RNA	4437	96.522	3037	2924	113	Negative	1.87e-48
								TRINITY_DN27578_c0_g2_i1	230	NC_003627.1 Maize chlorotic mottle virus genomic RNA	4437	98.571	4243	4175	68	Negative	1.9e-28
								TRINITY_DN3060_c0_g1_i1	225	NC_003627.1 Maize chlorotic mottle virus genomic RNA	4437	94.253	697	783	-86	Positive	8.59e-32
								TRINITY_DN45585_c0_g1_i1	222	NC_003627.1 Maize chlorotic mottle virus genomic RNA	4437	100	1810	1778	32	Negative	4.05e-10
								TRINITY_DN27451_c8_g2_i1	219	NC_003627.1 Maize chlorotic mottle virus genomic RNA	4437	95.789	217	123	94	Negative	6.4e-38
								TRINITY_DN12846_c0_g1_i1	214	NC_003627.1 Maize chlorotic mottle virus genomic RNA	4437	98.261	4238	4125	113	Negative	7.9e-52
								TRINITY_DN28326_c3_g1_i6	214	NC_003627.1 Maize chlorotic mottle virus genomic RNA	4437	97.531	229	309	-80	Positive	1.75e-33
								TRINITY_DN15230_c0_g1_i1	207	NC_003627.1 Maize chlorotic mottle virus genomic RNA	4437	97.03	310	210	100	Negative	5.96e-43
								TRINITY_DN27451_c8_g1_i2	206	NC_003627.1 Maize chlorotic mottle virus genomic RNA	4437	90.777	2682	2477	205	Negative	1.22e-74
								TRINITY_DN27760_c3_g1_i1	206	NC_003627.1 Maize chlorotic mottle virus genomic RNA	4437	95.575	814	925	-111	Positive	3.55e-45
								TRINITY_DN26573_c1_g1_i2	204	NC_003627.1 Maize chlorotic mottle virus genomic RNA	4437	93.151	67	139	-72	Positive	4.67e-24
								TRINITY_DN898_c0_g1_i1	203	NC_003627.1 Maize chlorotic mottle virus genomic RNA	4437	98.734	2949	3027	-78	Positive	4.58e-34
								TRINITY_DN19189_c0_g1_i1	203	NC_003627.1 Maize chlorotic mottle virus genomic RNA	4437	100	3425	3356	69	Negative	9.9e-31
								TRINITY_DN14511_c0_g1_i1	203	NC_003627.1 Maize chlorotic mottle virus genomic RNA	4437	97.917	1809	1762	47	Negative	7.82e-17
								Maize chlorotic mottle virus										Sugarcane mosaic virus									Maize streak virus
Researcher	Sample	Host	Total	Total	Unique_Contigs	Total	Contigs	Conting	Conting	Reference	Reference	%	Coordinates			Polarity	E	Conting	Conting	Reference	Reference	%	Coordinates		Polarity	E	Conting	Conting	Reference	Reference	%	Coordinates		Polarity	E
		Maize Leaf	Sequences	Contigs	matching to Virus	virus	Unmatch_to _PVGDB/NCBI		Length		Length	identity	Start	End			value		Length		Length	identity	Start	End		value		Length		Length	identity	Start	End		value
DNS	12		840531	16755	117	3	3047	TRINITY_DN5970_c0_g1_i1	368	NC_003627.1 Maize chlorotic mottle virus genomic RNA	4437	96.296	2792	2685	107	Negative	6.67e-45	TRINITY_DN3801_c0_g1_i1	463	NC_003398.1 Sugarcane mosaic virus	9596	82.159	3235	2787	Negative	6.02e-106	TRINITY_DN2734_c0_g1_i1	1787	NC_001346.2 Maize streak virus - A[Ama]	2689	98.301	1354	1	Negative	0
DNS	12							TRINITY_DN5959_c0_g1_i1	429	NC_003627.1 Maize chlorotic mottle virus genomic RNA	4437	98.165	916	1024	-108	Positive	1.01e-48	TRINITY_DN3586_c0_g1_i1	760	NC_003398.1 Sugarcane mosaic virus	9596	88.259	2052	2809	Positive	0	TRINITY_DN2734_c0_g1_i1	1787	NC_001346.2 Maize streak virus - A[Ama]	2689	98.157	2689	2256	Negative	0
DNS	12							TRINITY_DN5924_c0_g1_i1	291	NC_003627.1 Maize chlorotic mottle virus genomic RNA	4437	95.455	3627	3736	-109	Positive	6.7e-44	TRINITY_DN2807_c0_g1_i1	1064	NC_003398.1 Sugarcane mosaic virus	9596	86.608	3807	2787	Negative	0
DNS	12							TRINITY_DN1446_c0_g1_i1	501	NC_003627.1 Maize chlorotic mottle virus genomic RNA	4437	98.077	2555	2606	-51	Positive	1.23e-18	TRINITY_DN6787_c0_g1_i1	1335	NC_003398.1 Sugarcane mosaic virus	9596	91.243	1494	160	Negative	0
DNS	12							TRINITY_DN1474_c0_g1_i1	250	NC_003627.1 Maize chlorotic mottle virus genomic RNA	4437	97.727	221	308	-87	Positive	2.66e-37	TRINITY_DN3427_c0_g1_i1	388	NC_003398.1 Sugarcane mosaic virus	9596	82.078	3285	3666	Positive	8.56e-89
DNS	12							TRINITY_DN3006_c0_g1_i1	279	NC_003627.1 Maize chlorotic mottle virus genomic RNA	4437	97.059	557	490	67	Negative	3.94e-26	TRINITY_DN6096_c0_g1_i1	350	NC_003398.1 Sugarcane mosaic virus	9596	91.209	1843	1571	Negative	2.7e-103
DNS	12							TRINITY_DN4393_c0_g1_i1	263	NC_003627.1 Maize chlorotic mottle virus genomic RNA	4437	91.954	4120	4035	85	Negative	7.94e-28	TRINITY_DN1930_c0_g1_i1	2706	NC_003398.1 Sugarcane mosaic virus	9596	84.539	4573	7276	Positive	0
DNS	12							TRINITY_DN2174_c0_g1_i1	657	NC_003627.1 Maize chlorotic mottle virus genomic RNA	4437	98.864	4327	4414	-87	Positive	1.59e-38	TRINITY_DN1961_c0_g1_i1	1956	NC_003398.1 Sugarcane mosaic virus	9596	88.156	8613	9278	Positive	0
								TRINITY_DN6624_c0_g1_i1	271	NC_003627.1 Maize chlorotic mottle virus genomic RNA	4437	100	1785	1813	-28	Positive	8.44e-08
								TRINITY_DN8160_c0_g1_i1	299	NC_003627.1 Maize chlorotic mottle virus genomic RNA	4437	96.429	4212	4322	-110	Positive	1.15e-46
								TRINITY_DN2220_c0_g2_i2	713	NC_003627.1 Maize chlorotic mottle virus genomic RNA	4437	95.2	1705	1581	124	Negative	1.02e-50
								TRINITY_DN2267_c6_g3_i3	230	NC_003627.1 Maize chlorotic mottle virus genomic RNA	4437	100	3430	3478	-48	Positive	5.37e-19
								TRINITY_DN2286_c2_g1_i2	236	NC_003627.1 Maize chlorotic mottle virus genomic RNA	4437	97.297	811	921	-110	Positive	1.9e-48
								TRINITY_DN2276_c8_g1_i2	278	NC_003627.1 Maize chlorotic mottle virus genomic RNA	4437	97.778	3800	3844	-44	Positive	5.15e-15
								TRINITY_DN2205_c0_g1_i3	758	NC_003627.1 Maize chlorotic mottle virus genomic RNA	4437	98.734	2474	2552	-78	Positive	1.86e-33
								TRINITY_DN2280_c2_g1_i2	236	NC_003627.1 Maize chlorotic mottle virus genomic RNA	4437	97.03	1641	1541	100	Negative	6.9e-43
								TRINITY_DN2221_c0_g1_i1	602	NC_003627.1 Maize chlorotic mottle virus genomic RNA	4437	97.436	2953	3030	-77	Positive	2.45e-31
								TRINITY_DN2281_c10_g1_i1	236	NC_003627.1 Maize chlorotic mottle virus genomic RNA	4437	95.402	835	921	-86	Positive	1.95e-33
								TRINITY_DN2393_c10_g1_i14	570	NC_003627.1 Maize chlorotic mottle virus genomic RNA	4437	94.828	2649	2534	115	Negative	8.15e-46
								TRINITY_DN2317_c5_g2_i1	888	NC_003627.1 Maize chlorotic mottle virus genomic RNA	4437	96.364	2983	3037	-54	Positive	2.23e-18
								TRINITY_DN2322_c3_g1_i1	224	NC_003627.1 Maize chlorotic mottle virus genomic RNA	4437	94.382	2798	2710	88	Negative	6.61e-33
								TRINITY_DN2324_c3_g1_i1	204	NC_003627.1 Maize chlorotic mottle virus genomic RNA	4437	94.118	3660	3725	-65	Positive	2.17e-22
								TRINITY_DN2318_c3_g2_i3	246	NC_003627.1 Maize chlorotic mottle virus genomic RNA	4437	97.561	1341	1381	-40	Positive	7.54e-13
								TRINITY_DN2309_c1_g1_i22	592	NC_003627.1 Maize chlorotic mottle virus genomic RNA	4437	97.368	2239	2202	37	Negative	8.9e-11
								TRINITY_DN2323_c1_g1_i3	501	NC_003627.1 Maize chlorotic mottle virus genomic RNA	4437	93.458	320	215	105	Negative	4.31e-38
								TRINITY_DN2315_c2_g1_i3	275	NC_003627.1 Maize chlorotic mottle virus genomic RNA	4437	100	985	1023	-38	Positive	2.37e-13
								TRINITY_DN2351_c5_g1_i1	246	NC_003627.1 Maize chlorotic mottle virus genomic RNA	4437	100	3429	3380	49	Negative	1.61e-19
								TRINITY_DN2310_c2_g1_i9	299	NC_003627.1 Maize chlorotic mottle virus genomic RNA	4437	88.158	2859	2786	73	Negative	9.25e-18
								TRINITY_DN2308_c4_g1_i1	251	NC_003627.1 Maize chlorotic mottle virus genomic RNA	4437	98.925	2741	2649	92	Polarity	9.55e-42
								TRINITY_DN2308_c4_g1_i2	365	NC_003627.1 Maize chlorotic mottle virus genomic RNA	4437	96.552	2793	2649	144	Negative	8.31e-64
								TRINITY_DN2308_c4_g1_i4	221	NC_003627.1 Maize chlorotic mottle virus genomic RNA	4437	97.059	2784	2649	135	Negative	1.04e-60
								TRINITY_DN2308_c4_g1_i5	374	NC_003627.1 Maize chlorotic mottle virus genomic RNA	4437	96.104	2801	2649	152	Negative	1.42e-66
								TRINITY_DN2301_c3_g3_i3	601	NC_003627.1 Maize chlorotic mottle virus genomic RNA	4437	94.737	3026	2932	94	Negative	8.73e-36
								TRINITY_DN2790_c0_g1_i1	294	NC_003627.1 Maize chlorotic mottle virus genomic RNA	4437	96.774	4036	4097	-61	Positive	9.02e-23
								TRINITY_DN1840_c0_g1_i1	216	NC_003627.1 Maize chlorotic mottle virus genomic RNA	4437	100	625	515	110	Negative	1.71e-53
								TRINITY_DN1851_c0_g1_i2	204	NC_003627.1 Maize chlorotic mottle virus genomic RNA	4437	93.939	4237	4173	64	Negative	1.01e-20
								TRINITY_DN1891_c0_g1_i1	276	NC_003627.1 Maize chlorotic mottle virus genomic RNA	4437	93.162	3731	3616	115	Negative	8.19e-43
								TRINITY_DN1836_c0_g1_i1	204	NC_003627.1 Maize chlorotic mottle virus genomic RNA	4437	99.123	1019	906	113	Negative	1.61e-53
								TRINITY_DN1836_c0_g1_i2	313	NC_003627.1 Maize chlorotic mottle virus genomic RNA	4437	100	1002	906	96	Negative	1.56e-45
								TRINITY_DN349_c0_g1_i1	292	NC_003627.1 Maize chlorotic mottle virus genomic RNA	4437	98.592	806	876	-70	Positive	1.91e-29
								TRINITY_DN4515_c0_g1_i1	274	NC_003627.1 Maize chlorotic mottle virus genomic RNA	4437	93.204	2429	2329	100	Negative	1.06e-36
								TRINITY_DN5433_c0_g1_i1	227	NC_003627.1 Maize chlorotic mottle virus genomic RNA	4437	97.727	779	822	-43	Positive	1.48e-14
								TRINITY_DN1681_c0_g1_i1	246	NC_003627.1 Maize chlorotic mottle virus genomic RNA	4437	98.649	569	642	-73	Positive	3.41e-31
								TRINITY_DN2483_c4_g1_i1	207	NC_003627.1 Maize chlorotic mottle virus genomic RNA	4437	98.113	4102	4207	-105	Positive	2.13e-47
								TRINITY_DN2483_c4_g1_i2	203	NC_003627.1 Maize chlorotic mottle virus genomic RNA	4437	98.98	4307	4404	-97	Positive	4.51e-44
								TRINITY_DN2483_c4_g1_i3	245	NC_003627.1 Maize chlorotic mottle virus genomic RNA	4437	97.619	3627	3710	-83	Positive	4.36e-35
								TRINITY_DN2483_c4_g1_i4	241	NC_003627.1 Maize chlorotic mottle virus genomic RNA	4437	100	4307	4398	-91	Positive	7.06e-43
								TRINITY_DN2483_c4_g1_i5	277	NC_003627.1 Maize chlorotic mottle virus genomic RNA	4437	91.525	3879	3996	-117	Positive	4.95e-40
								TRINITY_DN2483_c4_g1_i6	220	NC_003627.1 Maize chlorotic mottle virus genomic RNA	4437	98.077	4307	4410	-103	Positive	2.95e-46
								TRINITY_DN2483_c4_g1_i7	226	NC_003627.1 Maize chlorotic mottle virus genomic RNA	4437	99.057	4307	4412	-105	Positive	5.05e-49
								TRINITY_DN2483_c4_g1_i8	1002	NC_003627.1 Maize chlorotic mottle virus genomic RNA	4437	96.413	3495	4414	-919	Positive	0
								TRINITY_DN2483_c4_g1_i9	972	NC_003627.1 Maize chlorotic mottle virus genomic RNA	4437	96.681	3495	4398	-903	Positive	0
								TRINITY_DN2483_c4_g1_i11	201	NC_003627.1 Maize chlorotic mottle virus genomic RNA	4437	93.333	4009	4112	-103	Positive	2.09e-37
								TRINITY_DN2483_c4_g1_i12	482	NC_003627.1 Maize chlorotic mottle virus genomic RNA	4437	95.707	3495	3890	-395	Positive	0
								TRINITY_DN2483_c4_g1_i13	1011	NC_003627.1 Maize chlorotic mottle virus genomic RNA	4437	96.732	3495	4412	-917	Positive	0
								TRINITY_DN2483_c4_g1_i14	240	NC_003627.1 Maize chlorotic mottle virus genomic RNA	4437	96.269	3974	4107	-133	Positive	2.47e-57
								TRINITY_DN2483_c4_g1_i15	227	NC_003627.1 Maize chlorotic mottle virus genomic RNA	4437	96.117	3769	3871	-102	Positive	2.38e-42
								TRINITY_DN2483_c4_g1_i16	204	NC_003627.1 Maize chlorotic mottle virus genomic RNA	4437	99.099	4102	4212	-110	Positive	7.48e-52
								TRINITY_DN2478_c6_g5_i1	220	NC_003627.1 Maize chlorotic mottle virus genomic RNA	4437	93.204	4111	4213	-102	Positive	8.32e-37
								TRINITY_DN2408_c1_g2_i2	523	NC_003627.1 Maize chlorotic mottle virus genomic RNA	4437	100	921	888	33	Negative	2.81e-10
								TRINITY_DN2490_c18_g1_i3	281	NC_003627.1 Maize chlorotic mottle virus genomic RNA	4437	98.958	2966	3061	-95	Positive	2.32e-43
								TRINITY_DN2466_c4_g1_i11	430	NC_003627.1 Maize chlorotic mottle virus genomic RNA	4437	96.721	2566	2626	-60	Positive	4.87e-22
								TRINITY_DN2450_c1_g1_i1	217	NC_003627.1 Maize chlorotic mottle virus genomic RNA	4437	96.552	3715	3629	86	Negative	1.37e-34
								TRINITY_DN2474_c0_g1_i1	238	NC_003627.1 Maize chlorotic mottle virus genomic RNA	4437	95.122	2354	2273	81	Negative	1.18e-30
								TRINITY_DN2434_c31_g1_i1	225	NC_003627.1 Maize chlorotic mottle virus genomic RNA	4437	98.413	3430	3369	61	Negative	1.45e-24
								TRINITY_DN2434_c31_g2_i1	210	NC_003627.1 Maize chlorotic mottle virus genomic RNA	4437	98.347	656	537	119	Negative	3.57e-55
								TRINITY_DN2434_c31_g2_i3	230	NC_003627.1 Maize chlorotic mottle virus genomic RNA	4437	98.148	1888	1781	107	Negative	1.85e-48
								TRINITY_DN2434_c31_g2_i4	225	NC_003627.1 Maize chlorotic mottle virus genomic RNA	4437	94.845	1345	1249	96	Negative	2.37e-37
								TRINITY_DN2434_c31_g3_i1	236	NC_003627.1 Maize chlorotic mottle virus genomic RNA	4437	93.407	577	490	87	Negative	3.26e-31
								TRINITY_DN2434_c31_g2_i5	3491	NC_003627.1 Maize chlorotic mottle virus genomic RNA	4437	96.536	3391	14	3377	Negative	0
								TRINITY_DN2434_c31_g2_i6	218	NC_003627.1 Maize chlorotic mottle virus genomic RNA	4437	94.737	2191	2078	113	Negative	3.78e-45
								TRINITY_DN2434_c31_g2_i7	3726	NC_003627.1 Maize chlorotic mottle virus genomic RNA	4437	96.576	3634	14	3620	Negative	0
								TRINITY_DN2434_c31_g2_i8	222	NC_003627.1 Maize chlorotic mottle virus genomic RNA	4437	94.643	2189	2078	111	Negative	4.98e-44
								TRINITY_DN2434_c31_g2_i9	3716	NC_003627.1 Maize chlorotic mottle virus genomic RNA	4437	96.582	3729	14	3715	Negative	0
								TRINITY_DN2434_c31_g2_i10	261	NC_003627.1 Maize chlorotic mottle virus genomic RNA	4437	98.473	919	789	130	Negative	3.49e-61
								TRINITY_DN2434_c31_g4_i1	207	NC_003627.1 Maize chlorotic mottle virus genomic RNA	4437	97.333	696	622	74	Negative	3.64e-30
								TRINITY_DN2434_c31_g2_i11	3277	NC_003627.1 Maize chlorotic mottle virus genomic RNA	4437	96.299	3173	14	3159	Negative	0
								TRINITY_DN2434_c31_g5_i1	211	NC_003627.1 Maize chlorotic mottle virus genomic RNA	4437	95.385	1806	1742	64	Negative	6.27e-23
								TRINITY_DN2434_c31_g2_i12	217	NC_003627.1 Maize chlorotic mottle virus genomic RNA	4437	96.296	1457	1350	107	Negative	3.76e-45
								TRINITY_DN2434_c31_g2_i13	2930	NC_003627.1 Maize chlorotic mottle virus genomic RNA	4437	96.449	2857	14	2843	Negative	0
								TRINITY_DN2434_c31_g2_i14	254	NC_003627.1 Maize chlorotic mottle virus genomic RNA	4437	96.045	3311	3135	176	Negative	1.98e-78
								TRINITY_DN2434_c31_g2_i15	224	NC_003627.1 Maize chlorotic mottle virus genomic RNA	4437	96.8	1474	1350	124	Negative	1.38e-54
								TRINITY_DN2414_c4_g4_i2	261	NC_003627.1 Maize chlorotic mottle virus genomic RNA	4437	96	1829	1903	-74	Positive	2.19e-28
								TRINITY_DN2476_c5_g1_i1	276	NC_003627.1 Maize chlorotic mottle virus genomic RNA	4437	94.444	1541	1702	-161	Positive	1.02e-66
								TRINITY_DN2476_c5_g1_i2	221	NC_003627.1 Maize chlorotic mottle virus genomic RNA	4437	91.429	1541	1680	-139	Positive	4.93e-49
								TRINITY_DN2476_c5_g1_i3	221	NC_003627.1 Maize chlorotic mottle virus genomic RNA	4437	90.526	1608	1702	-94	Positive	1.41e-29
								TRINITY_DN2439_c4_g2_i2	233	NC_003627.1 Maize chlorotic mottle virus genomic RNA	4437	94.872	3027	2950	77	Negative	6.95e-28
								TRINITY_DN2403_c7_g3_i1	238	NC_003627.1 Maize chlorotic mottle virus genomic RNA	4437	92.857	4156	4237	-81	Positive	2.56e-27
								TRINITY_DN2413_c0_g1_i1	301	NC_003627.1 Maize chlorotic mottle virus genomic RNA	4437	96.226	1811	1760	51	Negative	3.35e-17
								TRINITY_DN2422_c4_g1_i9	265	NC_003627.1 Maize chlorotic mottle virus genomic RNA	4437	96.429	2926	3009	-83	Positive	2.21e-33
								TRINITY_DN7021_c0_g1_i1	316	NC_003627.1 Maize chlorotic mottle virus genomic RNA	4437	96.296	1641	1561	80	Negative	1.24e-31
								TRINITY_DN7049_c0_g1_i1	356	NC_003627.1 Maize chlorotic mottle virus genomic RNA	4437	97.647	3343	3427	-84	Positive	1.81e-35
								TRINITY_DN7004_c0_g1_i1	253	NC_003627.1 Maize chlorotic mottle virus genomic RNA	4437	97.674	529	571	-42	Positive	6.01e-14
								TRINITY_DN1041_c0_g1_i1	279	NC_003627.1 Maize chlorotic mottle virus genomic RNA	4437	95.946	3734	3661	73	Negative	8.46e-28
								TRINITY_DN1242_c0_g1_i2	244	NC_003627.1 Maize chlorotic mottle virus genomic RNA	4437	95.946	128	55	73	Negative	7.31e-28
								TRINITY_DN4915_c0_g1_i1	275	NC_003627.1 Maize chlorotic mottle virus genomic RNA	4437	97.778	894	805	89	Negative	2.28e-38
								TRINITY_DN4900_c0_g1_i1	546	NC_003627.1 Maize chlorotic mottle virus genomic RNA	4437	96.639	620	738	-118	Positive	2.78e-50
								TRINITY_DN5720_c0_g1_i1	393	NC_003627.1 Maize chlorotic mottle virus genomic RNA	4437	96.203	834	912	-78	Positive	2.03e-30
								TRINITY_DN35_c0_g2_i1	276	NC_003627.1 Maize chlorotic mottle virus genomic RNA	4437	98.901	3311	3401	-90	Positive	1.37e-40
								TRINITY_DN549_c0_g1_i1	266	NC_003627.1 Maize chlorotic mottle virus genomic RNA	4437	95.683	1964	1826	138	Negative	5.95e-59
								TRINITY_DN549_c0_g1_i2	242	NC_003627.1 Maize chlorotic mottle virus genomic RNA	4437	96.262	1932	1826	106	Negative	1.52e-44
								TRINITY_DN505_c0_g1_i1	351	NC_003627.1 Maize chlorotic mottle virus genomic RNA	4437	92.079	2756	2855	-99	Positive	8.32e-34
								TRINITY_DN3183_c0_g1_i1	258	NC_003627.1 Maize chlorotic mottle virus genomic RNA	4437	93.151	2972	3044	-72	Positive	7.83e-23
								TRINITY_DN2677_c0_g1_i1	284	NC_003627.1 Maize chlorotic mottle virus genomic RNA	4437	96.875	2503	2598	-95	Positive	5.08e-40
								TRINITY_DN4448_c0_g1_i1	331	NC_003627.1 Maize chlorotic mottle virus genomic RNA	4437	96.939	3030	2933	97	Negative	4.64e-41
								TRINITY_DN1956_c0_g1_i2	369	NC_003627.1 Maize chlorotic mottle virus genomic RNA	4437	94.118	1712	1578	134	Negative	3.07e-53
								TRINITY_DN712_c0_g1_i1	205	NC_003627.1 Maize chlorotic mottle virus genomic RNA	4437	98.438	3012	2949	63	Negative	1.01e-25
								Maize chlorotic mottle virus										Sugarcane mosaic virus									Maize streak virus									Maize dwarf mosaic virus									Maize yellow dwarf virus-RMV2
Researcher	Sample	Host	Total	Total	Unique_Contigs	Total	Contigs	Conting	Conting	Reference	Reference	%	Coordinates			Polarity	E	Conting	Conting	Reference	Reference	%	Coordinates		Polarity	E	Conting	Conting	Reference	Reference	%	Coordinates		Polarity	E	Conting	Conting	Reference	Reference	%	Coordinates		Polarity	E	Conting	Conting	Reference	Reference	%
		Maize Leaf	Sequences	Contigs	matching to Virus	virus	Unmatch_to _PVGDB/NCBI		Length		Length	identity	Start	End			value		Length		Length	identity	Start	End		value		Length		Length	identity	Start	End		value		Length		Length	identity	Start	End		value		Length		Length	identity
DNS	13		1046670	12327	127	5	3433	TRINITY_DN964_c1_g1_i1	242	NC_003627.1 Maize chlorotic mottle virus genomic RNA	4437	94.949	2798	2701	97	Negative	7.14e-38	TRINITY_DN480_c0_g1_i1	401	NC_003398.1 Sugarcane mosaic virus	9596	93.467	9277	8880	Negative	2.2e-169	TRINITY_DN1308_c0_g1_i1	1411	NC_001346.2 Maize streak virus - A[Ama]	2689	96.532	2649	1237	Negative	0	TRINITY_DN1296_c0_g1_i1	1930	NC_003377.1 Maize dwarf mosaic virus	9515	74.983	2208	720	Negative	0	TRINITY_DN8171_c0_g1_i1	1086	NC_029990.1 Maize yellow dwarf virus-RMV2	5625	95.764
DNS	13							TRINITY_DN982_c0_g2_i1	478	NC_003627.1 Maize chlorotic mottle virus genomic RNA	4437	95.536	4416	4307	109	Negative	8.77e-45	TRINITY_DN1368_c4_g1_i1	2624	NC_003398.1 Sugarcane mosaic virus	9596	90.116	9387	8611	Negative	0	TRINITY_DN1308_c0_g2_i1	1326	NC_001346.2 Maize streak virus - A[Ama]	2689	97.859	1	1261	Positive	0	TRINITY_DN1296_c0_g1_i2	2095	NC_003377.1 Maize dwarf mosaic virus	9515	74.287	2451	720	Negative	0	TRINITY_DN6998_c0_g1_i1	205	NC_029990.1 Maize yellow dwarf virus-RMV2	5625	93.659
DNS	13							TRINITY_DN909_c0_g1_i2	231	NC_003627.1 Maize chlorotic mottle virus genomic RNA	4437	95.312	2332	2205	127	Negative	6.64e-53	TRINITY_DN1368_c4_g1_i3	6923	NC_003398.1 Sugarcane mosaic virus	9596	79.959	8474	2580	Negative	0	TRINITY_DN1308_c0_g2_i1	1326	NC_001346.2 Maize streak virus - A[Ama]	2689	98.462	2625	2689	Polarity	1.99e-25										TRINITY_DN6398_c0_g1_i1	585	NC_029990.1 Maize yellow dwarf virus-RMV2	5625	96.239
DNS	13							TRINITY_DN954_c0_g1_i1	203	NC_003627.1 Maize chlorotic mottle virus genomic RNA	4437	96.825	2698	2636	62	Negative	1.67e-23	TRINITY_DN1368_c4_g1_i3	6923	NC_003398.1 Sugarcane mosaic virus	9596	90.39	9387	8619	Negative	0	TRINITY_DN1308_c0_g1_i2	1411	NC_001346.2 Maize streak virus - A[Ama]	2689	96.559	2602	1237	Negative	0										TRINITY_DN7039_c0_g1_i1	823	NC_029990.1 Maize yellow dwarf virus-RMV2	5625	97.813
DNS	13							TRINITY_DN3042_c0_g1_i1	607	NC_003627.1 Maize chlorotic mottle virus genomic RNA	4437	92.929	1992	2089	-97	Positive	4.1e-34	TRINITY_DN6160_c0_g1_i1	280	NC_003398.1 Sugarcane mosaic virus	9596	91.667	1382	1107	Negative	9.82e-107	TRINITY_DN1308_c0_g1_i2	1411	NC_001346.2 Maize streak virus - A[Ama]	2689	98.214	2625	2680	Positive	2.14e-20										TRINITY_DN5381_c0_g1_i1	257	NC_029990.1 Maize yellow dwarf virus-RMV2	5625	95.72
DNS	13							TRINITY_DN4823_c0_g1_i1	267	NC_003627.1 Maize chlorotic mottle virus genomic RNA	4437	98.276	921	864	57	Negative	2.92e-22										TRINITY_DN1308_c0_g1_i3	1507	NC_001346.2 Maize streak virus - A[Ama]	2689	96.471	2649	1318	Negative	0										TRINITY_DN6813_c0_g1_i1	328	NC_029990.1 Maize yellow dwarf virus-RMV2	5625	98.78
DNS	13							TRINITY_DN1134_c0_g1_i1	225	NC_003627.1 Maize chlorotic mottle virus genomic RNA	4437	100	910	1027	-117	Positive	2.3e-57										TRINITY_DN1308_c0_g1_i4	1644	NC_001346.2 Maize streak virus - A[Ama]	2689	96.554	2649	1286	Negative	0										TRINITY_DN1584_c0_g1_i1	2136	NC_029990.1 Maize yellow dwarf virus-RMV2	5625	97.519
DNS	13							TRINITY_DN1134_c0_g1_i2	228	NC_003627.1 Maize chlorotic mottle virus genomic RNA	4437	100	910	1030	-120	Positive	5.03e-59										TRINITY_DN9024_c0_g1_i1	213	NC_001346.2 Maize streak virus - A[Ama]	2689	100	1296	1345	Positive	1.37e-19
								TRINITY_DN1134_c0_g1_i3	211	NC_003627.1 Maize chlorotic mottle virus genomic RNA	4437	98.319	910	1028	-118	Positive	4.64e-54
								TRINITY_DN1145_c0_g2_i1	347	NC_003627.1 Maize chlorotic mottle virus genomic RNA	4437	96.552	3623	3537	86	Negative	6.35e-35
								TRINITY_DN1136_c0_g1_i1	264	NC_003627.1 Maize chlorotic mottle virus genomic RNA	4437	97.059	781	882	-101	Positive	2.17e-43
								TRINITY_DN1120_c0_g1_i1	232	NC_003627.1 Maize chlorotic mottle virus genomic RNA	4437	91.2	3467	3343	124	Negative	6.77e-43
								TRINITY_DN3800_c0_g1_i1	259	NC_003627.1 Maize chlorotic mottle virus genomic RNA	4437	98	2765	2814	-49	Positive	7.92e-18
								TRINITY_DN4050_c0_g1_i1	261	NC_003627.1 Maize chlorotic mottle virus genomic RNA	4437	98.718	654	577	77	Negative	2.17e-33
								TRINITY_DN820_c0_g1_i1	266	NC_003627.1 Maize chlorotic mottle virus genomic RNA	4437	100	4045	4004	41	Negative	4.91e-15
								TRINITY_DN884_c0_g1_i1	267	NC_003627.1 Maize chlorotic mottle virus genomic RNA	4437	97.059	2829	2660	169	Negative	7.52e-78
								TRINITY_DN884_c0_g1_i2	299	NC_003627.1 Maize chlorotic mottle virus genomic RNA	4437	97.059	2795	2660	135	Negative	1.45e-60
								TRINITY_DN884_c0_g1_i3	301	NC_003627.1 Maize chlorotic mottle virus genomic RNA	4437	96.899	2788	2660	128	Negative	1.14e-56
								TRINITY_DN214_c0_g1_i1	328	NC_003627.1 Maize chlorotic mottle virus genomic RNA	4437	95.652	870	915	-45	Positive	7.96e-14
								TRINITY_DN8673_c0_g1_i1	265	NC_003627.1 Maize chlorotic mottle virus genomic RNA	4437	100	654	621	33	Negative	1.37e-10
								TRINITY_DN1351_c4_g1_i5	250	NC_003627.1 Maize chlorotic mottle virus genomic RNA	4437	95.918	835	932	-97	Positive	1.59e-39
								TRINITY_DN1372_c6_g4_i1	948	NC_003627.1 Maize chlorotic mottle virus genomic RNA	4437	95.238	1777	1880	-103	Positive	1.39e-40
								TRINITY_DN1372_c6_g4_i1	948	NC_003627.1 Maize chlorotic mottle virus genomic RNA	4437	95.238	1646	1563	83	Negative	3.91e-31
								TRINITY_DN1319_c4_g2_i1	1457	NC_003627.1 Maize chlorotic mottle virus genomic RNA	4437	92.593	151	204	-53	Positive	2.88e-14
								TRINITY_DN1319_c4_g6_i2	638	NC_003627.1 Maize chlorotic mottle virus genomic RNA	4437	100	1022	940	82	Negative	2e-37
								TRINITY_DN1375_c1_g1_i1	217	NC_003627.1 Maize chlorotic mottle virus genomic RNA	4437	95.349	630	588	42	Negative	8.49e-12
								TRINITY_DN1375_c7_g2_i3	385	NC_003627.1 Maize chlorotic mottle virus genomic RNA	4437	94.355	1353	1230	123	Negative	8.98e-49
								TRINITY_DN1375_c7_g2_i4	595	NC_003627.1 Maize chlorotic mottle virus genomic RNA	4437	94.231	1353	1250	103	Negative	3.99e-39
								TRINITY_DN1375_c13_g1_i1	256	NC_003627.1 Maize chlorotic mottle virus genomic RNA	4437	97.222	381	416	-35	Positive	4.74e-10
								TRINITY_DN1365_c18_g1_i1	315	NC_003627.1 Maize chlorotic mottle virus genomic RNA	4437	95.954	1420	1592	-172	Positive	4.18e-76
								TRINITY_DN1368_c2_g2_i1	214	NC_003627.1 Maize chlorotic mottle virus genomic RNA	4437	95	150	11	139	Negative	6.06e-58
								TRINITY_DN1368_c2_g2_i2	233	NC_003627.1 Maize chlorotic mottle virus genomic RNA	4437	97.425	243	11	232	Negative	2.87e-111
								TRINITY_DN1368_c2_g2_i3	242	NC_003627.1 Maize chlorotic mottle virus genomic RNA	4437	96.296	198	118	80	Negative	9.31e-32
								TRINITY_DN1305_c0_g5_i1	370	NC_003627.1 Maize chlorotic mottle virus genomic RNA	4437	100	2457	2428	29	Negative	3.28e-08
								TRINITY_DN1376_c19_g1_i1	248	NC_003627.1 Maize chlorotic mottle virus genomic RNA	4437	95.161	571	448	123	Negative	1.2e-50
								TRINITY_DN1376_c19_g1_i2	308	NC_003627.1 Maize chlorotic mottle virus genomic RNA	4437	97.222	3591	3448	143	Negative	5.36e-65
								TRINITY_DN1376_c19_g1_i3	281	NC_003627.1 Maize chlorotic mottle virus genomic RNA	4437	95.676	2301	2118	183	Negative	1.32e-80
								TRINITY_DN1376_c19_g1_i4	226	NC_003627.1 Maize chlorotic mottle virus genomic RNA	4437	95.575	2084	1972	112	Negative	3.04e-46
								TRINITY_DN1376_c19_g1_i5	1066	NC_003627.1 Maize chlorotic mottle virus genomic RNA	4437	97.181	3735	2991	744	Negative	0
								TRINITY_DN1376_c19_g1_i6	352	NC_003627.1 Maize chlorotic mottle virus genomic RNA	4437	93.627	651	448	203	Negative	3.62e-82
								TRINITY_DN1376_c19_g1_i7	279	NC_003627.1 Maize chlorotic mottle virus genomic RNA	4437	97.826	1028	892	136	Negative	8.06e-63
								TRINITY_DN1376_c19_g1_i8	357	NC_003627.1 Maize chlorotic mottle virus genomic RNA	4437	97.101	416	210	206	Negative	1.29e-96
								TRINITY_DN1376_c19_g1_i9	234	NC_003627.1 Maize chlorotic mottle virus genomic RNA	4437	96.512	930	760	170	Negative	8.41e-77
								TRINITY_DN1376_c19_g1_i10	301	NC_003627.1 Maize chlorotic mottle virus genomic RNA	4437	95.27	3172	3025	147	Negative	3.15e-62
								TRINITY_DN1376_c19_g1_i11	519	NC_003627.1 Maize chlorotic mottle virus genomic RNA	4437	96.977	413	17	396	Negative	0
								TRINITY_DN1376_c19_g1_i12	6502	NC_003627.1 Maize chlorotic mottle virus genomic RNA	4437	96.649	4410	174	4236	Negative	0
								TRINITY_DN1376_c19_g1_i14	3647	NC_003627.1 Maize chlorotic mottle virus genomic RNA	4437	96.527	3715	174	3541	Negative	0
								TRINITY_DN1376_c19_g1_i15	1388	NC_003627.1 Maize chlorotic mottle virus genomic RNA	4437	98.013	4410	3958	452	Negative	0
								TRINITY_DN1376_c19_g1_i16	264	NC_003627.1 Maize chlorotic mottle virus genomic RNA	4437	98.065	914	760	154	Negative	7.48e-73
								TRINITY_DN1376_c19_g1_i17	265	NC_003627.1 Maize chlorotic mottle virus genomic RNA	4437	97.143	785	612	173	Negative	4.46e-80
								TRINITY_DN1376_c19_g1_i18	256	NC_003627.1 Maize chlorotic mottle virus genomic RNA	4437	95.833	3168	3025	143	Negative	9.49e-62
								TRINITY_DN1376_c19_g1_i19	4324	NC_003627.1 Maize chlorotic mottle virus genomic RNA	4437	96.573	4317	174	4143	Negative	0
								TRINITY_DN1376_c19_g1_i20	3645	NC_003627.1 Maize chlorotic mottle virus genomic RNA	4437	96.519	3734	174	3560	Negative	0
								TRINITY_DN1376_c19_g1_i21	243	NC_003627.1 Maize chlorotic mottle virus genomic RNA	4437	94.872	2088	1972	116	Negative	9.15e-47
								TRINITY_DN1376_c19_g1_i22	3649	NC_003627.1 Maize chlorotic mottle virus genomic RNA	4437	96.542	3730	174	3556	Negative	0
								TRINITY_DN1376_c19_g1_i23	277	NC_003627.1 Maize chlorotic mottle virus genomic RNA	4437	97.122	1813	1675	138	Negative	2.87e-62
								TRINITY_DN1376_c19_g3_i1	236	NC_003627.1 Maize chlorotic mottle virus genomic RNA	4437	98.387	3051	2991	60	Negative	5.49e-24
								TRINITY_DN1376_c19_g1_i25	260	NC_003627.1 Maize chlorotic mottle virus genomic RNA	4437	96.667	196	17	179	Negative	9.38e-82
								TRINITY_DN1376_c19_g1_i26	4289	NC_003627.1 Maize chlorotic mottle virus genomic RNA	4437	96.581	4326	174	4152	Negative	0
								TRINITY_DN1376_c19_g1_i27	375	NC_003627.1 Maize chlorotic mottle virus genomic RNA	4437	96.744	423	210	213	Negative	8.14e-99
								TRINITY_DN1376_c19_g1_i28	296	NC_003627.1 Maize chlorotic mottle virus genomic RNA	4437	94.309	1114	993	121	Negative	8.77e-48
								TRINITY_DN1376_c19_g1_i29	243	NC_003627.1 Maize chlorotic mottle virus genomic RNA	4437	96.639	2793	2675	118	Negative	3.27e-51
								TRINITY_DN1376_c19_g1_i30	333	NC_003627.1 Maize chlorotic mottle virus genomic RNA	4437	96.804	1474	1256	218	Negative	1.19e-101
								TRINITY_DN1376_c19_g1_i31	216	NC_003627.1 Maize chlorotic mottle virus genomic RNA	4437	97.101	4095	3958	137	Negative	7.87e-62
								TRINITY_DN1376_c19_g1_i32	280	NC_003627.1 Maize chlorotic mottle virus genomic RNA	4437	96.939	1986	1791	195	Negative	1.3e-90
								TRINITY_DN1376_c19_g1_i33	3791	NC_003627.1 Maize chlorotic mottle virus genomic RNA	4437	97.183	4410	2991	1419	Negative	0
								TRINITY_DN1376_c19_g1_i34	219	NC_003627.1 Maize chlorotic mottle virus genomic RNA	4437	97.037	1809	1675	134	Negative	3.72e-60
								TRINITY_DN1376_c19_g1_i35	268	NC_003627.1 Maize chlorotic mottle virus genomic RNA	4437	96.791	634	448	186	Negative	1.25e-85
								TRINITY_DN1376_c19_g1_i36	3891	NC_003627.1 Maize chlorotic mottle virus genomic RNA	4437	96.481	3952	174	3778	Negative	0
								TRINITY_DN1376_c19_g1_i37	404	NC_003627.1 Maize chlorotic mottle virus genomic RNA	4437	97.166	2620	2374	246	Negative	3.98e-117
								TRINITY_DN1376_c19_g1_i38	4208	NC_003627.1 Maize chlorotic mottle virus genomic RNA	4437	96.554	4265	174	4091	Negative	0
								TRINITY_DN1376_c19_g1_i39	218	NC_003627.1 Maize chlorotic mottle virus genomic RNA	4437	100	1015	892	123	Negative	1.03e-60
								TRINITY_DN1376_c19_g1_i41	213	NC_003627.1 Maize chlorotic mottle virus genomic RNA	4437	98.649	470	397	73	Negative	2.91e-31
								TRINITY_DN1376_c19_g1_i42	3886	NC_003627.1 Maize chlorotic mottle virus genomic RNA	4437	96.471	3970	174	3796	Negative	0
								TRINITY_DN1376_c19_g1_i43	955	NC_003627.1 Maize chlorotic mottle virus genomic RNA	4437	97.158	3729	2991	738	Negative	0
								TRINITY_DN1376_c19_g1_i44	227	NC_003627.1 Maize chlorotic mottle virus genomic RNA	4437	97.015	2808	2675	133	Negative	1.39e-59
								TRINITY_DN1376_c19_g1_i45	295	NC_003627.1 Maize chlorotic mottle virus genomic RNA	4437	97.436	915	760	155	Negative	1.09e-71
								TRINITY_DN1376_c19_g1_i46	3868	NC_003627.1 Maize chlorotic mottle virus genomic RNA	4437	96.512	3871	174	3697	Negative	0
								TRINITY_DN1316_c5_g3_i9	273	NC_003627.1 Maize chlorotic mottle virus genomic RNA	4437	100	1446	1475	-29	Positive	2.36e-08
								TRINITY_DN1348_c3_g3_i5	331	NC_003627.1 Maize chlorotic mottle virus genomic RNA	4437	95	4351	4410	-59	Positive	2.22e-19
								TRINITY_DN1314_c2_g1_i2	328	NC_003627.1 Maize chlorotic mottle virus genomic RNA	4437	95.385	577	641	-64	Positive	3.65e-22
								TRINITY_DN1314_c4_g2_i2	241	NC_003627.1 Maize chlorotic mottle virus genomic RNA	4437	95	607	644	-37	Positive	4.43e-10
								TRINITY_DN1342_c1_g6_i1	328	NC_003627.1 Maize chlorotic mottle virus genomic RNA	4437	98.75	2474	2553	-79	Positive	2.15e-34
								TRINITY_DN1313_c6_g2_i1	307	NC_003627.1 Maize chlorotic mottle virus genomic RNA	4437	95.455	3027	2962	65	Negative	2.63e-23
								TRINITY_DN1038_c0_g1_i1	588	NC_003627.1 Maize chlorotic mottle virus genomic RNA	4437	90	1637	1725	-88	Positive	8.66e-26
								TRINITY_DN1076_c0_g1_i1	751	NC_003627.1 Maize chlorotic mottle virus genomic RNA	4437	96.774	218	310	-92	Positive	6.57e-38
								TRINITY_DN1053_c0_g1_i2	321	NC_003627.1 Maize chlorotic mottle virus genomic RNA	4437	96	368	417	-49	Positive	4.65e-16
								TRINITY_DN1032_c1_g1_i1	309	NC_003627.1 Maize chlorotic mottle virus genomic RNA	4437	92.391	3788	3697	91	Negative	1.57e-30
								TRINITY_DN1094_c1_g1_i2	408	NC_003627.1 Maize chlorotic mottle virus genomic RNA	4437	96.721	4219	4340	-121	Positive	1.23e-52
								TRINITY_DN1050_c0_g1_i1	244	NC_003627.1 Maize chlorotic mottle virus genomic RNA	4437	96.552	3859	3916	-57	Positive	1.23e-20
								TRINITY_DN1294_c0_g1_i1	232	NC_003627.1 Maize chlorotic mottle virus genomic RNA	4437	95.122	2169	2209	-40	Positive	3.29e-11
								TRINITY_DN1270_c0_g1_i1	427	NC_003627.1 Maize chlorotic mottle virus genomic RNA	4437	96.226	3027	2922	105	Negative	1.01e-43
								TRINITY_DN4274_c0_g1_i1	270	NC_003627.1 Maize chlorotic mottle virus genomic RNA	4437	95.918	818	915	-97	Positive	1.73e-39
								TRINITY_DN5856_c0_g1_i1	264	NC_003627.1 Maize chlorotic mottle virus genomic RNA	4437	97.561	376	416	-40	Positive	8.14e-13
								TRINITY_DN3410_c0_g1_i1	328	NC_003627.1 Maize chlorotic mottle virus genomic RNA	4437	93.421	2963	3038	-75	Positive	6.07e-25
								TRINITY_DN638_c0_g1_i1	621	NC_003627.1 Maize chlorotic mottle virus genomic RNA	4437	93.617	1553	1646	-93	Positive	1.51e-33
								TRINITY_DN5132_c0_g1_i1	406	NC_003627.1 Maize chlorotic mottle virus genomic RNA	4437	94.118	850	934	-84	Positive	7.56e-30
								TRINITY_DN69_c0_g1_i1	449	NC_003627.1 Maize chlorotic mottle virus genomic RNA	4437	100	1010	980	30	Negative	1.12e-08
								TRINITY_DN519_c0_g1_i2	378	NC_003627.1 Maize chlorotic mottle virus genomic RNA	4437	97.5	442	481	-39	Positive	4.31e-12
								TRINITY_DN4757_c0_g1_i1	281	NC_003627.1 Maize chlorotic mottle virus genomic RNA	4437	100	4217	4180	37	Negative	8.71e-13
								TRINITY_DN3184_c0_g1_i1	365	NC_003627.1 Maize chlorotic mottle virus genomic RNA	4437	92.105	2626	2700	-74	Positive	3.16e-23
								TRINITY_DN7705_c0_g1_i1	203	NC_003627.1 Maize chlorotic mottle virus genomic RNA	4437	95.745	3222	3176	46	Negative	1.31e-14
								TRINITY_DN6281_c0_g1_i1	363	NC_003627.1 Maize chlorotic mottle virus genomic RNA	4437	90.909	318	242	76	Negative	4.07e-22
								TRINITY_DN783_c0_g1_i1	473	NC_003627.1 Maize chlorotic mottle virus genomic RNA	4437	92.784	3638	3543	95	Negative	4.09e-33
								TRINITY_DN765_c0_g1_i2	550	NC_003627.1 Maize chlorotic mottle virus genomic RNA	4437	95.276	2677	2802	-125	Positive	2.17e-51
								Maize chlorotic mottle virus										Sugarcane mosaic virus									Maize streak virus									Pepper chlorotic spot virus isolate 14YV733 segment L									Sweet potato latent virus
Researcher	Sample	Host	Total	Total	Unique_Contigs	Total	Contigs	Conting	Conting	Reference	Reference	%	Coordinates			Polarity	E	Conting	Conting	Reference	Reference	%	Coordinates		Polarity	E	Conting	Conting	Reference	Reference	%	Coordinates		Polarity	E	Conting	Conting	Reference	Reference	%	Coordinates		Polarity	E	Conting	Conting	Reference	Reference	%
		Maize Leaf	Sequences	Contigs	matching to Virus	virus	Unmatch_to _PVGDB/NCBI		Length		Length	identity	Start	End			value		Length		Length	identity	Start	End		value		Length		Length	identity	Start	End		value		Length		Length	identity	Start	End		value		Length		Length	identity
DNS	14	592081	1019166	104881	20	9	77542	TRINITY_DN9438_c0_g2_i1	304	NC_003627.1 Maize chlorotic mottle virus genomic RNA	4437	92.233	2766	2971		Positive	1.86e-79	TRINITY_DN56663_c0_g1_i1	454	NC_003398.1 Sugarcane mosaic virus	9596	84.086	2886	3304	Positive	4.53e-112	TRINITY_DN9661_c1_g2_i1	2186	NC_001346.2 Maize streak virus - A[Ama]	2689	98.719	1	1718	Positive	0	TRINITY_DN9348_c0_g1_i7	541	NC_033774.1 Pepper chlorotic spot virus isolate 14YV733 segment L	8913	95.385	8851	8913	Positive	6.18e-22	TRINITY_DN9100_c0_g1_i2	921	NC_020896.1 Sweet potato latent virus	10081	83.2
DNS	14							TRINITY_DN9438_c0_g2_i2	4404	NC_003627.1 Maize chlorotic mottle virus genomic RNA	4437	96.685	10	4413		Positive	0	TRINITY_DN9855_c0_g1_i1	1599	NC_003398.1 Sugarcane mosaic virus	9596	78.258	4222	2886	Negative	0	TRINITY_DN9661_c1_g2_i1	2186	NC_001346.2 Maize streak virus - A[Ama]	2689	98.239	2406	2689	Positive	2.81e-140										TRINITY_DN9100_c0_g1_i3	1032	NC_020896.1 Sweet potato latent virus	10081	83.2
DNS	14																	TRINITY_DN29232_c0_g1_i1	610	NC_003398.1 Sugarcane mosaic virus	9596	86.789	2373	2917	Positive	3.38e-174	TRINITY_DN9661_c1_g2_i1	2186	NC_001346.2 Maize streak virus - A[Ama]	2689	98.83	1548	1718	Positive	1.83e-82										TRINITY_DN9100_c0_g1_i4	973	NC_020896.1 Sweet potato latent virus	10081	83.2
DNS	14																	TRINITY_DN6263_c0_g1_i1	457	NC_003398.1 Sugarcane mosaic virus	9596	93.677	8851	9277	Positive	0																			TRINITY_DN9100_c0_g1_i5	921	NC_020896.1 Sweet potato latent virus	10081	83.2
DNS	14
DNS	14
DNS	14
DNS	14
								Maize chlorotic mottle virus										Sugarcane mosaic virus									Maize streak virus									Maize yellow dwarf virus-RMV2
Researcher	Sample	Host	Total	Total	Unique_Contigs	Total	Contigs	Conting	Conting	Reference	Reference	%	Coordinates			Polarity	E	Conting	Conting	Reference	Reference	%	Coordinates		Polarity	E	Conting	Conting	Reference	Reference	%	Coordinates		Polarity	E	Conting	Conting	Reference	Reference	%	Coordinates		Polarity	E
		Maize Leaf	Sequences	Contigs	matching to Virus	virus	Unmatch_to _PVGDB/NCBI		Length		Length	identity	Start	End			value		Length		Length	identity	Start	End		value		Length		Length	identity	Start	End		value		Length		Length	identity	Start	End		value
DNS	15		950703	16329	10	4	3933	TRINITY_DN1480_c4_g2_i1	2913	NC_003627.1 Maize chlorotic mottle virus genomic RNA	4437	96.452	11	2799		Positive	0	TRINITY_DN1496_c1_g1_i7	9631	NC_003398.1 Sugarcane mosaic virus	9596	79.359	572	8401	Positive	0	TRINITY_DN159_c0_g1_i1	1263	NC_001346.2 Maize streak virus - A[Ama]	2689	98.654	1605	343	Negative	0	TRINITY_DN1471_c3_g2_i1	5608	NC_029990.1 Maize yellow dwarf virus-RMV2	5625	97.243	5590	8	Negative	0
DNS	15							TRINITY_DN1480_c4_g2_i2	4402	NC_003627.1 Maize chlorotic mottle virus genomic RNA	4437	96.683	11	4412		Positive	0	TRINITY_DN1496_c1_g1_i7	9631	NC_003398.1 Sugarcane mosaic virus	9596	87.984	8594	9596	Positive	0	TRINITY_DN9560_c0_g1_i1	330	NC_001346.2 Maize streak virus - A[Ama]	2689	98.266	173	1	Negative	9.38e-83	TRINITY_DN1471_c3_g2_i2	5515	NC_029990.1 Maize yellow dwarf virus-RMV2	5625	97.227	5341	8	Negative	0
DNS	15																	TRINITY_DN1496_c2_g1_i1	485	NC_003398.1 Sugarcane mosaic virus	9596	84.407	3391	2913	Negative	1.31e-132	TRINITY_DN9560_c0_g1_i1	330	NC_001346.2 Maize streak virus - A[Ama]	2689	98.63	2689	2544	Negative	2.06e-69
DNS	15																	TRINITY_DN5267_c0_g1_i1	536	NC_003398.1 Sugarcane mosaic virus	9596	90.485	899	1434	Positive	0
DNS	15																	TRINITY_DN4524_c0_g1_i1	388	NC_003398.1 Sugarcane mosaic virus	9596	87.565	4867	4482	Negative	4.87e-126
DNS	15
DNS	15
DNS	15
								Maize chlorotic mottle virus										Sugarcane mosaic virus									Maize streak virus									Maize yellow dwarf virus-RMV2
Researcher	Sample	Host	Total	Total	Unique_Contigs	Total	Contigs	Conting	Conting	Reference	Reference	%	Coordinates			Polarity	E	Conting	Conting	Reference	Reference	%	Coordinates		Polarity	E	Conting	Conting	Reference	Reference	%	Coordinates		Polarity	E	Conting	Conting	Reference	Reference	%	Coordinates		Polarity	E
		Maize Leaf	Sequences	Contigs	matching to Virus	virus	Unmatch_to _PVGDB/NCBI		Length		Length	identity	Start	End			value		Length		Length	identity	Start	End		value		Length		Length	identity	Start	End		value		Length		Length	identity	Start	End		value
DNS	16		751589	64572	86	4	17718	TRINITY_DN5563_c0_g1_i1	387	NC_003627.1 Maize chlorotic mottle virus genomic RNA	4437	93.478	920	875		Negative	1.59e-11	TRINITY_DN7666_c6_g1_i1	556	NC_003398.1 Sugarcane mosaic virus	9596	89.885	8664	9187	Positive	0	TRINITY_DN29041_c0_g1_i1	1954	NC_001346.2 Maize streak virus - A[Ama]	2689	98.501	1668	1	Negative	0	TRINITY_DN11105_c0_g1_i1	343	NC_029990.1 Maize yellow dwarf virus-RMV2	5625	97.085	3174	3516	Positive	1.45e-165
DNS	16							TRINITY_DN11001_c0_g1_i1	322	NC_003627.1 Maize chlorotic mottle virus genomic RNA	4437	100	4175	4254		Positive	4.53e-36	TRINITY_DN7666_c6_g1_i2	628	NC_003398.1 Sugarcane mosaic virus	9596	87.522	8613	9187	Positive	0	TRINITY_DN29041_c0_g1_i1	1954	NC_001346.2 Maize streak virus - A[Ama]	2689	97.909	2689	2403	Negative	2.51e-140	TRINITY_DN22762_c0_g1_i1	250	NC_029990.1 Maize yellow dwarf virus-RMV2	5625	95.082	1246	1428	Positive	1.95e-78
DNS	16							TRINITY_DN4339_c0_g1_i1	269	NC_003627.1 Maize chlorotic mottle virus genomic RNA	4437	97.917	925	878		Negative	1.07e-16	TRINITY_DN29649_c0_g1_i1	363	NC_003398.1 Sugarcane mosaic virus	9596	90.083	1791	2153	Positive	2.69e-133	TRINITY_DN22237_c0_g1_i1	312	NC_001346.2 Maize streak virus - A[Ama]	2689	96.429	1751	2058	Positive	1.74e-144
DNS	16							TRINITY_DN7644_c5_g4_i1	622	NC_003627.1 Maize chlorotic mottle virus genomic RNA	4437	96.25	1809	1730		Negative	9.11e-31	TRINITY_DN31696_c0_g1_i1	845	NC_003398.1 Sugarcane mosaic virus	9596	79.787	3467	4311	Positive	1.02e-175
DNS	16							TRINITY_DN8149_c1_g1_i4	223	NC_003627.1 Maize chlorotic mottle virus genomic RNA	4437	95.146	2324	2426		Positive	1.08e-40
DNS	16							TRINITY_DN8119_c12_g1_i1	209	NC_003627.1 Maize chlorotic mottle virus genomic RNA	4437	94.048	3132	3049		Negative	3.68e-30
DNS	16							TRINITY_DN8148_c7_g2_i1	321	NC_003627.1 Maize chlorotic mottle virus genomic RNA	4437	95.575	1561	1673		Positive	4.45e-46
DNS	16							TRINITY_DN3845_c0_g1_i1	294	NC_003627.1 Maize chlorotic mottle virus genomic RNA	4437	96.117	4237	4135		Negative	3.15e-42
								TRINITY_DN14717_c0_g1_i1	297	NC_003627.1 Maize chlorotic mottle virus genomic RNA	4437	95.455	921	878		Negative	3.33e-12
								TRINITY_DN6927_c0_g1_i1	256	NC_003627.1 Maize chlorotic mottle virus genomic RNA	4437	97.826	807	898		Positive	1.63e-39
								TRINITY_DN6927_c0_g1_i2	271	NC_003627.1 Maize chlorotic mottle virus genomic RNA	4437	98.291	807	923		Positive	2.2e-53
								TRINITY_DN8392_c23_g1_i1	344	NC_003627.1 Maize chlorotic mottle virus genomic RNA	4437	98.98	4319	4416		Positive	2.23e-44
								TRINITY_DN8361_c15_g1_i1	305	NC_003627.1 Maize chlorotic mottle virus genomic RNA	4437	95.213	572	385		Negative	4.01e-81
								TRINITY_DN8361_c15_g1_i2	248	NC_003627.1 Maize chlorotic mottle virus genomic RNA	4437	96.667	1456	1337		Negative	9.29e-52
								TRINITY_DN8361_c15_g1_i3	296	NC_003627.1 Maize chlorotic mottle virus genomic RNA	4437	96.907	2626	2434		Negative	6.41e-89
								TRINITY_DN8361_c15_g1_i4	2910	NC_003627.1 Maize chlorotic mottle virus genomic RNA	4437	96.409	2799	15		Negative	0
								TRINITY_DN8361_c15_g1_i5	332	NC_003627.1 Maize chlorotic mottle virus genomic RNA	4437	96.774	230	15		Negative	5.53e-100
								TRINITY_DN8361_c15_g1_i6	201	NC_003627.1 Maize chlorotic mottle virus genomic RNA	4437	98.718	839	762		Negative	1.63e-33
								TRINITY_DN8361_c15_g1_i7	222	NC_003627.1 Maize chlorotic mottle virus genomic RNA	4437	97.98	4414	4316		Negative	1.79e-43
								TRINITY_DN8361_c15_g1_i8	366	NC_003627.1 Maize chlorotic mottle virus genomic RNA	4437	94.969	919	762		Negative	4.98e-66
								TRINITY_DN8361_c15_g1_i9	262	NC_003627.1 Maize chlorotic mottle virus genomic RNA	4437	93.706	1927	1786		Negative	1.27e-55
								TRINITY_DN8361_c15_g1_i10	388	NC_003627.1 Maize chlorotic mottle virus genomic RNA	4437	94.585	2460	2185		Negative	6.34e-120
								TRINITY_DN8361_c15_g1_i11	204	NC_003627.1 Maize chlorotic mottle virus genomic RNA	4437	96.552	3125	3039		Negative	1.28e-34
								TRINITY_DN8361_c15_g1_i12	255	NC_003627.1 Maize chlorotic mottle virus genomic RNA	4437	93.548	3219	3097		Negative	9.65e-47
								TRINITY_DN8361_c15_g1_i13	280	NC_003627.1 Maize chlorotic mottle virus genomic RNA	4437	96.053	2036	1885		Negative	3.74e-66
								TRINITY_DN8361_c15_g1_i14	263	NC_003627.1 Maize chlorotic mottle virus genomic RNA	4437	99.346	1033	881		Negative	4.45e-75
								TRINITY_DN8361_c15_g1_i15	4094	NC_003627.1 Maize chlorotic mottle virus genomic RNA	4437	96.39	4002	15		Negative	0
								TRINITY_DN8361_c15_g1_i16	219	NC_003627.1 Maize chlorotic mottle virus genomic RNA	4437	98.198	312	202		Negative	3.77e-50
								TRINITY_DN8361_c15_g1_i17	373	NC_003627.1 Maize chlorotic mottle virus genomic RNA	4437	94.215	2426	2185		Negative	3.74e-102
								TRINITY_DN8361_c15_g1_i18	291	NC_003627.1 Maize chlorotic mottle virus genomic RNA	4437	97.122	2572	2434		Negative	3.03e-62
								TRINITY_DN8361_c15_g1_i19	329	NC_003627.1 Maize chlorotic mottle virus genomic RNA	4437	95.312	576	385		Negative	2.6e-83
								TRINITY_DN8361_c15_g1_i20	2892	NC_003627.1 Maize chlorotic mottle virus genomic RNA	4437	96.411	2800	15		Negative	0
								TRINITY_DN8361_c15_g1_i21	288	NC_003627.1 Maize chlorotic mottle virus genomic RNA	4437	96.875	4105	3978		Negative	1.41e-55
								TRINITY_DN8361_c15_g1_i22	1111	NC_003627.1 Maize chlorotic mottle virus genomic RNA	4437	95.54	3054	2046		Negative	0
								TRINITY_DN8361_c15_g1_i23	264	NC_003627.1 Maize chlorotic mottle virus genomic RNA	4437	96.711	1674	1523		Negative	7.53e-68
								TRINITY_DN8361_c15_g1_i24	384	NC_003627.1 Maize chlorotic mottle virus genomic RNA	4437	95.588	2456	2185		Negative	1.04e-122
								TRINITY_DN8361_c15_g1_i25	4077	NC_003627.1 Maize chlorotic mottle virus genomic RNA	4437	96.488	4000	15		Negative	0
								TRINITY_DN8361_c15_g7_i1	217	NC_003627.1 Maize chlorotic mottle virus genomic RNA	4437	90.361	1733	1652		Negative	5e-24
								TRINITY_DN8361_c15_g8_i1	347	NC_003627.1 Maize chlorotic mottle virus genomic RNA	4437	97.222	2690	2655		Negative	6.58e-10
								TRINITY_DN8361_c15_g1_i26	306	NC_003627.1 Maize chlorotic mottle virus genomic RNA	4437	97.17	307	202		Negative	1.52e-45
								TRINITY_DN8361_c15_g1_i28	899	NC_003627.1 Maize chlorotic mottle virus genomic RNA	4437	95.878	2797	2046		Negative	0
								TRINITY_DN8361_c15_g1_i29	3831	NC_003627.1 Maize chlorotic mottle virus genomic RNA	4437	96.574	4414	708		Negative	0
								TRINITY_DN8361_c15_g1_i30	307	NC_003627.1 Maize chlorotic mottle virus genomic RNA	4437	96.026	1359	1209		Negative	1.48e-65
								TRINITY_DN8361_c15_g1_i31	244	NC_003627.1 Maize chlorotic mottle virus genomic RNA	4437	96.296	2775	2668		Negative	4.28e-45
								TRINITY_DN8361_c15_g1_i33	2931	NC_003627.1 Maize chlorotic mottle virus genomic RNA	4437	96.391	2868	15		Negative	0
								TRINITY_DN8361_c15_g1_i34	4378	NC_003627.1 Maize chlorotic mottle virus genomic RNA	4437	96.517	4234	15		Negative	0
								TRINITY_DN8361_c15_g1_i35	288	NC_003627.1 Maize chlorotic mottle virus genomic RNA	4437	96.939	210	15		Negative	1.34e-90
								TRINITY_DN8361_c15_g1_i36	244	NC_003627.1 Maize chlorotic mottle virus genomic RNA	4437	94.41	2207	2047		Negative	3.21e-66
								TRINITY_DN8361_c15_g1_i37	3082	NC_003627.1 Maize chlorotic mottle virus genomic RNA	4437	96.423	3061	15		Negative	0
								TRINITY_DN8361_c15_g1_i38	316	NC_003627.1 Maize chlorotic mottle virus genomic RNA	4437	97.605	2600	2434		Negative	3.24e-77
								TRINITY_DN8361_c15_g1_i39	4378	NC_003627.1 Maize chlorotic mottle virus genomic RNA	4437	96.58	4224	15		Negative	0
								TRINITY_DN8361_c15_g1_i40	4014	NC_003627.1 Maize chlorotic mottle virus genomic RNA	4437	96.531	3906	15		Negative	0
								TRINITY_DN8361_c15_g1_i41	261	NC_003627.1 Maize chlorotic mottle virus genomic RNA	4437	96.774	1557	1434		Negative	2.11e-53
								TRINITY_DN8361_c15_g1_i42	472	NC_003627.1 Maize chlorotic mottle virus genomic RNA	4437	97.097	323	15		Negative	3.47e-148
								TRINITY_DN8361_c15_g1_i43	232	NC_003627.1 Maize chlorotic mottle virus genomic RNA	4437	96.063	2793	2668		Negative	1.86e-53
								TRINITY_DN8361_c15_g1_i44	220	NC_003627.1 Maize chlorotic mottle virus genomic RNA	4437	98.182	311	202		Negative	1.36e-49
								TRINITY_DN8361_c15_g1_i46	4417	NC_003627.1 Maize chlorotic mottle virus genomic RNA	4437	96.66	4415	15		Negative	0
								TRINITY_DN8398_c13_g3_i6	255	NC_003627.1 Maize chlorotic mottle virus genomic RNA	4437	93	2760	2858		Positive	4.55e-35
								TRINITY_DN1824_c0_g1_i1	220	NC_003627.1 Maize chlorotic mottle virus genomic RNA	4437	94.737	2032	2088		Positive	6.61e-18
								TRINITY_DN1851_c0_g1_i2	289	NC_003627.1 Maize chlorotic mottle virus genomic RNA	4437	98.649	4343	4415		Positive	1.46e-30
								TRINITY_DN225_c0_g2_i1	323	NC_003627.1 Maize chlorotic mottle virus genomic RNA	4437	98.551	973	1041		Positive	2.76e-28
								TRINITY_DN7043_c0_g1_i2	331	NC_003627.1 Maize chlorotic mottle virus genomic RNA	4437	92.063	3721	3660		Negative	1.03e-17
								TRINITY_DN17713_c0_g1_i1	273	NC_003627.1 Maize chlorotic mottle virus genomic RNA	4437	95.238	919	879		Negative	3.93e-11
								TRINITY_DN5881_c0_g1_i2	498	NC_003627.1 Maize chlorotic mottle virus genomic RNA	4437	98.077	1813	1762		Negative	1.23e-18
								TRINITY_DN18234_c0_g1_i1	299	NC_003627.1 Maize chlorotic mottle virus genomic RNA	4437	97.115	919	816		Negative	1.92e-44
								TRINITY_DN21880_c0_g1_i1	234	NC_003627.1 Maize chlorotic mottle virus genomic RNA	4437	100	915	879		Negative	2.57e-12
								TRINITY_DN1768_c0_g1_i1	259	NC_003627.1 Maize chlorotic mottle virus genomic RNA	4437	94.595	580	652		Positive	1.31e-25
								TRINITY_DN8287_c4_g2_i1	335	NC_003627.1 Maize chlorotic mottle virus genomic RNA	4437	100	3372	3414		Positive	1.75e-15
								TRINITY_DN8228_c6_g7_i2	1271	NC_003627.1 Maize chlorotic mottle virus genomic RNA	4437	95.161	2486	2607		Positive	2.38e-49
								TRINITY_DN25379_c0_g1_i1	270	NC_003627.1 Maize chlorotic mottle virus genomic RNA	4437	97.674	901	816		Negative	3.75e-36
								TRINITY_DN6038_c1_g1_i1	222	NC_003627.1 Maize chlorotic mottle virus genomic RNA	4437	100	2664	2698		Positive	3.13e-11
								TRINITY_DN4790_c0_g1_i1	228	NC_003627.1 Maize chlorotic mottle virus genomic RNA	4437	97.183	3645	3715		Positive	6.78e-28
								TRINITY_DN2677_c0_g2_i1	251	NC_003627.1 Maize chlorotic mottle virus genomic RNA	4437	98.077	2494	2443		Negative	5.91e-19
								TRINITY_DN6816_c0_g1_i1	341	NC_003627.1 Maize chlorotic mottle virus genomic RNA	4437	90.667	2262	2189		Negative	4.92e-21
								TRINITY_DN6816_c1_g1_i1	308	NC_003627.1 Maize chlorotic mottle virus genomic RNA	4437	98.305	1754	1812		Positive	9.49e-23
								TRINITY_DN8048_c1_g3_i1	461	NC_003627.1 Maize chlorotic mottle virus genomic RNA	4437	95.714	3415	3483		Positive	8.68e-25
								TRINITY_DN7783_c6_g5_i3	238	NC_003627.1 Maize chlorotic mottle virus genomic RNA	4437	96.552	2679	2794		Positive	1.49e-49
								TRINITY_DN7859_c2_g1_i13	344	NC_003627.1 Maize chlorotic mottle virus genomic RNA	4437	95	2399	2458		Positive	6.43e-20
								Maize chlorotic mottle virus										Sugarcane mosaic virus									Maize streak virus									Johnsongrass mosaic virus									Sorghum mosaic virus
Researcher	Sample	Host	Total	Total	Unique_Contigs	Total	Contigs	Conting	Conting	Reference	Reference	%	Coordinates			Polarity	E	Conting	Conting	Reference	Reference	%	Coordinates		Polarity	E	Conting	Conting	Reference	Reference	%	Coordinates		Polarity	E	Conting	Conting	Reference	Reference	%	Coordinates		Polarity	E	Conting	Conting	Reference	Reference	%
		Maize Leaf	Sequences	Contigs	matching to Virus	virus	Unmatch_to _PVGDB/NCBI		Length		Length	identity	Start	End			value		Length		Length	identity	Start	End		value		Length		Length	identity	Start	End		value		Length		Length	identity	Start	End		value		Length		Length	identity
DNS	17		791822	39076	32	8	12278	TRINITY_DN3667_c3_g1_i2	2152	NC_003627.1 Maize chlorotic mottle virus genomic RNA	4437	96.794	4410	2259	2151	Negative	0	TRINITY_DN14568_c0_g1_i1	354	NC_003398.1 Sugarcane mosaic virus	9596	90.935	738	1090	Positive	2.03e-134	TRINITY_DN3522_c2_g2_i6	1533	NC_001346.2 Maize streak virus - A[Ama]	2689	97.5	1562	163	Negative	0	TRINITY_DN19203_c0_g1_i1	244	NC_003606.1 Johnsongrass mosaic virus	9779	84	7703	7801	Positive	4.43e-20	TRINITY_DN2100_c0_g1_i1	607	NC_004035.1 Sorghum mosaic virus	9624	79.2
DNS	17							TRINITY_DN3667_c3_g1_i1	1875	NC_003627.1 Maize chlorotic mottle virus genomic RNA	4437	96.856	4410	2598	1812	Negative	0	TRINITY_DN21786_c0_g1_i1	285	NC_003398.1 Sugarcane mosaic virus	9596	83.158	2817	3101	Positive	4.89e-70	TRINITY_DN3522_c2_g2_i5	1470	NC_001346.2 Maize streak virus - A[Ama]	2689	97.628	1616	269	Negative	0
DNS	17							TRINITY_DN3189_c0_g1_i1	1728	NC_003627.1 Maize chlorotic mottle virus genomic RNA	4437	96.685	16	1674	-1658	Positive	0	TRINITY_DN4905_c0_g1_i1	264	NC_003398.1 Sugarcane mosaic virus	9596	89.394	5645	5908	Positive	9.4e-92	TRINITY_DN3522_c2_g2_i1	1454	NC_001346.2 Maize streak virus - A[Ama]	2689	97.868	1616	163	Negative	0
DNS	17							TRINITY_DN3667_c3_g3_i2	614	NC_003627.1 Maize chlorotic mottle virus genomic RNA	4437	96.091	1670	2283	-613	Positive	0										TRINITY_DN3522_c2_g2_i8	1334	NC_001346.2 Maize streak virus - A[Ama]	2689	97.797	1342	163	Negative	0
DNS	17							TRINITY_DN3667_c3_g3_i1	226	NC_003627.1 Maize chlorotic mottle virus genomic RNA	4437	97.423	1670	1863	-193	Positive	2.85e-91										TRINITY_DN3522_c2_g2_i7	738	NC_001346.2 Maize streak virus - A[Ama]	2689	97.983	1616	1022	Negative	0
DNS	17																										TRINITY_DN3522_c2_g3_i1	711	NC_001346.2 Maize streak virus - A[Ama]	2689	95.372	2633	1921	Negative	0
DNS	17																										TRINITY_DN3522_c2_g2_i2	666	NC_001346.2 Maize streak virus - A[Ama]	2689	98.428	1616	1108	Negative	0
DNS	17																										TRINITY_DN3522_c2_g2_i12	643	NC_001346.2 Maize streak virus - A[Ama]	2689	98.168	1616	1071	Negative	0
																											TRINITY_DN3522_c2_g2_i11	539	NC_001346.2 Maize streak virus - A[Ama]	2689	99.078	379	163	Negative	1.17e-108
																											TRINITY_DN3522_c2_g2_i11	539	NC_001346.2 Maize streak virus - A[Ama]	2689	96.61	1	177	Positive	9.46e-80
																											TRINITY_DN3522_c2_g2_i11	539	NC_001346.2 Maize streak virus - A[Ama]	2689	92.667	2633	2484	Negative	7.58e-56
																											TRINITY_DN3522_c2_g2_i9	505	NC_001346.2 Maize streak virus - A[Ama]	2689	99.13	2575	2689	Positive	1.18e-53
																											TRINITY_DN3522_c2_g2_i4	441	NC_001346.2 Maize streak virus - A[Ama]	2689	98.423	1616	1300	Negative	2.46e-159
																											TRINITY_DN3522_c2_g1_i1	354	NC_001346.2 Maize streak virus - A[Ama]	2689	97.734	1592	1944	Positive	1.91e-174
																											TRINITY_DN14461_c0_g1_i1	326	NC_001346.2 Maize streak virus - A[Ama]	2689	94.545	1256	1310	Positive	3.65e-17
																											TRINITY_DN14461_c0_g1_i1	326	NC_001346.2 Maize streak virus - A[Ama]	2689	100	1004	973	Negative	2.21e-09
																											TRINITY_DN12573_c0_g1_i1	306	NC_001346.2 Maize streak virus - A[Ama]	2689	98.305	1338	1280	Negative	9.42e-23
																											TRINITY_DN3522_c2_g7_i1	298	NC_001346.2 Maize streak virus - A[Ama]	2689	98.876	251	163	Negative	1.93e-39
																											TRINITY_DN3522_c2_g2_i13	296	NC_001346.2 Maize streak virus - A[Ama]	2689	98.305	1616	1441	Negative	1.79e-84
																											TRINITY_DN3522_c2_g2_i3	268	NC_001346.2 Maize streak virus - A[Ama]	2689	96.791	1	187	Positive	1.25e-85
																											TRINITY_DN3522_c2_g2_i3	268	NC_001346.2 Maize streak virus - A[Ama]	2689	96.341	2608	2689	Positive	1.04e-31
																											TRINITY_DN3522_c2_g1_i2	241	NC_001346.2 Maize streak virus - A[Ama]	2689	95.858	1614	1782	Positive	5.23e-74
																											TRINITY_DN3522_c2_g2_i10	230	NC_001346.2 Maize streak virus - A[Ama]	2689	98.347	1616	1496	Negative	1.1e-55
								Maize chlorotic mottle virus										Sugarcane mosaic virus									Maize streak virus									Maize yellow dwarf virus-RMV2									Maize yellow dwarf virus-RMV
Researcher	Sample	Host	Total	Total	Unique_Contigs	Total	Contigs	Conting	Conting	Reference	Reference	%	Coordinates			Polarity	E	Conting	Conting	Reference	Reference	%	Coordinates		Polarity	E	Conting	Conting	Reference	Reference	%	Coordinates		Polarity	E	Conting	Conting	Reference	Reference	%	Coordinates		Polarity	E	Conting	Conting	Reference	Reference	%
		Maize Leaf	Sequences	Contigs	matching to Virus	virus	Unmatch_to _PVGDB/NCBI		Length		Length	identity	Start	End			value		Length		Length	identity	Start	End		value		Length		Length	identity	Start	End		value		Length		Length	identity	Start	End		value		Length		Length	identity
DNS	18		658945	2486	35	11	350	TRINITY_DN223_c1_g2_i1	353	NC_003627.1 Maize chlorotic mottle virus genomic RNA	4437	95.694	2798	2590		Negative	9.94e-93	TRINITY_DN1639_c0_g1_i1	230	NC_003398.1 Sugarcane mosaic virus	9596	91.304	5032	5261	Positive	2.93e-86	TRINITY_DN626_c0_g1_i1	1828	NC_001346.2 Maize streak virus - A[Ama]	2689	98.436	1	1662	Positive	0	TRINITY_DN1107_c0_g1_i1	361	NC_029990.1 Maize yellow dwarf virus-RMV2	5625	98.338	878	518	Negative	0	TRINITY_DN1353_c0_g1_i1	687	NC_021484.1 Maize yellow dwarf virus-RMV	5612	86.812
DNS	18							TRINITY_DN223_c1_g2_i2	432	NC_003627.1 Maize chlorotic mottle virus genomic RNA	4437	97.087	1807	1499		Negative	3.17e-148	TRINITY_DN1610_c0_g1_i1	237	NC_003398.1 Sugarcane mosaic virus	9596	90.558	5785	5553	Negative	1.41e-84	TRINITY_DN626_c0_g1_i1	1828	NC_001346.2 Maize streak virus - A[Ama]	2689	98.204	2523	2689	Positive	1.19e-78	TRINITY_DN342_c0_g1_i1	840	NC_029990.1 Maize yellow dwarf virus-RMV2	5625	98.095	3631	2792	Negative	0
DNS	18							TRINITY_DN223_c1_g2_i3	4163	NC_003627.1 Maize chlorotic mottle virus genomic RNA	4437	96.545	4097	17		Negative	0	TRINITY_DN222_c0_g1_i1	2222	NC_003398.1 Sugarcane mosaic virus	9596	79.738	3489	5695	Positive	0										TRINITY_DN259_c0_g1_i1	781	NC_029990.1 Maize yellow dwarf virus-RMV2	5625	95.775	4726	5506	Positive	0
DNS	18							TRINITY_DN223_c1_g2_i4	4396	NC_003627.1 Maize chlorotic mottle virus genomic RNA	4437	96.679	4412	17		Negative	0	TRINITY_DN222_c0_g1_i2	338	NC_003398.1 Sugarcane mosaic virus	9596	82.848	3489	3796	Positive	2.1e-74										TRINITY_DN1353_c0_g1_i1	687	NC_029990.1 Maize yellow dwarf virus-RMV2	5625	98.108	2083	2769	Positive	0
DNS	18							TRINITY_DN94_c0_g1_i1	242	NC_003627.1 Maize chlorotic mottle virus genomic RNA	4437	98.592	647	717		Positive	1.56e-29	TRINITY_DN222_c0_g1_i3	2287	NC_003398.1 Sugarcane mosaic virus	9596	79.982	3487	5729	Positive	0										TRINITY_DN1284_c0_g1_i1	446	NC_029990.1 Maize yellow dwarf virus-RMV2	5625	95.27	3741	4181	Positive	0
DNS	18																	TRINITY_DN222_c0_g1_i4	2370	NC_003398.1 Sugarcane mosaic virus	9596	80.297	3489	5840	Positive	0										TRINITY_DN101_c0_g1_i1	651	NC_029990.1 Maize yellow dwarf virus-RMV2	5625	95.699	1006	1656	Positive	0
DNS	18																	TRINITY_DN222_c0_g2_i1	333	NC_003398.1 Sugarcane mosaic virus	9596	87.725	2787	3118	Positive	9.15e-108										TRINITY_DN1580_c0_g1_i1	519	NC_029990.1 Maize yellow dwarf virus-RMV2	5625	95.183	4198	4716	Positive	0
DNS	18																	TRINITY_DN226_c1_g1_i1	9586	NC_003398.1 Sugarcane mosaic virus	9596	79.969	8474	660	Negative	0
																		TRINITY_DN226_c1_g1_i1	9586	NC_003398.1 Sugarcane mosaic virus	9596	87.654	9578	8613	Negative	0
																		TRINITY_DN209_c0_g1_i2	1315	NC_003398.1 Sugarcane mosaic virus	9596	74.962	16	1309	Positive	2.71e-163
																		TRINITY_DN212_c0_g1_i1	1314	NC_003398.1 Sugarcane mosaic virus	9596	81.397	1613	2926	Positive	0
																		TRINITY_DN519_c0_g1_i1	203	NC_003398.1 Sugarcane mosaic virus	9596	91.089	367	567	Positive	1.56e-73
								Maize chlorotic mottle virus										Sugarcane mosaic virus									Maize streak virus									Maize dwarf mosaic virus									Pennisetum mosaic virus
Researcher	Sample	Host	Total	Total	Unique_Contigs	Total	Contigs	Conting	Conting	Reference	Reference	%	Coordinates			Polarity	E	Conting	Conting	Reference	Reference	%	Coordinates		Polarity	E	Conting	Conting	Reference	Reference	%	Coordinates		Polarity	E	Conting	Conting	Reference	Reference	%	Coordinates		Polarity	E	Conting	Conting	Reference	Reference	%
		Maize Leaf	Sequences	Contigs	matching to Virus	virus	Unmatch_to _PVGDB/NCBI		Length		Length	identity	Start	End			value		Length		Length	identity	Start	End		value		Length		Length	identity	Start	End		value		Length		Length	identity	Start	End		value		Length		Length	identity
DNS	19		856119	12313	13	5	2603	TRINITY_DN1000_c1_g9_i1	4395	NC_003627.1 Maize chlorotic mottle virus genomic RNA	4437	96.61	17	4410		Positive	0	TRINITY_DN1060_c0_g1_i1	6999	NC_003398.1 Sugarcane mosaic virus	9596	79.607	7664	669	Negative	0	TRINITY_DN1000_c2_g1_i1	1435	NC_001346.2 Maize streak virus - A[Ama]	2689	98.342	1	1206	Positive	0	TRINITY_DN1035_c0_g1_i1	3308	NC_003377.1 Maize dwarf mosaic virus	9515	80.804	8585	9255	Positive	1.96e-148	TRINITY_DN1035_c0_g1_i3	2316	NC_007147.1 Pennisetum mosaic virus	9611	80.591
DNS	19																	TRINITY_DN1035_c0_g1_i1	3308	NC_003398.1 Sugarcane mosaic virus	9596	87.692	8613	9580	Positive	0	TRINITY_DN1000_c2_g1_i1	1435	NC_001346.2 Maize streak virus - A[Ama]	2689	94.203	2483	2689	Positive	1.99e-85	TRINITY_DN1035_c0_g1_i2	2385	NC_003377.1 Maize dwarf mosaic virus	9515	80.804	8585	9255	Positive	1.41e-148
DNS	19																	TRINITY_DN1035_c0_g1_i2	2385	NC_003398.1 Sugarcane mosaic virus	9596	87.692	8613	9580	Positive	0	TRINITY_DN5777_c0_g1_i1	335	NC_001346.2 Maize streak virus - A[Ama]	2689	99.104	1273	1607	Positive	8.4e-173
DNS	19																	TRINITY_DN1035_c0_g1_i3	2316	NC_003398.1 Sugarcane mosaic virus	9596	88.29	8594	9554	Positive	0
DNS	19																	TRINITY_DN3430_c0_g1_i1	318	NC_003398.1 Sugarcane mosaic virus	9596	92.308	2833	2769	Negative	2.13e-19
DNS	19																	TRINITY_DN2052_c0_g1_i1	253	NC_003398.1 Sugarcane mosaic virus	9596	100	9242	9293	Positive	1.28e-20
DNS	19																	TRINITY_DN6049_c0_g1_i1	241	NC_003398.1 Sugarcane mosaic virus	9596	92.398	1383	1213	Negative	4.1e-65
DNS	19
								Maize chlorotic mottle virus										Sugarcane mosaic virus									Maize streak virus									Hubei Poty-like virus 1 strain SCM51506 polyprotein gene									Scallion mosaic virus
Researcher	Sample	Host	Total	Total	Unique_Contigs	Total	Contigs	Conting	Conting	Reference	Reference	%	Coordinates			Polarity	E	Conting	Conting	Reference	Reference	%	Coordinates		Polarity	E	Conting	Conting	Reference	Reference	%	Coordinates		Polarity	E	Conting	Conting	Reference	Reference	%	Coordinates		Polarity	E	Conting	Conting	Reference	Reference	%
		Maize Leaf	Sequences	Contigs	matching to Virus	virus	Unmatch_to _PVGDB/NCBI		Length		Length	identity	Start	End			value		Length		Length	identity	Start	End		value		Length		Length	identity	Start	End		value		Length		Length	identity	Start	End		value		Length		Length	identity
DNS	20		615872	36305	16	5	11535	TRINITY_DN3374_c0_g2_i1	3487	NC_003627.1 Maize chlorotic mottle virus genomic RNA	4437	96.559	4411	925		Negative	0	TRINITY_DN21994_c0_g1_i1	530	NC_003398.1 Sugarcane mosaic virus	9596	84.688	3114	3642	Positive	2.34e-150	TRINITY_DN3571_c0_g1_i5	2221	NC_001346.2 Maize streak virus - A[Ama]	2689	98.199	2506	286	Negative	0	TRINITY_DN8368_c0_g1_i1	393	NC_032912.1 Hubei Poty-like virus 1 strain SCM51506 polyprotein gene	9356	79.866	1808	1514	Negative	1.96e-55	TRINITY_DN444_c0_g1_i1	824	NC_003399.1 Scallion mosaic virus	9324	80
DNS	20							TRINITY_DN3374_c0_g1_i1	936	NC_003627.1 Maize chlorotic mottle virus genomic RNA	4437	97.329	14	949		Positive	0	TRINITY_DN17717_c0_g1_i1	439	NC_003398.1 Sugarcane mosaic virus	9596	78.311	3313	2881	Negative	9.94e-74	TRINITY_DN3571_c0_g1_i2	2048	NC_001346.2 Maize streak virus - A[Ama]	2689	97.776	2506	484	Negative	0
DNS	20																	TRINITY_DN4808_c0_g1_i1	384	NC_003398.1 Sugarcane mosaic virus	9596	86.007	8647	8939	Positive	5.1e-86	TRINITY_DN3571_c0_g1_i2	2048	NC_001346.2 Maize streak virus - A[Ama]	2689	100	278	310	Positive	4.1e-09
DNS	20																	TRINITY_DN21147_c0_g1_i1	341	NC_003398.1 Sugarcane mosaic virus	9596	94.649	9411	9116	Negative	5.45e-130	TRINITY_DN3571_c0_g1_i1	1638	NC_001346.2 Maize streak virus - A[Ama]	2689	97.973	2506	928	Negative	0
DNS	20																	TRINITY_DN15689_c0_g1_i1	288	NC_003398.1 Sugarcane mosaic virus	9596	90.592	808	1094	Positive	3.64e-106	TRINITY_DN3571_c0_g1_i3	1496	NC_001346.2 Maize streak virus - A[Ama]	2689	98.937	1602	286	Negative	0
DNS	20																	TRINITY_DN8230_c0_g1_i1	251	NC_003398.1 Sugarcane mosaic virus	9596	90.837	5534	5784	Positive	6.88e-93	TRINITY_DN3571_c0_g1_i4	927	NC_001346.2 Maize streak virus - A[Ama]	2689	98.443	1862	1285	Negative	0
DNS	20																										TRINITY_DN3571_c0_g1_i4	927	NC_001346.2 Maize streak virus - A[Ama]	2689	100	426	286	Negative	1.68e-69
DNS	20																										TRINITY_DN3571_c0_g2_i2	518	NC_001346.2 Maize streak virus - A[Ama]	2689	99.032	1	310	Positive	1.05e-158
								Maize chlorotic mottle virus										Sugarcane mosaic virus									Maize streak virus									Maize dwarf mosaic virus									Rose yellow vein virus strain RYVV-MN1
Researcher	Sample	Host	Total	Total	Unique_Contigs	Total	Contigs	Conting	Conting	Reference	Reference	%	Coordinates			Polarity	E	Conting	Conting	Reference	Reference	%	Coordinates		Polarity	E	Conting	Conting	Reference	Reference	%	Coordinates		Polarity	E	Conting	Conting	Reference	Reference	%	Coordinates		Polarity	E	Conting	Conting	Reference	Reference	%
		Maize Leaf	Sequences	Contigs	matching to Virus	virus	Unmatch_to _PVGDB/NCBI		Length		Length	identity	Start	End			value		Length		Length	identity	Start	End		value		Length		Length	identity	Start	End		value		Length		Length	identity	Start	End		value		Length		Length	identity
DNS	21		688119	56850	206	4	14979	TRINITY_DN15621_c0_g1_i1	362	NC_003627.1 Maize chlorotic mottle virus genomic RNA	4437	94.186	2434	2349	85	Negative	1.86e-30	TRINITY_DN5769_c3_g1_i1	838	NC_003398.1 Sugarcane mosaic virus	9596	81.081	4069	3479	Negative	6.43e-133	TRINITY_DN6041_c15_g1_i1	1890	NC_001346.2 Maize streak virus - A[Ama]	2689	98.426	1588	1	Negative	0	TRINITY_DN5769_c3_g1_i4	1285	NC_003377.1 Maize dwarf mosaic virus	9515	74.026	1245	720	Negative	6.7e-50	TRINITY_DN5002_c0_g1_i1	331	NC_020999.1 Rose yellow vein virus strain RYVV-MN1	9314	100
DNS	21							TRINITY_DN15694_c0_g1_i1	399	NC_003627.1 Maize chlorotic mottle virus genomic RNA	4437	96.923	4168	4232	-64	Positive	9.67e-24	TRINITY_DN5769_c3_g1_i2	730	NC_003398.1 Sugarcane mosaic virus	9596	80.251	4033	3479	Negative	2.65e-116		1890	NC_001346.2 Maize streak virus - A[Ama]	2689	97.619	2689	2397	Negative	5.22e-142	TRINITY_DN5769_c3_g1_i11	1190	NC_003377.1 Maize dwarf mosaic virus	9515	73.929	1266	720	Negative	1.33e-51
DNS	21							TRINITY_DN5910_c5_g1_i4	279	NC_003627.1 Maize chlorotic mottle virus genomic RNA	4437	95.588	1922	1855	67	Negative	1.83e-24	TRINITY_DN5769_c3_g1_i3	8872	NC_003398.1 Sugarcane mosaic virus	9596	79.273	8468	572	Negative	0
DNS	21							TRINITY_DN5971_c9_g1_i1	240	NC_003627.1 Maize chlorotic mottle virus genomic RNA	4437	99.123	4408	4295	113	Negative	1.93e-53	TRINITY_DN5769_c3_g1_i3	8872	NC_003398.1 Sugarcane mosaic virus	9596	84.52	8932	8613	Negative	1.24e-84
DNS	21							TRINITY_DN5916_c5_g1_i5	225	NC_003627.1 Maize chlorotic mottle virus genomic RNA	4437	95.614	1701	1812	-111	Positive	3.02e-46	TRINITY_DN5769_c3_g1_i5	1984	NC_003398.1 Sugarcane mosaic virus	9596	80.4	3098	1256	Negative	0
DNS	21							TRINITY_DN5961_c5_g1_i1	212	NC_003627.1 Maize chlorotic mottle virus genomic RNA	4437	97.619	2440	2357	83	Negative	3.71e-35	TRINITY_DN5769_c3_g1_i6	8774	NC_003398.1 Sugarcane mosaic virus	9596	79.273	8468	572	Negative	0
DNS	21							TRINITY_DN5961_c5_g1_i2	269	NC_003627.1 Maize chlorotic mottle virus genomic RNA	4437	96.203	2435	2357	78	Negative	1.35e-30	TRINITY_DN5769_c3_g1_i6	8774	NC_003398.1 Sugarcane mosaic virus	9596	82.008	8848	8613	Negative	1.29e-49
DNS	21							TRINITY_DN5942_c6_g2_i4	528	NC_003627.1 Maize chlorotic mottle virus genomic RNA	4437	97.581	718	841	-123	Positive	2.67e-55	TRINITY_DN5769_c3_g1_i7	1937	NC_003398.1 Sugarcane mosaic virus	9596	80.415	3079	1256	Negative	0
								TRINITY_DN5566_c3_g1_i5	209	NC_003627.1 Maize chlorotic mottle virus genomic RNA	4437	100	631	587	44	Negative	8.08e-17	TRINITY_DN5769_c3_g1_i8	2982	NC_003398.1 Sugarcane mosaic virus	9596	79.574	6382	3479	Negative	0
								TRINITY_DN5551_c3_g1_i29	277	NC_003627.1 Maize chlorotic mottle virus genomic RNA	4437	96.471	845	929	-84	Positive	6.45e-34	TRINITY_DN5769_c3_g1_i9	7116	NC_003398.1 Sugarcane mosaic virus	9596	79.202	7214	572	Negative	0
								TRINITY_DN5588_c6_g1_i2	212	NC_003627.1 Maize chlorotic mottle virus genomic RNA	4437	94.118	2800	2716	84	Negative	1.04e-30	TRINITY_DN5769_c3_g1_i10	8596	NC_003398.1 Sugarcane mosaic virus	9596	79.273	8468	572	Negative	0
								TRINITY_DN5525_c8_g1_i3	242	NC_003627.1 Maize chlorotic mottle virus genomic RNA	4437	96.154	827	930	-103	Positive	7.09e-43	TRINITY_DN5769_c3_g1_i12	9126	NC_003398.1 Sugarcane mosaic virus	9596	79.273	8468	572	Negative	0
								TRINITY_DN5545_c9_g1_i24	254	NC_003627.1 Maize chlorotic mottle virus genomic RNA	4437	91.304	2571	2684	-113	Positive	2.09e-38	TRINITY_DN5769_c3_g1_i12	9126	NC_003398.1 Sugarcane mosaic virus	9596	88.657	9279	8613	Negative	0
								TRINITY_DN5577_c11_g1_i1	352	NC_003627.1 Maize chlorotic mottle virus genomic RNA	4437	95.833	1301	1372	-71	Positive	1.41e-26	TRINITY_DN5769_c3_g1_i13	1066	NC_003398.1 Sugarcane mosaic virus	9596	79.446	4343	3479	Negative	1.67e-174
								TRINITY_DN5542_c5_g1_i1	238	NC_003627.1 Maize chlorotic mottle virus genomic RNA	4437	97.561	4298	4338	-40	Positive	7.27e-13	TRINITY_DN5769_c3_g1_i14	7117	NC_003398.1 Sugarcane mosaic virus	9596	79.192	7230	572	Negative	0
								TRINITY_DN13045_c0_g1_i1	309	NC_003627.1 Maize chlorotic mottle virus genomic RNA	4437	96.512	4152	4237	-85	Positive	7.26e-34	TRINITY_DN5769_c3_g1_i15	1612	NC_003398.1 Sugarcane mosaic virus	9596	79.905	4735	3479	Negative	0
								TRINITY_DN22166_c0_g1_i1	263	NC_003627.1 Maize chlorotic mottle virus genomic RNA	4437	97.826	3027	2982	45	Negative	1.35e-15	TRINITY_DN5769_c3_g1_i16	8860	NC_003398.1 Sugarcane mosaic virus	9596	79.273	8468	572	Negative	0
								TRINITY_DN20313_c0_g1_i1	282	NC_003627.1 Maize chlorotic mottle virus genomic RNA	4437	95.181	2949	3030	-81	Positive	1.42e-30	TRINITY_DN5769_c3_g1_i16	8860	NC_003398.1 Sugarcane mosaic virus	9596	84.424	8930	8613	Negative	1.61e-83
								TRINITY_DN11350_c0_g1_i1	375	NC_003627.1 Maize chlorotic mottle virus genomic RNA	4437	95.652	1710	1665	45	Negative	3.3e-13	TRINITY_DN5769_c3_g1_i17	7645	NC_003398.1 Sugarcane mosaic virus	9596	79.292	7772	572	Negative	0
								TRINITY_DN4875_c0_g1_i1	292	NC_003627.1 Maize chlorotic mottle virus genomic RNA	4437	97.59	4262	4344	-82	Positive	1.9e-34	TRINITY_DN24393_c0_g1_i1	202	NC_003398.1 Sugarcane mosaic virus	9596	91	369	567	Positive	2e-72
								TRINITY_DN1139_c0_g1_i3	288	NC_003627.1 Maize chlorotic mottle virus genomic RNA	4437	96.154	2145	2248	-103	Positive	8.58e-43
								TRINITY_DN1143_c0_g1_i1	287	NC_003627.1 Maize chlorotic mottle virus genomic RNA	4437	95	3215	3136	79	Negative	1.88e-29
								TRINITY_DN1143_c0_g2_i1	228	NC_003627.1 Maize chlorotic mottle virus genomic RNA	4437	96.429	3219	3136	83	Negative	1.87e-33
								TRINITY_DN1138_c0_g1_i1	247	NC_003627.1 Maize chlorotic mottle virus genomic RNA	4437	97.222	1372	1301	71	Negative	2.06e-28
								TRINITY_DN24008_c0_g1_i1	248	NC_003627.1 Maize chlorotic mottle virus genomic RNA	4437	96.429	1882	1964	-82	Positive	7.39e-33
								TRINITY_DN22543_c0_g1_i1	237	NC_003627.1 Maize chlorotic mottle virus genomic RNA	4437	86.765	214	150	64	Negative	2.01e-13
								TRINITY_DN6671_c0_g1_i1	349	NC_003627.1 Maize chlorotic mottle virus genomic RNA	4437	98.333	3372	3431	-59	Positive	3.02e-23
								TRINITY_DN6640_c0_g1_i1	261	NC_003627.1 Maize chlorotic mottle virus genomic RNA	4437	96.721	310	250	60	Negative	2.85e-22
								TRINITY_DN16596_c0_g1_i1	278	NC_003627.1 Maize chlorotic mottle virus genomic RNA	4437	97.561	2122	2162	-40	Positive	8.61e-13
								TRINITY_DN16531_c0_g1_i1	261	NC_003627.1 Maize chlorotic mottle virus genomic RNA	4437	97.436	844	921	-77	Positive	1.01e-31
								TRINITY_DN8203_c0_g1_i1	293	NC_003627.1 Maize chlorotic mottle virus genomic RNA	4437	97.368	1029	956	73	Negative	5.33e-30
								TRINITY_DN3849_c0_g1_i1	341	NC_003627.1 Maize chlorotic mottle virus genomic RNA	4437	90.099	1822	1917	-95	Positive	2.26e-29
								TRINITY_DN3845_c0_g2_i1	284	NC_003627.1 Maize chlorotic mottle virus genomic RNA	4437	92.793	2680	2571	109	Negative	1.83e-39
								TRINITY_DN5006_c1_g1_i1	211	NC_003627.1 Maize chlorotic mottle virus genomic RNA	4437	99.029	4413	4311	102	Negative	2.18e-47
								TRINITY_DN5046_c0_g1_i2	360	NC_003627.1 Maize chlorotic mottle virus genomic RNA	4437	94.937	2735	2813	-78	Positive	8.61e-29
								TRINITY_DN5014_c0_g1_i1	213	NC_003627.1 Maize chlorotic mottle virus genomic RNA	4437	98.592	4204	4134	70	Negative	1.35e-29
								TRINITY_DN5014_c1_g1_i1	230	NC_003627.1 Maize chlorotic mottle virus genomic RNA	4437	97.436	4182	4220	-38	Positive	3.26e-11
								TRINITY_DN21030_c0_g1_i1	227	NC_003627.1 Maize chlorotic mottle virus genomic RNA	4437	95.238	882	922	-40	Positive	3.21e-11
								TRINITY_DN19217_c0_g1_i1	264	NC_003627.1 Maize chlorotic mottle virus genomic RNA	4437	95.588	2237	2170	67	Negative	1.73e-24
								TRINITY_DN6987_c0_g1_i2	317	NC_003627.1 Maize chlorotic mottle virus genomic RNA	4437	95.833	1809	1762	47	Negative	5.93e-15
								TRINITY_DN2374_c0_g1_i2	418	NC_003627.1 Maize chlorotic mottle virus genomic RNA	4437	100	978	1022	-44	Positive	1.71e-16
								TRINITY_DN2347_c0_g1_i2	218	NC_003627.1 Maize chlorotic mottle virus genomic RNA	4437	96.721	4233	4173	60	Negative	2.34e-22
								TRINITY_DN2754_c0_g1_i1	464	NC_003627.1 Maize chlorotic mottle virus genomic RNA	4437	100	4313	4411	-98	Positive	1.83e-46
								TRINITY_DN2743_c1_g1_i1	217	NC_003627.1 Maize chlorotic mottle virus genomic RNA	4437	98.182	3080	3134	-54	Positive	1.08e-20
								TRINITY_DN15777_c0_g1_i1	238	NC_003627.1 Maize chlorotic mottle virus genomic RNA	4437	100	3470	3434	36	Negative	2.61e-12
								TRINITY_DN15726_c0_g1_i1	250	NC_003627.1 Maize chlorotic mottle virus genomic RNA	4437	97.143	4170	4204	-34	Positive	1.66e-09
								TRINITY_DN28065_c0_g1_i1	210	NC_003627.1 Maize chlorotic mottle virus genomic RNA	4437	96.104	3024	2949	75	Negative	4.79e-29
								TRINITY_DN19735_c0_g1_i1	225	NC_003627.1 Maize chlorotic mottle virus genomic RNA	4437	91.111	922	879	43	Negative	5.32e-09
								TRINITY_DN5248_c0_g1_i1	394	NC_003627.1 Maize chlorotic mottle virus genomic RNA	4437	98.182	3539	3593	-54	Positive	2.06e-20
								TRINITY_DN7132_c0_g1_i1	271	NC_003627.1 Maize chlorotic mottle virus genomic RNA	4437	96	4174	4223	-49	Positive	3.87e-16
								TRINITY_DN8574_c0_g1_i2	381	NC_003627.1 Maize chlorotic mottle virus genomic RNA	4437	92.982	3861	3916	-55	Positive	5.58e-16
								TRINITY_DN26143_c0_g1_i1	272	NC_003627.1 Maize chlorotic mottle virus genomic RNA	4437	97.403	3025	2949	76	Negative	3.8e-31
								TRINITY_DN1893_c0_g1_i1	304	NC_003627.1 Maize chlorotic mottle virus genomic RNA	4437	98.077	4230	4179	51	Negative	2.62e-18
								TRINITY_DN4674_c0_g1_i1	383	NC_003627.1 Maize chlorotic mottle virus genomic RNA	4437	100	567	531	36	Negative	4.37e-12
								TRINITY_DN13514_c0_g1_i1	220	NC_003627.1 Maize chlorotic mottle virus genomic RNA	4437	97.436	1547	1509	38	Negative	8.62e-12
								TRINITY_DN13515_c0_g1_i1	265	NC_003627.1 Maize chlorotic mottle virus genomic RNA	4437	97.5	3311	3390	-79	Positive	7.95e-33
								TRINITY_DN25900_c0_g1_i1	226	NC_003627.1 Maize chlorotic mottle virus genomic RNA	4437	97.531	922	842	80	Negative	1.85e-33
								TRINITY_DN12596_c0_g1_i1	287	NC_003627.1 Maize chlorotic mottle virus genomic RNA	4437	98.592	959	1029	-70	Positive	1.88e-29
								TRINITY_DN4598_c2_g1_i2	291	NC_003627.1 Maize chlorotic mottle virus genomic RNA	4437	94.545	4239	4348	-109	Positive	3.12e-42
								TRINITY_DN454_c0_g1_i1	207	NC_003627.1 Maize chlorotic mottle virus genomic RNA	4437	92.453	137	85	52	Negative	1.34e-14
								TRINITY_DN5471_c6_g3_i1	511	NC_003627.1 Maize chlorotic mottle virus genomic RNA	4437	96.552	3394	3450	-56	Positive	9.74e-20
								TRINITY_DN5496_c6_g1_i1	252	NC_003627.1 Maize chlorotic mottle virus genomic RNA	4437	100	4307	4414	-107	Positive	9.46e-52
								TRINITY_DN17355_c0_g1_i1	255	NC_003627.1 Maize chlorotic mottle virus genomic RNA	4437	100	653	697	-44	Positive	1.01e-16
								TRINITY_DN5691_c8_g2_i6	681	NC_003627.1 Maize chlorotic mottle virus genomic RNA	4437	96.875	3146	3209	-63	Positive	1.69e-23
								TRINITY_DN5628_c2_g1_i1	203	NC_003627.1 Maize chlorotic mottle virus genomic RNA	4437	98.276	878	935	-57	Positive	2.16e-22
								TRINITY_DN5694_c9_g1_i8	224	NC_003627.1 Maize chlorotic mottle virus genomic RNA	4437	99.02	4414	4313	101	Negative	8.37e-47
								TRINITY_DN5699_c3_g1_i1	212	NC_003627.1 Maize chlorotic mottle virus genomic RNA	4437	96.396	2623	2733	-110	Positive	7.87e-47
								TRINITY_DN5699_c3_g1_i2	310	NC_003627.1 Maize chlorotic mottle virus genomic RNA	4437	95.288	2623	2813	-190	Positive	8.77e-83
								TRINITY_DN5630_c0_g2_i9	223	NC_003627.1 Maize chlorotic mottle virus genomic RNA	4437	94.203	3146	3213	-67	Positive	6.67e-23
								TRINITY_DN2803_c0_g1_i1	273	NC_003627.1 Maize chlorotic mottle virus genomic RNA	4437	95.238	2862	2800	62	Negative	1.08e-21
								TRINITY_DN1682_c0_g1_i1	368	NC_003627.1 Maize chlorotic mottle virus genomic RNA	4437	95.833	2418	2347	71	Negative	1.47e-26
								TRINITY_DN15015_c0_g1_i1	222	NC_003627.1 Maize chlorotic mottle virus genomic RNA	4437	95.122	3420	3380	40	Negative	3.13e-11
								TRINITY_DN6386_c0_g1_i1	228	NC_003627.1 Maize chlorotic mottle virus genomic RNA	4437	100	4059	4097	-38	Positive	1.93e-13
								TRINITY_DN30082_c0_g1_i1	480	NC_003627.1 Maize chlorotic mottle virus genomic RNA	4437	99.123	508	620	-112	Positive	1.45e-52
								TRINITY_DN10511_c0_g1_i1	259	NC_003627.1 Maize chlorotic mottle virus genomic RNA	4437	100	951	1026	-75	Positive	5.99e-34
								TRINITY_DN18376_c0_g1_i1	272	NC_003627.1 Maize chlorotic mottle virus genomic RNA	4437	86.567	356	290	66	Negative	2.34e-13
								TRINITY_DN7082_c0_g1_i2	255	NC_003627.1 Maize chlorotic mottle virus genomic RNA	4437	96.04	3340	3438	-98	Positive	1.26e-40
								TRINITY_DN26310_c0_g1_i1	267	NC_003627.1 Maize chlorotic mottle virus genomic RNA	4437	95.294	1611	1695	-84	Positive	2.88e-32
								TRINITY_DN9969_c0_g1_i1	213	NC_003627.1 Maize chlorotic mottle virus genomic RNA	4437	94.872	3389	3426	-37	Positive	1.39e-09
								TRINITY_DN11170_c0_g1_i1	252	NC_003627.1 Maize chlorotic mottle virus genomic RNA	4437	97.727	2085	2042	43	Negative	1.66e-14
								TRINITY_DN7478_c0_g1_i1	283	NC_003627.1 Maize chlorotic mottle virus genomic RNA	4437	93.651	2782	2844	-62	Positive	5.21e-20
								TRINITY_DN29166_c0_g1_i1	237	NC_003627.1 Maize chlorotic mottle virus genomic RNA	4437	91.667	2968	3038	-70	Positive	3.32e-21
								TRINITY_DN1359_c0_g1_i1	260	NC_003627.1 Maize chlorotic mottle virus genomic RNA	4437	99.099	638	528	110	Negative	9.79e-52
								TRINITY_DN1359_c0_g1_i2	248	NC_003627.1 Maize chlorotic mottle virus genomic RNA	4437	100	619	528	91	Negative	7.29e-43
								TRINITY_DN1373_c0_g1_i1	254	NC_003627.1 Maize chlorotic mottle virus genomic RNA	4437	97.297	914	879	35	Negative	4.7e-10
								TRINITY_DN1344_c0_g1_i2	266	NC_003627.1 Maize chlorotic mottle virus genomic RNA	4437	93.75	3212	3118	94	Negative	1.72e-34
								TRINITY_DN1264_c0_g1_i1	222	NC_003627.1 Maize chlorotic mottle virus genomic RNA	4437	91.379	2864	2753	111	Negative	1.81e-38
								TRINITY_DN1264_c0_g1_i2	286	NC_003627.1 Maize chlorotic mottle virus genomic RNA	4437	91.818	2861	2753	108	Negative	3.08e-37
								TRINITY_DN6109_c0_g1_i1	224	NC_003627.1 Maize chlorotic mottle virus genomic RNA	4437	97.959	3169	3217	-48	Positive	2.43e-17
								TRINITY_DN5316_c1_g1_i5	454	NC_003627.1 Maize chlorotic mottle virus genomic RNA	4437	96.296	2990	3043	-53	Positive	1.44e-17
								TRINITY_DN5374_c0_g1_i1	205	NC_003627.1 Maize chlorotic mottle virus genomic RNA	4437	97.872	3283	3376	-93	Positive	9.87e-41
								TRINITY_DN5374_c0_g1_i2	216	NC_003627.1 Maize chlorotic mottle virus genomic RNA	4437	96.396	3283	3391	-108	Positive	2.89e-46
								TRINITY_DN5374_c0_g1_i3	208	NC_003627.1 Maize chlorotic mottle virus genomic RNA	4437	97.059	3283	3384	-101	Positive	1.67e-43
								TRINITY_DN5374_c0_g2_i1	234	NC_003627.1 Maize chlorotic mottle virus genomic RNA	4437	94.186	3283	3368	-85	Positive	1.16e-30
								TRINITY_DN5367_c0_g1_i1	415	NC_003627.1 Maize chlorotic mottle virus genomic RNA	4437	96	150	223	-73	Positive	1.29e-27
								TRINITY_DN16081_c0_g1_i1	290	NC_003627.1 Maize chlorotic mottle virus genomic RNA	4437	92.135	2823	2735	88	Negative	6.82e-29
								TRINITY_DN4261_c0_g1_i1	220	NC_003627.1 Maize chlorotic mottle virus genomic RNA	4437	96.875	903	809	94	Negative	1.38e-39
								TRINITY_DN4261_c0_g2_i1	251	NC_003627.1 Maize chlorotic mottle virus genomic RNA	4437	96.97	842	777	65	Negative	4.54e-25
								TRINITY_DN4261_c0_g1_i2	345	NC_003627.1 Maize chlorotic mottle virus genomic RNA	4437	93.007	914	777	137	Negative	1.03e-52
								TRINITY_DN5866_c3_g2_i1	441	NC_003627.1 Maize chlorotic mottle virus genomic RNA	4437	94.545	2271	2325	-54	Positive	5.02e-17
								TRINITY_DN5866_c3_g6_i6	575	NC_003627.1 Maize chlorotic mottle virus genomic RNA	4437	95.699	120	212	-92	Positive	2.32e-36
								TRINITY_DN5894_c4_g2_i7	326	NC_003627.1 Maize chlorotic mottle virus genomic RNA	4437	94.393	3775	3669	106	Negative	4.56e-41
								TRINITY_DN5863_c3_g8_i2	367	NC_003627.1 Maize chlorotic mottle virus genomic RNA	4437	94.444	931	842	89	Negative	3.14e-33
								TRINITY_DN5820_c1_g1_i7	404	NC_003627.1 Maize chlorotic mottle virus genomic RNA	4437	97.059	539	571	-32	Positive	3.6e-08
								TRINITY_DN5852_c11_g4_i1	240	NC_003627.1 Maize chlorotic mottle virus genomic RNA	4437	96.203	497	574	-77	Positive	4.29e-30
								TRINITY_DN5823_c12_g2_i1	334	NC_003627.1 Maize chlorotic mottle virus genomic RNA	4437	98.851	2531	2445	86	Negative	2.82e-38
								TRINITY_DN5842_c18_g1_i2	727	NC_003627.1 Maize chlorotic mottle virus genomic RNA	4437	96.386	814	896	-82	Positive	2.3e-32
								TRINITY_DN5856_c6_g1_i3	544	NC_003627.1 Maize chlorotic mottle virus genomic RNA	4437	96.241	4419	4288	131	Negative	2.13e-56
								TRINITY_DN5846_c3_g1_i15	420	NC_003627.1 Maize chlorotic mottle virus genomic RNA	4437	100	4340	4412	-72	Positive	4.68e-32
								TRINITY_DN18422_c0_g1_i1	280	NC_003627.1 Maize chlorotic mottle virus genomic RNA	4437	92.857	3126	3086	40	Negative	1.88e-09
								TRINITY_DN10900_c0_g1_i1	222	NC_003627.1 Maize chlorotic mottle virus genomic RNA	4437	100	4398	4358	40	Negative	1.45e-14
								TRINITY_DN10221_c0_g1_i1	326	NC_003627.1 Maize chlorotic mottle virus genomic RNA	4437	100	817	845	-28	Positive	1.03e-07
								TRINITY_DN18946_c0_g1_i1	364	NC_003627.1 Maize chlorotic mottle virus genomic RNA	4437	96.552	797	883	-86	Positive	6.68e-35
								TRINITY_DN18298_c0_g1_i2	318	NC_003627.1 Maize chlorotic mottle virus genomic RNA	4437	92.727	2626	2572	54	Negative	5.95e-15
								TRINITY_DN23855_c0_g1_i1	223	NC_003627.1 Maize chlorotic mottle virus genomic RNA	4437	97.778	134	90	44	Negative	4.04e-15
								TRINITY_DN23897_c0_g1_i1	272	NC_003627.1 Maize chlorotic mottle virus genomic RNA	4437	90.769	250	314	-64	Positive	3e-17
								TRINITY_DN29244_c0_g1_i1	379	NC_003627.1 Maize chlorotic mottle virus genomic RNA	4437	95.89	2786	2858	-72	Positive	4.23e-27
								TRINITY_DN11433_c0_g1_i1	257	NC_003627.1 Maize chlorotic mottle virus genomic RNA	4437	97.778	4168	4212	-44	Positive	4.72e-15
								TRINITY_DN3405_c0_g1_i1	221	NC_003627.1 Maize chlorotic mottle virus genomic RNA	4437	95.238	3036	2954	82	Negative	3.03e-31
								TRINITY_DN4916_c0_g1_i1	294	NC_003627.1 Maize chlorotic mottle virus genomic RNA	4437	95.385	146	17	129	Negative	6.68e-54
								TRINITY_DN4980_c0_g3_i1	333	NC_003627.1 Maize chlorotic mottle virus genomic RNA	4437	95.349	130	215	-85	Positive	1.02e-32
								TRINITY_DN26652_c0_g1_i1	262	NC_003627.1 Maize chlorotic mottle virus genomic RNA	4437	98.969	4394	4298	96	Negative	5.98e-44
								TRINITY_DN18022_c0_g1_i1	311	NC_003627.1 Maize chlorotic mottle virus genomic RNA	4437	93.162	2735	2851	-116	Positive	2.59e-43
								TRINITY_DN5705_c6_g1_i1	207	NC_003627.1 Maize chlorotic mottle virus genomic RNA	4437	96.25	1826	1905	-79	Positive	2.81e-31
								TRINITY_DN5740_c0_g1_i2	245	NC_003627.1 Maize chlorotic mottle virus genomic RNA	4437	100	947	1017	-70	Positive	3.39e-31
								TRINITY_DN5767_c4_g2_i1	263	NC_003627.1 Maize chlorotic mottle virus genomic RNA	4437	94.175	2938	3039	-101	Positive	2.18e-38
								TRINITY_DN5768_c25_g1_i1	204	NC_003627.1 Maize chlorotic mottle virus genomic RNA	4437	100	1774	1807	-33	Positive	1.02e-10
								TRINITY_DN20064_c0_g1_i1	272	NC_003627.1 Maize chlorotic mottle virus genomic RNA	4437	98.649	2954	3027	-73	Positive	3.8e-31
								TRINITY_DN673_c1_g1_i1	253	NC_003627.1 Maize chlorotic mottle virus genomic RNA	4437	95.294	814	898	-84	Positive	2.72e-32
								TRINITY_DN697_c1_g1_i1	206	NC_003627.1 Maize chlorotic mottle virus genomic RNA	4437	95.604	2704	2794	-90	Positive	1e-35
								TRINITY_DN5193_c0_g2_i1	461	NC_003627.1 Maize chlorotic mottle virus genomic RNA	4437	94.667	234	308	-74	Positive	1.87e-26
								TRINITY_DN17697_c0_g1_i1	292	NC_003627.1 Maize chlorotic mottle virus genomic RNA	4437	95.604	1629	1719	-90	Positive	1.47e-35
								TRINITY_DN27212_c0_g1_i1	246	NC_003627.1 Maize chlorotic mottle virus genomic RNA	4437	95.062	1828	1908	-80	Positive	4.41e-30
								TRINITY_DN27222_c0_g1_i1	416	NC_003627.1 Maize chlorotic mottle virus genomic RNA	4437	95.122	4101	4222	-121	Positive	2.71e-49
								TRINITY_DN180_c0_g1_i1	236	NC_003627.1 Maize chlorotic mottle virus genomic RNA	4437	98.901	4108	4198	-90	Positive	1.15e-40
								TRINITY_DN24877_c0_g1_i1	397	NC_003627.1 Maize chlorotic mottle virus genomic RNA	4437	100	3429	3376	53	Negative	1.61e-21
								TRINITY_DN9534_c0_g1_i1	258	NC_003627.1 Maize chlorotic mottle virus genomic RNA	4437	96.667	856	915	-59	Positive	1.01e-21
								TRINITY_DN19380_c0_g1_i1	557	NC_003627.1 Maize chlorotic mottle virus genomic RNA	4437	95	2011	1912	99	Negative	1.34e-38
								TRINITY_DN29330_c0_g1_i1	362	NC_003627.1 Maize chlorotic mottle virus genomic RNA	4437	94.4	2850	2974	-124	Positive	2.34e-49
								TRINITY_DN21535_c0_g1_i1	260	NC_003627.1 Maize chlorotic mottle virus genomic RNA	4437	100	1360	1324	36	Negative	2.88e-12
								TRINITY_DN16001_c0_g1_i1	232	NC_003627.1 Maize chlorotic mottle virus genomic RNA	4437	97.674	551	509	42	Negative	5.46e-14
								TRINITY_DN6029_c2_g1_i1	770	NC_003627.1 Maize chlorotic mottle virus genomic RNA	4437	96.842	1933	1839	94	Negative	5.21e-39
								TRINITY_DN6062_c4_g4_i3	286	NC_003627.1 Maize chlorotic mottle virus genomic RNA	4437	97.619	1361	1320	41	Negative	2.47e-13
								TRINITY_DN6041_c14_g1_i34	436	NC_003627.1 Maize chlorotic mottle virus genomic RNA	4437	97.436	2317	2279	38	Negative	1.8e-11
								TRINITY_DN6009_c20_g1_i1	321	NC_003627.1 Maize chlorotic mottle virus genomic RNA	4437	90.164	2989	3046	-57	Positive	2.16e-14
								TRINITY_DN6072_c12_g1_i3	782	NC_003627.1 Maize chlorotic mottle virus genomic RNA	4437	97.872	973	1019	-46	Positive	1.18e-15
								TRINITY_DN6060_c12_g3_i4	396	NC_003627.1 Maize chlorotic mottle virus genomic RNA	4437	97.403	882	806	76	Negative	5.69e-31
								TRINITY_DN6078_c12_g3_i1	258	NC_003627.1 Maize chlorotic mottle virus genomic RNA	4437	94.915	2192	2309	-117	Positive	2.72e-47
								TRINITY_DN6036_c7_g4_i7	276	NC_003627.1 Maize chlorotic mottle virus genomic RNA	4437	97.938	815	911	-96	Positive	2.95e-42
								TRINITY_DN6076_c3_g6_i4	239	NC_003627.1 Maize chlorotic mottle virus genomic RNA	4437	94.253	2288	2202	86	Negative	9.18e-32
								TRINITY_DN6081_c8_g1_i20	241	NC_003627.1 Maize chlorotic mottle virus genomic RNA	4437	92.784	4133	4229	-96	Positive	1.99e-33
								TRINITY_DN6096_c48_g1_i1	267	NC_003627.1 Maize chlorotic mottle virus genomic RNA	4437	97.619	929	804	125	Negative	1e-56
								TRINITY_DN6096_c48_g1_i2	212	NC_003627.1 Maize chlorotic mottle virus genomic RNA	4437	100	1023	902	121	Negative	1.29e-59
								TRINITY_DN6096_c48_g2_i1	232	NC_003627.1 Maize chlorotic mottle virus genomic RNA	4437	94.118	1389	1323	66	Negative	2.51e-22
								TRINITY_DN6096_c48_g3_i1	225	NC_003627.1 Maize chlorotic mottle virus genomic RNA	4437	94.382	4067	3980	87	Negative	8.59e-32
								TRINITY_DN6096_c48_g1_i3	238	NC_003627.1 Maize chlorotic mottle virus genomic RNA	4437	100	1026	902	124	Negative	3.15e-61
								TRINITY_DN6096_c48_g1_i4	239	NC_003627.1 Maize chlorotic mottle virus genomic RNA	4437	98.519	2567	2433	134	Negative	1.89e-63
								TRINITY_DN6096_c48_g1_i5	1321	NC_003627.1 Maize chlorotic mottle virus genomic RNA	4437	97.183	4415	3280	1135	Negative	0
								TRINITY_DN6096_c48_g1_i6	4468	NC_003627.1 Maize chlorotic mottle virus genomic RNA	4437	96.661	4415	14	4401	Negative	0
								TRINITY_DN6096_c48_g1_i7	233	NC_003627.1 Maize chlorotic mottle virus genomic RNA	4437	96.117	1458	1356	102	Negative	2.45e-42
								TRINITY_DN6096_c48_g1_i8	332	NC_003627.1 Maize chlorotic mottle virus genomic RNA	4437	97.11	335	164	171	Negative	7.35e-79
								TRINITY_DN6096_c48_g1_i9	656	NC_003627.1 Maize chlorotic mottle virus genomic RNA	4437	97.973	4415	3972	443	Negative	0
								TRINITY_DN6096_c48_g1_i10	227	NC_003627.1 Maize chlorotic mottle virus genomic RNA	4437	97.059	1811	1710	101	Negative	1.84e-43
								TRINITY_DN6096_c48_g4_i1	203	NC_003627.1 Maize chlorotic mottle virus genomic RNA	4437	97.059	230	164	66	Negative	9.97e-26
								TRINITY_DN6096_c48_g1_i11	980	NC_003627.1 Maize chlorotic mottle virus genomic RNA	4437	96.588	4415	3566	849	Negative	0
								TRINITY_DN6096_c48_g1_i12	3555	NC_003627.1 Maize chlorotic mottle virus genomic RNA	4437	96.57	3424	14	3410	Negative	0
								TRINITY_DN6096_c48_g1_i13	4560	NC_003627.1 Maize chlorotic mottle virus genomic RNA	4437	96.659	4413	14	4399	Negative	0
								TRINITY_DN6096_c48_g1_i14	242	NC_003627.1 Maize chlorotic mottle virus genomic RNA	4437	96.97	1808	1710	98	Negative	9.18e-42
								TRINITY_DN20508_c0_g1_i1	408	NC_003627.1 Maize chlorotic mottle virus genomic RNA	4437	94.595	575	465	110	Negative	3.46e-43
								TRINITY_DN3155_c0_g1_i1	259	NC_003627.1 Maize chlorotic mottle virus genomic RNA	4437	97.03	4110	4010	100	Negative	7.64e-43
								TRINITY_DN2646_c0_g1_i1	212	NC_003627.1 Maize chlorotic mottle virus genomic RNA	4437	95.238	4194	4235	-41	Positive	2.97e-11
								TRINITY_DN14097_c0_g1_i1	257	NC_003627.1 Maize chlorotic mottle virus genomic RNA	4437	94.203	3303	3371	-68	Positive	2.17e-23
								TRINITY_DN3247_c2_g1_i1	201	NC_003627.1 Maize chlorotic mottle virus genomic RNA	4437	100	3428	3381	47	Negative	1.66e-18
								TRINITY_DN1541_c0_g1_i1	290	NC_003627.1 Maize chlorotic mottle virus genomic RNA	4437	98	1297	1346	-49	Positive	8.95e-18
								TRINITY_DN23694_c0_g1_i1	480	NC_003627.1 Maize chlorotic mottle virus genomic RNA	4437	98.165	4307	4415	-108	Positive	1.13e-48
								TRINITY_DN21394_c0_g1_i1	414	NC_003627.1 Maize chlorotic mottle virus genomic RNA	4437	94.318	2289	2202	87	Negative	4.61e-32
								TRINITY_DN2096_c0_g1_i1	225	NC_003627.1 Maize chlorotic mottle virus genomic RNA	4437	94.595	574	539	35	Negative	1.91e-08
								TRINITY_DN2093_c0_g1_i1	236	NC_003627.1 Maize chlorotic mottle virus genomic RNA	4437	97.368	878	915	-37	Positive	3.35e-11
								TRINITY_DN19637_c0_g1_i1	342	NC_003627.1 Maize chlorotic mottle virus genomic RNA	4437	94.444	2458	2388	70	Negative	2.28e-24
								TRINITY_DN6264_c0_g1_i1	320	NC_003627.1 Maize chlorotic mottle virus genomic RNA	4437	95.283	1706	1601	105	Negative	3.46e-42
								TRINITY_DN15196_c0_g1_i1	254	NC_003627.1 Maize chlorotic mottle virus genomic RNA	4437	91.139	2247	2325	-78	Positive	2.14e-23
								TRINITY_DN3925_c0_g1_i1	244	NC_003627.1 Maize chlorotic mottle virus genomic RNA	4437	97.279	2572	2428	144	Negative	3.21e-66
								TRINITY_DN3925_c0_g1_i2	206	NC_003627.1 Maize chlorotic mottle virus genomic RNA	4437	100	2532	2428	104	Negative	3.52e-50
								TRINITY_DN715_c0_g1_i1	224	NC_003627.1 Maize chlorotic mottle virus genomic RNA	4437	94.545	4342	4288	54	Negative	2.43e-17
								TRINITY_DN715_c0_g2_i1	202	NC_003627.1 Maize chlorotic mottle virus genomic RNA	4437	96.063	4414	4288	126	Negative	4.42e-54
								TRINITY_DN26831_c0_g1_i1	267	NC_003627.1 Maize chlorotic mottle virus genomic RNA	4437	100	923	886	37	Negative	8.24e-13
								Maize chlorotic mottle virus										Sugarcane mosaic virus									Maize streak virus									Maize yellow dwarf virus-RMV2									Maize yellow dwarf virus-RMV
Researcher	Sample	Host	Total	Total	Unique_Contigs	Total	Contigs	Conting	Conting	Reference	Reference	%	Coordinates			Polarity	E	Conting	Conting	Reference	Reference	%	Coordinates		Polarity	E	Conting	Conting	Reference	Reference	%	Coordinates		Polarity	E	Conting	Conting	Reference	Reference	%	Coordinates		Polarity	E	Conting	Conting	Reference	Reference	%
		Maize Leaf	Sequences	Contigs	matching to Virus	virus	Unmatch_to _PVGDB/NCBI		Length		Length	identity	Start	End			value		Length		Length	identity	Start	End		value		Length		Length	identity	Start	End		value		Length		Length	identity	Start	End		value		Length		Length	identity
DNS	22		682940	737	12	4	36	TRINITY_DN59_c1_g5_i1	2810	NC_003627.1 Maize chlorotic mottle virus genomic RNA	4437	96.619	4409	1600	2809	Negative	0	TRINITY_DN348_c0_g1_i1	446	NC_003398.1 Sugarcane mosaic virus	9596	84.884	9041	8613	Negative	1.58e-121	TRINITY_DN66_c0_g1_i1	1953	NC_001346.2 Maize streak virus - A[Ama]	2689	98.452	1680	1	Negative	0	TRINITY_DN135_c0_g1_i1	1518	NC_029990.1 Maize yellow dwarf virus-RMV2	5625	97.76	292	1809	Positive	0	TRINITY_DN365_c0_g1_i1	388	NC_021484.1 Maize yellow dwarf virus-RMV	5612	86.632
DNS	22							TRINITY_DN59_c1_g4_i1	1611	NC_003627.1 Maize chlorotic mottle virus genomic RNA	4437	96.772	14	1624	-1610	Positive	0	TRINITY_DN389_c0_g1_i1	225	NC_003398.1 Sugarcane mosaic virus	9596	88.889	4686	4462	Negative	3.75e-75	TRINITY_DN66_c0_g1_i1	1953	NC_001346.2 Maize streak virus - A[Ama]	2689	98.162	2689	2418	Negative	1.18e-133	TRINITY_DN133_c0_g1_i1	878	NC_029990.1 Maize yellow dwarf virus-RMV2	5625	95.553	4521	5397	Positive	0
DNS	22							TRINITY_DN59_c1_g4_i2	301	NC_003627.1 Maize chlorotic mottle virus genomic RNA	4437	98.851	1433	1606	-173	Positive	5.08e-85																			TRINITY_DN347_c0_g1_i1	481	NC_029990.1 Maize yellow dwarf virus-RMV2	5625	98.129	3169	3649	Positive	0
DNS	22																																			TRINITY_DN365_c0_g1_i1	388	NC_029990.1 Maize yellow dwarf virus-RMV2	5625	97.68	2168	2555	Positive	0
DNS	22																																			TRINITY_DN329_c0_g1_i1	254	NC_029990.1 Maize yellow dwarf virus-RMV2	5625	93.701	4203	4456	Positive	3.17e-106
DNS	22																																			TRINITY_DN211_c0_g1_i1	234	NC_029990.1 Maize yellow dwarf virus-RMV2	5625	99.138	2892	3123	Positive	2.21e-117
DNS	22
DNS	22
								Maize chlorotic mottle virus										Sugarcane mosaic virus									Maize streak virus									Hubei Poty-like virus 1 strain SCM51506 polyprotein gene									Scallion mosaic virus
Researcher	Sample	Host	Total	Total	Unique_Contigs	Total	Contigs	Conting	Conting	Reference	Reference	%	Coordinates			Polarity	E	Conting	Conting	Reference	Reference	%	Coordinates		Polarity	E	Conting	Conting	Reference	Reference	%	Coordinates		Polarity	E	Conting	Conting	Reference	Reference	%	Coordinates		Polarity	E	Conting	Conting	Reference	Reference	%
		Maize Leaf	Sequences	Contigs	matching to Virus	virus	Unmatch_to _PVGDB/NCBI		Length		Length	identity	Start	End			value		Length		Length	identity	Start	End		value		Length		Length	identity	Start	End		value		Length		Length	identity	Start	End		value		Length		Length	identity
DNS	23		959933	50159	292	7	12020	TRINITY_DN15632_c0_g1_i1	229	NC_003627.1 Maize chlorotic mottle virus genomic RNA	4437	94.34	930	879		Negative	1.16e-15	TRINITY_DN6683_c1_g1_i2	3036	NC_003398.1 Sugarcane mosaic virus	9596	87.777	9554	8613	Negative	0	TRINITY_DN14138_c0_g1_i1	793	NC_001346.2 Maize streak virus - A[Ama]	2689	97.913	1	623	Positive	0	TRINITY_DN6683_c1_g1_i9	2923	NC_032912.1 Hubei Poty-like virus 1 strain SCM51506 polyprotein gene	9356	77.108	7779	5915	Negative	0	TRINITY_DN6683_c1_g1_i8	961	NC_003399.1 Scallion mosaic virus	9324	71.612
DNS	23							TRINITY_DN5970_c1_g3_i1	326	NC_003627.1 Maize chlorotic mottle virus genomic RNA	4437	93.617	1900	1945		Positive	3.68e-12	TRINITY_DN6683_c1_g1_i4	2698	NC_003398.1 Sugarcane mosaic virus	9596	87.342	9554	8613	Negative	0	TRINITY_DN14138_c0_g1_i1	793	NC_001346.2 Maize streak virus - A[Ama]	2689	98.235	2520	2689	Positive	1.09e-80
DNS	23							TRINITY_DN5970_c1_g5_i1	326	NC_003627.1 Maize chlorotic mottle virus genomic RNA	4437	93.617	1945	1900		Negative	3.68e-12	TRINITY_DN6683_c1_g1_i5	6598	NC_003398.1 Sugarcane mosaic virus	9596	84.266	8474	2983	Negative	0	TRINITY_DN15122_c0_g1_i1	661	NC_001346.2 Maize streak virus - A[Ama]	2689	98.036	1837	1176	Negative	0
DNS	23							TRINITY_DN5926_c0_g1_i2	436	NC_003627.1 Maize chlorotic mottle virus genomic RNA	4437	98.507	3401	3335		Negative	4.89e-27	TRINITY_DN6683_c1_g1_i5	6598	NC_003398.1 Sugarcane mosaic virus	9596	87.777	9554	8613	Negative	0	TRINITY_DN7363_c0_g1_i1	520	NC_001346.2 Maize streak virus - A[Ama]	2689	99.231	663	1182	Positive	0
DNS	23							TRINITY_DN5948_c1_g1_i1	235	NC_003627.1 Maize chlorotic mottle virus genomic RNA	4437	95.876	909	813		Negative	5.35e-39	TRINITY_DN6683_c1_g1_i6	2588	NC_003398.1 Sugarcane mosaic virus	9596	87.342	9554	8613	Negative	0
DNS	23							TRINITY_DN5948_c1_g1_i2	219	NC_003627.1 Maize chlorotic mottle virus genomic RNA	4437	97.753	901	813		Negative	6.4e-38	TRINITY_DN6683_c1_g2_i1	4696	NC_003398.1 Sugarcane mosaic virus	9596	78.215	18	4713	Positive	0
DNS	23							TRINITY_DN5948_c1_g1_i3	345	NC_003627.1 Maize chlorotic mottle virus genomic RNA	4437	97.368	926	813		Negative	6.18e-50	TRINITY_DN6683_c1_g2_i2	745	NC_003398.1 Sugarcane mosaic virus	9596	88.934	2262	3002	Positive	0
DNS	23							TRINITY_DN5948_c1_g1_i4	226	NC_003627.1 Maize chlorotic mottle virus genomic RNA	4437	97.619	896	813		Negative	3.99e-35	TRINITY_DN6683_c1_g1_i10	250	NC_003398.1 Sugarcane mosaic virus	9596	84.848	8840	8676	Negative	9.51e-42
								TRINITY_DN5948_c2_g1_i1	233	NC_003627.1 Maize chlorotic mottle virus genomic RNA	4437	95.556	791	702		Negative	1.48e-34	TRINITY_DN6683_c1_g1_i12	4891	NC_003398.1 Sugarcane mosaic virus	9596	87.777	9554	8613	Negative	0
								TRINITY_DN5965_c2_g6_i2	250	NC_003627.1 Maize chlorotic mottle virus genomic RNA	4437	98.901	2949	3039		Positive	1.23e-40	TRINITY_DN5374_c0_g1_i1	838	NC_003398.1 Sugarcane mosaic virus	9596	92.109	28	798	Positive	0
								TRINITY_DN5575_c1_g2_i1	204	NC_003627.1 Maize chlorotic mottle virus genomic RNA	4437	96.907	4031	4127		Positive	9.82e-41	TRINITY_DN5374_c0_g1_i2	2270	NC_003398.1 Sugarcane mosaic virus	9596	90.961	28	2294	Positive	0
								TRINITY_DN5573_c0_g1_i2	444	NC_003627.1 Maize chlorotic mottle virus genomic RNA	4437	94.253	2288	2202		Negative	1.78e-31	TRINITY_DN1779_c0_g1_i1	440	NC_003398.1 Sugarcane mosaic virus	9596	92.727	8830	9269	Positive	0
								TRINITY_DN18724_c0_g1_i1	309	NC_003627.1 Maize chlorotic mottle virus genomic RNA	4437	95.798	926	810		Negative	7.1e-49
								TRINITY_DN19453_c0_g1_i1	238	NC_003627.1 Maize chlorotic mottle virus genomic RNA	4437	96.364	856	910		Positive	5.58e-19
								TRINITY_DN6413_c4_g1_i1	700	NC_003627.1 Maize chlorotic mottle virus genomic RNA	4437	97.6	210	334		Positive	9.94e-56
								TRINITY_DN6413_c10_g1_i1	224	NC_003627.1 Maize chlorotic mottle virus genomic RNA	4437	96.296	2316	2396		Positive	8.55e-32
								TRINITY_DN6446_c5_g1_i2	249	NC_003627.1 Maize chlorotic mottle virus genomic RNA	4437	100	1779	1807		Positive	7.69e-08
								TRINITY_DN6446_c7_g1_i1	203	NC_003627.1 Maize chlorotic mottle virus genomic RNA	4437	100	3423	3380		Negative	2.81e-16
								TRINITY_DN6429_c1_g1_i1	342	NC_003627.1 Maize chlorotic mottle virus genomic RNA	4437	95.238	2205	2288		Positive	1.35e-31
								TRINITY_DN6493_c1_g1_i1	288	NC_003627.1 Maize chlorotic mottle virus genomic RNA	4437	96.429	2972	3055		Positive	2.42e-33
								TRINITY_DN6412_c5_g1_i1	204	NC_003627.1 Maize chlorotic mottle virus genomic RNA	4437	94.059	2798	2699		Negative	2.13e-37
								TRINITY_DN6450_c5_g2_i2	256	NC_003627.1 Maize chlorotic mottle virus genomic RNA	4437	96.364	1875	1821		Negative	6.04e-19
								TRINITY_DN6438_c3_g1_i1	218	NC_003627.1 Maize chlorotic mottle virus genomic RNA	4437	95.522	1677	1544		Negative	2.88e-56
								TRINITY_DN6415_c8_g1_i1	553	NC_003627.1 Maize chlorotic mottle virus genomic RNA	4437	95.455	2228	2271		Positive	1.78e-12
								TRINITY_DN6427_c2_g1_i1	232	NC_003627.1 Maize chlorotic mottle virus genomic RNA	4437	96.809	3137	3044		Negative	5.27e-39
								TRINITY_DN6477_c7_g1_i1	223	NC_003627.1 Maize chlorotic mottle virus genomic RNA	4437	96.396	4157	4047		Negative	8.32e-47
								TRINITY_DN6477_c7_g2_i1	246	NC_003627.1 Maize chlorotic mottle virus genomic RNA	4437	100	4227	4186		Negative	4.5e-15
								TRINITY_DN6477_c7_g3_i1	283	NC_003627.1 Maize chlorotic mottle virus genomic RNA	4437	97.727	4215	4128		Negative	3.05e-37
								TRINITY_DN6478_c2_g5_i1	234	NC_003627.1 Maize chlorotic mottle virus genomic RNA	4437	100	4351	4411		Positive	1.17e-25
								TRINITY_DN6422_c9_g1_i8	330	NC_003627.1 Maize chlorotic mottle virus genomic RNA	4437	96.512	1553	1638		Positive	7.79e-34
								TRINITY_DN935_c0_g1_i1	391	NC_003627.1 Maize chlorotic mottle virus genomic RNA	4437	95.455	369	412		Positive	1.24e-12
								TRINITY_DN11371_c0_g1_i1	257	NC_003627.1 Maize chlorotic mottle virus genomic RNA	4437	98.148	4288	4235		Negative	4.69e-20
								TRINITY_DN19527_c0_g1_i1	351	NC_003627.1 Maize chlorotic mottle virus genomic RNA	4437	93.939	1708	1643		Negative	1.41e-21
								TRINITY_DN1416_c1_g1_i1	206	NC_003627.1 Maize chlorotic mottle virus genomic RNA	4437	96.774	1908	1785		Negative	4.52e-54
								TRINITY_DN1428_c0_g2_i1	240	NC_003627.1 Maize chlorotic mottle virus genomic RNA	4437	98.4	4286	4410		Positive	6.88e-58
								TRINITY_DN1456_c0_g1_i1	316	NC_003627.1 Maize chlorotic mottle virus genomic RNA	4437	92.222	4031	4117		Positive	7.49e-29
								TRINITY_DN2128_c0_g1_i1	233	NC_003627.1 Maize chlorotic mottle virus genomic RNA	4437	100	4356	4399		Positive	3.28e-16
								TRINITY_DN7254_c0_g1_i1	255	NC_003627.1 Maize chlorotic mottle virus genomic RNA	4437	94.382	3134	3046		Negative	7.62e-33
								TRINITY_DN4884_c1_g1_i1	332	NC_003627.1 Maize chlorotic mottle virus genomic RNA	4437	90.909	2748	2856		Positive	6.06e-35
								TRINITY_DN4856_c0_g2_i1	321	NC_003627.1 Maize chlorotic mottle virus genomic RNA	4437	98.78	3350	3431		Positive	1.62e-35
								TRINITY_DN4810_c1_g1_i1	366	NC_003627.1 Maize chlorotic mottle virus genomic RNA	4437	95.652	2332	2423		Positive	5.2e-36
								TRINITY_DN4857_c0_g1_i1	219	NC_003627.1 Maize chlorotic mottle virus genomic RNA	4437	98.851	2952	3038		Positive	1.78e-38
								TRINITY_DN4871_c0_g1_i2	247	NC_003627.1 Maize chlorotic mottle virus genomic RNA	4437	94.521	954	1026		Positive	4.46e-25
								TRINITY_DN1106_c0_g1_i1	384	NC_003627.1 Maize chlorotic mottle virus genomic RNA	4437	94.253	3658	3744		Positive	5.51e-31
								TRINITY_DN3311_c0_g1_i1	262	NC_003627.1 Maize chlorotic mottle virus genomic RNA	4437	94.231	1338	1389		Positive	1.34e-15
								TRINITY_DN12873_c0_g1_i1	296	NC_003627.1 Maize chlorotic mottle virus genomic RNA	4437	95.238	1290	1207		Negative	1.16e-31
								TRINITY_DN12034_c0_g1_i1	285	NC_003627.1 Maize chlorotic mottle virus genomic RNA	4437	93.421	2778	2852		Positive	5.21e-25
								TRINITY_DN6673_c4_g1_i1	307	NC_003627.1 Maize chlorotic mottle virus genomic RNA	4437	97.222	1740	1811		Positive	2.61e-28
								TRINITY_DN6669_c3_g1_i2	230	NC_003627.1 Maize chlorotic mottle virus genomic RNA	4437	93.023	3036	2953		Negative	1.9e-28
								TRINITY_DN6669_c4_g2_i5	416	NC_003627.1 Maize chlorotic mottle virus genomic RNA	4437	98.113	1267	1372		Positive	4.54e-47
								TRINITY_DN6632_c6_g7_i1	234	NC_003627.1 Maize chlorotic mottle virus genomic RNA	4437	96.739	783	692		Negative	6.88e-38
								TRINITY_DN6671_c4_g3_i1	217	NC_003627.1 Maize chlorotic mottle virus genomic RNA	4437	95.699	3646	3737		Positive	2.95e-36
								TRINITY_DN6671_c4_g3_i4	239	NC_003627.1 Maize chlorotic mottle virus genomic RNA	4437	96.703	3646	3736		Positive	2.53e-37
								TRINITY_DN6655_c9_g5_i1	574	NC_003627.1 Maize chlorotic mottle virus genomic RNA	4437	98.02	3334	3433		Positive	1.37e-43
								TRINITY_DN6666_c0_g1_i2	340	NC_003627.1 Maize chlorotic mottle virus genomic RNA	4437	96.296	821	901		Positive	1.35e-31
								TRINITY_DN6610_c0_g2_i1	267	NC_003627.1 Maize chlorotic mottle virus genomic RNA	4437	97.059	901	800		Negative	2.2e-43
								TRINITY_DN6663_c4_g3_i2	262	NC_003627.1 Maize chlorotic mottle virus genomic RNA	4437	98.913	2648	2739		Positive	3.6e-41
								TRINITY_DN6602_c5_g5_i1	322	NC_003627.1 Maize chlorotic mottle virus genomic RNA	4437	95.181	2844	2762		Negative	4.56e-31
								TRINITY_DN6660_c4_g1_i9	221	NC_003627.1 Maize chlorotic mottle virus genomic RNA	4437	100	912	878		Negative	3.11e-11
								TRINITY_DN6615_c6_g3_i1	227	NC_003627.1 Maize chlorotic mottle virus genomic RNA	4437	95.192	2202	2305		Positive	3.08e-41
								TRINITY_DN6652_c1_g1_i1	485	NC_003627.1 Maize chlorotic mottle virus genomic RNA	4437	98.913	4204	4113		Negative	6.93e-41
								TRINITY_DN6652_c4_g2_i1	205	NC_003627.1 Maize chlorotic mottle virus genomic RNA	4437	97.826	1786	1877		Positive	1.28e-39
								TRINITY_DN6667_c4_g2_i1	260	NC_003627.1 Maize chlorotic mottle virus genomic RNA	4437	100	4178	4255		Positive	4.65e-35
								TRINITY_DN6667_c7_g1_i1	312	NC_003627.1 Maize chlorotic mottle virus genomic RNA	4437	93.421	3136	3211		Positive	1.6e-25
								TRINITY_DN6657_c4_g1_i9	395	NC_003627.1 Maize chlorotic mottle virus genomic RNA	4437	97.368	4184	4220		Positive	2.1e-10
								TRINITY_DN6657_c4_g1_i17	443	NC_003627.1 Maize chlorotic mottle virus genomic RNA	4437	100	2707	2739		Positive	8.5e-10
								TRINITY_DN6625_c7_g2_i5	244	NC_003627.1 Maize chlorotic mottle virus genomic RNA	4437	94.366	4343	4413		Positive	5.69e-24
								TRINITY_DN6665_c5_g3_i2	1158	NC_003627.1 Maize chlorotic mottle virus genomic RNA	4437	94.318	2202	2289		Positive	1.33e-31
								TRINITY_DN6603_c3_g1_i18	351	NC_003627.1 Maize chlorotic mottle virus genomic RNA	4437	98.611	3020	2949		Negative	6.48e-30
								TRINITY_DN6685_c6_g7_i1	352	NC_003627.1 Maize chlorotic mottle virus genomic RNA	4437	89.474	2779	2854		Positive	6.59e-20
								TRINITY_DN6636_c4_g1_i12	590	NC_003627.1 Maize chlorotic mottle virus genomic RNA	4437	96.512	1832	1917		Positive	3.98e-34
								TRINITY_DN6637_c3_g1_i7	213	NC_003627.1 Maize chlorotic mottle virus genomic RNA	4437	100	4397	4345		Negative	2.95e-21
								TRINITY_DN10394_c0_g1_i1	273	NC_003627.1 Maize chlorotic mottle virus genomic RNA	4437	100	2186	2156		Negative	6.57e-09
								TRINITY_DN3854_c0_g1_i1	227	NC_003627.1 Maize chlorotic mottle virus genomic RNA	4437	92.958	2348	2279		Negative	2.45e-22
								TRINITY_DN3854_c0_g1_i2	453	NC_003627.1 Maize chlorotic mottle virus genomic RNA	4437	93.243	2348	2202		Negative	1.76e-56
								TRINITY_DN8897_c0_g1_i1	244	NC_003627.1 Maize chlorotic mottle virus genomic RNA	4437	100	1774	1809		Positive	9.66e-12
								TRINITY_DN16648_c0_g1_i1	308	NC_003627.1 Maize chlorotic mottle virus genomic RNA	4437	100	1809	1776		Negative	1.61e-10
								TRINITY_DN5074_c0_g1_i2	344	NC_003627.1 Maize chlorotic mottle virus genomic RNA	4437	96.591	4227	4314		Positive	1.75e-35
								TRINITY_DN5002_c0_g1_i1	338	NC_003627.1 Maize chlorotic mottle virus genomic RNA	4437	98.333	3435	3494		Positive	2.91e-23
								TRINITY_DN5057_c0_g1_i1	425	NC_003627.1 Maize chlorotic mottle virus genomic RNA	4437	97.059	3645	3678		Positive	1.06e-08
								TRINITY_DN5045_c0_g1_i2	347	NC_003627.1 Maize chlorotic mottle virus genomic RNA	4437	91.176	3394	3294		Negative	3.82e-32
								TRINITY_DN19153_c0_g1_i1	452	NC_003627.1 Maize chlorotic mottle virus genomic RNA	4437	95.238	2677	2802		Positive	1.76e-51
								TRINITY_DN14759_c0_g1_i1	358	NC_003627.1 Maize chlorotic mottle virus genomic RNA	4437	94.545	2840	2786		Negative	4.04e-17
								TRINITY_DN2202_c0_g1_i1	583	NC_003627.1 Maize chlorotic mottle virus genomic RNA	4437	96.203	3031	2955		Negative	1.1e-29
								TRINITY_DN3754_c0_g1_i1	241	NC_003627.1 Maize chlorotic mottle virus genomic RNA	4437	95.89	1832	1904		Positive	2.59e-27
								TRINITY_DN3792_c0_g1_i1	242	NC_003627.1 Maize chlorotic mottle virus genomic RNA	4437	100	1921	1949		Positive	7.45e-08
								TRINITY_DN12728_c0_g1_i1	380	NC_003627.1 Maize chlorotic mottle virus genomic RNA	4437	93.684	4118	4024		Negative	2.52e-34
								TRINITY_DN2335_c0_g1_i2	261	NC_003627.1 Maize chlorotic mottle virus genomic RNA	4437	93.548	2460	2338		Negative	9.9e-47
								TRINITY_DN12275_c0_g1_i1	245	NC_003627.1 Maize chlorotic mottle virus genomic RNA	4437	100	3420	3380		Negative	1.61e-14
								TRINITY_DN15718_c0_g1_i1	291	NC_003627.1 Maize chlorotic mottle virus genomic RNA	4437	99.029	4400	4298		Negative	3.1e-47
								TRINITY_DN19719_c0_g1_i1	310	NC_003627.1 Maize chlorotic mottle virus genomic RNA	4437	97.03	4317	4217		Negative	9.29e-43
								TRINITY_DN5204_c1_g1_i1	298	NC_003627.1 Maize chlorotic mottle virus genomic RNA	4437	96.25	922	843		Negative	4.2e-31
								TRINITY_DN5267_c0_g1_i1	239	NC_003627.1 Maize chlorotic mottle virus genomic RNA	4437	95.588	856	923		Positive	1.55e-24
								TRINITY_DN3555_c0_g1_i1	250	NC_003627.1 Maize chlorotic mottle virus genomic RNA	4437	97.59	229	311		Positive	1.6e-34
								TRINITY_DN4033_c0_g2_i1	242	NC_003627.1 Maize chlorotic mottle virus genomic RNA	4437	100	615	571		Negative	9.51e-17
								TRINITY_DN8509_c0_g1_i1	388	NC_003627.1 Maize chlorotic mottle virus genomic RNA	4437	97.059	4347	4414		Positive	5.61e-26
								TRINITY_DN8513_c0_g1_i1	254	NC_003627.1 Maize chlorotic mottle virus genomic RNA	4437	93.182	1812	1769		Negative	3.63e-11
								TRINITY_DN1822_c0_g1_i1	222	NC_003627.1 Maize chlorotic mottle virus genomic RNA	4437	97.541	1391	1270		Negative	1.37e-54
								TRINITY_DN9341_c0_g1_i1	347	NC_003627.1 Maize chlorotic mottle virus genomic RNA	4437	100	893	920		Positive	3.96e-07
								TRINITY_DN9388_c0_g1_i1	346	NC_003627.1 Maize chlorotic mottle virus genomic RNA	4437	96.875	3214	3151		Negative	8.31e-24
								TRINITY_DN348_c0_g1_i1	397	NC_003627.1 Maize chlorotic mottle virus genomic RNA	4437	96.591	3020	2933		Negative	2.04e-35
								TRINITY_DN4535_c1_g1_i1	361	NC_003627.1 Maize chlorotic mottle virus genomic RNA	4437	93.75	1794	1888		Positive	2.38e-34
								TRINITY_DN447_c0_g1_i1	226	NC_003627.1 Maize chlorotic mottle virus genomic RNA	4437	95	334	275		Negative	4.07e-20
								TRINITY_DN447_c0_g2_i1	226	NC_003627.1 Maize chlorotic mottle virus genomic RNA	4437	98.182	329	275		Negative	1.13e-20
								TRINITY_DN466_c0_g1_i1	213	NC_003627.1 Maize chlorotic mottle virus genomic RNA	4437	97.08	2621	2485		Negative	2.79e-61
								TRINITY_DN15344_c0_g1_i1	278	NC_003627.1 Maize chlorotic mottle virus genomic RNA	4437	97.561	4195	4235		Positive	8.61e-13
								TRINITY_DN5413_c0_g1_i1	367	NC_003627.1 Maize chlorotic mottle virus genomic RNA	4437	97.619	2961	3043		Positive	2.42e-34
								TRINITY_DN5674_c1_g1_i4	341	NC_003627.1 Maize chlorotic mottle virus genomic RNA	4437	98.113	4304	4409		Positive	3.67e-47
								TRINITY_DN5666_c0_g1_i1	240	NC_003627.1 Maize chlorotic mottle virus genomic RNA	4437	96.364	1655	1709		Positive	5.63e-19
								TRINITY_DN5666_c0_g2_i1	383	NC_003627.1 Maize chlorotic mottle virus genomic RNA	4437	96.154	1655	1732		Positive	7.1e-30
								TRINITY_DN5630_c0_g1_i2	443	NC_003627.1 Maize chlorotic mottle virus genomic RNA	4437	95.575	1673	1561		Negative	6.25e-46
								TRINITY_DN11742_c0_g1_i1	343	NC_003627.1 Maize chlorotic mottle virus genomic RNA	4437	100	949	1020		Positive	1.36e-31
								TRINITY_DN4124_c0_g2_i1	402	NC_003627.1 Maize chlorotic mottle virus genomic RNA	4437	96.296	898	818		Negative	1.61e-31
								TRINITY_DN4201_c0_g1_i1	207	NC_003627.1 Maize chlorotic mottle virus genomic RNA	4437	97.727	4222	4179		Negative	1.34e-14
								TRINITY_DN4151_c0_g1_i3	292	NC_003627.1 Maize chlorotic mottle virus genomic RNA	4437	95.714	957	888		Negative	1.49e-25
								TRINITY_DN6517_c6_g2_i1	215	NC_003627.1 Maize chlorotic mottle virus genomic RNA	4437	96.429	702	785		Positive	1.75e-33
								TRINITY_DN6519_c6_g4_i1	304	NC_003627.1 Maize chlorotic mottle virus genomic RNA	4437	98	4210	4161		Negative	9.42e-18
								TRINITY_DN6544_c7_g1_i9	445	NC_003627.1 Maize chlorotic mottle virus genomic RNA	4437	93.458	3447	3342		Negative	1.06e-38
								TRINITY_DN6577_c4_g3_i4	231	NC_003627.1 Maize chlorotic mottle virus genomic RNA	4437	96.226	4232	4182		Negative	2.51e-17
								TRINITY_DN6585_c3_g4_i12	604	NC_003627.1 Maize chlorotic mottle virus genomic RNA	4437	96.639	1693	1811		Positive	8.59e-51
								TRINITY_DN6545_c6_g2_i4	805	NC_003627.1 Maize chlorotic mottle virus genomic RNA	4437	93.939	818	915		Positive	1.18e-35
								TRINITY_DN6572_c0_g1_i1	245	NC_003627.1 Maize chlorotic mottle virus genomic RNA	4437	99.107	634	523		Negative	2.55e-52
								TRINITY_DN6552_c3_g1_i12	405	NC_003627.1 Maize chlorotic mottle virus genomic RNA	4437	100	3469	3433		Negative	4.63e-12
								TRINITY_DN6549_c8_g5_i1	644	NC_003627.1 Maize chlorotic mottle virus genomic RNA	4437	98	1027	978		Negative	2.07e-17
								TRINITY_DN6523_c8_g5_i1	284	NC_003627.1 Maize chlorotic mottle virus genomic RNA	4437	94.828	3137	3080		Negative	6.77e-19
								TRINITY_DN6510_c4_g1_i1	277	NC_003627.1 Maize chlorotic mottle virus genomic RNA	4437	96.154	1544	1673		Positive	1.35e-55
								TRINITY_DN6579_c4_g1_i1	211	NC_003627.1 Maize chlorotic mottle virus genomic RNA	4437	96.154	2555	2632		Positive	3.72e-30
								TRINITY_DN6579_c4_g2_i1	233	NC_003627.1 Maize chlorotic mottle virus genomic RNA	4437	94.118	2612	2696		Positive	1.15e-30
								TRINITY_DN6579_c4_g3_i1	239	NC_003627.1 Maize chlorotic mottle virus genomic RNA	4437	95.364	2630	2780		Positive	5.26e-64
								TRINITY_DN6579_c4_g1_i2	220	NC_003627.1 Maize chlorotic mottle virus genomic RNA	4437	93.443	2555	2676		Positive	2.95e-46
								TRINITY_DN6348_c2_g1_i15	254	NC_003627.1 Maize chlorotic mottle virus genomic RNA	4437	100	3066	3005		Negative	3.55e-26
								TRINITY_DN6357_c7_g4_i5	368	NC_003627.1 Maize chlorotic mottle virus genomic RNA	4437	97.059	145	212		Positive	5.3e-26
								TRINITY_DN6327_c11_g1_i2	516	NC_003627.1 Maize chlorotic mottle virus genomic RNA	4437	93.458	3112	3218		Positive	1.24e-38
								TRINITY_DN6338_c1_g4_i1	243	NC_003627.1 Maize chlorotic mottle virus genomic RNA	4437	97.315	1025	879		Negative	2.47e-67
								TRINITY_DN6338_c1_g4_i2	279	NC_003627.1 Maize chlorotic mottle virus genomic RNA	4437	100	1029	879		Negative	1.32e-75
								TRINITY_DN6338_c1_g4_i3	284	NC_003627.1 Maize chlorotic mottle virus genomic RNA	4437	98.374	1001	879		Negative	1.07e-56
								TRINITY_DN6338_c3_g1_i1	222	NC_003627.1 Maize chlorotic mottle virus genomic RNA	4437	93.204	3747	3646		Negative	8.4e-37
								TRINITY_DN6306_c2_g1_i10	254	NC_003627.1 Maize chlorotic mottle virus genomic RNA	4437	95	574	517		Negative	1.67e-19
								TRINITY_DN6361_c4_g1_i8	288	NC_003627.1 Maize chlorotic mottle virus genomic RNA	4437	97.778	4146	4235		Positive	8.64e-38
								TRINITY_DN6401_c9_g1_i2	280	NC_003627.1 Maize chlorotic mottle virus genomic RNA	4437	96.552	856	913		Positive	1.43e-20
								TRINITY_DN6381_c0_g10_i1	351	NC_003627.1 Maize chlorotic mottle virus genomic RNA	4437	98.765	3343	3423		Positive	6.43e-35
								TRINITY_DN6396_c0_g1_i1	208	NC_003627.1 Maize chlorotic mottle virus genomic RNA	4437	93.458	2185	2291		Positive	1.3e-39
								TRINITY_DN6396_c0_g1_i2	257	NC_003627.1 Maize chlorotic mottle virus genomic RNA	4437	92.92	2185	2296		Positive	1.27e-40
								TRINITY_DN6396_c7_g1_i1	264	NC_003627.1 Maize chlorotic mottle virus genomic RNA	4437	94.937	2145	2223		Positive	2.22e-28
								TRINITY_DN6330_c7_g3_i1	854	NC_003627.1 Maize chlorotic mottle virus genomic RNA	4437	96.97	1713	1811		Positive	3.47e-41
								TRINITY_DN298_c0_g1_i1	232	NC_003627.1 Maize chlorotic mottle virus genomic RNA	4437	100	4195	4230		Positive	9.14e-12
								TRINITY_DN237_c0_g2_i1	316	NC_003627.1 Maize chlorotic mottle virus genomic RNA	4437	96.364	3430	3376		Negative	7.59e-19
								TRINITY_DN9677_c0_g1_i1	331	NC_003627.1 Maize chlorotic mottle virus genomic RNA	4437	96.33	2934	3042		Positive	1.66e-45
								TRINITY_DN9669_c0_g1_i1	229	NC_003627.1 Maize chlorotic mottle virus genomic RNA	4437	90.909	3471	3418		Negative	1.94e-13
								TRINITY_DN9684_c0_g1_i1	224	NC_003627.1 Maize chlorotic mottle virus genomic RNA	4437	88.889	4358	4419		Positive	5.25e-14
								TRINITY_DN7047_c0_g1_i1	401	NC_003627.1 Maize chlorotic mottle virus genomic RNA	4437	93.137	2698	2798		Positive	2.06e-35
								TRINITY_DN20253_c0_g1_i1	363	NC_003627.1 Maize chlorotic mottle virus genomic RNA	4437	98.485	3532	3467		Negative	1.45e-26
								TRINITY_DN20209_c0_g1_i1	274	NC_003627.1 Maize chlorotic mottle virus genomic RNA	4437	97.778	1810	1766		Negative	5.07e-15
								TRINITY_DN11159_c0_g1_i1	270	NC_003627.1 Maize chlorotic mottle virus genomic RNA	4437	95.652	912	844		Negative	4.92e-25
								TRINITY_DN17138_c0_g1_i1	274	NC_003627.1 Maize chlorotic mottle virus genomic RNA	4437	93.056	2856	2786		Negative	8.36e-23
								TRINITY_DN1006_c0_g1_i1	406	NC_003627.1 Maize chlorotic mottle virus genomic RNA	4437	98.113	180	232		Positive	2.76e-19
								TRINITY_DN1254_c0_g1_i1	219	NC_003627.1 Maize chlorotic mottle virus genomic RNA	4437	97.826	2768	2813		Positive	1.1e-15
								TRINITY_DN1231_c0_g2_i1	321	NC_003627.1 Maize chlorotic mottle virus genomic RNA	4437	96.341	4336	4416		Positive	1.26e-31
								TRINITY_DN1216_c0_g2_i1	401	NC_003627.1 Maize chlorotic mottle virus genomic RNA	4437	94.366	4175	4245		Positive	9.72e-24
								TRINITY_DN6106_c14_g1_i1	241	NC_003627.1 Maize chlorotic mottle virus genomic RNA	4437	97.826	265	310		Positive	1.22e-15
								TRINITY_DN6107_c6_g3_i2	304	NC_003627.1 Maize chlorotic mottle virus genomic RNA	4437	95.181	2274	2192		Negative	4.29e-31
								TRINITY_DN6154_c3_g1_i5	333	NC_003627.1 Maize chlorotic mottle virus genomic RNA	4437	96.063	1550	1676		Positive	7.64e-54
								TRINITY_DN6108_c7_g2_i1	269	NC_003627.1 Maize chlorotic mottle virus genomic RNA	4437	96.364	4175	4229		Positive	6.38e-19
								TRINITY_DN6179_c3_g3_i6	623	NC_003627.1 Maize chlorotic mottle virus genomic RNA	4437	96.552	969	1026		Positive	3.33e-20
								TRINITY_DN6186_c66_g1_i1	4455	NC_003627.1 Maize chlorotic mottle virus genomic RNA	4437	96.729	4415	14		Negative	0
								TRINITY_DN6186_c66_g1_i2	879	NC_003627.1 Maize chlorotic mottle virus genomic RNA	4437	96.513	3062	2346		Negative	0
								TRINITY_DN6186_c66_g1_i3	1387	NC_003627.1 Maize chlorotic mottle virus genomic RNA	4437	96.817	3633	2346		Negative	0
								TRINITY_DN6186_c66_g1_i4	2970	NC_003627.1 Maize chlorotic mottle virus genomic RNA	4437	96.495	2866	14		Negative	0
								TRINITY_DN6159_c5_g8_i1	251	NC_003627.1 Maize chlorotic mottle virus genomic RNA	4437	98.936	4214	4121		Negative	2.66e-42
								TRINITY_DN6105_c2_g1_i2	286	NC_003627.1 Maize chlorotic mottle virus genomic RNA	4437	97.778	908	864		Negative	5.31e-15
								TRINITY_DN6155_c5_g1_i1	314	NC_003627.1 Maize chlorotic mottle virus genomic RNA	4437	91.304	2895	2986		Positive	7.43e-29
								TRINITY_DN6104_c1_g3_i1	364	NC_003627.1 Maize chlorotic mottle virus genomic RNA	4437	95.041	2213	2332		Positive	3.04e-48
								TRINITY_DN6189_c3_g2_i1	212	NC_003627.1 Maize chlorotic mottle virus genomic RNA	4437	91.057	3608	3728		Positive	2.85e-41
								TRINITY_DN6117_c10_g4_i1	347	NC_003627.1 Maize chlorotic mottle virus genomic RNA	4437	100	566	630		Positive	1.07e-27
								TRINITY_DN6129_c0_g1_i1	246	NC_003627.1 Maize chlorotic mottle virus genomic RNA	4437	95.455	2685	2794		Positive	1.55e-44
								TRINITY_DN6124_c5_g1_i14	555	NC_003627.1 Maize chlorotic mottle virus genomic RNA	4437	96.825	3599	3537		Negative	4.9e-23
								TRINITY_DN6158_c12_g1_i1	263	NC_003627.1 Maize chlorotic mottle virus genomic RNA	4437	100	4182	4249		Positive	1.71e-29
								TRINITY_DN6152_c6_g2_i8	244	NC_003627.1 Maize chlorotic mottle virus genomic RNA	4437	96.97	2962	3027		Positive	1.58e-24
								TRINITY_DN6119_c9_g1_i1	216	NC_003627.1 Maize chlorotic mottle virus genomic RNA	4437	100	639	588		Negative	1.08e-20
								TRINITY_DN6140_c4_g1_i1	223	NC_003627.1 Maize chlorotic mottle virus genomic RNA	4437	100	2255	2226		Negative	1.89e-08
								TRINITY_DN6145_c0_g1_i1	337	NC_003627.1 Maize chlorotic mottle virus genomic RNA	4437	96.842	4314	4408		Positive	7.91e-39
								TRINITY_DN10495_c0_g1_i2	252	NC_003627.1 Maize chlorotic mottle virus genomic RNA	4437	95.789	2340	2434		Positive	7.47e-38
								TRINITY_DN17703_c0_g1_i1	203	NC_003627.1 Maize chlorotic mottle virus genomic RNA	4437	97.938	2156	2252		Positive	2.1e-42
								TRINITY_DN5388_c0_g1_i2	357	NC_003627.1 Maize chlorotic mottle virus genomic RNA	4437	96.97	1342	1407		Positive	6.64e-25
								TRINITY_DN5312_c1_g1_i1	278	NC_003627.1 Maize chlorotic mottle virus genomic RNA	4437	89.831	2212	2325		Positive	3.87e-36
								TRINITY_DN16064_c0_g1_i1	364	NC_003627.1 Maize chlorotic mottle virus genomic RNA	4437	91.463	1915	1835		Negative	6.78e-25
								TRINITY_DN4293_c0_g1_i2	358	NC_003627.1 Maize chlorotic mottle virus genomic RNA	4437	95.556	2156	2290		Positive	1.37e-56
								TRINITY_DN5890_c2_g2_i1	214	NC_003627.1 Maize chlorotic mottle virus genomic RNA	4437	91.837	1352	1304		Negative	8.36e-12
								TRINITY_DN10883_c0_g1_i1	285	NC_003627.1 Maize chlorotic mottle virus genomic RNA	4437	93.182	562	519		Negative	4.12e-11
								TRINITY_DN10276_c0_g1_i1	330	NC_003627.1 Maize chlorotic mottle virus genomic RNA	4437	98.824	2953	3037		Positive	3.6e-37
								TRINITY_DN18267_c0_g1_i2	277	NC_003627.1 Maize chlorotic mottle virus genomic RNA	4437	96.694	3282	3402		Positive	1.05e-51
								TRINITY_DN6717_c3_g1_i1	330	NC_003627.1 Maize chlorotic mottle virus genomic RNA	4437	92.308	2287	2223		Negative	2.21e-19
								TRINITY_DN6706_c10_g1_i1	201	NC_003627.1 Maize chlorotic mottle virus genomic RNA	4437	94.949	2702	2800		Positive	1.62e-38
								TRINITY_DN6716_c5_g2_i1	498	NC_003627.1 Maize chlorotic mottle virus genomic RNA	4437	91.837	1372	1275		Negative	5.59e-32
								TRINITY_DN6729_c32_g2_i4	205	NC_003627.1 Maize chlorotic mottle virus genomic RNA	4437	98.214	1301	1356		Positive	2.82e-21
								TRINITY_DN6714_c2_g1_i1	252	NC_003627.1 Maize chlorotic mottle virus genomic RNA	4437	97.802	1985	1895		Negative	5.77e-39
								TRINITY_DN6702_c2_g5_i2	236	NC_003627.1 Maize chlorotic mottle virus genomic RNA	4437	95.918	2980	3028		Positive	4.3e-15
								TRINITY_DN6747_c0_g1_i1	256	NC_003627.1 Maize chlorotic mottle virus genomic RNA	4437	100	644	582		Negative	9.97e-27
								TRINITY_DN6725_c9_g4_i4	206	NC_003627.1 Maize chlorotic mottle virus genomic RNA	4437	94.545	1295	1349		Positive	2.21e-17
								TRINITY_DN6727_c8_g3_i10	202	NC_003627.1 Maize chlorotic mottle virus genomic RNA	4437	94.937	2363	2285		Negative	4.58e-29
								TRINITY_DN4936_c0_g1_i2	581	NC_003627.1 Maize chlorotic mottle virus genomic RNA	4437	100	3366	3430		Positive	1.84e-27
								TRINITY_DN10773_c0_g1_i1	237	NC_003627.1 Maize chlorotic mottle virus genomic RNA	4437	97.727	4415	4372		Negative	1.55e-14
								TRINITY_DN18013_c0_g1_i1	255	NC_003627.1 Maize chlorotic mottle virus genomic RNA	4437	94.697	4282	4413		Positive	2.06e-53
								TRINITY_DN14945_c0_g1_i1	304	NC_003627.1 Maize chlorotic mottle virus genomic RNA	4437	95.726	1674	1558		Negative	2.51e-48
								TRINITY_DN10081_c0_g1_i1	282	NC_003627.1 Maize chlorotic mottle virus genomic RNA	4437	98	1811	1762		Negative	8.68e-18
								TRINITY_DN17601_c0_g1_i1	208	NC_003627.1 Maize chlorotic mottle virus genomic RNA	4437	100	3037	3010		Negative	2.27e-07
								TRINITY_DN17574_c0_g1_i1	305	NC_003627.1 Maize chlorotic mottle virus genomic RNA	4437	95.918	1646	1549		Negative	1.98e-39
								TRINITY_DN1741_c0_g1_i1	266	NC_003627.1 Maize chlorotic mottle virus genomic RNA	4437	97.561	3871	3790		Negative	6.17e-34
								TRINITY_DN1720_c0_g1_i1	207	NC_003627.1 Maize chlorotic mottle virus genomic RNA	4437	97.5	1828	1947		Positive	1.64e-53
								TRINITY_DN5729_c2_g1_i1	230	NC_003627.1 Maize chlorotic mottle virus genomic RNA	4437	95.146	3748	3646		Negative	1.12e-40
								TRINITY_DN662_c0_g1_i2	234	NC_003627.1 Maize chlorotic mottle virus genomic RNA	4437	95.652	4302	4416		Positive	3.16e-46
								TRINITY_DN670_c1_g1_i1	219	NC_003627.1 Maize chlorotic mottle virus genomic RNA	4437	96.899	910	1035		Positive	1.04e-55
								TRINITY_DN165_c0_g1_i1	262	NC_003627.1 Maize chlorotic mottle virus genomic RNA	4437	91.358	3150	3230		Positive	1.71e-24
								TRINITY_DN9513_c0_g1_i1	225	NC_003627.1 Maize chlorotic mottle virus genomic RNA	4437	100	575	617		Positive	1.13e-15
								TRINITY_DN8450_c0_g1_i1	288	NC_003627.1 Maize chlorotic mottle virus genomic RNA	4437	95.238	607	648		Positive	4.16e-11
								TRINITY_DN19381_c0_g1_i1	252	NC_003627.1 Maize chlorotic mottle virus genomic RNA	4437	97.222	1921	1956		Positive	4.66e-10
								TRINITY_DN96_c0_g1_i1	289	NC_003627.1 Maize chlorotic mottle virus genomic RNA	4437	91.803	4175	4235		Positive	3.21e-17
								TRINITY_DN8997_c0_g1_i1	267	NC_003627.1 Maize chlorotic mottle virus genomic RNA	4437	93.204	3425	3323		Negative	1.03e-36
								TRINITY_DN15933_c0_g1_i1	226	NC_003627.1 Maize chlorotic mottle virus genomic RNA	4437	97.479	811	929		Positive	6.49e-53
								TRINITY_DN6075_c6_g3_i2	262	NC_003627.1 Maize chlorotic mottle virus genomic RNA	4437	93.617	923	878		Negative	2.9e-12
								TRINITY_DN6010_c5_g5_i2	271	NC_003627.1 Maize chlorotic mottle virus genomic RNA	4437	100	1807	1773		Negative	3.9e-11
								TRINITY_DN6039_c0_g4_i3	246	NC_003627.1 Maize chlorotic mottle virus genomic RNA	4437	98.592	4161	4231		Positive	1.59e-29
								TRINITY_DN6005_c6_g1_i1	246	NC_003627.1 Maize chlorotic mottle virus genomic RNA	4437	98.438	721	784		Positive	1.23e-25
								TRINITY_DN6089_c15_g3_i1	207	NC_003627.1 Maize chlorotic mottle virus genomic RNA	4437	97.468	784	706		Negative	2.18e-32
								TRINITY_DN6074_c8_g5_i4	273	NC_003627.1 Maize chlorotic mottle virus genomic RNA	4437	95.726	1558	1674		Positive	2.23e-48
								TRINITY_DN6074_c8_g4_i2	525	NC_003627.1 Maize chlorotic mottle virus genomic RNA	4437	96.899	2795	2667		Negative	2.05e-56
								TRINITY_DN20172_c0_g1_i1	261	NC_003627.1 Maize chlorotic mottle virus genomic RNA	4437	98.148	1754	1807		Positive	4.77e-20
								TRINITY_DN20160_c0_g1_i1	300	NC_003627.1 Maize chlorotic mottle virus genomic RNA	4437	91.667	856	925		Positive	1.54e-20
								TRINITY_DN4750_c0_g1_i1	402	NC_003627.1 Maize chlorotic mottle virus genomic RNA	4437	98.276	294	237		Negative	4.53e-22
								TRINITY_DN3148_c0_g2_i1	366	NC_003627.1 Maize chlorotic mottle virus genomic RNA	4437	97.297	4374	4410		Positive	1.94e-10
								TRINITY_DN2675_c0_g1_i1	232	NC_003627.1 Maize chlorotic mottle virus genomic RNA	4437	97.101	1643	1711		Positive	8.95e-27
								TRINITY_DN2668_c0_g1_i1	424	NC_003627.1 Maize chlorotic mottle virus genomic RNA	4437	98.529	743	810		Positive	1.32e-27
								TRINITY_DN3204_c0_g1_i1	266	NC_003627.1 Maize chlorotic mottle virus genomic RNA	4437	98.214	4397	4286		Negative	1.3e-50
								TRINITY_DN3243_c0_g1_i1	275	NC_003627.1 Maize chlorotic mottle virus genomic RNA	4437	97.98	3332	3430		Positive	2.27e-43
								TRINITY_DN3300_c0_g1_i1	205	NC_003627.1 Maize chlorotic mottle virus genomic RNA	4437	97.872	3324	3417		Positive	9.87e-41
								TRINITY_DN9760_c0_g1_i1	275	NC_003627.1 Maize chlorotic mottle virus genomic RNA	4437	95.714	853	921		Positive	5.01e-25
								TRINITY_DN9723_c0_g1_i1	279	NC_003627.1 Maize chlorotic mottle virus genomic RNA	4437	98.276	2981	3038		Positive	3.07e-22
								TRINITY_DN9714_c0_g1_i1	245	NC_003627.1 Maize chlorotic mottle virus genomic RNA	4437	89.873	2336	2258		Negative	9.57e-22
								TRINITY_DN18835_c0_g1_i2	291	NC_003627.1 Maize chlorotic mottle virus genomic RNA	4437	100	4315	4402		Positive	1.45e-40
								TRINITY_DN1968_c0_g1_i1	216	NC_003627.1 Maize chlorotic mottle virus genomic RNA	4437	95.506	1482	1394		Negative	1.36e-34
								TRINITY_DN15551_c0_g1_i1	217	NC_003627.1 Maize chlorotic mottle virus genomic RNA	4437	92.157	3430	3380		Negative	1.82e-13
								TRINITY_DN17209_c0_g1_i1	241	NC_003627.1 Maize chlorotic mottle virus genomic RNA	4437	100	1029	980		Negative	1.57e-19
								TRINITY_DN17011_c0_g1_i1	217	NC_003627.1 Maize chlorotic mottle virus genomic RNA	4437	95.556	2610	2522		Negative	1.37e-34
								TRINITY_DN14900_c0_g1_i1	230	NC_003627.1 Maize chlorotic mottle virus genomic RNA	4437	100	912	879		Negative	1.17e-10
								TRINITY_DN6251_c2_g2_i1	225	NC_003627.1 Maize chlorotic mottle virus genomic RNA	4437	94.737	3147	3203		Positive	1.89e-18
								TRINITY_DN6251_c4_g1_i21	211	NC_003627.1 Maize chlorotic mottle virus genomic RNA	4437	97.826	829	874		Positive	1.06e-15
								TRINITY_DN6207_c10_g2_i2	283	NC_003627.1 Maize chlorotic mottle virus genomic RNA	4437	87.5	4238	4184		Negative	1.47e-10
								TRINITY_DN6203_c13_g1_i2	314	NC_003627.1 Maize chlorotic mottle virus genomic RNA	4437	95.312	4338	4275		Negative	3.48e-22
								TRINITY_DN6290_c2_g1_i15	234	NC_003627.1 Maize chlorotic mottle virus genomic RNA	4437	95.833	824	919		Positive	6.88e-38
								TRINITY_DN6250_c3_g1_i13	203	NC_003627.1 Maize chlorotic mottle virus genomic RNA	4437	98	1915	1964		Positive	6.05e-18
								TRINITY_DN6230_c9_g3_i2	340	NC_003627.1 Maize chlorotic mottle virus genomic RNA	4437	96.721	4163	4223		Positive	1.36e-21
								TRINITY_DN6230_c10_g1_i4	304	NC_003627.1 Maize chlorotic mottle virus genomic RNA	4437	94.937	844	922		Positive	7.18e-29
								TRINITY_DN6211_c2_g2_i1	289	NC_003627.1 Maize chlorotic mottle virus genomic RNA	4437	96.825	2555	2617		Positive	2.46e-23
								TRINITY_DN6240_c3_g1_i1	228	NC_003627.1 Maize chlorotic mottle virus genomic RNA	4437	97.414	2462	2347		Negative	3.05e-51
								TRINITY_DN6260_c2_g1_i2	269	NC_003627.1 Maize chlorotic mottle virus genomic RNA	4437	96.97	3434	3370		Negative	1.76e-24
								TRINITY_DN6257_c5_g2_i3	229	NC_003627.1 Maize chlorotic mottle virus genomic RNA	4437	98.182	867	921		Positive	1.15e-20
								TRINITY_DN6283_c11_g1_i1	216	NC_003627.1 Maize chlorotic mottle virus genomic RNA	4437	96.875	4111	4016		Negative	3.76e-40
								TRINITY_DN6268_c7_g8_i1	297	NC_003627.1 Maize chlorotic mottle virus genomic RNA	4437	96.429	4049	4104		Positive	1.97e-19
								TRINITY_DN6271_c4_g1_i4	576	NC_003627.1 Maize chlorotic mottle virus genomic RNA	4437	97.183	4262	4403		Positive	1.34e-63
								TRINITY_DN6216_c2_g1_i7	302	NC_003627.1 Maize chlorotic mottle virus genomic RNA	4437	97.826	3430	3385		Negative	1.57e-15
								TRINITY_DN7883_c0_g1_i1	247	NC_003627.1 Maize chlorotic mottle virus genomic RNA	4437	95.946	3660	3733		Positive	7.41e-28
								TRINITY_DN7875_c0_g1_i1	301	NC_003627.1 Maize chlorotic mottle virus genomic RNA	4437	95.238	2303	2220		Negative	1.18e-31
								TRINITY_DN15134_c0_g1_i1	237	NC_003627.1 Maize chlorotic mottle virus genomic RNA	4437	100	2416	2459		Positive	3.34e-16
								TRINITY_DN15128_c0_g1_i1	253	NC_003627.1 Maize chlorotic mottle virus genomic RNA	4437	92.391	3809	3719		Negative	1.26e-30
								TRINITY_DN3967_c0_g2_i1	206	NC_003627.1 Maize chlorotic mottle virus genomic RNA	4437	100	246	207		Negative	4.79e-14
								TRINITY_DN3937_c0_g1_i1	217	NC_003627.1 Maize chlorotic mottle virus genomic RNA	4437	94.828	147	90		Negative	5.04e-19
								TRINITY_DN713_c0_g1_i1	401	NC_003627.1 Maize chlorotic mottle virus genomic RNA	4437	94	1737	1639		Negative	1.59e-36
								TRINITY_DN788_c0_g1_i1	293	NC_003627.1 Maize chlorotic mottle virus genomic RNA	4437	95.604	2961	3048		Positive	1.9e-34
								TRINITY_DN12614_c0_g1_i1	242	NC_003627.1 Maize chlorotic mottle virus genomic RNA	4437	100	4351	4408		Positive	5.64e-24
								Maize chlorotic mottle virus										Sugarcane mosaic virus									Maize streak virus									Maize dwarf mosaic virus									Hubei Poty-like virus 1 strain SCM51506 polyprotein gene
Researcher	Sample	Host	Total	Total	Unique_Contigs	Total	Contigs	Conting	Conting	Reference	Reference	%	Coordinates			Polarity	E	Conting	Conting	Reference	Reference	%	Coordinates		Polarity	E	Conting	Conting	Reference	Reference	%	Coordinates		Polarity	E	Conting	Conting	Reference	Reference	%	Coordinates		Polarity	E	Conting	Conting	Reference	Reference	%
		Maize Leaf	Sequences	Contigs	matching to Virus	virus	Unmatch_to _PVGDB/NCBI		Length		Length	identity	Start	End			value		Length		Length	identity	Start	End		value		Length		Length	identity	Start	End		value		Length		Length	identity	Start	End		value		Length		Length	identity
DNS	24		921952	76211	ßß	5	23270	TRINITY_DN15663_c1_g1_i1	313	NC_003627.1 Maize chlorotic mottle virus genomic RNA	4437	89.655	2971	3055		Positive	7.46e-24	TRINITY_DN7625_c0_g1_i1	2857	NC_003398.1 Sugarcane mosaic virus	9596	81.481	5453	2600	Negative	0	TRINITY_DN27093_c0_g1_i1	2082	NC_001346.2 Maize streak virus - A[Ama]	2689	98.546	1	1719	Positive	0	TRINITY_DN7058_c0_g1_i1	566	NC_003377.1 Maize dwarf mosaic virus	9515	76.302	716	1091	Positive	1.34e-48	TRINITY_DN7443_c2_g3_i3	2646	NC_032912.1 Hubei Poty-like virus 1 strain SCM51506 polyprotein gene	9356	76.613
DNS	24							TRINITY_DN5919_c0_g1_i1	341	NC_003627.1 Maize chlorotic mottle virus genomic RNA	4437	96.396	1550	1660		Positive	1.32e-46	TRINITY_DN7625_c0_g1_i2	210	NC_003398.1 Sugarcane mosaic virus	9596	89.524	2809	2600	Negative	7.52e-72	TRINITY_DN27093_c0_g1_i1	2082	NC_001346.2 Maize streak virus - A[Ama]	2689	97.324	2391	2689	Positive	1.24e-143	TRINITY_DN7058_c0_g1_i4	646	NC_003377.1 Maize dwarf mosaic virus	9515	76.053	720	1091	Positive	2.58e-46
DNS	24							TRINITY_DN5548_c0_g2_i1	228	NC_003627.1 Maize chlorotic mottle virus genomic RNA	4437	97.368	3024	2949		Negative	1.13e-30	TRINITY_DN7625_c0_g1_i3	2576	NC_003398.1 Sugarcane mosaic virus	9596	81.531	4969	2600	Negative	0										TRINITY_DN7443_c2_g2_i1	1205	NC_003377.1 Maize dwarf mosaic virus	9515	81.081	9212	8585	Negative	1.19e-141
DNS	24							TRINITY_DN13064_c0_g1_i1	287	NC_003627.1 Maize chlorotic mottle virus genomic RNA	4437	97	4311	4410		Positive	1.11e-41	TRINITY_DN7625_c1_g1_i1	720	NC_003398.1 Sugarcane mosaic virus	9596	89.722	873	1592	Positive	0										TRINITY_DN7443_c2_g2_i2	537	NC_003377.1 Maize dwarf mosaic virus	9515	82.041	9212	8723	Negative	5.36e-117
DNS	24							TRINITY_DN41771_c0_g1_i1	388	NC_003627.1 Maize chlorotic mottle virus genomic RNA	4437	100	1809	1777		Negative	7.41e-10	TRINITY_DN7097_c0_g1_i1	463	NC_003398.1 Sugarcane mosaic virus	9596	81.345	3662	3204	Negative	3.62e-103										TRINITY_DN7867_c7_g2_i1	1231	NC_003377.1 Maize dwarf mosaic virus	9515	74.153	724	1275	Positive	4.93e-56
DNS	24							TRINITY_DN6498_c1_g1_i1	318	NC_003627.1 Maize chlorotic mottle virus genomic RNA	4437	97.794	4202	4067		Negative	3.34e-62	TRINITY_DN7092_c0_g1_i1	562	NC_003398.1 Sugarcane mosaic virus	9596	79.189	2836	3396	Positive	2.05e-106
DNS	24							TRINITY_DN6412_c0_g1_i1	528	NC_003627.1 Maize chlorotic mottle virus genomic RNA	4437	97.368	1774	1924		Positive	1.21e-68	TRINITY_DN7092_c0_g1_i2	271	NC_003398.1 Sugarcane mosaic virus	9596	83.333	2836	3106	Positive	1.3e-65
DNS	24							TRINITY_DN6412_c0_g1_i2	215	NC_003627.1 Maize chlorotic mottle virus genomic RNA	4437	97.087	1774	1876		Positive	4.81e-44	TRINITY_DN7443_c2_g2_i1	1205	NC_003398.1 Sugarcane mosaic virus	9596	89.823	9288	8611	Negative	0
								TRINITY_DN13773_c0_g1_i1	236	NC_003627.1 Maize chlorotic mottle virus genomic RNA	4437	97.619	376	417		Positive	2e-13	TRINITY_DN7443_c2_g2_i2	537	NC_003398.1 Sugarcane mosaic virus	9596	93.145	9288	8793	Negative	0
								TRINITY_DN16238_c0_g1_i1	221	NC_003627.1 Maize chlorotic mottle virus genomic RNA	4437	97.826	924	879		Negative	1.11e-15	TRINITY_DN1792_c0_g1_i1	283	NC_003398.1 Sugarcane mosaic virus	9596	90.813	5480	5198	Negative	1.28e-105
								TRINITY_DN33190_c0_g1_i1	251	NC_003627.1 Maize chlorotic mottle virus genomic RNA	4437	96.97	3326	3391		Positive	4.54e-25	TRINITY_DN7867_c6_g2_i1	2278	NC_003398.1 Sugarcane mosaic virus	9596	88.192	8594	9546	Positive	0
								TRINITY_DN31412_c0_g1_i1	250	NC_003627.1 Maize chlorotic mottle virus genomic RNA	4437	98.361	4355	4415		Positive	5.85e-24	TRINITY_DN7867_c6_g2_i3	257	NC_003398.1 Sugarcane mosaic virus	9596	85.816	9270	9546	Positive	2.02e-73
								TRINITY_DN1483_c0_g1_i1	392	NC_003627.1 Maize chlorotic mottle virus genomic RNA	4437	95	2776	2855		Positive	2.62e-29	TRINITY_DN7867_c7_g1_i1	5070	NC_003398.1 Sugarcane mosaic virus	9596	79.709	1644	6511	Positive	0
								TRINITY_DN4328_c0_g2_i1	261	NC_003627.1 Maize chlorotic mottle virus genomic RNA	4437	94.444	4180	4233		Positive	1.03e-16	TRINITY_DN7867_c7_g1_i4	5727	NC_003398.1 Sugarcane mosaic virus	9596	79.749	1644	7369	Positive	0
								TRINITY_DN7255_c10_g3_i1	253	NC_003627.1 Maize chlorotic mottle virus genomic RNA	4437	95.161	981	1042		Positive	3.56e-21
								TRINITY_DN7247_c2_g5_i1	220	NC_003627.1 Maize chlorotic mottle virus genomic RNA	4437	96.429	2799	2688		Negative	2.28e-47
								TRINITY_DN7269_c4_g15_i1	206	NC_003627.1 Maize chlorotic mottle virus genomic RNA	4437	100	206	245		Positive	4.79e-14
								TRINITY_DN7264_c7_g2_i4	222	NC_003627.1 Maize chlorotic mottle virus genomic RNA	4437	96.809	1548	1641		Positive	5.02e-39
								TRINITY_DN4872_c0_g1_i1	265	NC_003627.1 Maize chlorotic mottle virus genomic RNA	4437	100	3378	3429		Positive	1.35e-20
								TRINITY_DN3318_c0_g1_i1	708	NC_003627.1 Maize chlorotic mottle virus genomic RNA	4437	98.039	2698	2648		Negative	6.36e-18
								TRINITY_DN3318_c0_g2_i1	431	NC_003627.1 Maize chlorotic mottle virus genomic RNA	4437	98.936	2741	2648		Negative	4.74e-42
								TRINITY_DN45875_c0_g1_i1	269	NC_003627.1 Maize chlorotic mottle virus genomic RNA	4437	96.154	1813	1762		Negative	2.97e-17
								TRINITY_DN45836_c0_g1_i1	218	NC_003627.1 Maize chlorotic mottle virus genomic RNA	4437	97.727	921	878		Negative	1.42e-14
								TRINITY_DN38095_c0_g1_i1	258	NC_003627.1 Maize chlorotic mottle virus genomic RNA	4437	98.039	1810	1760		Negative	2.19e-18
								TRINITY_DN7699_c4_g1_i11	360	NC_003627.1 Maize chlorotic mottle virus genomic RNA	4437	100	784	743		Negative	6.79e-15
								TRINITY_DN7650_c8_g1_i1	351	NC_003627.1 Maize chlorotic mottle virus genomic RNA	4437	92.063	4180	4242		Positive	1.1e-17
								TRINITY_DN7689_c1_g3_i2	274	NC_003627.1 Maize chlorotic mottle virus genomic RNA	4437	100	3021	2990		Negative	1.84e-09
								TRINITY_DN7644_c4_g1_i10	422	NC_003627.1 Maize chlorotic mottle virus genomic RNA	4437	98.182	921	867		Negative	2.22e-20
								TRINITY_DN7633_c11_g1_i1	239	NC_003627.1 Maize chlorotic mottle virus genomic RNA	4437	98.795	4326	4408		Positive	3.28e-36
								TRINITY_DN7700_c0_g4_i1	257	NC_003627.1 Maize chlorotic mottle virus genomic RNA	4437	96.364	4182	4235		Positive	2.18e-18
								TRINITY_DN7639_c3_g6_i1	355	NC_003627.1 Maize chlorotic mottle virus genomic RNA	4437	93.056	2619	2549		Negative	1.1e-22
								TRINITY_DN7623_c7_g1_i2	380	NC_003627.1 Maize chlorotic mottle virus genomic RNA	4437	95.238	4232	4192		Negative	5.6e-11
								TRINITY_DN7698_c1_g2_i8	500	NC_003627.1 Maize chlorotic mottle virus genomic RNA	4437	94.444	856	909		Positive	2.06e-16
								TRINITY_DN6671_c0_g2_i1	230	NC_003627.1 Maize chlorotic mottle virus genomic RNA	4437	93.878	2192	2289		Positive	3.14e-36
								TRINITY_DN6626_c3_g1_i1	208	NC_003627.1 Maize chlorotic mottle virus genomic RNA	4437	100	187	215		Positive	6.3e-08
								TRINITY_DN46056_c0_g1_i1	257	NC_003627.1 Maize chlorotic mottle virus genomic RNA	4437	93.333	72	146		Positive	4.66e-25
								TRINITY_DN36942_c0_g1_i1	262	NC_003627.1 Maize chlorotic mottle virus genomic RNA	4437	95.918	1810	1762		Negative	4.82e-15
								TRINITY_DN46162_c0_g1_i1	369	NC_003627.1 Maize chlorotic mottle virus genomic RNA	4437	100	4234	4182		Negative	5.35e-21
								TRINITY_DN10309_c0_g1_i1	266	NC_003627.1 Maize chlorotic mottle virus genomic RNA	4437	100	4253	4180		Negative	7.98e-33
								TRINITY_DN10357_c0_g1_i1	281	NC_003627.1 Maize chlorotic mottle virus genomic RNA	4437	100	517	557		Positive	1.87e-14
								TRINITY_DN8172_c0_g1_i1	269	NC_003627.1 Maize chlorotic mottle virus genomic RNA	4437	98.649	3035	2962		Negative	3.76e-31
								TRINITY_DN9203_c0_g1_i1	318	NC_003627.1 Maize chlorotic mottle virus genomic RNA	4437	94.545	3388	3442		Positive	1.28e-16
								TRINITY_DN16604_c0_g1_i1	298	NC_003627.1 Maize chlorotic mottle virus genomic RNA	4437	100	921	879		Negative	1.54e-15
								TRINITY_DN21052_c0_g1_i1	209	NC_003627.1 Maize chlorotic mottle virus genomic RNA	4437	96.226	4184	4236		Positive	6.25e-18
								TRINITY_DN42155_c0_g1_i1	276	NC_003627.1 Maize chlorotic mottle virus genomic RNA	4437	100	755	787		Positive	5.14e-10
								TRINITY_DN39177_c0_g1_i1	297	NC_003627.1 Maize chlorotic mottle virus genomic RNA	4437	93.182	3040	3083		Positive	1.55e-10
								TRINITY_DN39144_c0_g1_i1	284	NC_003627.1 Maize chlorotic mottle virus genomic RNA	4437	91.011	3699	3787		Positive	8.63e-28
								TRINITY_DN6967_c2_g1_i1	258	NC_003627.1 Maize chlorotic mottle virus genomic RNA	4437	93.023	2344	2428		Positive	6.01e-29
								TRINITY_DN6916_c1_g1_i4	290	NC_003627.1 Maize chlorotic mottle virus genomic RNA	4437	95.495	2690	2800		Positive	5.16e-45
								TRINITY_DN6968_c0_g1_i1	255	NC_003627.1 Maize chlorotic mottle virus genomic RNA	4437	97.468	842	920		Positive	2.74e-32
								TRINITY_DN12726_c0_g1_i1	328	NC_003627.1 Maize chlorotic mottle virus genomic RNA	4437	100	957	1027		Positive	4.66e-31
								TRINITY_DN39736_c0_g1_i1	291	NC_003627.1 Maize chlorotic mottle virus genomic RNA	4437	97.561	1274	1355		Positive	6.8e-34
								TRINITY_DN2355_c0_g1_i1	217	NC_003627.1 Maize chlorotic mottle virus genomic RNA	4437	100	4180	4232		Positive	3.01e-21
								TRINITY_DN2719_c0_g2_i1	349	NC_003627.1 Maize chlorotic mottle virus genomic RNA	4437	97.619	858	817		Negative	3.06e-13
								TRINITY_DN22010_c0_g1_i1	318	NC_003627.1 Maize chlorotic mottle virus genomic RNA	4437	96.364	982	1035		Positive	2.75e-18
								TRINITY_DN35141_c0_g1_i1	201	NC_003627.1 Maize chlorotic mottle virus genomic RNA	4437	100	4235	4180		Negative	5.94e-23
								TRINITY_DN5221_c0_g1_i1	271	NC_003627.1 Maize chlorotic mottle virus genomic RNA	4437	97.619	869	910		Positive	2.33e-13
								TRINITY_DN30220_c0_g1_i1	436	NC_003627.1 Maize chlorotic mottle virus genomic RNA	4437	96.842	1809	1715		Negative	2.88e-39
								TRINITY_DN3534_c0_g3_i1	214	NC_003627.1 Maize chlorotic mottle virus genomic RNA	4437	97.778	908	864		Negative	3.86e-15
								TRINITY_DN7176_c5_g2_i3	658	NC_003627.1 Maize chlorotic mottle virus genomic RNA	4437	96.203	2961	3037		Positive	1.25e-29
								TRINITY_DN7159_c1_g1_i3	252	NC_003627.1 Maize chlorotic mottle virus genomic RNA	4437	98.734	3027	2949		Negative	5.81e-34
								TRINITY_DN7169_c1_g2_i2	305	NC_003627.1 Maize chlorotic mottle virus genomic RNA	4437	96.078	870	920		Positive	1.22e-16
								TRINITY_DN29604_c0_g1_i1	274	NC_003627.1 Maize chlorotic mottle virus genomic RNA	4437	100	3651	3679		Positive	8.54e-08
								TRINITY_DN21268_c0_g1_i1	321	NC_003627.1 Maize chlorotic mottle virus genomic RNA	4437	97.753	1631	1543		Negative	9.71e-38
								TRINITY_DN30914_c0_g1_i1	259	NC_003627.1 Maize chlorotic mottle virus genomic RNA	4437	98.148	920	867		Negative	4.73e-20
								TRINITY_DN38204_c0_g1_i1	271	NC_003627.1 Maize chlorotic mottle virus genomic RNA	4437	98.667	4414	4340		Negative	1.05e-31
								TRINITY_DN25812_c0_g1_i1	344	NC_003627.1 Maize chlorotic mottle virus genomic RNA	4437	91.667	4182	4238		Positive	1.8e-15
								TRINITY_DN12531_c0_g1_i1	236	NC_003627.1 Maize chlorotic mottle virus genomic RNA	4437	100	1324	1356		Positive	4.33e-10
								TRINITY_DN37632_c0_g1_i1	270	NC_003627.1 Maize chlorotic mottle virus genomic RNA	4437	95	928	869		Negative	4.95e-20
								TRINITY_DN5458_c0_g1_i1	275	NC_003627.1 Maize chlorotic mottle virus genomic RNA	4437	100	1809	1776		Negative	1.42e-10
								TRINITY_DN17390_c0_g1_i1	285	NC_003627.1 Maize chlorotic mottle virus genomic RNA	4437	100	912	879		Negative	1.48e-10
								TRINITY_DN45207_c0_g1_i1	302	NC_003627.1 Maize chlorotic mottle virus genomic RNA	4437	97.015	908	842		Negative	1.54e-25
								TRINITY_DN5615_c0_g1_i1	660	NC_003627.1 Maize chlorotic mottle virus genomic RNA	4437	100	928	1029		Positive	5.67e-48
								TRINITY_DN5616_c0_g1_i1	207	NC_003627.1 Maize chlorotic mottle virus genomic RNA	4437	100	4198	4235		Positive	6.22e-13
								TRINITY_DN39585_c0_g1_i1	260	NC_003627.1 Maize chlorotic mottle virus genomic RNA	4437	93.939	149	85		Negative	3.67e-21
								TRINITY_DN2821_c0_g1_i1	225	NC_003627.1 Maize chlorotic mottle virus genomic RNA	4437	95.918	869	917		Positive	4.08e-15
								TRINITY_DN2821_c0_g2_i1	247	NC_003627.1 Maize chlorotic mottle virus genomic RNA	4437	95.833	869	916		Positive	1.63e-14
								TRINITY_DN45640_c0_g1_i1	309	NC_003627.1 Maize chlorotic mottle virus genomic RNA	4437	100	1358	1326		Negative	5.81e-10
								TRINITY_DN13903_c0_g1_i1	316	NC_003627.1 Maize chlorotic mottle virus genomic RNA	4437	95.238	4031	4134		Positive	4.41e-41
								TRINITY_DN32855_c0_g1_i1	230	NC_003627.1 Maize chlorotic mottle virus genomic RNA	4437	95.556	4187	4230		Positive	7e-13
								TRINITY_DN11798_c0_g1_i1	318	NC_003627.1 Maize chlorotic mottle virus genomic RNA	4437	98.182	275	329		Positive	1.64e-20
								TRINITY_DN6502_c0_g1_i3	362	NC_003627.1 Maize chlorotic mottle virus genomic RNA	4437	94.737	871	926		Positive	1.14e-17
								TRINITY_DN218_c1_g1_i1	247	NC_003627.1 Maize chlorotic mottle virus genomic RNA	4437	100	2428	2456		Positive	7.62e-08
								TRINITY_DN222_c0_g1_i1	283	NC_003627.1 Maize chlorotic mottle virus genomic RNA	4437	96.721	1301	1422		Positive	8.3e-53
								TRINITY_DN209_c0_g1_i1	244	NC_003627.1 Maize chlorotic mottle virus genomic RNA	4437	94.231	2559	2662		Positive	1.55e-39
								TRINITY_DN35789_c1_g1_i1	206	NC_003627.1 Maize chlorotic mottle virus genomic RNA	4437	100	1538	1508		Negative	4.82e-09
								TRINITY_DN28840_c0_g1_i1	264	NC_003627.1 Maize chlorotic mottle virus genomic RNA	4437	93.103	4180	4237		Positive	2.91e-17
								TRINITY_DN7487_c6_g2_i6	258	NC_003627.1 Maize chlorotic mottle virus genomic RNA	4437	97.917	1809	1762		Negative	1.02e-16
								TRINITY_DN7429_c7_g1_i14	958	NC_003627.1 Maize chlorotic mottle virus genomic RNA	4437	91.2	1666	1543		Negative	1.08e-41
								TRINITY_DN7432_c15_g1_i1	226	NC_003627.1 Maize chlorotic mottle virus genomic RNA	4437	98.507	1034	968		Negative	2.42e-27
								TRINITY_DN7474_c1_g1_i1	252	NC_003627.1 Maize chlorotic mottle virus genomic RNA	4437	100	567	532		Negative	1e-11
								TRINITY_DN7500_c0_g1_i1	206	NC_003627.1 Maize chlorotic mottle virus genomic RNA	4437	97.701	844	930		Positive	7.73e-37
								TRINITY_DN7420_c6_g1_i1	229	NC_003627.1 Maize chlorotic mottle virus genomic RNA	4437	95.918	4230	4182		Negative	4.16e-15
								TRINITY_DN7403_c3_g1_i15	228	NC_003627.1 Maize chlorotic mottle virus genomic RNA	4437	97.436	2708	2671		Negative	3.22e-11
								TRINITY_DN28307_c0_g1_i1	264	NC_003627.1 Maize chlorotic mottle virus genomic RNA	4437	97.015	1807	1741		Negative	1.33e-25
								TRINITY_DN8672_c0_g1_i1	283	NC_003627.1 Maize chlorotic mottle virus genomic RNA	4437	94.898	2760	2857		Positive	3.05e-37
								TRINITY_DN21986_c0_g1_i1	285	NC_003627.1 Maize chlorotic mottle virus genomic RNA	4437	88.889	2670	2712		Positive	3.2e-07
								TRINITY_DN1275_c0_g1_i1	255	NC_003627.1 Maize chlorotic mottle virus genomic RNA	4437	97.938	3335	3430		Positive	9.72e-42
								TRINITY_DN19021_c0_g1_i1	229	NC_003627.1 Maize chlorotic mottle virus genomic RNA	4437	100	879	911		Positive	4.19e-10
								TRINITY_DN19033_c0_g1_i1	261	NC_003627.1 Maize chlorotic mottle virus genomic RNA	4437	96.154	4180	4230		Positive	1.03e-16
								TRINITY_DN43180_c0_g1_i1	296	NC_003627.1 Maize chlorotic mottle virus genomic RNA	4437	100	3016	3052		Positive	3.32e-12
								TRINITY_DN44710_c0_g1_i1	253	NC_003627.1 Maize chlorotic mottle virus genomic RNA	4437	98.214	2971	3026		Positive	3.56e-21
								TRINITY_DN43825_c0_g1_i1	269	NC_003627.1 Maize chlorotic mottle virus genomic RNA	4437	95.192	4078	4181		Positive	3.71e-41
								TRINITY_DN43822_c0_g1_i1	310	NC_003627.1 Maize chlorotic mottle virus genomic RNA	4437	96.341	783	702		Negative	3.39e-32
								TRINITY_DN16710_c0_g1_i1	255	NC_003627.1 Maize chlorotic mottle virus genomic RNA	4437	94.03	3746	3681		Negative	1e-21
								TRINITY_DN28706_c0_g1_i1	237	NC_003627.1 Maize chlorotic mottle virus genomic RNA	4437	98.113	281	333		Positive	1.54e-19
								TRINITY_DN14697_c0_g1_i1	224	NC_003627.1 Maize chlorotic mottle virus genomic RNA	4437	97.561	921	881		Negative	6.8e-13
								TRINITY_DN35644_c0_g1_i1	404	NC_003627.1 Maize chlorotic mottle virus genomic RNA	4437	97.297	880	915		Positive	7.73e-10
								TRINITY_DN16014_c0_g1_i1	229	NC_003627.1 Maize chlorotic mottle virus genomic RNA	4437	100	3024	2990		Negative	3.24e-11
								TRINITY_DN5866_c0_g1_i1	214	NC_003627.1 Maize chlorotic mottle virus genomic RNA	4437	95.714	3653	3721		Positive	3.81e-25
								TRINITY_DN18463_c0_g1_i1	376	NC_003627.1 Maize chlorotic mottle virus genomic RNA	4437	97.959	4211	4163		Negative	4.25e-17
								TRINITY_DN18406_c0_g1_i1	280	NC_003627.1 Maize chlorotic mottle virus genomic RNA	4437	96.296	870	923		Positive	2.4e-18
								TRINITY_DN35812_c0_g1_i1	268	NC_003627.1 Maize chlorotic mottle virus genomic RNA	4437	100	1447	1481		Positive	3.85e-11
								TRINITY_DN35855_c0_g1_i1	305	NC_003627.1 Maize chlorotic mottle virus genomic RNA	4437	96.721	2621	2561		Negative	3.38e-22
								TRINITY_DN34356_c0_g1_i2	202	NC_003627.1 Maize chlorotic mottle virus genomic RNA	4437	100	914	878		Negative	2.18e-12
								TRINITY_DN18913_c0_g1_i1	265	NC_003627.1 Maize chlorotic mottle virus genomic RNA	4437	98.361	4174	4233		Positive	2.24e-23
								TRINITY_DN29251_c0_g1_i1	261	NC_003627.1 Maize chlorotic mottle virus genomic RNA	4437	100	2188	2140		Negative	6.17e-19
								TRINITY_DN6790_c1_g1_i1	412	NC_003627.1 Maize chlorotic mottle virus genomic RNA	4437	93.443	2270	2330		Positive	1.01e-18
								TRINITY_DN20844_c0_g1_i1	263	NC_003627.1 Maize chlorotic mottle virus genomic RNA	4437	94.643	2571	2626		Positive	2.9e-17
								TRINITY_DN10738_c0_g1_i1	278	NC_003627.1 Maize chlorotic mottle virus genomic RNA	4437	98.438	1296	1359		Positive	1.41e-25
								TRINITY_DN18026_c0_g1_i1	304	NC_003627.1 Maize chlorotic mottle virus genomic RNA	4437	94.34	920	869		Negative	1.58e-15
								TRINITY_DN38829_c0_g1_i1	299	NC_003627.1 Maize chlorotic mottle virus genomic RNA	4437	100	4314	4344		Positive	7.25e-09
								TRINITY_DN10022_c0_g1_i1	294	NC_003627.1 Maize chlorotic mottle virus genomic RNA	4437	97.959	867	915		Positive	3.27e-17
								TRINITY_DN1796_c0_g1_i1	237	NC_003627.1 Maize chlorotic mottle virus genomic RNA	4437	90	4116	4047		Negative	5.55e-19
								TRINITY_DN23967_c0_g1_i1	300	NC_003627.1 Maize chlorotic mottle virus genomic RNA	4437	92.683	923	842		Negative	1.18e-26
								TRINITY_DN14191_c0_g1_i1	468	NC_003627.1 Maize chlorotic mottle virus genomic RNA	4437	97.101	715	783		Positive	1.9e-26
								TRINITY_DN5737_c1_g1_i1	263	NC_003627.1 Maize chlorotic mottle virus genomic RNA	4437	98.485	4343	4408		Positive	1.03e-26
								TRINITY_DN43557_c0_g1_i1	285	NC_003627.1 Maize chlorotic mottle virus genomic RNA	4437	98.413	2980	3042		Positive	5.21e-25
								TRINITY_DN41456_c0_g1_i1	253	NC_003627.1 Maize chlorotic mottle virus genomic RNA	4437	100	4216	4186		Negative	6.05e-09
								TRINITY_DN679_c1_g1_i1	203	NC_003627.1 Maize chlorotic mottle virus genomic RNA	4437	100	2581	2611		Positive	4.74e-09
								TRINITY_DN27346_c0_g1_i1	339	NC_003627.1 Maize chlorotic mottle virus genomic RNA	4437	98.148	4175	4227		Positive	2.28e-19
								TRINITY_DN45389_c0_g1_i1	304	NC_003627.1 Maize chlorotic mottle virus genomic RNA	4437	97.468	784	706		Negative	3.32e-32
								TRINITY_DN30434_c0_g1_i1	244	NC_003627.1 Maize chlorotic mottle virus genomic RNA	4437	98.387	3027	2966		Negative	1.58e-24
								TRINITY_DN17491_c0_g1_i2	250	NC_003627.1 Maize chlorotic mottle virus genomic RNA	4437	98.276	3429	3373		Negative	9.78e-22
								TRINITY_DN21405_c0_g1_i1	319	NC_003627.1 Maize chlorotic mottle virus genomic RNA	4437	95	2307	2268		Negative	1.67e-10
								TRINITY_DN44083_c0_g1_i1	266	NC_003627.1 Maize chlorotic mottle virus genomic RNA	4437	100	1026	910		Negative	9.96e-57
								TRINITY_DN7593_c8_g1_i1	258	NC_003627.1 Maize chlorotic mottle virus genomic RNA	4437	97.222	181	216		Positive	4.78e-10
								TRINITY_DN7569_c3_g1_i4	603	NC_003627.1 Maize chlorotic mottle virus genomic RNA	4437	96.078	3527	3477		Negative	2.51e-16
								TRINITY_DN7556_c0_g1_i9	463	NC_003627.1 Maize chlorotic mottle virus genomic RNA	4437	97.917	1807	1760		Negative	1.9e-16
								TRINITY_DN25327_c0_g1_i1	478	NC_003627.1 Maize chlorotic mottle virus genomic RNA	4437	100	3493	3465		Negative	1.54e-07
								TRINITY_DN42798_c0_g1_i1	277	NC_003627.1 Maize chlorotic mottle virus genomic RNA	4437	88.889	2575	2627		Positive	1.44e-10
								TRINITY_DN42746_c0_g1_i1	262	NC_003627.1 Maize chlorotic mottle virus genomic RNA	4437	97.872	596	642		Positive	3.73e-16
								TRINITY_DN20517_c0_g1_i1	308	NC_003627.1 Maize chlorotic mottle virus genomic RNA	4437	95	2980	3038		Positive	2.05e-19
								TRINITY_DN3109_c0_g1_i1	225	NC_003627.1 Maize chlorotic mottle virus genomic RNA	4437	94.286	2225	2156		Negative	5.2e-24
								TRINITY_DN4463_c0_g1_i2	266	NC_003627.1 Maize chlorotic mottle virus genomic RNA	4437	94.805	2549	2625		Positive	8.04e-28
								TRINITY_DN3212_c0_g1_i1	206	NC_003627.1 Maize chlorotic mottle virus genomic RNA	4437	94.937	4262	4340		Positive	4.68e-29
								TRINITY_DN24210_c0_g2_i1	383	NC_003627.1 Maize chlorotic mottle virus genomic RNA	4437	97.531	1035	955		Negative	1.18e-32
								TRINITY_DN33511_c0_g1_i2	207	NC_003627.1 Maize chlorotic mottle virus genomic RNA	4437	93.939	142	77		Negative	7.94e-22
								TRINITY_DN27841_c0_g1_i1	258	NC_003627.1 Maize chlorotic mottle virus genomic RNA	4437	97.917	1760	1807		Positive	1.02e-16
								TRINITY_DN23287_c0_g1_i1	424	NC_003627.1 Maize chlorotic mottle virus genomic RNA	4437	97.321	2685	2796		Positive	9.95e-49
								TRINITY_DN34182_c0_g1_i1	242	NC_003627.1 Maize chlorotic mottle virus genomic RNA	4437	96.97	1326	1358		Positive	2.07e-08
								TRINITY_DN19611_c0_g1_i1	303	NC_003627.1 Maize chlorotic mottle virus genomic RNA	4437	94.697	1352	1482		Positive	8.93e-53
								TRINITY_DN31087_c0_g1_i1	394	NC_003627.1 Maize chlorotic mottle virus genomic RNA	4437	98.182	867	921		Positive	2.06e-20
								TRINITY_DN14849_c0_g1_i1	231	NC_003627.1 Maize chlorotic mottle virus genomic RNA	4437	94.937	1464	1386		Negative	5.32e-29
								TRINITY_DN16957_c0_g1_i1	350	NC_003627.1 Maize chlorotic mottle virus genomic RNA	4437	95.192	4235	4132		Negative	1.77e-40
								TRINITY_DN11624_c0_g1_i1	224	NC_003627.1 Maize chlorotic mottle virus genomic RNA	4437	100	2694	2667		Negative	2.46e-07
								TRINITY_DN7741_c7_g1_i14	292	NC_003627.1 Maize chlorotic mottle virus genomic RNA	4437	96.386	702	784		Positive	8.83e-33
								TRINITY_DN7750_c6_g1_i1	292	NC_003627.1 Maize chlorotic mottle virus genomic RNA	4437	95	2342	2284		Negative	1.94e-19
								TRINITY_DN7750_c31_g1_i1	2767	NC_003627.1 Maize chlorotic mottle virus genomic RNA	4437	96.68	4414	1885		Negative	0
								TRINITY_DN7750_c31_g1_i2	208	NC_003627.1 Maize chlorotic mottle virus genomic RNA	4437	97.059	571	505		Negative	1.03e-25
								TRINITY_DN7750_c31_g1_i3	371	NC_003627.1 Maize chlorotic mottle virus genomic RNA	4437	96.33	231	14		Negative	2.24e-99
								TRINITY_DN7750_c31_g1_i4	245	NC_003627.1 Maize chlorotic mottle virus genomic RNA	4437	96.032	1906	1782		Negative	7.09e-53
								TRINITY_DN7750_c31_g1_i5	341	NC_003627.1 Maize chlorotic mottle virus genomic RNA	4437	97.49	252	14		Negative	2e-114
								TRINITY_DN7750_c31_g1_i6	251	NC_003627.1 Maize chlorotic mottle virus genomic RNA	4437	98.969	3499	3403		Negative	2.05e-43
								TRINITY_DN7750_c31_g1_i7	260	NC_003627.1 Maize chlorotic mottle virus genomic RNA	4437	100	642	545		Negative	3.55e-46
								TRINITY_DN7750_c31_g1_i8	289	NC_003627.1 Maize chlorotic mottle virus genomic RNA	4437	93.75	513	370		Negative	1.09e-56
								TRINITY_DN7750_c31_g1_i9	2836	NC_003627.1 Maize chlorotic mottle virus genomic RNA	4437	96.681	4415	1885		Negative	0
								TRINITY_DN7750_c31_g1_i10	221	NC_003627.1 Maize chlorotic mottle virus genomic RNA	4437	93.805	1346	1234		Negative	6.42e-43
								TRINITY_DN7750_c31_g1_i12	251	NC_003627.1 Maize chlorotic mottle virus genomic RNA	4437	96.032	1359	1234		Negative	2.02e-53
								TRINITY_DN7750_c31_g1_i13	279	NC_003627.1 Maize chlorotic mottle virus genomic RNA	4437	94.304	527	370		Negative	1.73e-64
								TRINITY_DN7750_c31_g1_i14	227	NC_003627.1 Maize chlorotic mottle virus genomic RNA	4437	95.283	3047	2943		Negative	8.55e-42
								TRINITY_DN7750_c31_g1_i15	264	NC_003627.1 Maize chlorotic mottle virus genomic RNA	4437	98	329	230		Negative	6.03e-44
								TRINITY_DN7750_c31_g1_i16	278	NC_003627.1 Maize chlorotic mottle virus genomic RNA	4437	97.581	3133	3010		Negative	1.35e-55
								TRINITY_DN7750_c31_g1_i17	285	NC_003627.1 Maize chlorotic mottle virus genomic RNA	4437	97.059	755	620		Negative	1.38e-60
								TRINITY_DN7750_c31_g5_i1	205	NC_003627.1 Maize chlorotic mottle virus genomic RNA	4437	97.561	1379	1339		Negative	6.16e-13
								TRINITY_DN7750_c31_g1_i18	207	NC_003627.1 Maize chlorotic mottle virus genomic RNA	4437	96.875	715	620		Negative	3.59e-40
								TRINITY_DN7750_c31_g1_i19	265	NC_003627.1 Maize chlorotic mottle virus genomic RNA	4437	96.8	3134	3010		Negative	1.66e-54
								TRINITY_DN7750_c31_g1_i20	254	NC_003627.1 Maize chlorotic mottle virus genomic RNA	4437	92.308	2418	2316		Negative	1.26e-35
								TRINITY_DN7750_c31_g1_i21	262	NC_003627.1 Maize chlorotic mottle virus genomic RNA	4437	95	1372	1234		Negative	2.72e-57
								TRINITY_DN7750_c31_g1_i22	351	NC_003627.1 Maize chlorotic mottle virus genomic RNA	4437	93.627	573	370		Negative	3.61e-82
								TRINITY_DN7750_c31_g1_i23	212	NC_003627.1 Maize chlorotic mottle virus genomic RNA	4437	95.146	790	689		Negative	3.69e-40
								TRINITY_DN7750_c31_g1_i24	290	NC_003627.1 Maize chlorotic mottle virus genomic RNA	4437	93.038	1390	1234	156	Negative	5.06e-60
								TRINITY_DN7750_c31_g1_i25	4514	NC_003627.1 Maize chlorotic mottle virus genomic RNA	4437	96.705	4414	14	4400	Negative	0
								TRINITY_DN7750_c31_g1_i26	278	NC_003627.1 Maize chlorotic mottle virus genomic RNA	4437	98.165	1890	1782	108	Negative	6.34e-49
								TRINITY_DN7750_c31_g1_i27	4583	NC_003627.1 Maize chlorotic mottle virus genomic RNA	4437	96.706	4415	14	4401	Negative	0
								TRINITY_DN7750_c31_g1_i28	205	NC_003627.1 Maize chlorotic mottle virus genomic RNA	4437	97.273	4045	3936	109	Negative	5.86e-48
								TRINITY_DN7750_c31_g1_i29	297	NC_003627.1 Maize chlorotic mottle virus genomic RNA	4437	96.97	3604	3473	131	Negative	2.41e-58
								TRINITY_DN7757_c1_g2_i5	494	NC_003627.1 Maize chlorotic mottle virus genomic RNA	4437	98.148	3043	2990	53	Negative	9.4e-20
								TRINITY_DN7796_c1_g2_i5	222	NC_003627.1 Maize chlorotic mottle virus genomic RNA	4437	100	2459	2411	48	Negative	5.16e-19
								TRINITY_DN7743_c9_g1_i1	282	NC_003627.1 Maize chlorotic mottle virus genomic RNA	4437	95.192	4111	4008	103	Negative	3.9e-41
								TRINITY_DN7760_c4_g1_i11	891	NC_003627.1 Maize chlorotic mottle virus genomic RNA	4437	97.015	4352	4418	-66	Positive	1.72e-24
								TRINITY_DN7760_c4_g6_i2	218	NC_003627.1 Maize chlorotic mottle virus genomic RNA	4437	98.077	4180	4231	-51	Positive	5.06e-19
								TRINITY_DN7753_c3_g4_i1	368	NC_003627.1 Maize chlorotic mottle virus genomic RNA	4437	96.117	1646	1544	102	Negative	4.01e-42
								TRINITY_DN7753_c3_g1_i19	252	NC_003627.1 Maize chlorotic mottle virus genomic RNA	4437	94.355	1666	1544	122	Negative	2.05e-48
								TRINITY_DN7749_c12_g1_i1	425	NC_003627.1 Maize chlorotic mottle virus genomic RNA	4437	98.182	4234	4180	54	Negative	2.24e-20
								TRINITY_DN7774_c3_g1_i21	246	NC_003627.1 Maize chlorotic mottle virus genomic RNA	4437	91.892	146	73	73	Negative	7.43e-23
								TRINITY_DN7801_c2_g1_i1	377	NC_003627.1 Maize chlorotic mottle virus genomic RNA	4437	98.667	2953	3027	-74	Positive	1.5e-31
								TRINITY_DN7795_c2_g1_i9	599	NC_003627.1 Maize chlorotic mottle virus genomic RNA	4437	99	4313	4412	-99	Positive	3.09e-45
								TRINITY_DN24376_c0_g1_i1	337	NC_003627.1 Maize chlorotic mottle virus genomic RNA	4437	96.154	1013	962	51	Negative	3.78e-17
								TRINITY_DN24383_c0_g1_i2	301	NC_003627.1 Maize chlorotic mottle virus genomic RNA	4437	94.681	2157	2250	-93	Positive	1.52e-35
								TRINITY_DN24390_c0_g1_i1	256	NC_003627.1 Maize chlorotic mottle virus genomic RNA	4437	100	4219	4254	-35	Positive	1.02e-11
								TRINITY_DN7834_c11_g3_i1	339	NC_003627.1 Maize chlorotic mottle virus genomic RNA	4437	88.889	4416	4354	62	Negative	2.29e-14
								TRINITY_DN7836_c4_g1_i1	258	NC_003627.1 Maize chlorotic mottle virus genomic RNA	4437	100	2690	2663	27	Negative	2.88e-07
								TRINITY_DN7870_c17_g2_i2	286	NC_003627.1 Maize chlorotic mottle virus genomic RNA	4437	95.238	4114	4031	83	Negative	4.02e-31
								TRINITY_DN7864_c14_g3_i1	298	NC_003627.1 Maize chlorotic mottle virus genomic RNA	4437	98.649	4343	4415	-72	Positive	1.51e-30
								TRINITY_DN7864_c14_g5_i1	216	NC_003627.1 Maize chlorotic mottle virus genomic RNA	4437	98.333	3029	2970	59	Negative	1.79e-23
								TRINITY_DN7810_c5_g4_i1	214	NC_003627.1 Maize chlorotic mottle virus genomic RNA	4437	98.333	4234	4175	59	Negative	6.37e-23
								TRINITY_DN7888_c36_g3_i1	385	NC_003627.1 Maize chlorotic mottle virus genomic RNA	4437	98.81	3497	3414	83	Negative	1.52e-36
								TRINITY_DN7838_c6_g3_i1	328	NC_003627.1 Maize chlorotic mottle virus genomic RNA	4437	100	1559	1525	34	Negative	4.79e-11
								TRINITY_DN7852_c3_g2_i1	207	NC_003627.1 Maize chlorotic mottle virus genomic RNA	4437	94	4232	4184	48	Negative	4.81e-14
								TRINITY_DN7812_c1_g1_i17	2331	NC_003627.1 Maize chlorotic mottle virus genomic RNA	4437	99.123	4409	4296	113	Negative	2.04e-52
								TRINITY_DN7886_c7_g1_i1	205	NC_003627.1 Maize chlorotic mottle virus genomic RNA	4437	100	1557	1509	48	Negative	4.73e-19
								TRINITY_DN7877_c6_g1_i7	591	NC_003627.1 Maize chlorotic mottle virus genomic RNA	4437	95.238	925	842	83	Negative	2.4e-31
								TRINITY_DN7814_c12_g9_i2	386	NC_003627.1 Maize chlorotic mottle virus genomic RNA	4437	95.745	4184	4230	-46	Positive	9.47e-14
								TRINITY_DN7332_c16_g1_i1	205	NC_003627.1 Maize chlorotic mottle virus genomic RNA	4437	90.741	334	281	53	Negative	1.71e-13
								TRINITY_DN7323_c5_g4_i3	764	NC_003627.1 Maize chlorotic mottle virus genomic RNA	4437	89.583	575	529	46	Negative	5.39e-09
								TRINITY_DN7389_c8_g7_i1	383	NC_003627.1 Maize chlorotic mottle virus genomic RNA	4437	96.923	1378	1314	64	Negative	9.26e-24
								TRINITY_DN7377_c0_g16_i1	315	NC_003627.1 Maize chlorotic mottle virus genomic RNA	4437	97.826	879	924	-45	Positive	1.64e-15
								TRINITY_DN7326_c3_g1_i1	218	NC_003627.1 Maize chlorotic mottle virus genomic RNA	4437	95.522	2433	2367	66	Negative	5.03e-24
[truncated: 58 more columns]

## Sheet: Sheet12
Maize RNA sequencing analysis
Sample	Unique_Contigs
Sample	Unique_Contigs
Sample	Unique_Contigs
Sample	Unique_Contigs
Sample	Unique_Contigs
Sample	Unique_Contigs
Sample	Unique_Contigs
Sample	Unique_Contigs
Sample	Unique_Contigs
Sample	Unique_Contigs
Sample	Unique_Contigs
Sample	Unique_Contigs
Sample	Unique_Contigs
Sample	Unique_Contigs
Sample	Unique_Contigs
Sample	Unique_Contigs
Sample	Unique_Contigs
Sample	Unique_Contigs
Sample	Unique_Contigs
Sample	Unique_Contigs
Sample	Unique_Contigs
Sample	Unique_Contigs
Sample	Unique_Contigs
Sample	Unique_Contigs
24	ßß
	matching to Virus
	matching to Virus
	matching to Virus
	matching to Virus
	matching to Virus
	matching to Virus
	matching to Virus
	matching to Virus
	matching to Virus
	matching to Virus
	matching to Virus
	matching to Virus
	matching to Virus
	matching to Virus
	matching to Virus
	matching to Virus
	matching to Virus
	matching to Virus
	matching to Virus
	matching to Virus
	matching to Virus
	matching to Virus
	matching to Virus
	matching to Virus
23	292
21	206
13	127
12	117
11	106
16	86
6	75
18	35
17	32
5	31
4	30
8	25
9	21
14	20
20	16
1	14
19	13
22	12
7	10
15	10
2	7
3	7
1
1
1
1
1
2
2
2
2
2
3
3
3
4
4
4
4
4
4
4
4
4
4
4
4
4
4
4
4
4
4
4
5
5
6
6
6
6
6
6
6
6
6
6
6
6
6
6
6
6
6
6
6
6
6
6
6
6
6
6
6
6
6
6
6
6
6
6
6
6
6
6
6
6
6
6
6
6
6
6
6
6
6
6
6
6
6
6
6
6
6
6
6
6
6
6
6
6
7
7
7
7
7
7
7
7
8
8
8
8
8
8
8
8
8
8
8
8
8
8
8
8
8
9
9
9
9
9
9
9
10
10
10
10
10
10
10
10
11
11
11
11
11
11
11
12
12
12
12
12
12
12
13
13
13
13
13
13
13
14
14
14
14
14
14
14
15
15
15
15
15
15
15
16
16
16
16
16
16
16
17
17
17
17
17
17
17
18
18
18
18
18
18
18
19
19
19
19
19
19
19
20
20
20
20
20
20
20
21
21
21
21
21
21
21
22
22
22
22
22
22
22
23
23
23
23
23
23
23
24
24
24
24
24
24
24

## Sheet: Sheet13
1	14
2	7
3	7
4	30
5	31
6	75
7	10
8	25
9	21
11	106
12	117
13	127
14	20
15	10
16	86
17	32
18	35
19	13
20	16
21	206
22	12
23	292

## Sheet: Table_1
Table 1	Pre and post assembly statistic from illumina Miseq data of virus infected plants
Sample	Symptomatic	Total	Clean reads	Assembled	Total contigs	%	Contigs unmapped	Unique Contigs matching
	Asymptomatic	Reads	(after trimming)	Contigs	hit to NCBI	mapping	to NCBI	to Viruses (with NCBI/PVGs)
1	Symptomatic	1294075	1276223 (98.62%)	53709	36930	68.7594	16779	14
2	Symptomatic	1082692	1071424 (98.96%)	2397	2155	89.904	242	7
3	Symptomatic	799100	784998 (98.24%)	32996	24405	73.9635	8591	7
4	Symptomatic	687779	680389 (98.93%)	1957	1641	83.8528	316	30
5	Symptomatic	520393	516160 (99.19%)	629	583	92.6868	46	31
6	Symptomatic	439279	435234 (99.08%)	2694	2264	84.0386	430	75
7	Asymptomatic	460009	454294 (98.76%)	5019	4127	82.2275	892	10
8	Asymptomatic	1019166	1013956 (99.49%)	2328	2106	90.4639	222	25
9	Asymptomatic	780057	758854 (97.28%)	1517	1393	91.826	124	21
11	Symptomatic	750584	748621 (99.74%)	176246	115513	65.5408	60733	106
12	Symptomatic	840531	832226 (99.01%)	16755	13708	81.8144	3047	117
13	Symptomatic	1046670	1037260 (99.10%)	12327	8894	72.1506	3433	127
14	Asymptomatic	1019166	1013956 (99.49%)	104881	27339	26.0667	77542	20
15	Asymptomatic	950703	931701 (98.00%)	16329	12396	75.914	3933	10
16	Symptomatic	751589	737966 (98.19%)	64572	46854	72.5609	17718	86
17	Asymptomatic	791822	780319 (98.55%)	39076	26798	68.5792	12278	32
18	Symptomatic	658945	651519 (98.87%)	2486	2136	85.9212	350	35
19	Symptomatic	856119	846432 (98.87%)	12313	9710	78.8597	2603	13
20	Asymptomatic	615872	606959 (98.55%)	36305	24770	68.2275	11535	16
21	Symptomatic	688119	679884 (98.80%)	56850	41871	73.6517	14979	206
22	Symptomatic	682940	677365 (99.18%)	737	701	95.1153	36	12
23	Symptomatic	959933	945078 (98.45%)	50159	38139	76.0362	12020	292
24	Symptomatic	921952	913051 (99.03%)	76211	52941	69.4664	23270	240
25	Symptomatic	644666	635974 (98.65%)	35346	28353	80.2156	6993	256
26	Symptomatic	796315	776775 (97.55%)	29574	24246	81.9842	5328	462
27	Symptomatic	605758	590020 (97.40%)	12458	9221	74.0167	3237	340
28	Asymptomatic	915620	900650 (98.37%)	8441	6876	81.4595	1565	48
29	Symptomatic	695276	676866 (97.35%)	17514	13391	76.4588	4123	22
30	Symptomatic	872896	857206 (98.20%)	50314	36283	72.1131	14031	365
31	Asymptomatic	832730	815619 (97.95%)	1051	873	83.0637	178	11
32	Asymptomatic	446408	384721 (86.18%)	21958	16593	75.567	5365	16
33	Symptomatic	603654	591017 (97.91%)	34060	24675	72.4457	9385	286
34	Asymptomatic	937249	909700 (97.06%)	4313	3401	78.8546	912	14
35	Symptomatic	511646	502358 (98.18%)	96044	29903	31.1347	66141	11
36	Symptomatic	793986	783614 (98.69%)	11608	9036	77.8429	2572	25
37	Symptomatic	790681	750568 (94.93%)	10779	8945	82.9854	1834	33
38	Symptomatic	1011146	987750 (97.69%)	89373	60410	67.5931	28963	258
39	Asymptomatic	949951	941995 (99.16%)	4262	3455	81.0652	807	15
40	Asymptomatic	685278	674496 (98.43%)	17957	13941	77.6355	4016	236
41	Asymptomatic	944690	926113 (98.03%)	28612	21262	74.3115	7350	304
42	Symptomatic	713698	708594 (99.28%)	727	642	88.3081	85	31
43	Symptomatic	415587	397030 (95.53%)	50381	34892	69.2563	15489	14
44	Symptomatic	785278	742393 (94.54%)	45173	34399	76.1495	10774	507
45	Symptomatic	930892	923200 (99.17%)	3541	2968	83.8181	573	80
46	Asymptomatic	554686	547146 (98.64%)	68268	47652	69.8014	20616	191
47	Asymptomatic	868818	856197 (98.55%)	28752	21177	73.654	7575	17
48	Symptomatic	756679	714887 (94.48%)	19686	13494	68.5462	6192	114
49	Symptomatic	1143061	1108276 (96.96%)	16010	14597	91.1743	1413	265
50	Symptomatic	1151898	1113942 (96.70%)	51810	45599	88.012	6211	84
51	Symptomatic	1223011	1181483 (96.60%)	44041	38623	87.6978	5418	152
52	Asymptomatic	1286024	1246433 (96.92%)	9670	7774	80.393	1896	25
53	Symptomatic	1998450	1949931 (97.57%)	46243	35254	76.2364	10989	16
54	Symptomatic	1181829	1146940 (97.05%)	1010	980	97.0297	30	98
55	Asymptomatic	377854	351542 (93.04%)	45002	11429	25.3966	33573	6
56	Symptomatic	1674767	1622725 (96.89%)	5148	4822	93.6674	326	233
57	Symptomatic	548987	532140 (96.93%)	18648	15343	82.2769	3305	118
58	Symptomatic	1299962	1252696 (96.36%)	5275	4309	81.6872	966	177
59	Symptomatic	628751	598561 (95.20%)	12781	10847	84.8682	1934	65
60	Asymptomatic	946874	913382 (96.46%)	21760	18529	85.1517	3231	43
61	Symptomatic	1144868	1105291 (96.54%)	16491	15066	91.3589	1425	11
62	Symptomatic	877604	851410 (97.02%)	48304	39910	82.6226	8394	7
63	Symptomatic	758749	719335 (94.81%)	116611	37071	31.7903	79540	51
64	Asymptomatic	800999	773145 (96.52%)	5213	4559	87.4544	654	12
65	Symptomatic	91964	86409 (93.96%)	145	136	93.7931	9	12
66	Symptomatic	586910	551541 (93.97%)	29688	24525	82.6091	5163	108
67	Symptomatic	1420728	1379762 (97.12%)	3620	3077	85	543	24
68	Symptomatic	657047	628532 (95.66%)	48717	43015	88.2957	5702	121
69	Symptomatic	1535121	1484873 (96.73%)	4782	4371	91.4053	411	14
70	Symptomatic	2443368	2372523 (97.10%)	2215	2140	96.614	75	77
71	Symptomatic	1805862	1735470 (96.10%)	87056	65156	74.8438	21900	111
72	Symptomatic	2220755	2150510 (96.84%)	4852	4325	89.1385	527	25

## Sheet: Supplementray Table 1
Additional File 1: Table S1	Description of samples used for identification of viruses associated to MLN in Kenya by a metagenomic analysis.
Sample	Symptomatic /	Raw	Clean reads	Clean reads	Trinity assembled	Average	Total contigs	Total contigs	Contigs unmapped	Unique Contigs matching
number	asymptomatic	Reads	(after trimming)	(%)	Contigs	length of contigs (bp)	hits to NCBI	hits to NCBI (%)	to NCBI	to a virus ( either with NCBI or PVGs)
3	Symptomatic	520393	516160	99.1866	629	476	583	92.6868	46	31
4	Symptomatic	439279	435234	99.0792	2694	340	2264	84.0386	430	75
5	Asymptomatic	460009	454294	98.7576	5019	390	4127	82.2275	892	10
6	Asymptomatic	1019166	1013956	99.4888	2328	384	2106	90.4639	222	25
7	Asymptomatic	780057	758854	97.2819	1517	393	1393	91.826	124	21
8	Symptomatic	750584	748621	99.7385	176246	301	115513	65.5408	60733	106
9	Symptomatic	840531	832226	99.0119	16755	320	13708	81.8144	3047	117
10	Symptomatic	1046670	1037260	99.101	12327	320	8894	72.1506	3433	127
11	Asymptomatic	1019166	1013956	99.4888	104881	330	27339	26.0667	77542	20
12	Asymptomatic	950703	931701	98.0013	16329	328	12396	75.914	3933	10
13	Symptomatic	751589	737966	98.1874	64572	318	46854	72.5609	17718	86
14	Asymptomatic	791822	780319	98.5473	39076	334	26798	68.5792	12278	32
15	Symptomatic	658945	651519	98.873	2486	377	2136	85.9212	350	35
16	Asymptomatic	615872	606959	98.5528	36305	329	24770	68.2275	11535	16
17	Symptomatic	688119	679884	98.8033	56850	318	41871	73.6517	14979	206
18	Symptomatic	682940	677365	99.1837	737	370	701	95.1153	36	12
20	Symptomatic	921952	913051	99.0345	76211	311	52941	69.4664	23270	240
21	Symptomatic	644666	635974	98.6517	35346	320	28353	80.2156	6993	256
22	Symptomatic	796315	776775	97.5462	29574	318	24246	81.9842	5328	462
23	Symptomatic	605758	590020	97.4019	12458	333	9221	74.0167	3237	340
24	Asymptomatic	915620	900650	98.365	8441	333	6876	81.4595	1565	48
25	Symptomatic	695276	676866	97.3521	17514	333	13391	76.4588	4123	22
26	Symptomatic	872896	857206	98.2025	50314	344	36283	72.1131	14031	365
27	Asymptomatic	832730	815619	97.9452	1051	335	873	83.0637	178	11
28	Asymptomatic	446408	384721	86.1815	21958	339	16593	75.567	5365	16
29	Symptomatic	603654	591017	97.9066	34060	318	24675	72.4457	9385	286
30	Asymptomatic	937249	909700	97.0607	4313	358	3401	78.8546	912	14
31	Symptomatic	511646	502358	98.1847	96044	329	29903	31.1347	66141	11
32	Symptomatic	793986	783614	98.6937	11608	334	9036	77.8429	2572	25
33	Symptomatic	790681	750568	94.9268	10779	310	8945	82.9854	1834	33
34	Symptomatic	1011146	987750	97.6862	89373	332	60410	67.5931	28963	258
35	Asymptomatic	949951	941995	99.1625	4262	344	3455	81.0652	807	15
36	Asymptomatic	685278	674496	98.4266	17957	342	13941	77.6355	4016	236
37	Asymptomatic	944690	926113	98.0335	28612	429	21262	74.3115	7350	304
38	Symptomatic	713698	708594	99.2849	727	329	642	88.3081	85	31
39	Symptomatic	415587	397030	95.5347	50381	315	34892	69.2563	15489	14
40	Symptomatic	785278	742393	94.5389	45173	355	34399	76.1495	10774	507
41	Symptomatic	930892	923200	99.1737	3541	336	2968	83.8181	573	80
42	Asymptomatic	554686	547146	98.6407	68268	329	47652	69.8014	20616	191
43	Asymptomatic	868818	856197	98.5473	28752	318	21177	73.654	7575	17
44	Symptomatic	756679	714887	94.4769	19686	330	13494	68.5462	6192	114
45	Symptomatic	1143061	1108276	96.9569	16010	317	14597	91.1743	1413	265
46	Symptomatic	1151898	1113942	96.7049	51810	318	45599	88.012	6211	84
47	Symptomatic	1223011	1181483	96.6044	44041	342	38623	87.6978	5418	152
48	Asymptomatic	1286024	1246433	96.9214	9670	318	7774	80.393	1896	25
49	Symptomatic	1998450	1949931	97.5722	46243	283	35254	76.2364	10989	16
50	Symptomatic	1181829	1146940	97.0479	1010	462	980	97.0297	30	98
51	Asymptomatic	377854	351542	93.0365	45002	343	11429	25.3966	33573	6
52	Symptomatic	1674767	1622725	96.8926	5148	342	4822	93.6674	326	233
53	Symptomatic	548987	532140	96.9313	18648	331	15343	82.2769	3305	118
54	Symptomatic	1299962	1252696	96.364	5275	281	4309	81.6872	966	177
55	Symptomatic	628751	598561	95.1984	12781	290	10847	84.8682	1934	65
56	Asymptomatic	946874	913382	96.4629	21760	313	18529	85.1517	3231	43
57	Symptomatic	1144868	1105291	96.5431	16491	312	15066	91.3589	1425	11
58	Symptomatic	877604	851410	97.0153	48304	323	39910	82.6226	8394	7
59	Symptomatic	758749	719335	94.8054	116611	329	37071	31.7903	79540	51
60	Asymptomatic	800999	773145	96.5226	5213	336	4559	87.4544	654	12
61	Symptomatic	91964	86409	93.9596	145	448	136	93.7931	9	12
62	Symptomatic	586910	551541	93.9737	29688	344	24525	82.6091	5163	108
63	Symptomatic	1420728	1379762	97.1165	3620	348	3077	85	543	24
64	Symptomatic	657047	628532	95.6601	48717	351	43015	88.2957	5702	121
65	Symptomatic	1535121	1484873	96.7268	4782	340	4371	91.4053	411	14
66	Symptomatic	2443368	2372523	97.1005	2215	370	2140	96.614	75	77
67	Symptomatic	1805862	1735470	96.102	87056	316	65156	74.8438	21900	111
68	Symptomatic	2220755	2150510	96.8369	4852	342	4325	89.1385	527	25
	Total	58806828	57241066	NA	1950246	NA	NA	NA
	Average	904720	880632	97.2507	30003.8	340.015	20029.8	77.8931	9973.95	102.769
	Std Error	211836	205652	1.04181	16955.2	18.3466	10281.7	7.51858	8731.26	58.7131

## Sheet: Sheet4
24405	-0.74			32677
1641	-0.84			1619
583	-0.93			153
2264	-0.84			2354
4127	-0.82			4629
2106	-0.9			1944
1393	-0.92			1124
115513	-0.66			175945
13708	-0.82			16435
8894	-0.72			12007
27339	-0.26			104551
12396	-0.76			16001
46854	-0.73			64254
26798	-0.69			38742
2136	-0.86			2109
24770	-0.68			35976
41871	-0.74			56532
701	-0.95			367
38139	-0.76			49845
52941	-0.69			75900
28353	-0.8			35026
24246	-0.82			29256
9221	-0.74			12125
6876	-0.81			8108
13391	-0.76			17181
36283	-0.72			49970
873	-0.83			716
16593	-0.76			21619
24675	-0.72			33742
3401	-0.79			3955
29903	-0.31			95715
9036	-0.78			11274
8945	-0.83			10469
60410	-0.84			89041
3455	-0.81			3918
13941	-0.78			17615
21262	-0.74			28183
642	-0.88			398
34892	-0.69			50066
34399	-0.76			44818
2968	-0.84			3205
47652	-0.7			67939
21177	-0.74			28434
13494	-0.69			19356
14597				15693
45599	-0.88			51492
38623				43699
7774	-0.8			9352
35254	-0.76			45960
980	-0.97			548
11429	-0.25			44659
4822	-0.94			4806
15343	-0.82			18317
4309	-0.82			4994
10847	-0.85			12491
18529	-0.85			21447
15066	-0.91			16179
39910	-0.83			47981
37071	-0.32			116282
4559	-0.87			4877						1366124
136	-0.94			303
24525	-0.83			29344
3077	-0.85			3272
43015	-0.88			48366
4371	-0.91			4442
2140	-0.97			1845
65156	-0.75			86740
4325	-0.89			4510
				2012892
1366124
				-646768		67.8687

## Sheet: Sheet16
49	265
51	152
52	25
53	16
54	98
55	6
56	233
57	118
58	177
59	65
60	43
61	11
62	7
63	51
64	12
65	12
66	108
67	24
68	121
69	14
70	77
71	111
72	25
	84

## Sheet: Sheet6
Maize RNA sequencing analysis
63	758749	116611
71	1805862	87056
	1151898	51810
68	657047	48717
62	877604	48304
53	1998450	46243
55	377854	45002
51	1223011	44041
66	586910	29688
60	946874	21760
57	548987	18648
61	1144868	16491
49	1143061	16010
59	628751	12781
52	1286024	9670
58	1299962	5275
64	800999	5213
56	1674767	5148
72	2220755	4852
69	1535121	4782
67	1420728	3620
70	2443368	2215
54	1181829	1010
65	91964	145
50
50
50
50
50
50
50
51
51
51
51
51
52
52
52
52
52
53
53
53
53
53
53
53
53
53
53
53
53
53
54
54
54
54
54
54
54
54
54
54
54
54
54
54
54
54
54
54
54
55
55
55
55
55
55
55
55
56
56
56
56
56
56
56
56
56
56
56
56
56
57
57
57
57
57
57
57
58
58
58
58
58
58
58
59
59
59
59
59
59
59
60
60
60
60
60
60
60
61
61
61
61
61
61
61
62
62
62
62
62
62
62
63
63
63
63
63
63
63
64
64
64
64
64
64
64
65
65
65
65
65
65
65
66
66
66
66
66
66
66
67
67
67
67
67
67
67
68
68
68
68
68
68
68
69
69
69
69
69
69
69
70
70
70
70
70
70
70
71
71
71
71
71
71
71
72
72
72
72
72
72
72

## Sheet: Run2
	Maize RNA sequencing analysis																																											Any other virus
								Maize yellow dwarf virus-RMV2									Sugarcane mosaic virus									Maize streak virus											Maize chlorotic mottle virus genomic RNA							Hubei Poty-like virus 1 strain SCM51506 polyprotein gene
Researcher	Sample	Host	Total	Total	Unique_Contigs	Total	Contigs	Conting	Conting	Reference	Reference	%	Coordinates		Polarity	E	Contig	Conting	Reference	Reference	%	Coordinates		Polarity	E	Conting	Conting	Reference	Reference	%	Coordinates		Polarity	E	Conting	Conting	Reference	Reference	%	Coordinates		Polarity	E	Conting	Conting	Reference	Reference	%	Coordinates
		Maize Leaf	Sequences	Contigs	matching to Virus	virus	Unmatch_to _PVGDB/NCBI		Length		Length	identity	Start	End		value		Length		Length	identity	Start	End		value		Length		Length	identity	Start	End		value		Length		Length	identity	Start	End		value		Length		Length	identity	Start
	25		644666	35346	256	5	6994	TRINITY_DN3452_c0_g1_i1	1546	NC_029990.1 Maize yellow dwarf virus-RMV2	5625	98.06	2028	3573	Positive	0	TRINITY_DN8286_c0_g1_i1	301	NC_003398.1 Sugarcane mosaic virus	9596	94.314	8977	9275	Positive	1.71e-129	TRINITY_DN981_c0_g1_i2	1471	NC_001346.2 Maize streak virus - A[Ama]	2689	95.928	1716	2599	Positive	0	TRINITY_DN3711_c51_g1_i3	4540	NC_003627.1 Maize chlorotic mottle virus genomic RNA	4437	96.64	4415	11	Negative	0	TRINITY_DN15377_c0_g1_i1	278	NC_032912.1 Hubei Poty-like virus 1 strain SCM51506 polyprotein gene	9356	79.926	1577
	25							TRINITY_DN3350_c0_g1_i2	1277	NC_029990.1 Maize yellow dwarf virus-RMV2	5625	95.223	5523	4289	Negative	0	TRINITY_DN3923_c0_g1_i1	278	NC_003398.1 Sugarcane mosaic virus	9596	89.744	8669	8941	Positive	9.88e-97	TRINITY_DN981_c0_g1_i2	1471	NC_001346.2 Maize streak virus - A[Ama]	2689	98.625	1317	809	Negative	0	TRINITY_DN3711_c51_g1_i7	4525	NC_003627.1 Maize chlorotic mottle virus genomic RNA	4437	96.635	4408	11	Negative	0
	25							TRINITY_DN3350_c0_g1_i1	1178	NC_029990.1 Maize yellow dwarf virus-RMV2	5625	95.018	5372	4289	Negative	0										TRINITY_DN981_c0_g1_i1	1011	NC_001346.2 Maize streak virus - A[Ama]	2689	95.691	1716	2620	Positive	0	TRINITY_DN3711_c51_g1_i2	4498	NC_003627.1 Maize chlorotic mottle virus genomic RNA	4437	96.617	4414	11	Negative	0
	25							TRINITY_DN767_c0_g1_i1	845	NC_029990.1 Maize yellow dwarf virus-RMV2	5625	97.041	970	1814	Positive	0										TRINITY_DN14939_c0_g1_i1	528	NC_001346.2 Maize streak virus - A[Ama]	2689	97.594	376	748	Positive	0	TRINITY_DN3711_c51_g1_i4	4488	NC_003627.1 Maize chlorotic mottle virus genomic RNA	4437	96.64	4415	11	Negative	0
	25							TRINITY_DN3180_c0_g1_i1	341	NC_029990.1 Maize yellow dwarf virus-RMV2	5625	96.45	345	8	Negative	1.88e-159										TRINITY_DN2026_c0_g1_i1	343	NC_001346.2 Maize streak virus - A[Ama]	2689	99	1661	1362	Negative	2.46e-153	TRINITY_DN3700_c4_g1_i6	2053	NC_003627.1 Maize chlorotic mottle virus genomic RNA	4437	100	1522	1550	Positive	6.87e-07
	25							TRINITY_DN10788_c0_g1_i1	243	NC_029990.1 Maize yellow dwarf virus-RMV2	5625	97.942	3896	3657	Negative	2.3e-117										TRINITY_DN2026_c0_g1_i1	343	NC_001346.2 Maize streak virus - A[Ama]	2689	100	1221	1261	Positive	2.32e-14	TRINITY_DN3700_c4_g1_i7	2050	NC_003627.1 Maize chlorotic mottle virus genomic RNA	4437	100	1522	1550	Positive	6.86e-07
	25							TRINITY_DN7225_c0_g1_i1	229	NC_029990.1 Maize yellow dwarf virus-RMV2	5625	98.69	924	696	Negative	4.67e-114										TRINITY_DN1359_c0_g1_i1	266	NC_001346.2 Maize streak virus - A[Ama]	2689	98.8	1	250	Positive	1.17e-125	TRINITY_DN3700_c4_g1_i21	1813	NC_003627.1 Maize chlorotic mottle virus genomic RNA	4437	100	1522	1550	Positive	6.06e-07
	25																																		TRINITY_DN3700_c4_g1_i14	1810	NC_003627.1 Maize chlorotic mottle virus genomic RNA	4437	100	1522	1550	Positive	6.05e-07
	25																																		TRINITY_DN3669_c6_g3_i2	1660	NC_003627.1 Maize chlorotic mottle virus genomic RNA	4437	93.458	2733	2839	Positive	1.14e-38
	25																																		TRINITY_DN3559_c11_g1_i17	1623	NC_003627.1 Maize chlorotic mottle virus genomic RNA	4437	97.436	4288	4404	Positive	6.57e-51
	25																																		TRINITY_DN3559_c11_g1_i9	1610	NC_003627.1 Maize chlorotic mottle virus genomic RNA	4437	97.436	4288	4404	Positive	6.52e-51
	25																																		TRINITY_DN3700_c4_g1_i11	1566	NC_003627.1 Maize chlorotic mottle virus genomic RNA	4437	100	1522	1550	Positive	5.22e-07
	25																																		TRINITY_DN3700_c4_g1_i4	1381	NC_003627.1 Maize chlorotic mottle virus genomic RNA	4437	100	1522	1550	Positive	4.6e-07
	25																																		TRINITY_DN3700_c4_g1_i18	1355	NC_003627.1 Maize chlorotic mottle virus genomic RNA	4437	100	1522	1550	Positive	4.51e-07
	25																																		TRINITY_DN3700_c4_g1_i20	1283	NC_003627.1 Maize chlorotic mottle virus genomic RNA	4437	100	1522	1550	Positive	4.26e-07
	25																																		TRINITY_DN3660_c5_g1_i3	1013	NC_003627.1 Maize chlorotic mottle virus genomic RNA	4437	96.61	4415	4358	Negative	5.49e-20
	25																																		TRINITY_DN3882_c8_g1_i4	943	NC_003627.1 Maize chlorotic mottle virus genomic RNA	4437	97.436	532	570	Positive	4e-11
	25																																		TRINITY_DN3711_c51_g1_i6	837	NC_003627.1 Maize chlorotic mottle virus genomic RNA	4437	96.038	3168	2437	Negative	0
	25																																		TRINITY_DN3536_c7_g1_i10	783	NC_003627.1 Maize chlorotic mottle virus genomic RNA	4437	88.732	856	923	Positive	3.28e-16
	25																																		TRINITY_DN3536_c7_g1_i7	763	NC_003627.1 Maize chlorotic mottle virus genomic RNA	4437	88.732	856	923	Positive	3.2e-16
	25																																		TRINITY_DN3845_c3_g1_i10	755	NC_003627.1 Maize chlorotic mottle virus genomic RNA	4437	94.186	2287	2202	Negative	1.11e-30
	25																																		TRINITY_DN3588_c9_g2_i3	668	NC_003627.1 Maize chlorotic mottle virus genomic RNA	4437	96.078	2011	2061	Positive	2.79e-16
	25																																		TRINITY_DN3882_c8_g3_i1	667	NC_003627.1 Maize chlorotic mottle virus genomic RNA	4437	97.436	532	570	Positive	2.8e-11
	25																																		TRINITY_DN3536_c7_g1_i9	667	NC_003627.1 Maize chlorotic mottle virus genomic RNA	4437	88.732	856	923	Positive	2.78e-16
	25																																		TRINITY_DN3588_c9_g2_i2	667	NC_003627.1 Maize chlorotic mottle virus genomic RNA	4437	96.078	2011	2061	Positive	2.78e-16
	25																																		TRINITY_DN3630_c4_g1_i7	643	NC_003627.1 Maize chlorotic mottle virus genomic RNA	4437	96.341	4324	4243	Negative	7.29e-32
	25																																		TRINITY_DN3543_c8_g3_i5	570	NC_003627.1 Maize chlorotic mottle virus genomic RNA	4437	96.19	2794	2690	Negative	4.9e-43
	25																																		TRINITY_DN3630_c4_g1_i5	561	NC_003627.1 Maize chlorotic mottle virus genomic RNA	4437	96.341	4324	4243	Negative	6.33e-32
	25																																		TRINITY_DN10597_c0_g1_i1	552	NC_003627.1 Maize chlorotic mottle virus genomic RNA	4437	94.915	4101	4043	Negative	3.8e-19
	25																																		TRINITY_DN3693_c3_g1_i4	516	NC_003627.1 Maize chlorotic mottle virus genomic RNA	4437	96.809	811	904	Positive	1.24e-38
	25																																		TRINITY_DN3316_c0_g1_i1	510	NC_003627.1 Maize chlorotic mottle virus genomic RNA	4437	96.512	3055	2970	Negative	3.42e-34
	25																																		TRINITY_DN3775_c1_g1_i3	510	NC_003627.1 Maize chlorotic mottle virus genomic RNA	4437	95.312	842	905	Positive	5.81e-22
	25																																		TRINITY_DN5417_c0_g1_i1	510	NC_003627.1 Maize chlorotic mottle virus genomic RNA	4437	98.276	3205	3262	Positive	5.81e-22
	25																																		TRINITY_DN3693_c3_g1_i15	505	NC_003627.1 Maize chlorotic mottle virus genomic RNA	4437	96.809	811	904	Positive	1.21e-38
	25																																		TRINITY_DN10597_c0_g1_i2	504	NC_003627.1 Maize chlorotic mottle virus genomic RNA	4437	94.915	4101	4043	Negative	3.45e-19
	25																																		TRINITY_DN3543_c8_g3_i9	503	NC_003627.1 Maize chlorotic mottle virus genomic RNA	4437	96.19	2794	2690	Negative	4.3e-43
	25																																		TRINITY_DN3262_c0_g1_i2	499	NC_003627.1 Maize chlorotic mottle virus genomic RNA	4437	86.792	824	876	Positive	1.25e-08
	25																																		TRINITY_DN3775_c1_g1_i2	482	NC_003627.1 Maize chlorotic mottle virus genomic RNA	4437	95.312	842	905	Positive	5.47e-22
	25																																		TRINITY_DN11649_c0_g1_i1	463	NC_003627.1 Maize chlorotic mottle virus genomic RNA	4437	95.37	4132	4238	Positive	1.42e-42
	25																																		TRINITY_DN3543_c8_g3_i6	457	NC_003627.1 Maize chlorotic mottle virus genomic RNA	4437	96.19	2794	2690	Negative	3.89e-43
	25																																		TRINITY_DN3629_c4_g2_i2	456	NC_003627.1 Maize chlorotic mottle virus genomic RNA	4437	95.506	2709	2797	Positive	3.04e-34
	25																																		TRINITY_DN2120_c0_g1_i3	455	NC_003627.1 Maize chlorotic mottle virus genomic RNA	4437	93.939	2221	2286	Positive	1.85e-21
	25																																		TRINITY_DN3480_c0_g1_i2	450	NC_003627.1 Maize chlorotic mottle virus genomic RNA	4437	97.619	1342	1301	Negative	3.99e-13
	25																																		TRINITY_DN3711_c51_g1_i12	448	NC_003627.1 Maize chlorotic mottle virus genomic RNA	4437	96.845	1762	1447	Negative	1.96e-150
	25																																		TRINITY_DN3316_c0_g1_i2	445	NC_003627.1 Maize chlorotic mottle virus genomic RNA	4437	96.512	3055	2970	Negative	2.97e-34
	25																																		TRINITY_DN3629_c4_g2_i1	444	NC_003627.1 Maize chlorotic mottle virus genomic RNA	4437	95.506	2709	2797	Positive	2.96e-34
	25																																		TRINITY_DN3289_c0_g2_i1	440	NC_003627.1 Maize chlorotic mottle virus genomic RNA	4437	100	2677	2718	Positive	8.38e-15
	25																																		TRINITY_DN4108_c0_g1_i1	432	NC_003627.1 Maize chlorotic mottle virus genomic RNA	4437	100	949	1030	Positive	4.79e-37
	25																																		TRINITY_DN14874_c0_g1_i1	431	NC_003627.1 Maize chlorotic mottle virus genomic RNA	4437	96.629	3735	3647	Negative	6.18e-36
	25																																		TRINITY_DN3543_c8_g3_i7	429	NC_003627.1 Maize chlorotic mottle virus genomic RNA	4437	96.19	2794	2690	Negative	3.65e-43
	25																																		TRINITY_DN3711_c51_g1_i13	424	NC_003627.1 Maize chlorotic mottle virus genomic RNA	4437	98.507	1029	762	Negative	8.82e-134
	25																																		TRINITY_DN3711_c51_g1_i16	417	NC_003627.1 Maize chlorotic mottle virus genomic RNA	4437	98.162	1032	762	Negative	8.67e-134
	25																																		TRINITY_DN3630_c4_g1_i4	417	NC_003627.1 Maize chlorotic mottle virus genomic RNA	4437	96.341	4324	4243	Negative	4.65e-32
	25																																		TRINITY_DN2120_c0_g1_i1	415	NC_003627.1 Maize chlorotic mottle virus genomic RNA	4437	93.939	2221	2286	Positive	1.69e-21
	25																																		TRINITY_DN3711_c51_g1_i1	414	NC_003627.1 Maize chlorotic mottle virus genomic RNA	4437	98.214	1041	762	Negative	8.54e-139
	25																																		TRINITY_DN7995_c0_g1_i1	413	NC_003627.1 Maize chlorotic mottle virus genomic RNA	4437	97.368	654	617	Negative	6.12e-11
	25																																		TRINITY_DN3316_c0_g2_i1	408	NC_003627.1 Maize chlorotic mottle virus genomic RNA	4437	96.512	3055	2970	Negative	2.71e-34
	25																																		TRINITY_DN3711_c51_g1_i8	406	NC_003627.1 Maize chlorotic mottle virus genomic RNA	4437	97.428	1757	1447	Negative	4.93e-151
	25																																		TRINITY_DN10992_c0_g1_i1	403	NC_003627.1 Maize chlorotic mottle virus genomic RNA	4437	98.913	2649	2740	Positive	5.72e-41
	25																																		TRINITY_DN3861_c7_g1_i7	399	NC_003627.1 Maize chlorotic mottle virus genomic RNA	4437	95.192	2427	2529	Positive	2.03e-40
	25																																		TRINITY_DN3711_c51_g1_i11	399	NC_003627.1 Maize chlorotic mottle virus genomic RNA	4437	97.436	1758	1447	Negative	1.35e-151
	25																																		TRINITY_DN3599_c2_g2_i4	399	NC_003627.1 Maize chlorotic mottle virus genomic RNA	4437	97.297	379	415	Positive	2.12e-10
	25																																		TRINITY_DN9154_c0_g1_i2	398	NC_003627.1 Maize chlorotic mottle virus genomic RNA	4437	95.652	2798	2707	Negative	5.68e-36
	25																																		TRINITY_DN4514_c0_g1_i1	396	NC_003627.1 Maize chlorotic mottle virus genomic RNA	4437	95.699	2248	2156	Negative	1.57e-36
	25																																		TRINITY_DN9154_c0_g1_i1	394	NC_003627.1 Maize chlorotic mottle virus genomic RNA	4437	95.652	2798	2707	Negative	5.62e-36
	25																																		TRINITY_DN1000_c0_g1_i1	388	NC_003627.1 Maize chlorotic mottle virus genomic RNA	4437	94.444	1986	1861	Negative	7e-50
	25																																		TRINITY_DN1543_c0_g1_i1	379	NC_003627.1 Maize chlorotic mottle virus genomic RNA	4437	96.703	880	790	Negative	4.17e-37
	25																																		TRINITY_DN3387_c0_g1_i5	375	NC_003627.1 Maize chlorotic mottle virus genomic RNA	4437	100	3355	3391	Positive	4.27e-12
	25																																		TRINITY_DN3695_c9_g3_i1	375	NC_003627.1 Maize chlorotic mottle virus genomic RNA	4437	99	942	1041	Positive	1.89e-45
	25																																		TRINITY_DN1730_c0_g2_i1	368	NC_003627.1 Maize chlorotic mottle virus genomic RNA	4437	98.795	959	1041	Positive	5.23e-36
	25																																		TRINITY_DN3774_c6_g1_i16	367	NC_003627.1 Maize chlorotic mottle virus genomic RNA	4437	98.551	928	860	Negative	3.16e-28
	25																																		TRINITY_DN6867_c0_g1_i1	366	NC_003627.1 Maize chlorotic mottle virus genomic RNA	4437	97.222	3005	3040	Positive	6.96e-10
	25																																		TRINITY_DN3464_c0_g2_i3	365	NC_003627.1 Maize chlorotic mottle virus genomic RNA	4437	97.087	1539	1641	Positive	8.55e-44
	25																																		TRINITY_DN171_c0_g2_i1	365	NC_003627.1 Maize chlorotic mottle virus genomic RNA	4437	97.183	490	560	Positive	1.13e-27
	25																																		TRINITY_DN3262_c0_g1_i1	364	NC_003627.1 Maize chlorotic mottle virus genomic RNA	4437	86.792	824	876	Positive	8.96e-09
	25																																		TRINITY_DN10039_c0_g1_i1	362	NC_003627.1 Maize chlorotic mottle virus genomic RNA	4437	94.34	930	879	Negative	1.9e-15
	25																																		TRINITY_DN3877_c9_g2_i2	360	NC_003627.1 Maize chlorotic mottle virus genomic RNA	4437	96.226	1811	1760	Negative	4.06e-17
	25																																		TRINITY_DN4866_c0_g1_i3	357	NC_003627.1 Maize chlorotic mottle virus genomic RNA	4437	97.143	913	879	Negative	2.44e-09
	25																																		TRINITY_DN3552_c8_g1_i1	356	NC_003627.1 Maize chlorotic mottle virus genomic RNA	4437	95.918	3048	3001	Negative	6.71e-15
	25																																		TRINITY_DN3146_c1_g1_i1	356	NC_003627.1 Maize chlorotic mottle virus genomic RNA	4437	98.795	2427	2509	Positive	5.05e-36
	25																																		TRINITY_DN7321_c0_g1_i1	355	NC_003627.1 Maize chlorotic mottle virus genomic RNA	4437	93.333	2285	2226	Negative	3.09e-18
	25																																		TRINITY_DN3627_c4_g3_i2	353	NC_003627.1 Maize chlorotic mottle virus genomic RNA	4437	97.647	4173	4257	Positive	1.8e-35
	25																																		TRINITY_DN3397_c1_g1_i1	351	NC_003627.1 Maize chlorotic mottle virus genomic RNA	4437	100	4089	4061	Negative	1.11e-07
	25																																		TRINITY_DN3711_c51_g1_i5	350	NC_003627.1 Maize chlorotic mottle virus genomic RNA	4437	98.168	1034	762	Negative	2e-134
	25																																		TRINITY_DN3774_c6_g1_i24	345	NC_003627.1 Maize chlorotic mottle virus genomic RNA	4437	98.551	928	860	Negative	2.96e-28
	25																																		TRINITY_DN14020_c0_g1_i1	345	NC_003627.1 Maize chlorotic mottle virus genomic RNA	4437	97.059	921	854	Negative	4.95e-26
	25																																		TRINITY_DN3552_c8_g1_i3	342	NC_003627.1 Maize chlorotic mottle virus genomic RNA	4437	95.918	3048	3001	Negative	6.43e-15
	25																																		TRINITY_DN13096_c0_g1_i1	336	NC_003627.1 Maize chlorotic mottle virus genomic RNA	4437	100	1541	1508	Negative	1.77e-10
	25																																		TRINITY_DN3042_c0_g1_i3	331	NC_003627.1 Maize chlorotic mottle virus genomic RNA	4437	98.864	3052	2965	Negative	7.76e-39
	25																																		TRINITY_DN3552_c8_g1_i2	330	NC_003627.1 Maize chlorotic mottle virus genomic RNA	4437	95.918	3048	3001	Negative	6.19e-15
	25																																		TRINITY_DN3680_c7_g2_i8	329	NC_003627.1 Maize chlorotic mottle virus genomic RNA	4437	92.708	1610	1705	Positive	1e-32
	25																																		TRINITY_DN3857_c4_g1_i8	328	NC_003627.1 Maize chlorotic mottle virus genomic RNA	4437	97.059	4335	4302	Negative	8.01e-09
	25																																		TRINITY_DN14755_c0_g1_i2	325	NC_003627.1 Maize chlorotic mottle virus genomic RNA	4437	100	3053	3013	Negative	2.19e-14
	25																																		TRINITY_DN11047_c0_g1_i1	323	NC_003627.1 Maize chlorotic mottle virus genomic RNA	4437	97.17	311	207	Negative	5.8e-45
	25																																		TRINITY_DN3387_c0_g1_i4	323	NC_003627.1 Maize chlorotic mottle virus genomic RNA	4437	100	3355	3391	Positive	3.64e-12
	25																																		TRINITY_DN3464_c0_g2_i2	323	NC_003627.1 Maize chlorotic mottle virus genomic RNA	4437	97.087	1539	1641	Positive	7.5e-44
	25																																		TRINITY_DN14269_c0_g1_i1	323	NC_003627.1 Maize chlorotic mottle virus genomic RNA	4437	100	639	519	Negative	7.34e-59
	25																																		TRINITY_DN15374_c0_g1_i1	322	NC_003627.1 Maize chlorotic mottle virus genomic RNA	4437	91.228	4416	4361	Negative	2.17e-14
	25																																		TRINITY_DN3397_c1_g1_i3	321	NC_003627.1 Maize chlorotic mottle virus genomic RNA	4437	100	4089	4061	Negative	1.01e-07
	25																																		TRINITY_DN3695_c4_g1_i1	321	NC_003627.1 Maize chlorotic mottle virus genomic RNA	4437	96.552	917	802	Negative	2.06e-49
	25																																		TRINITY_DN2978_c1_g1_i1	318	NC_003627.1 Maize chlorotic mottle virus genomic RNA	4437	100	2532	2483	Negative	2.13e-19
	25																																		TRINITY_DN3630_c4_g1_i6	317	NC_003627.1 Maize chlorotic mottle virus genomic RNA	4437	96.341	4324	4243	Negative	3.47e-32
	25																																		TRINITY_DN114_c0_g1_i1	314	NC_003627.1 Maize chlorotic mottle virus genomic RNA	4437	95.652	884	928	Positive	2.73e-13
	25																																		TRINITY_DN3579_c5_g2_i12	313	NC_003627.1 Maize chlorotic mottle virus genomic RNA	4437	98.734	4101	4179	Positive	7.36e-34
	25																																		TRINITY_DN11336_c0_g1_i1	310	NC_003627.1 Maize chlorotic mottle virus genomic RNA	4437	100	2531	2503	Negative	9.76e-08
	25																																		TRINITY_DN14370_c0_g1_i1	308	NC_003627.1 Maize chlorotic mottle virus genomic RNA	4437	98.571	3249	3318	Positive	7.28e-29
	25																																		TRINITY_DN3877_c9_g2_i1	308	NC_003627.1 Maize chlorotic mottle virus genomic RNA	4437	96.226	1811	1760	Negative	3.44e-17
	25																																		TRINITY_DN9991_c0_g1_i1	308	NC_003627.1 Maize chlorotic mottle virus genomic RNA	4437	93.333	3031	3090	Positive	2.66e-18
	25																																		TRINITY_DN7433_c0_g1_i1	308	NC_003627.1 Maize chlorotic mottle virus genomic RNA	4437	97.872	1808	1762	Negative	4.44e-16
	25																																		TRINITY_DN5413_c0_g1_i1	306	NC_003627.1 Maize chlorotic mottle virus genomic RNA	4437	95.294	2850	2934	Positive	3.34e-32
	25																																		TRINITY_DN9846_c0_g1_i1	305	NC_003627.1 Maize chlorotic mottle virus genomic RNA	4437	96	571	497	Negative	2.59e-28
	25																																		TRINITY_DN14493_c0_g1_i1	305	NC_003627.1 Maize chlorotic mottle virus genomic RNA	4437	88.679	577	526	Negative	1.59e-10
	25																																		TRINITY_DN7234_c0_g1_i1	304	NC_003627.1 Maize chlorotic mottle virus genomic RNA	4437	96	1384	1260	Negative	8.96e-53
	25																																		TRINITY_DN15845_c0_g1_i2	304	NC_003627.1 Maize chlorotic mottle virus genomic RNA	4437	96.581	2677	2793	Positive	5.4e-50
	25																																		TRINITY_DN5491_c0_g1_i1	301	NC_003627.1 Maize chlorotic mottle virus genomic RNA	4437	100	4321	4407	Positive	5.41e-40
	25																																		TRINITY_DN3552_c8_g1_i5	299	NC_003627.1 Maize chlorotic mottle virus genomic RNA	4437	95.918	3048	3001	Negative	5.57e-15
	25																																		TRINITY_DN1338_c0_g1_i1	299	NC_003627.1 Maize chlorotic mottle virus genomic RNA	4437	100	1509	1544	Positive	1.21e-11
	25																																		TRINITY_DN15592_c0_g1_i1	298	NC_003627.1 Maize chlorotic mottle virus genomic RNA	4437	96.721	2262	2202	Negative	3.29e-22
	25																																		TRINITY_DN2340_c0_g1_i3	295	NC_003627.1 Maize chlorotic mottle virus genomic RNA	4437	91.15	2857	2748	Negative	1.15e-36
	25																																		TRINITY_DN721_c0_g1_i1	295	NC_003627.1 Maize chlorotic mottle virus genomic RNA	4437	97.959	4415	4319	Negative	3.17e-42
	25																																		TRINITY_DN3716_c1_g1_i1	294	NC_003627.1 Maize chlorotic mottle virus genomic RNA	4437	100	1554	1510	Negative	1.18e-16
	25																																		TRINITY_DN8065_c0_g1_i1	294	NC_003627.1 Maize chlorotic mottle virus genomic RNA	4437	95.349	2962	3047	Positive	3.2e-32
	25																																		TRINITY_DN12843_c0_g1_i1	292	NC_003627.1 Maize chlorotic mottle virus genomic RNA	4437	95.122	419	379	Negative	1.52e-10
	25																																		TRINITY_DN9787_c0_g1_i1	292	NC_003627.1 Maize chlorotic mottle virus genomic RNA	4437	89.091	4186	4237	Positive	4.23e-11
	25																																		TRINITY_DN3537_c2_g3_i7	290	NC_003627.1 Maize chlorotic mottle virus genomic RNA	4437	93.814	3435	3340	Negative	5.24e-35
	25																																		TRINITY_DN1797_c0_g1_i2	290	NC_003627.1 Maize chlorotic mottle virus genomic RNA	4437	100	4186	4254	Positive	5.27e-30
	25																																		TRINITY_DN6999_c0_g1_i1	289	NC_003627.1 Maize chlorotic mottle virus genomic RNA	4437	95.763	4109	3993	Negative	2.38e-48
	25																																		TRINITY_DN12182_c0_g1_i1	288	NC_003627.1 Maize chlorotic mottle virus genomic RNA	4437	100	4346	4412	Positive	6.77e-29
	25																																		TRINITY_DN2340_c0_g1_i1	286	NC_003627.1 Maize chlorotic mottle virus genomic RNA	4437	92.661	2856	2748	Negative	6.63e-39
	25																																		TRINITY_DN16747_c0_g1_i1	286	NC_003627.1 Maize chlorotic mottle virus genomic RNA	4437	97.619	4204	4121	Negative	5.16e-35
	25																																		TRINITY_DN6463_c0_g1_i1	285	NC_003627.1 Maize chlorotic mottle virus genomic RNA	4437	100	4198	4243	Positive	3.16e-17
	25																																		TRINITY_DN3027_c0_g1_i2	283	NC_003627.1 Maize chlorotic mottle virus genomic RNA	4437	96.491	4358	4414	Positive	1.87e-19
	25																																		TRINITY_DN6922_c0_g1_i1	283	NC_003627.1 Maize chlorotic mottle virus genomic RNA	4437	94.872	2683	2798	Positive	3.89e-46
	25																																		TRINITY_DN15014_c0_g1_i1	282	NC_003627.1 Maize chlorotic mottle virus genomic RNA	4437	97.872	519	565	Positive	1.45e-15
	25																																		TRINITY_DN5477_c0_g1_i1	281	NC_003627.1 Maize chlorotic mottle virus genomic RNA	4437	99	4413	4314	Negative	1.39e-45
	25																																		TRINITY_DN9017_c0_g1_i1	278	NC_003627.1 Maize chlorotic mottle virus genomic RNA	4437	100	4198	4249	Positive	1.42e-20
	25																																		TRINITY_DN3387_c0_g1_i1	276	NC_003627.1 Maize chlorotic mottle virus genomic RNA	4437	100	3355	3391	Positive	3.07e-12
	25																																		TRINITY_DN3792_c8_g4_i1	276	NC_003627.1 Maize chlorotic mottle virus genomic RNA	4437	95.833	227	180	Negative	5.11e-15
	25																																		TRINITY_DN3700_c4_g2_i2	276	NC_003627.1 Maize chlorotic mottle virus genomic RNA	4437	97.727	3499	3456	Negative	1.84e-14
	25																																		TRINITY_DN14204_c0_g1_i1	276	NC_003627.1 Maize chlorotic mottle virus genomic RNA	4437	97.959	980	1027	Positive	1.1e-16
	25																																		TRINITY_DN4378_c0_g1_i1	275	NC_003627.1 Maize chlorotic mottle virus genomic RNA	4437	97.015	4144	4210	Positive	1.39e-25
	25																																		TRINITY_DN15453_c0_g1_i1	274	NC_003627.1 Maize chlorotic mottle virus genomic RNA	4437	95.122	1023	984	Negative	1.42e-10
	25																																		TRINITY_DN16705_c0_g1_i1	274	NC_003627.1 Maize chlorotic mottle virus genomic RNA	4437	95.181	1814	1732	Negative	3.83e-31
	25																																		TRINITY_DN3552_c8_g1_i4	272	NC_003627.1 Maize chlorotic mottle virus genomic RNA	4437	95.918	3048	3001	Negative	5.03e-15
	25																																		TRINITY_DN3189_c2_g1_i1	271	NC_003627.1 Maize chlorotic mottle virus genomic RNA	4437	97.17	3627	3732	Positive	1.33e-45
	25																																		TRINITY_DN12726_c0_g1_i1	270	NC_003627.1 Maize chlorotic mottle virus genomic RNA	4437	97.674	4012	4097	Positive	3.75e-36
	25																																		TRINITY_DN2308_c0_g1_i1	269	NC_003627.1 Maize chlorotic mottle virus genomic RNA	4437	96.825	3667	3729	Positive	2.28e-23
	25																																		TRINITY_DN12192_c0_g1_i1	267	NC_003627.1 Maize chlorotic mottle virus genomic RNA	4437	96.774	1567	1628	Positive	8.13e-23
	25																																		TRINITY_DN11334_c0_g1_i1	266	NC_003627.1 Maize chlorotic mottle virus genomic RNA	4437	97.561	376	416	Positive	8.21e-13
	25																																		TRINITY_DN5563_c0_g1_i1	264	NC_003627.1 Maize chlorotic mottle virus genomic RNA	4437	96.226	90	142	Positive	8.08e-18
	25																																		TRINITY_DN13577_c0_g1_i1	263	NC_003627.1 Maize chlorotic mottle virus genomic RNA	4437	98.276	3137	3080	Negative	2.87e-22
	25																																		TRINITY_DN10409_c0_g1_i1	262	NC_003627.1 Maize chlorotic mottle virus genomic RNA	4437	100	3425	3356	Negative	1.31e-30
	25																																		TRINITY_DN3792_c6_g1_i3	261	NC_003627.1 Maize chlorotic mottle virus genomic RNA	4437	100	901	1024	Positive	1.25e-60
	25																																		TRINITY_DN3028_c0_g1_i1	260	NC_003627.1 Maize chlorotic mottle virus genomic RNA	4437	91.837	2475	2521	Positive	1.04e-11
	25																																		TRINITY_DN3006_c0_g3_i1	260	NC_003627.1 Maize chlorotic mottle virus genomic RNA	4437	95.775	932	862	Negative	3.65e-26
	25																																		TRINITY_DN3844_c4_g2_i1	260	NC_003627.1 Maize chlorotic mottle virus genomic RNA	4437	98.387	1483	1544	Positive	1.7e-24
	25																																		TRINITY_DN3572_c4_g2_i14	258	NC_003627.1 Maize chlorotic mottle virus genomic RNA	4437	94.643	864	919	Positive	2.84e-17
	25																																		TRINITY_DN7100_c0_g1_i1	257	NC_003627.1 Maize chlorotic mottle virus genomic RNA	4437	97.561	4188	4228	Positive	7.91e-13
	25																																		TRINITY_DN3695_c9_g2_i1	257	NC_003627.1 Maize chlorotic mottle virus genomic RNA	4437	100	983	1029	Positive	7.85e-18
	25																																		TRINITY_DN7805_c0_g1_i1	256	NC_003627.1 Maize chlorotic mottle virus genomic RNA	4437	97.436	3177	3253	Positive	3.56e-31
	25																																		TRINITY_DN1114_c0_g1_i2	255	NC_003627.1 Maize chlorotic mottle virus genomic RNA	4437	94.186	3210	3125	Negative	1.28e-30
	25																																		TRINITY_DN2247_c0_g1_i1	254	NC_003627.1 Maize chlorotic mottle virus genomic RNA	4437	92.424	142	77	Negative	4.63e-20
	25																																		TRINITY_DN9172_c0_g1_i1	254	NC_003627.1 Maize chlorotic mottle virus genomic RNA	4437	100	917	879	Negative	2.17e-13
	25																																		TRINITY_DN3737_c1_g2_i2	253	NC_003627.1 Maize chlorotic mottle virus genomic RNA	4437	98.148	1324	1377	Positive	4.61e-20
	25																																		TRINITY_DN8432_c0_g1_i1	251	NC_003627.1 Maize chlorotic mottle virus genomic RNA	4437	95.238	535	575	Positive	3.58e-11
	25																																		TRINITY_DN2553_c0_g1_i1	250	NC_003627.1 Maize chlorotic mottle virus genomic RNA	4437	98.261	304	190	Negative	2.61e-52
	25																																		TRINITY_DN3469_c4_g1_i8	250	NC_003627.1 Maize chlorotic mottle virus genomic RNA	4437	98.611	573	644	Positive	4.49e-30
	25																																		TRINITY_DN5936_c0_g1_i1	247	NC_003627.1 Maize chlorotic mottle virus genomic RNA	4437	92.941	4117	4034	Negative	2.06e-28
	25																																		TRINITY_DN3914_c15_g1_i6	247	NC_003627.1 Maize chlorotic mottle virus genomic RNA	4437	98.077	1811	1760	Negative	5.81e-19
	25																																		TRINITY_DN9653_c0_g1_i1	246	NC_003627.1 Maize chlorotic mottle virus genomic RNA	4437	96.226	181	233	Positive	7.48e-18
	25																																		TRINITY_DN3417_c5_g1_i1	245	NC_003627.1 Maize chlorotic mottle virus genomic RNA	4437	92.308	3150	3213	Positive	5.76e-19
	25																																		TRINITY_DN10602_c0_g1_i1	244	NC_003627.1 Maize chlorotic mottle virus genomic RNA	4437	100	3389	3428	Positive	5.77e-14
	25																																		TRINITY_DN2022_c0_g2_i1	244	NC_003627.1 Maize chlorotic mottle virus genomic RNA	4437	96.825	1398	1460	Positive	2.05e-23
	25																																		TRINITY_DN419_c0_g1_i2	243	NC_003627.1 Maize chlorotic mottle virus genomic RNA	4437	96.241	16	148	Positive	2.51e-57
	25																																		TRINITY_DN6382_c0_g1_i1	243	NC_003627.1 Maize chlorotic mottle virus genomic RNA	4437	100	644	581	Negative	2.62e-27
	25																																		TRINITY_DN11645_c0_g1_i1	243	NC_003627.1 Maize chlorotic mottle virus genomic RNA	4437	97.917	1907	1954	Positive	9.55e-17
	25																																		TRINITY_DN3314_c0_g1_i1	242	NC_003627.1 Maize chlorotic mottle virus genomic RNA	4437	96.774	4308	4400	Positive	1.99e-38
	25																																		TRINITY_DN13343_c0_g1_i1	241	NC_003627.1 Maize chlorotic mottle virus genomic RNA	4437	94.872	4106	4068	Negative	4.43e-10
	25																																		TRINITY_DN8780_c0_g1_i1	241	NC_003627.1 Maize chlorotic mottle virus genomic RNA	4437	96.721	294	173	Negative	2.5e-52
	25																																		TRINITY_DN10825_c0_g1_i1	241	NC_003627.1 Maize chlorotic mottle virus genomic RNA	4437	100	136	164	Positive	7.42e-08
	25																																		TRINITY_DN7782_c0_g1_i1	241	NC_003627.1 Maize chlorotic mottle virus genomic RNA	4437	100	1027	966	Negative	3.36e-26
	25																																		TRINITY_DN1668_c0_g1_i1	240	NC_003627.1 Maize chlorotic mottle virus genomic RNA	4437	94.792	3210	3115	Negative	9.16e-37
	25																																		TRINITY_DN11589_c0_g1_i1	240	NC_003627.1 Maize chlorotic mottle virus genomic RNA	4437	93.478	878	922	Positive	9.49e-12
	25																																		TRINITY_DN3828_c10_g5_i1	239	NC_003627.1 Maize chlorotic mottle virus genomic RNA	4437	98.75	3412	3333	Negative	1.53e-34
	25																																		TRINITY_DN3536_c6_g1_i7	239	NC_003627.1 Maize chlorotic mottle virus genomic RNA	4437	100	3459	3495	Positive	2.63e-12
	25																																		TRINITY_DN1339_c0_g1_i1	239	NC_003627.1 Maize chlorotic mottle virus genomic RNA	4437	98.246	2435	2491	Positive	9.31e-22
	25																																		TRINITY_DN3610_c3_g4_i1	239	NC_003627.1 Maize chlorotic mottle virus genomic RNA	4437	95.876	4038	4134	Positive	5.45e-39
	25																																		TRINITY_DN3712_c10_g1_i1	238	NC_003627.1 Maize chlorotic mottle virus genomic RNA	4437	97.26	2145	2217	Positive	5.5e-29
	25																																		TRINITY_DN3502_c6_g2_i1	238	NC_003627.1 Maize chlorotic mottle virus genomic RNA	4437	100	4343	4409	Positive	5.5e-29
	25																																		TRINITY_DN7849_c0_g1_i1	238	NC_003627.1 Maize chlorotic mottle virus genomic RNA	4437	100	1781	1809	Positive	7.32e-08
	25																																		TRINITY_DN5532_c0_g1_i1	237	NC_003627.1 Maize chlorotic mottle virus genomic RNA	4437	89.831	511	453	Negative	1.55e-14
	25																																		TRINITY_DN3312_c2_g1_i1	237	NC_003627.1 Maize chlorotic mottle virus genomic RNA	4437	92.771	2247	2328	Positive	2.55e-27
	25																																		TRINITY_DN3312_c2_g1_i1	237	NC_003627.1 Maize chlorotic mottle virus genomic RNA	4437	94.737	648	612	Negative	5.63e-09
	25																																		TRINITY_DN6923_c0_g1_i1	237	NC_003627.1 Maize chlorotic mottle virus genomic RNA	4437	96.296	2405	2458	Positive	7.18e-18
	25																																		TRINITY_DN1268_c0_g1_i1	237	NC_003627.1 Maize chlorotic mottle virus genomic RNA	4437	94.783	2567	2681	Positive	1.15e-45
	25																																		TRINITY_DN717_c0_g1_i2	237	NC_003627.1 Maize chlorotic mottle virus genomic RNA	4437	97.561	2086	2046	Negative	7.23e-13
	25																																		TRINITY_DN9203_c0_g1_i1	236	NC_003627.1 Maize chlorotic mottle virus genomic RNA	4437	97.5	415	376	Negative	2.59e-12
	25																																		TRINITY_DN3861_c7_g7_i1	235	NC_003627.1 Maize chlorotic mottle virus genomic RNA	4437	96.386	4113	4195	Positive	6.97e-33
	25																																		TRINITY_DN15316_c1_g1_i1	233	NC_003627.1 Maize chlorotic mottle virus genomic RNA	4437	100	3456	3494	Positive	1.97e-13
	25																																		TRINITY_DN3549_c2_g1_i1	232	NC_003627.1 Maize chlorotic mottle virus genomic RNA	4437	96.809	309	402	Positive	5.27e-39
	25																																		TRINITY_DN4045_c0_g1_i1	232	NC_003627.1 Maize chlorotic mottle virus genomic RNA	4437	100	2440	2405	Negative	9.14e-12
	25																																		TRINITY_DN7279_c0_g1_i1	231	NC_003627.1 Maize chlorotic mottle virus genomic RNA	4437	97.143	647	614	Negative	5.47e-09
	25																																		TRINITY_DN9740_c0_g1_i1	230	NC_003627.1 Maize chlorotic mottle virus genomic RNA	4437	97.674	1357	1315	Negative	5.41e-14
	25																																		TRINITY_DN433_c0_g1_i1	229	NC_003627.1 Maize chlorotic mottle virus genomic RNA	4437	94.444	4164	4235	Positive	4.1e-25
	25																																		TRINITY_DN9569_c0_g1_i1	228	NC_003627.1 Maize chlorotic mottle virus genomic RNA	4437	96.154	2369	2420	Positive	2.47e-17
	25																																		TRINITY_DN7893_c0_g1_i1	228	NC_003627.1 Maize chlorotic mottle virus genomic RNA	4437	100	1010	978	Negative	4.17e-10
	25																																		TRINITY_DN9265_c0_g1_i1	226	NC_003627.1 Maize chlorotic mottle virus genomic RNA	4437	100	1762	1806	Positive	8.81e-17
	25																																		TRINITY_DN6843_c0_g1_i1	226	NC_003627.1 Maize chlorotic mottle virus genomic RNA	4437	97.5	376	415	Positive	2.47e-12
	25																																		TRINITY_DN12414_c0_g1_i1	225	NC_003627.1 Maize chlorotic mottle virus genomic RNA	4437	97.674	2009	2051	Positive	5.28e-14
	25																																		TRINITY_DN1058_c0_g1_i1	225	NC_003627.1 Maize chlorotic mottle virus genomic RNA	4437	97.959	1808	1760	Negative	2.44e-17
	25																																		TRINITY_DN687_c0_g1_i1	225	NC_003627.1 Maize chlorotic mottle virus genomic RNA	4437	96.429	1558	1641	Positive	1.85e-33
	25																																		TRINITY_DN16374_c0_g1_i1	224	NC_003627.1 Maize chlorotic mottle virus genomic RNA	4437	100	3232	3265	Positive	1.14e-10
	25																																		TRINITY_DN4566_c0_g1_i1	224	NC_003627.1 Maize chlorotic mottle virus genomic RNA	4437	95.238	2620	2579	Negative	8.79e-12
	25																																		TRINITY_DN13546_c0_g1_i1	223	NC_003627.1 Maize chlorotic mottle virus genomic RNA	4437	89.583	925	879	Negative	1.46e-09
	25																																		TRINITY_DN2098_c1_g1_i1	223	NC_003627.1 Maize chlorotic mottle virus genomic RNA	4437	96.341	1813	1732	Negative	2.36e-32
	25																																		TRINITY_DN2340_c0_g1_i2	222	NC_003627.1 Maize chlorotic mottle virus genomic RNA	4437	95.604	4416	4327	Negative	3.91e-35
	25																																		TRINITY_DN3463_c0_g3_i1	222	NC_003627.1 Maize chlorotic mottle virus genomic RNA	4437	97.561	870	910	Positive	6.73e-13
	25																																		TRINITY_DN15504_c0_g1_i1	222	NC_003627.1 Maize chlorotic mottle virus genomic RNA	4437	95.349	921	879	Negative	8.7e-12
	25																																		TRINITY_DN4633_c0_g1_i1	220	NC_003627.1 Maize chlorotic mottle virus genomic RNA	4437	91.489	1834	1880	Positive	3.1e-11
	25																																		TRINITY_DN3660_c6_g4_i1	220	NC_003627.1 Maize chlorotic mottle virus genomic RNA	4437	100	1556	1512	Negative	8.56e-17
	25																																		TRINITY_DN13580_c0_g1_i1	217	NC_003627.1 Maize chlorotic mottle virus genomic RNA	4437	97.674	573	532	Negative	1.82e-13
	25																																		TRINITY_DN3655_c4_g4_i1	217	NC_003627.1 Maize chlorotic mottle virus genomic RNA	4437	94.444	3647	3736	Positive	1.77e-33
	25																																		TRINITY_DN9790_c0_g1_i1	217	NC_003627.1 Maize chlorotic mottle virus genomic RNA	4437	97.059	1543	1510	Negative	1.84e-08
	25																																		TRINITY_DN6463_c0_g1_i2	215	NC_003627.1 Maize chlorotic mottle virus genomic RNA	4437	100	4198	4243	Positive	2.32e-17
	25																																		TRINITY_DN81_c0_g1_i1	214	NC_003627.1 Maize chlorotic mottle virus genomic RNA	4437	100	549	519	Negative	5.03e-09
	25																																		TRINITY_DN3312_c2_g1_i2	213	NC_003627.1 Maize chlorotic mottle virus genomic RNA	4437	92.771	2247	2328	Positive	2.26e-27
	25																																		TRINITY_DN6635_c0_g1_i1	212	NC_003627.1 Maize chlorotic mottle virus genomic RNA	4437	95.588	4345	4411	Positive	1.75e-23
	25																																		TRINITY_DN9103_c0_g1_i1	212	NC_003627.1 Maize chlorotic mottle virus genomic RNA	4437	95.833	1932	1861	Negative	8.09e-27
	25																																		TRINITY_DN3273_c0_g1_i2	212	NC_003627.1 Maize chlorotic mottle virus genomic RNA	4437	97.115	4235	4338	Positive	1.32e-44
	25																																		TRINITY_DN3877_c9_g2_i3	208	NC_003627.1 Maize chlorotic mottle virus genomic RNA	4437	96.226	1811	1760	Negative	2.23e-17
	25																																		TRINITY_DN3711_c51_g2_i1	208	NC_003627.1 Maize chlorotic mottle virus genomic RNA	4437	97.333	4155	4081	Negative	3.66e-30
	25																																		TRINITY_DN5175_c0_g1_i1	208	NC_003627.1 Maize chlorotic mottle virus genomic RNA	4437	100	645	618	Negative	2.27e-07
	25																																		TRINITY_DN3840_c2_g1_i2	207	NC_003627.1 Maize chlorotic mottle virus genomic RNA	4437	94.017	2687	2803	Positive	1.28e-44
	25																																		TRINITY_DN1000_c0_g1_i2	206	NC_003627.1 Maize chlorotic mottle virus genomic RNA	4437	96.04	1961	1861	Negative	2.76e-41
	25																																		TRINITY_DN3711_c51_g1_i15	204	NC_003627.1 Maize chlorotic mottle virus genomic RNA	4437	95.385	321	193	Negative	1.61e-53
	25																																		TRINITY_DN419_c0_g1_i1	203	NC_003627.1 Maize chlorotic mottle virus genomic RNA	4437	96.97	16	114	Positive	7.55e-42
	25																																		TRINITY_DN3681_c5_g1_i1	203	NC_003627.1 Maize chlorotic mottle virus genomic RNA	4437	97.143	2693	2797	Positive	3.49e-45
	25																																		TRINITY_DN14956_c0_g2_i1	203	NC_003627.1 Maize chlorotic mottle virus genomic RNA	4437	95.89	842	914	Positive	2.14e-27
	25																																		TRINITY_DN2022_c0_g1_i1	203	NC_003627.1 Maize chlorotic mottle virus genomic RNA	4437	96.61	1398	1456	Positive	2.79e-21
	25																																		TRINITY_DN3711_c51_g1_i9	202	NC_003627.1 Maize chlorotic mottle virus genomic RNA	4437	96.739	3237	3146	Negative	5.84e-38
	25																																		TRINITY_DN3877_c7_g1_i1	201	NC_003627.1 Maize chlorotic mottle virus genomic RNA	4437	94.444	2643	2572	Negative	3.55e-25
	25																																		TRINITY_DN3807_c5_g2_i8	201	NC_003627.1 Maize chlorotic mottle virus genomic RNA	4437	96.078	334	284	Negative	7.73e-17
Researcher	Sample	Host	Total	Total	Unique_Contigs	Total	Contigs	Maize yellow dwarf virus-RMV2									Sugarcane mosaic virus									Maize streak virus									Maize Chlorotic mottle virus-RMV2									NC_018833.1_Iranian johnsongrass mosaic virus	NC_018833.1 Iranian johnsongrass mosaic virus
		Maize Leaf	Sequences	Contigs	matching to Virus	virus	Unmatch_to _PVGDB/NCBI	Contig	Contig	Reference	Reference	%	Coordinates		Polarity	E	Contig	Conting	Reference	Reference	%	Coordinates		Polarity	E	Conting	Conting	Reference	Reference	%	Coordinates		Polarity	E	Conting	Conting	Reference	Reference	%	Coordinates		Polarity	E	Conting	Conting	Reference	Reference	%	Coordinates
	26		796315	29574	462	6	5329		Length		Length	identity	Start	End		value		Length		Length	identity	Start	End		value		Length		Length	identity	Start	End		value		Length		Length	identity	Start	End		value		Length		Length	identity	Start
	26							TRINITY_DN10717_c0_g1_i1	321	NC_029990.1 Maize yellow dwarf virus-RMV2	5625	98.75	2240	2559	Positive	8.14e-163	TRINITY_DN4332_c0_g1_i1	302	NC_003398.1 Sugarcane mosaic virus	9596	93.377	8974	9275	Positive	3.72e-126	TRINITY_DN3222_c6_g3_i16	1603	NC_001346.2 Maize streak virus - A[Ama]	2689	97.701	1173	1087	Negative	6.63e-36	TRINITY_DN3189_c0_g1_i1	3088	NC_003627.1 Maize chlorotic mottle virus genomic RNA	4437	96.796	1446	4410	Positive	0	TRINITY_DN11185_c0_g1_i1	243	NC_018833.1 Iranian johnsongrass mosaic virus	9544	78.022	8759
	26							TRINITY_DN10847_c0_g1_i1	234	NC_029990.1 Maize yellow dwarf virus-RMV2	5625	99.145	1903	2136	Positive	1.71e-118	TRINITY_DN13924_c0_g1_i1	277	NC_003398.1 Sugarcane mosaic virus	9596	90.614	2851	2575	Negative	2.72e-102	TRINITY_DN3178_c31_g2_i4	1190	NC_001346.2 Maize streak virus - A[Ama]	2689	98.403	2103	914	Negative	0	TRINITY_DN3189_c0_g2_i1	1458	NC_003627.1 Maize chlorotic mottle virus genomic RNA	4437	96.502	1470	13	Negative	0
	26							TRINITY_DN11085_c0_g1_i1	449	NC_029990.1 Maize yellow dwarf virus-RMV2	5625	97.773	1292	1740	Positive	0	TRINITY_DN4691_c0_g1_i1	267	NC_003398.1 Sugarcane mosaic virus	9596	91.321	1167	1431	Positive	1.21e-100	TRINITY_DN3178_c31_g1_i7	1190	NC_001346.2 Maize streak virus - A[Ama]	2689	98.765	648	1	Negative	0	TRINITY_DN3189_c0_g1_i2	469	NC_003627.1 Maize chlorotic mottle virus genomic RNA	4437	97.608	1446	1863	Positive	0
	26							TRINITY_DN11753_c0_g1_i1	398	NC_029990.1 Maize yellow dwarf virus-RMV2	5625	97.99	2792	3189	Positive	0										TRINITY_DN3178_c31_g2_i3	1153	NC_001346.2 Maize streak virus - A[Ama]	2689	98.767	1967	914	Negative	0	TRINITY_DN3275_c4_g2_i1	358	NC_003627.1 Maize chlorotic mottle virus genomic RNA	4437	93.333	879	923	Positive	1.89e-10
	26							TRINITY_DN3370_c6_g2_i11	399	NC_029990.1 Maize yellow dwarf virus-RMV2	5625	97	2566	2468	Negative	1.57e-41										TRINITY_DN3178_c31_g2_i2	1149	NC_001346.2 Maize streak virus - A[Ama]	2689	99.034	1948	914	Negative	0	TRINITY_DN3189_c0_g2_i2	208	NC_003627.1 Maize chlorotic mottle virus genomic RNA	4437	100	630	521	Negative	5.91e-53
	26							TRINITY_DN5573_c0_g1_i1	280	NC_029990.1 Maize yellow dwarf virus-RMV2	5625	97.482	3574	3297	Negative	1.57e-134										TRINITY_DN3334_c8_g2_i4	1148	NC_001346.2 Maize streak virus - A[Ama]	2689	95.181	2512	2430	Negative	1.71e-30
	26							TRINITY_DN6156_c0_g1_i1	253	NC_029990.1 Maize yellow dwarf virus-RMV2	5625	98.413	2532	2783	Positive	3.97e-125										TRINITY_DN3178_c31_g1_i1	1141	NC_001346.2 Maize streak virus - A[Ama]	2689	99.245	530	1	Negative	0
	26							TRINITY_DN6905_c0_g1_i1	262	NC_029990.1 Maize yellow dwarf virus-RMV2	5625	98.855	411	672	Positive	2.45e-132										TRINITY_DN3178_c31_g1_i4	1036	NC_001346.2 Maize streak virus - A[Ama]	2689	96.14	2689	2146	Negative	0
	26							TRINITY_DN7379_c0_g1_i1	394	NC_029990.1 Maize yellow dwarf virus-RMV2	5625	94.416	5210	4817	Negative	7.71e-174										TRINITY_DN3321_c0_g1_i2	982	NC_001346.2 Maize streak virus - A[Ama]	2689	100	958	896	Negative	4.08e-26
	26							TRINITY_DN8990_c0_g1_i1	416	NC_029990.1 Maize yellow dwarf virus-RMV2	5625	95.169	4308	4721	Positive	0										TRINITY_DN3178_c31_g2_i6	979	NC_001346.2 Maize streak virus - A[Ama]	2689	97.914	2092	1134	Negative	0
	26																									TRINITY_DN3178_c31_g2_i1	967	NC_001346.2 Maize streak virus - A[Ama]	2689	99.161	1747	914	Negative	0
	26																									TRINITY_DN3178_c31_g2_i5	950	NC_001346.2 Maize streak virus - A[Ama]	2689	99.053	1758	914	Negative	0
	26																									TRINITY_DN3416_c4_g1_i2	876	NC_001346.2 Maize streak virus - A[Ama]	2689	95.798	584	466	Negative	5.87e-49
	26																									TRINITY_DN3186_c5_g1_i27	819	NC_001346.2 Maize streak virus - A[Ama]	2689	97.753	2437	2525	Positive	2.58e-37
	26																									TRINITY_DN3153_c5_g14_i1	772	NC_001346.2 Maize streak virus - A[Ama]	2689	100	283	243	Negative	5.41e-14
	26																									TRINITY_DN3170_c11_g1_i7	756	NC_001346.2 Maize streak virus - A[Ama]	2689	96.786	1569	1292	Negative	9.68e-131
	26																									TRINITY_DN3411_c5_g1_i3	754	NC_001346.2 Maize streak virus - A[Ama]	2689	100	1296	1338	Positive	4.09e-15
	26																									TRINITY_DN3384_c6_g2_i14	747	NC_001346.2 Maize streak virus - A[Ama]	2689	98.667	1099	1025	Negative	1.1e-30
	26																									TRINITY_DN3235_c5_g3_i15	688	NC_001346.2 Maize streak virus - A[Ama]	2689	88.889	292	213	Negative	3.69e-20
	26																									TRINITY_DN3403_c2_g1_i10	673	NC_001346.2 Maize streak virus - A[Ama]	2689	98.23	1150	1038	Negative	3.46e-50
	26																									TRINITY_DN3324_c5_g2_i4	655	NC_001346.2 Maize streak virus - A[Ama]	2689	98.305	1327	1269	Negative	2.1e-22
	26																									TRINITY_DN3422_c10_g1_i40	650	NC_001346.2 Maize streak virus - A[Ama]	2689	97.826	479	570	Positive	4.38e-39
	26																									TRINITY_DN3097_c1_g2_i1	634	NC_001346.2 Maize streak virus - A[Ama]	2689	100	876	825	Negative	3.39e-20
	26																									TRINITY_DN929_c0_g1_i2	632	NC_001346.2 Maize streak virus - A[Ama]	2689	96	1787	1861	Positive	5.58e-28
	26																									TRINITY_DN7884_c0_g1_i1	629	NC_001346.2 Maize streak virus - A[Ama]	2689	94.845	2525	2429	Negative	7.08e-37
	26																									TRINITY_DN3287_c6_g2_i8	628	NC_001346.2 Maize streak virus - A[Ama]	2689	100	170	137	Negative	3.4e-10
	26																									TRINITY_DN3242_c7_g1_i4	585	NC_001346.2 Maize streak virus - A[Ama]	2689	100	895	831	Negative	1.85e-27
	26																									TRINITY_DN3315_c5_g1_i18	576	NC_001346.2 Maize streak virus - A[Ama]	2689	98.889	1840	1751	Negative	1.07e-39
	26																									TRINITY_DN3221_c6_g1_i1	574	NC_001346.2 Maize streak virus - A[Ama]	2689	97.727	76	119	Positive	3.98e-14
	26																									TRINITY_DN3401_c7_g5_i3	563	NC_001346.2 Maize streak virus - A[Ama]	2689	100	1223	1131	Negative	4.84e-43
	26																									TRINITY_DN3382_c2_g1_i1	555	NC_001346.2 Maize streak virus - A[Ama]	2689	95.041	121	2	Negative	4.73e-48
	26																									TRINITY_DN12985_c0_g1_i1	549	NC_001346.2 Maize streak virus - A[Ama]	2689	97.701	1216	1302	Positive	2.21e-36
	26																									TRINITY_DN3304_c11_g2_i1	537	NC_001346.2 Maize streak virus - A[Ama]	2689	100	1245	1303	Positive	3.66e-24
	26																									TRINITY_DN90_c0_g2_i1	536	NC_001346.2 Maize streak virus - A[Ama]	2689	94.318	2396	2483	Positive	2.17e-31
	26																									TRINITY_DN3363_c3_g2_i11	532	NC_001346.2 Maize streak virus - A[Ama]	2689	96.471	2430	2514	Positive	4.63e-33
	26																									TRINITY_DN3285_c7_g7_i2	531	NC_001346.2 Maize streak virus - A[Ama]	2689	96.721	402	462	Positive	6.06e-22
	26																									TRINITY_DN3276_c7_g2_i10	527	NC_001346.2 Maize streak virus - A[Ama]	2689	98.551	1843	1775	Negative	4.61e-28
	26																									TRINITY_DN3299_c2_g1_i1	526	NC_001346.2 Maize streak virus - A[Ama]	2689	97.03	1758	1658	Negative	1.62e-42
	26																									TRINITY_DN3166_c11_g2_i1	507	NC_001346.2 Maize streak virus - A[Ama]	2689	97.436	1664	1626	Negative	2.11e-11
	26																									TRINITY_DN3178_c31_g1_i6	507	NC_001346.2 Maize streak virus - A[Ama]	2689	95.588	306	103	Negative	3.15e-89
	26																									TRINITY_DN3289_c6_g4_i1	500	NC_001346.2 Maize streak virus - A[Ama]	2689	98.592	1279	1349	Positive	3.38e-29
	26																									TRINITY_DN3292_c9_g1_i9	497	NC_001346.2 Maize streak virus - A[Ama]	2689	98.077	1296	1347	Positive	1.22e-18
	26																									TRINITY_DN3317_c6_g1_i2	484	NC_001346.2 Maize streak virus - A[Ama]	2689	99.115	1766	1878	Positive	1.47e-52
	26																									TRINITY_DN3136_c9_g2_i12	483	NC_001346.2 Maize streak virus - A[Ama]	2689	100	1309	1280	Negative	4.33e-08
	26																									TRINITY_DN3392_c11_g1_i7	479	NC_001346.2 Maize streak virus - A[Ama]	2689	100	1297	1329	Positive	9.23e-10
	26																									TRINITY_DN2286_c0_g1_i1	478	NC_001346.2 Maize streak virus - A[Ama]	2689	100	1841	1814	Negative	5.54e-07
	26																									TRINITY_DN170_c0_g1_i1	472	NC_001346.2 Maize streak virus - A[Ama]	2689	98.81	1528	1611	Positive	1.89e-36
	26																									TRINITY_DN12948_c0_g1_i1	465	NC_001346.2 Maize streak virus - A[Ama]	2689	98.571	473	542	Positive	1.13e-28
	26																									TRINITY_DN3408_c5_g2_i1	458	NC_001346.2 Maize streak virus - A[Ama]	2689	100	1282	1318	Positive	5.26e-12
	26																									TRINITY_DN3175_c12_g1_i9	457	NC_001346.2 Maize streak virus - A[Ama]	2689	98.571	1551	1482	Negative	1.1e-28
	26																									TRINITY_DN3170_c11_g1_i2	455	NC_001346.2 Maize streak virus - A[Ama]	2689	98.824	1546	1292	Negative	3.43e-128
	26																									TRINITY_DN2987_c0_g1_i6	452	NC_001346.2 Maize streak virus - A[Ama]	2689	92.188	2606	2669	Positive	3.98e-18
	26																									TRINITY_DN2929_c0_g1_i2	448	NC_001346.2 Maize streak virus - A[Ama]	2689	97.872	2522	2429	Negative	2.29e-40
	26																									TRINITY_DN8005_c0_g1_i1	446	NC_001346.2 Maize streak virus - A[Ama]	2689	100	279	213	Negative	1.08e-28
	26																									TRINITY_DN3252_c10_g1_i3	444	NC_001346.2 Maize streak virus - A[Ama]	2689	96.694	2507	2387	Negative	4.81e-52
	26																									TRINITY_DN3432_c12_g2_i14	441	NC_001346.2 Maize streak virus - A[Ama]	2689	96.078	1553	1452	Negative	6.27e-41
	26																									TRINITY_DN3144_c1_g1_i2	436	NC_001346.2 Maize streak virus - A[Ama]	2689	92.754	2676	2608	Negative	6.37e-21
	26																									TRINITY_DN3124_c5_g9_i1	435	NC_001346.2 Maize streak virus - A[Ama]	2689	98.333	1355	1296	Negative	3.8e-23
	26																									TRINITY_DN3408_c5_g1_i10	431	NC_001346.2 Maize streak virus - A[Ama]	2689	100	19	51	Positive	8.28e-10
	26																									TRINITY_DN2637_c0_g1_i4	431	NC_001346.2 Maize streak virus - A[Ama]	2689	92.857	264	209	Negative	6.36e-16
	26																									TRINITY_DN1548_c0_g1_i2	430	NC_001346.2 Maize streak virus - A[Ama]	2689	100	192	300	Positive	4.66e-52
	26																									TRINITY_DN3189_c0_g4_i1	429	NC_001346.2 Maize streak virus - A[Ama]	2689	94.366	1580	1650	Positive	2.9e-24
	26																									TRINITY_DN2767_c0_g1_i1	422	NC_001346.2 Maize streak virus - A[Ama]	2689	98	1366	1465	Positive	9.97e-44
	26																									TRINITY_DN3097_c3_g1_i5	420	NC_001346.2 Maize streak virus - A[Ama]	2689	98.361	185	245	Positive	3.67e-23
	26																									TRINITY_DN2967_c0_g1_i1	419	NC_001346.2 Maize streak virus - A[Ama]	2689	94.845	745	841	Positive	1.67e-36
	26																									TRINITY_DN3195_c6_g3_i3	417	NC_001346.2 Maize streak virus - A[Ama]	2689	96.703	2430	2520	Positive	4.61e-37
	26																									TRINITY_DN3325_c2_g1_i1	416	NC_001346.2 Maize streak virus - A[Ama]	2689	98.571	1480	1411	Negative	1e-28
	26																									TRINITY_DN3260_c5_g1_i1	416	NC_001346.2 Maize streak virus - A[Ama]	2689	100	837	809	Negative	1.33e-07
	26																									TRINITY_DN3175_c12_g1_i6	415	NC_001346.2 Maize streak virus - A[Ama]	2689	98.611	1599	1528	Negative	7.73e-30
	26																									TRINITY_DN3317_c6_g1_i6	412	NC_001346.2 Maize streak virus - A[Ama]	2689	97.436	1766	1843	Positive	1.65e-31
	26																									TRINITY_DN3201_c7_g2_i1	409	NC_001346.2 Maize streak virus - A[Ama]	2689	97.917	718	813	Positive	1.61e-41
	26																									TRINITY_DN3258_c2_g1_i2	406	NC_001346.2 Maize streak virus - A[Ama]	2689	97.222	2419	2526	Positive	1.59e-46
	26																									TRINITY_DN3331_c3_g5_i6	405	NC_001346.2 Maize streak virus - A[Ama]	2689	95	1270	1347	Positive	9.75e-29
	26																									TRINITY_DN3317_c6_g1_i1	404	NC_001346.2 Maize streak virus - A[Ama]	2689	100	1766	1837	Positive	1.62e-31
	26																									TRINITY_DN3039_c0_g1_i1	402	NC_001346.2 Maize streak virus - A[Ama]	2689	100	1162	1192	Positive	9.95e-09
	26																									TRINITY_DN3215_c5_g6_i2	402	NC_001346.2 Maize streak virus - A[Ama]	2689	97.656	2321	2448	Positive	1.2e-57
	26																									TRINITY_DN3317_c6_g1_i3	392	NC_001346.2 Maize streak virus - A[Ama]	2689	99.099	1768	1878	Positive	1.52e-51
	26																									TRINITY_DN2796_c1_g1_i1	391	NC_001346.2 Maize streak virus - A[Ama]	2689	100	1282	1336	Positive	4.4e-22
	26																									TRINITY_DN3355_c6_g7_i1	386	NC_001346.2 Maize streak virus - A[Ama]	2689	98.718	2448	2525	Positive	3.31e-33
	26																									TRINITY_DN3260_c5_g1_i3	385	NC_001346.2 Maize streak virus - A[Ama]	2689	98.276	866	809	Negative	4.33e-22
	26																									TRINITY_DN1644_c0_g1_i1	376	NC_001346.2 Maize streak virus - A[Ama]	2689	97.917	2430	2525	Positive	1.48e-41
	26																									TRINITY_DN2600_c0_g1_i1	374	NC_001346.2 Maize streak virus - A[Ama]	2689	98.837	2433	2518	Positive	1.14e-37
	26																									TRINITY_DN3170_c11_g1_i4	371	NC_001346.2 Maize streak virus - A[Ama]	2689	98.294	1584	1292	Negative	4.51e-146
	26																									TRINITY_DN3382_c2_g1_i2	370	NC_001346.2 Maize streak virus - A[Ama]	2689	95.868	121	1	Negative	1.85e-50
	26																									TRINITY_DN3345_c7_g1_i5	369	NC_001346.2 Maize streak virus - A[Ama]	2689	93.043	2134	2020	Negative	1.45e-41
	26																									TRINITY_DN587_c0_g1_i1	367	NC_001346.2 Maize streak virus - A[Ama]	2689	100	861	791	Negative	5.25e-31
	26																									TRINITY_DN2683_c0_g2_i2	367	NC_001346.2 Maize streak virus - A[Ama]	2689	95.604	163	252	Positive	6.74e-35
	26																									TRINITY_DN8517_c0_g1_i2	360	NC_001346.2 Maize streak virus - A[Ama]	2689	97.436	2486	2563	Positive	1.43e-31
	26																									TRINITY_DN3240_c8_g1_i7	360	NC_001346.2 Maize streak virus - A[Ama]	2689	93.939	2568	2405	Negative	4.89e-66
	26																									TRINITY_DN11076_c0_g1_i1	359	NC_001346.2 Maize streak virus - A[Ama]	2689	100	1305	1338	Positive	1.9e-10
	26																									TRINITY_DN6944_c0_g1_i1	357	NC_001346.2 Maize streak virus - A[Ama]	2689	100	1841	1801	Negative	2.42e-14
	26																									TRINITY_DN3178_c31_g9_i1	353	NC_001346.2 Maize streak virus - A[Ama]	2689	96.491	2061	2117	Positive	6.61e-20
	26																									TRINITY_DN3420_c4_g3_i2	350	NC_001346.2 Maize streak virus - A[Ama]	2689	100	1866	1812	Negative	3.91e-22
	26																									TRINITY_DN3387_c2_g3_i6	349	NC_001346.2 Maize streak virus - A[Ama]	2689	100	1275	1326	Positive	1.81e-20
	26																									TRINITY_DN3165_c2_g1_i8	346	NC_001346.2 Maize streak virus - A[Ama]	2689	100	661	586	Negative	8.19e-34
	26																									TRINITY_DN906_c0_g1_i1	345	NC_001346.2 Maize streak virus - A[Ama]	2689	95.96	2528	2430	Negative	6.27e-40
	26																									TRINITY_DN3170_c10_g2_i1	345	NC_001346.2 Maize streak virus - A[Ama]	2689	97.5	1638	1559	Negative	1.06e-32
	26																									TRINITY_DN6219_c0_g1_i1	344	NC_001346.2 Maize streak virus - A[Ama]	2689	98.765	1137	1057	Negative	6.29e-35
	26																									TRINITY_DN3126_c6_g3_i4	343	NC_001346.2 Maize streak virus - A[Ama]	2689	96.364	1532	1586	Positive	8.29e-19
	26																									TRINITY_DN3370_c1_g1_i1	341	NC_001346.2 Maize streak virus - A[Ama]	2689	100	1339	1279	Negative	1.76e-25
	26																									TRINITY_DN3392_c10_g1_i1	340	NC_001346.2 Maize streak virus - A[Ama]	2689	100	300	120	Negative	3.44e-92
	26																									TRINITY_DN3364_c5_g1_i39	339	NC_001346.2 Maize streak virus - A[Ama]	2689	96.97	2511	2413	Negative	1.32e-41
	26																									TRINITY_DN3240_c8_g2_i1	335	NC_001346.2 Maize streak virus - A[Ama]	2689	96.61	2463	2405	Negative	4.83e-21
	26																									TRINITY_DN3178_c31_g8_i2	333	NC_001346.2 Maize streak virus - A[Ama]	2689	98.282	648	938	Positive	5.2e-145
	26																									TRINITY_DN2510_c0_g1_i1	332	NC_001346.2 Maize streak virus - A[Ama]	2689	98.039	1204	1305	Positive	5.97e-45
	26																									TRINITY_DN3166_c10_g1_i1	329	NC_001346.2 Maize streak virus - A[Ama]	2689	96	1322	1273	Negative	4.77e-16
	26																									TRINITY_DN3222_c4_g1_i3	329	NC_001346.2 Maize streak virus - A[Ama]	2689	95.918	2429	2526	Positive	7.71e-39
	26																									TRINITY_DN3324_c5_g5_i1	327	NC_001346.2 Maize streak virus - A[Ama]	2689	97.959	1317	1269	Negative	3.66e-17
	26																									TRINITY_DN3170_c11_g1_i10	326	NC_001346.2 Maize streak virus - A[Ama]	2689	98.995	1490	1292	Negative	7.01e-99
	26																									TRINITY_DN9762_c0_g1_i1	326	NC_001346.2 Maize streak virus - A[Ama]	2689	97.917	2524	2429	Negative	1.27e-41
	26																									TRINITY_DN3431_c7_g1_i1	324	NC_001346.2 Maize streak virus - A[Ama]	2689	99.138	991	1106	Positive	2.06e-54
	26																									TRINITY_DN9257_c0_g1_i1	323	NC_001346.2 Maize streak virus - A[Ama]	2689	97.895	2430	2524	Positive	4.52e-41
	26																									TRINITY_DN3345_c7_g1_i4	322	NC_001346.2 Maize streak virus - A[Ama]	2689	92.754	2136	2000	Negative	4.44e-51
	26																									TRINITY_DN2832_c0_g1_i3	322	NC_001346.2 Maize streak virus - A[Ama]	2689	100	451	403	Negative	7.75e-19
	26																									TRINITY_DN263_c0_g1_i1	322	NC_001346.2 Maize streak virus - A[Ama]	2689	97.222	417	382	Negative	6.07e-10
	26																									TRINITY_DN3274_c5_g1_i4	322	NC_001346.2 Maize streak virus - A[Ama]	2689	98.261	1189	1302	Positive	1.23e-51
	26																									TRINITY_DN2768_c0_g1_i3	321	NC_001346.2 Maize streak virus - A[Ama]	2689	97.674	1550	1508	Negative	7.78e-14
	26																									TRINITY_DN9005_c0_g1_i1	321	NC_001346.2 Maize streak virus - A[Ama]	2689	100	1122	1074	Negative	7.72e-19
	26																									TRINITY_DN3317_c6_g1_i5	320	NC_001346.2 Maize streak virus - A[Ama]	2689	97.368	1768	1843	Positive	1.63e-30
	26																									TRINITY_DN3642_c0_g1_i1	320	NC_001346.2 Maize streak virus - A[Ama]	2689	100	2487	2517	Positive	7.8e-09
	26																									TRINITY_DN6545_c0_g1_i1	318	NC_001346.2 Maize streak virus - A[Ama]	2689	100	1201	1317	Positive	1.21e-56
	26																									TRINITY_DN3182_c2_g1_i2	317	NC_001346.2 Maize streak virus - A[Ama]	2689	91.429	2496	2600	Positive	2.07e-34
	26																									TRINITY_DN12754_c0_g1_i1	316	NC_001346.2 Maize streak virus - A[Ama]	2689	97.059	1441	1474	Positive	7.7e-09
	26																									TRINITY_DN4150_c0_g1_i1	316	NC_001346.2 Maize streak virus - A[Ama]	2689	90.909	849	806	Negative	2.14e-09
	26																									TRINITY_DN3178_c31_g8_i1	315	NC_001346.2 Maize streak virus - A[Ama]	2689	99.048	624	938	Positive	1.03e-161
	26																									TRINITY_DN3345_c6_g1_i4	314	NC_001346.2 Maize streak virus - A[Ama]	2689	94.444	1820	1909	Positive	9.55e-33
	26																									TRINITY_DN2907_c0_g1_i1	314	NC_001346.2 Maize streak virus - A[Ama]	2689	100	212	176	Negative	3.53e-12
	26																									TRINITY_DN3334_c8_g10_i2	312	NC_001346.2 Maize streak virus - A[Ama]	2689	98.387	1592	1469	Negative	3.29e-57
	26																									TRINITY_DN3317_c6_g1_i4	312	NC_001346.2 Maize streak virus - A[Ama]	2689	100	1768	1837	Positive	1.59e-30
	26																									TRINITY_DN9624_c0_g1_i1	310	NC_001346.2 Maize streak virus - A[Ama]	2689	100	1314	1286	Negative	9.76e-08
	26																									TRINITY_DN10007_c0_g1_i1	310	NC_001346.2 Maize streak virus - A[Ama]	2689	95.789	2523	2429	Negative	3.36e-37
	26																									TRINITY_DN3273_c7_g6_i3	310	NC_001346.2 Maize streak virus - A[Ama]	2689	92.857	2527	2430	Negative	2.02e-34
	26																									TRINITY_DN5815_c0_g1_i1	309	NC_001346.2 Maize streak virus - A[Ama]	2689	96.809	571	664	Positive	7.2e-39
	26																									TRINITY_DN8245_c0_g1_i1	309	NC_001346.2 Maize streak virus - A[Ama]	2689	100	1287	1317	Positive	7.52e-09
	26																									TRINITY_DN3398_c9_g2_i2	308	NC_001346.2 Maize streak virus - A[Ama]	2689	100	1106	1037	Negative	1.57e-30
	26																									TRINITY_DN2371_c0_g1_i1	308	NC_001346.2 Maize streak virus - A[Ama]	2689	97.895	2433	2527	Positive	4.29e-41
	26																									TRINITY_DN3178_c31_g7_i1	308	NC_001346.2 Maize streak virus - A[Ama]	2689	98.058	103	1	Negative	1.53e-45
	26																									TRINITY_DN3224_c2_g8_i1	308	NC_001346.2 Maize streak virus - A[Ama]	2689	98.765	2444	2524	Positive	5.59e-35
	26																									TRINITY_DN5674_c0_g1_i1	307	NC_001346.2 Maize streak virus - A[Ama]	2689	87.931	1338	1282	Negative	1.6e-10
	26																									TRINITY_DN9427_c0_g1_i1	307	NC_001346.2 Maize streak virus - A[Ama]	2689	94.656	396	525	Positive	3.26e-52
	26																									TRINITY_DN3417_c7_g3_i6	307	NC_001346.2 Maize streak virus - A[Ama]	2689	97.647	412	328	Negative	1.55e-35
	26																									TRINITY_DN3096_c11_g1_i2	306	NC_001346.2 Maize streak virus - A[Ama]	2689	98.507	1252	1318	Positive	3.36e-27
	26																									TRINITY_DN2630_c1_g1_i3	306	NC_001346.2 Maize streak virus - A[Ama]	2689	100	2435	2465	Positive	7.44e-09
	26																									TRINITY_DN2368_c0_g1_i2	305	NC_001346.2 Maize streak virus - A[Ama]	2689	96.875	2414	2477	Positive	7.26e-24
	26																									TRINITY_DN3408_c3_g4_i1	305	NC_001346.2 Maize streak virus - A[Ama]	2689	100	1823	1864	Positive	5.69e-15
	26																									TRINITY_DN3345_c7_g3_i3	304	NC_001346.2 Maize streak virus - A[Ama]	2689	94.815	519	385	Negative	1.93e-54
	26																									TRINITY_DN7637_c0_g1_i1	303	NC_001346.2 Maize streak virus - A[Ama]	2689	96.471	1759	1675	Negative	7.1e-34
	26																									TRINITY_DN2804_c1_g1_i1	303	NC_001346.2 Maize streak virus - A[Ama]	2689	100	2639	2674	Positive	1.22e-11
	26																									TRINITY_DN1022_c0_g1_i1	303	NC_001346.2 Maize streak virus - A[Ama]	2689	100	520	431	Negative	1.17e-41
	26																									TRINITY_DN2468_c0_g1_i1	302	NC_001346.2 Maize streak virus - A[Ama]	2689	99.107	1228	1339	Positive	3.2e-52
	26																									TRINITY_DN3140_c8_g1_i1	302	NC_001346.2 Maize streak virus - A[Ama]	2689	100	149	85	Negative	9.22e-28
	26																									TRINITY_DN10834_c0_g1_i1	301	NC_001346.2 Maize streak virus - A[Ama]	2689	99.2	327	451	Positive	1.89e-59
	26																									TRINITY_DN13389_c0_g1_i1	300	NC_001346.2 Maize streak virus - A[Ama]	2689	95.556	2355	2311	Negative	2.6e-13
	26																									TRINITY_DN9665_c0_g1_i2	300	NC_001346.2 Maize streak virus - A[Ama]	2689	100	1750	1831	Positive	3.25e-37
	26																									TRINITY_DN3260_c5_g1_i2	300	NC_001346.2 Maize streak virus - A[Ama]	2689	98	908	809	Negative	6.93e-44
	26																									TRINITY_DN3392_c10_g1_i2	299	NC_001346.2 Maize streak virus - A[Ama]	2689	100	256	120	Negative	8.62e-68
	26																									TRINITY_DN4221_c0_g1_i1	296	NC_001346.2 Maize streak virus - A[Ama]	2689	97.619	1506	1547	Positive	2.56e-13
	26																									TRINITY_DN3370_c3_g1_i1	295	NC_001346.2 Maize streak virus - A[Ama]	2689	95.833	1437	1484	Positive	5.49e-15
	26																									TRINITY_DN7641_c0_g1_i1	294	NC_001346.2 Maize streak virus - A[Ama]	2689	97.333	2251	2177	Negative	5.35e-30
	26																									TRINITY_DN12621_c0_g1_i2	294	NC_001346.2 Maize streak virus - A[Ama]	2689	100	817	849	Positive	5.51e-10
	26																									TRINITY_DN2899_c1_g1_i2	293	NC_001346.2 Maize streak virus - A[Ama]	2689	98.718	1318	1241	Negative	2.46e-33
	26																									TRINITY_DN3408_c5_g5_i1	292	NC_001346.2 Maize streak virus - A[Ama]	2689	97.727	405	448	Positive	1.95e-14
	26																									TRINITY_DN2557_c0_g1_i1	290	NC_001346.2 Maize streak virus - A[Ama]	2689	100	2494	2525	Positive	1.95e-09
	26																									TRINITY_DN3190_c1_g1_i1	290	NC_001346.2 Maize streak virus - A[Ama]	2689	100	1190	1151	Negative	6.97e-14
	26																									TRINITY_DN8066_c0_g1_i1	290	NC_001346.2 Maize streak virus - A[Ama]	2689	100	1173	1210	Positive	9.02e-13
	26																									TRINITY_DN6197_c0_g1_i1	287	NC_001346.2 Maize streak virus - A[Ama]	2689	96.552	2516	2430	Negative	5.18e-35
	26																									TRINITY_DN3415_c4_g2_i19	287	NC_001346.2 Maize streak virus - A[Ama]	2689	97.917	1296	1343	Positive	1.15e-16
	26																									TRINITY_DN3273_c11_g1_i1	287	NC_001346.2 Maize streak virus - A[Ama]	2689	97.297	1754	1682	Negative	6.75e-29
	26																									TRINITY_DN4563_c0_g1_i1	286	NC_001346.2 Maize streak virus - A[Ama]	2689	100	444	507	Positive	3.13e-27
	26																									TRINITY_DN9126_c0_g1_i1	284	NC_001346.2 Maize streak virus - A[Ama]	2689	96.296	1497	1630	Positive	8.27e-58
	26																									TRINITY_DN3178_c31_g1_i3	284	NC_001346.2 Maize streak virus - A[Ama]	2689	100	290	181	Negative	8.33e-53
	26																									TRINITY_DN6669_c0_g1_i1	283	NC_001346.2 Maize streak virus - A[Ama]	2689	100	2521	2494	Negative	3.18e-07
	26																									TRINITY_DN1546_c0_g1_i1	283	NC_001346.2 Maize streak virus - A[Ama]	2689	97.015	2478	2544	Positive	1.44e-25
	26																									TRINITY_DN3306_c2_g2_i4	282	NC_001346.2 Maize streak virus - A[Ama]	2689	98.824	2435	2519	Positive	3.04e-37
	26																									TRINITY_DN10190_c0_g1_i1	281	NC_001346.2 Maize streak virus - A[Ama]	2689	97.778	1301	1345	Positive	5.21e-15
	26																									TRINITY_DN3175_c10_g1_i3	280	NC_001346.2 Maize streak virus - A[Ama]	2689	92.373	2485	2602	Positive	1.08e-41
	26																									TRINITY_DN2899_c1_g1_i1	279	NC_001346.2 Maize streak virus - A[Ama]	2689	98.684	1316	1241	Negative	1.09e-31
	26																									TRINITY_DN10755_c0_g1_i1	279	NC_001346.2 Maize streak virus - A[Ama]	2689	93.617	614	568	Negative	8.65e-13
	26																									TRINITY_DN11958_c0_g1_i1	279	NC_001346.2 Maize streak virus - A[Ama]	2689	98.78	2435	2516	Positive	1.4e-35
	26																									TRINITY_DN3181_c11_g1_i2	278	NC_001346.2 Maize streak virus - A[Ama]	2689	95.238	1331	1269	Negative	1.1e-21
	26																									TRINITY_DN3345_c5_g3_i1	277	NC_001346.2 Maize streak virus - A[Ama]	2689	98	1294	1343	Positive	8.52e-18
	26																									TRINITY_DN5093_c0_g1_i1	277	NC_001346.2 Maize streak virus - A[Ama]	2689	94.382	2429	2517	Positive	8.34e-33
	26																									TRINITY_DN13134_c0_g1_i1	275	NC_001346.2 Maize streak virus - A[Ama]	2689	98	1800	1849	Positive	8.45e-18
	26																									TRINITY_DN8839_c0_g1_i1	274	NC_001346.2 Maize streak virus - A[Ama]	2689	95.506	2520	2433	Negative	6.37e-34
	26																									TRINITY_DN13420_c0_g1_i1	274	NC_001346.2 Maize streak virus - A[Ama]	2689	97.561	2429	2510	Positive	6.37e-34
	26																									TRINITY_DN8346_c0_g1_i1	273	NC_001346.2 Maize streak virus - A[Ama]	2689	93.396	2221	2326	Positive	6.3e-39
	26																									TRINITY_DN6409_c0_g1_i1	272	NC_001346.2 Maize streak virus - A[Ama]	2689	92.105	827	752	Negative	6.41e-24
	26																									TRINITY_DN8566_c0_g1_i1	272	NC_001346.2 Maize streak virus - A[Ama]	2689	100	2252	2211	Negative	5.03e-15
	26																									TRINITY_DN3260_c1_g1_i2	272	NC_001346.2 Maize streak virus - A[Ama]	2689	99.324	762	615	Negative	2.78e-72
	26																									TRINITY_DN3375_c5_g11_i1	271	NC_001346.2 Maize streak virus - A[Ama]	2689	100	296	220	Negative	1.75e-34
	26																									TRINITY_DN3282_c14_g2_i3	271	NC_001346.2 Maize streak virus - A[Ama]	2689	95.89	1261	1332	Positive	1.06e-26
	26																									TRINITY_DN3274_c5_g1_i2	271	NC_001346.2 Maize streak virus - A[Ama]	2689	98.261	1189	1303	Positive	2.85e-52
	26																									TRINITY_DN13458_c0_g1_i1	270	NC_001346.2 Maize streak virus - A[Ama]	2689	100	730	689	Negative	4.99e-15
	26																									TRINITY_DN3240_c8_g1_i6	270	NC_001346.2 Maize streak virus - A[Ama]	2689	94.681	2498	2405	Negative	1.35e-35
	26																									TRINITY_DN2750_c0_g1_i1	269	NC_001346.2 Maize streak virus - A[Ama]	2689	100	1276	1318	Positive	1.38e-15
	26																									TRINITY_DN5173_c0_g1_i1	269	NC_001346.2 Maize streak virus - A[Ama]	2689	98.333	2468	2527	Positive	2.28e-23
	26																									TRINITY_DN13241_c0_g1_i1	268	NC_001346.2 Maize streak virus - A[Ama]	2689	100	1888	1928	Positive	1.78e-14
	26																									TRINITY_DN10920_c0_g1_i1	268	NC_001346.2 Maize streak virus - A[Ama]	2689	93.478	1280	1325	Positive	2.98e-12
	26																									TRINITY_DN2943_c0_g1_i1	268	NC_001346.2 Maize streak virus - A[Ama]	2689	100	1084	1131	Positive	2.28e-18
	26																									TRINITY_DN10932_c0_g1_i1	267	NC_001346.2 Maize streak virus - A[Ama]	2689	100	1324	1284	Negative	1.77e-14
	26																									TRINITY_DN12252_c0_g1_i1	266	NC_001346.2 Maize streak virus - A[Ama]	2689	97.619	2430	2513	Positive	4.77e-35
	26																									TRINITY_DN3431_c8_g7_i1	266	NC_001346.2 Maize streak virus - A[Ama]	2689	96.875	2560	2433	Negative	3.58e-56
	26																									TRINITY_DN7842_c0_g1_i1	266	NC_001346.2 Maize streak virus - A[Ama]	2689	98.462	1562	1498	Negative	3.74e-26
	26																									TRINITY_DN12438_c0_g1_i1	265	NC_001346.2 Maize streak virus - A[Ama]	2689	96.429	2454	2509	Positive	1.74e-19
	26																									TRINITY_DN7664_c0_g1_i1	264	NC_001346.2 Maize streak virus - A[Ama]	2689	97.297	670	706	Positive	1.36e-10
	26																									TRINITY_DN3115_c6_g1_i2	264	NC_001346.2 Maize streak virus - A[Ama]	2689	100	260	287	Positive	2.95e-07
	26																									TRINITY_DN3139_c4_g2_i1	264	NC_001346.2 Maize streak virus - A[Ama]	2689	98.413	1297	1235	Negative	4.8e-25
	26																									TRINITY_DN11230_c0_g1_i1	263	NC_001346.2 Maize streak virus - A[Ama]	2689	93.684	2524	2430	Negative	6.09e-34
	26																									TRINITY_DN3027_c1_g2_i2	262	NC_001346.2 Maize streak virus - A[Ama]	2689	100	1007	876	Negative	4.5e-65
	26																									TRINITY_DN3260_c8_g1_i9	262	NC_001346.2 Maize streak virus - A[Ama]	2689	95.714	1493	1562	Positive	4.76e-25
	26																									TRINITY_DN10336_c0_g1_i2	261	NC_001346.2 Maize streak virus - A[Ama]	2689	100	1058	1092	Positive	3.74e-11
	26																									TRINITY_DN3172_c3_g2_i1	261	NC_001346.2 Maize streak virus - A[Ama]	2689	96.078	2498	2397	Negative	9.97e-42
	26																									TRINITY_DN3186_c5_g4_i1	261	NC_001346.2 Maize streak virus - A[Ama]	2689	98.387	1876	1937	Positive	1.7e-24
	26																									TRINITY_DN7656_c0_g1_i1	260	NC_001346.2 Maize streak virus - A[Ama]	2689	98.148	2468	2521	Positive	4.75e-20
	26																									TRINITY_DN3188_c5_g1_i1	260	NC_001346.2 Maize streak virus - A[Ama]	2689	100	146	107	Negative	6.19e-14
	26																									TRINITY_DN3377_c4_g4_i1	259	NC_001346.2 Maize streak virus - A[Ama]	2689	98.387	1373	1312	Negative	1.69e-24
	26																									TRINITY_DN1543_c0_g2_i1	258	NC_001346.2 Maize streak virus - A[Ama]	2689	100	1111	1017	Negative	1.64e-44
	26																									TRINITY_DN3317_c13_g1_i1	257	NC_001346.2 Maize streak virus - A[Ama]	2689	86.667	1842	1916	Positive	1.31e-15
	26																									TRINITY_DN3795_c0_g1_i1	257	NC_001346.2 Maize streak virus - A[Ama]	2689	100	141	176	Positive	1.02e-11
	26																									TRINITY_DN1216_c0_g1_i1	256	NC_001346.2 Maize streak virus - A[Ama]	2689	97.872	1266	1312	Positive	3.64e-16
	26																									TRINITY_DN6074_c0_g1_i1	256	NC_001346.2 Maize streak virus - A[Ama]	2689	98.148	1328	1275	Negative	4.67e-20
	26																									TRINITY_DN3120_c5_g1_i4	256	NC_001346.2 Maize streak virus - A[Ama]	2689	100	383	220	Negative	7.13e-83
	26																									TRINITY_DN13776_c0_g1_i1	255	NC_001346.2 Maize streak virus - A[Ama]	2689	100	1884	1913	Positive	2.19e-08
	26																									TRINITY_DN3428_c7_g1_i1	255	NC_001346.2 Maize streak virus - A[Ama]	2689	100	1276	1331	Positive	7.73e-23
	26																									TRINITY_DN3175_c0_g1_i1	255	NC_001346.2 Maize streak virus - A[Ama]	2689	100	2655	2682	Positive	2.84e-07
	26																									TRINITY_DN3175_c10_g1_i2	255	NC_001346.2 Maize streak virus - A[Ama]	2689	95.699	2485	2576	Positive	3.52e-36
	26																									TRINITY_DN3103_c8_g2_i1	254	NC_001346.2 Maize streak virus - A[Ama]	2689	98.876	1302	1214	Negative	1.62e-39
	26																									TRINITY_DN3120_c5_g1_i3	254	NC_001346.2 Maize streak virus - A[Ama]	2689	100	372	220	Negative	9.21e-77
	26																									TRINITY_DN3392_c10_g1_i3	253	NC_001346.2 Maize streak virus - A[Ama]	2689	97.931	261	120	Negative	3.34e-66
	26																									TRINITY_DN6920_c0_g1_i1	253	NC_001346.2 Maize streak virus - A[Ama]	2689	100	2524	2483	Negative	4.64e-15
	26																									TRINITY_DN13944_c0_g1_i1	253	NC_001346.2 Maize streak virus - A[Ama]	2689	98.077	631	580	Negative	5.96e-19
	26																									TRINITY_DN3299_c5_g4_i1	253	NC_001346.2 Maize streak virus - A[Ama]	2689	100	1338	1287	Negative	1.28e-20
	26																									TRINITY_DN6623_c0_g1_i1	252	NC_001346.2 Maize streak virus - A[Ama]	2689	97.436	1344	1306	Negative	1e-11
	26																									TRINITY_DN6994_c0_g1_i1	252	NC_001346.2 Maize streak virus - A[Ama]	2689	96.97	2444	2509	Positive	4.56e-25
	26																									TRINITY_DN12796_c0_g1_i1	251	NC_001346.2 Maize streak virus - A[Ama]	2689	100	1816	1851	Positive	9.97e-12
	26																									TRINITY_DN10209_c0_g1_i1	251	NC_001346.2 Maize streak virus - A[Ama]	2689	98.276	1859	1802	Negative	2.73e-22
	26																									TRINITY_DN1790_c0_g1_i1	251	NC_001346.2 Maize streak virus - A[Ama]	2689	97.297	1345	1309	Negative	1.29e-10
	26																									TRINITY_DN446_c0_g1_i1	250	NC_001346.2 Maize streak virus - A[Ama]	2689	97.222	2429	2464	Positive	4.62e-10
	26																									TRINITY_DN8478_c0_g1_i1	250	NC_001346.2 Maize streak virus - A[Ama]	2689	98.571	216	285	Positive	5.8e-29
	26																									TRINITY_DN3398_c7_g2_i1	249	NC_001346.2 Maize streak virus - A[Ama]	2689	100	862	807	Negative	7.53e-23
	26																									TRINITY_DN3407_c7_g1_i13	249	NC_001346.2 Maize streak virus - A[Ama]	2689	100	1112	1037	Negative	5.74e-34
	26																									TRINITY_DN3222_c6_g3_i2	249	NC_001346.2 Maize streak virus - A[Ama]	2689	98.551	1617	1549	Negative	7.48e-28
	26																									TRINITY_DN4847_c0_g1_i1	248	NC_001346.2 Maize streak virus - A[Ama]	2689	100	234	300	Positive	5.75e-29
	26																									TRINITY_DN2227_c0_g2_i1	248	NC_001346.2 Maize streak virus - A[Ama]	2689	98.387	436	375	Negative	1.61e-24
	26																									TRINITY_DN3398_c9_g2_i5	247	NC_001346.2 Maize streak virus - A[Ama]	2689	97.701	87	1	Negative	9.45e-37
	26																									TRINITY_DN3336_c8_g5_i2	247	NC_001346.2 Maize streak virus - A[Ama]	2689	96.97	2527	2429	Negative	9.38e-42
	26																									TRINITY_DN231_c0_g1_i1	247	NC_001346.2 Maize streak virus - A[Ama]	2689	97.521	2407	2527	Positive	5.53e-54
	26																									TRINITY_DN3157_c7_g5_i8	247	NC_001346.2 Maize streak virus - A[Ama]	2689	96	1251	1349	Positive	4.37e-40
	26																									TRINITY_DN386_c0_g1_i2	246	NC_001346.2 Maize streak virus - A[Ama]	2689	100	1042	1083	Positive	4.5e-15
	26																									TRINITY_DN1652_c0_g1_i1	246	NC_001346.2 Maize streak virus - A[Ama]	2689	95	431	392	Negative	1.26e-10
	26																									TRINITY_DN3427_c8_g3_i1	246	NC_001346.2 Maize streak virus - A[Ama]	2689	98.148	1127	1074	Negative	4.47e-20
	26																									TRINITY_DN3222_c6_g16_i1	246	NC_001346.2 Maize streak virus - A[Ama]	2689	100	1329	1302	Negative	2.73e-07
	26																									TRINITY_DN3232_c1_g3_i2	246	NC_001346.2 Maize streak virus - A[Ama]	2689	96.907	2523	2427	Negative	1.21e-40
	26																									TRINITY_DN8015_c0_g1_i1	246	NC_001346.2 Maize streak virus - A[Ama]	2689	96.875	1343	1312	Negative	7.59e-08
	26																									TRINITY_DN3062_c1_g1_i1	245	NC_001346.2 Maize streak virus - A[Ama]	2689	100	325	434	Positive	7.09e-53
	26																									TRINITY_DN3096_c12_g5_i1	245	NC_001346.2 Maize streak virus - A[Ama]	2689	100	1106	979	Negative	6.99e-63
	26																									TRINITY_DN3027_c1_g1_i1	245	NC_001346.2 Maize streak virus - A[Ama]	2689	100	1037	956	Negative	2.6e-37
	26																									TRINITY_DN4613_c0_g1_i1	245	NC_001346.2 Maize streak virus - A[Ama]	2689	97.015	587	653	Positive	1.23e-25
	26																									TRINITY_DN11489_c0_g1_i1	245	NC_001346.2 Maize streak virus - A[Ama]	2689	100	1570	1628	Positive	1.59e-24
	26																									TRINITY_DN6448_c0_g1_i1	244	NC_001346.2 Maize streak virus - A[Ama]	2689	92.647	2568	2501	Negative	3.43e-21
	26																									TRINITY_DN5822_c0_g1_i2	243	NC_001346.2 Maize streak virus - A[Ama]	2689	98.45	1397	1525	Positive	4.17e-60
	26																									TRINITY_DN2088_c1_g1_i1	243	NC_001346.2 Maize streak virus - A[Ama]	2689	100	1861	1802	Negative	4.38e-25
	26																									TRINITY_DN3178_c31_g3_i4	242	NC_001346.2 Maize streak virus - A[Ama]	2689	95.429	1958	2132	Positive	4.06e-75
	26																									TRINITY_DN3178_c31_g2_i7	242	NC_001346.2 Maize streak virus - A[Ama]	2689	98.742	1433	1275	Negative	8.73e-77
	26																									TRINITY_DN3120_c5_g1_i2	241	NC_001346.2 Maize streak virus - A[Ama]	2689	96.629	394	220	Negative	5.19e-79
	26																									TRINITY_DN7756_c0_g1_i1	241	NC_001346.2 Maize streak virus - A[Ama]	2689	96.774	2430	2522	Positive	1.98e-38
	26																									TRINITY_DN3384_c6_g2_i12	239	NC_001346.2 Maize streak virus - A[Ama]	2689	96.825	1099	1037	Negative	7.2e-23
	26																									TRINITY_DN2483_c0_g1_i1	239	NC_001346.2 Maize streak virus - A[Ama]	2689	92.308	1610	1520	Negative	4.27e-30
	26																									TRINITY_DN3178_c31_g3_i2	239	NC_001346.2 Maize streak virus - A[Ama]	2689	92.754	1971	2107	Positive	3.21e-51
	26																									TRINITY_DN2643_c0_g1_i1	239	NC_001346.2 Maize streak virus - A[Ama]	2689	97.101	2543	2475	Negative	9.24e-27
	26																									TRINITY_DN11626_c0_g1_i1	239	NC_001346.2 Maize streak virus - A[Ama]	2689	98.333	467	408	Negative	2e-23
	26																									TRINITY_DN12752_c0_g1_i1	238	NC_001346.2 Maize streak virus - A[Ama]	2689	98.113	2492	2440	Negative	1.55e-19
	26																									TRINITY_DN2950_c0_g1_i1	238	NC_001346.2 Maize streak virus - A[Ama]	2689	94.545	226	280	Positive	9.33e-17
	26																									TRINITY_DN3103_c8_g1_i1	238	NC_001346.2 Maize streak virus - A[Ama]	2689	100	1037	979	Negative	1.54e-24
	26																									TRINITY_DN3175_c12_g1_i8	238	NC_001346.2 Maize streak virus - A[Ama]	2689	98.305	1599	1482	Negative	5.31e-54
	26																									TRINITY_DN3246_c5_g1_i1	238	NC_001346.2 Maize streak virus - A[Ama]	2689	96.386	2508	2426	Negative	7.06e-33
	26																									TRINITY_DN1927_c0_g1_i1	238	NC_001346.2 Maize streak virus - A[Ama]	2689	100	1816	1849	Positive	1.22e-10
	26																									TRINITY_DN3345_c7_g1_i3	236	NC_001346.2 Maize streak virus - A[Ama]	2689	93.333	2134	2000	Negative	3.17e-51
	26																									TRINITY_DN9849_c0_g1_i1	236	NC_001346.2 Maize streak virus - A[Ama]	2689	97.436	2512	2474	Negative	9.31e-12
	26																									TRINITY_DN11404_c0_g1_i1	236	NC_001346.2 Maize streak virus - A[Ama]	2689	98.63	2031	1959	Negative	1.17e-30
	26																									TRINITY_DN14020_c0_g1_i1	236	NC_001346.2 Maize streak virus - A[Ama]	2689	100	1298	1328	Positive	5.6e-09
	26																									TRINITY_DN1529_c0_g1_i1	236	NC_001346.2 Maize streak virus - A[Ama]	2689	100	1312	1279	Negative	1.2e-10
	26																									TRINITY_DN9601_c0_g1_i1	235	NC_001346.2 Maize streak virus - A[Ama]	2689	98.039	1546	1496	Negative	1.98e-18
	26																									TRINITY_DN2294_c0_g1_i4	234	NC_001346.2 Maize streak virus - A[Ama]	2689	98	441	392	Negative	7.08e-18
	26																									TRINITY_DN3427_c11_g5_i1	234	NC_001346.2 Maize streak virus - A[Ama]	2689	100	361	297	Negative	6.98e-28
	26																									TRINITY_DN12674_c0_g1_i1	234	NC_001346.2 Maize streak virus - A[Ama]	2689	98.305	1337	1279	Negative	7.03e-23
	26																									TRINITY_DN3352_c7_g8_i1	233	NC_001346.2 Maize streak virus - A[Ama]	2689	98.276	1481	1596	Positive	6.71e-53
	26																									TRINITY_DN13873_c0_g1_i1	233	NC_001346.2 Maize streak virus - A[Ama]	2689	100	1809	1859	Positive	4.21e-20
	26																									TRINITY_DN3427_c15_g1_i1	233	NC_001346.2 Maize streak virus - A[Ama]	2689	96.104	659	583	Negative	5.37e-29
	26																									TRINITY_DN3356_c7_g1_i1	232	NC_001346.2 Maize streak virus - A[Ama]	2689	99.038	315	418	Positive	6.72e-48
	26																									TRINITY_DN1214_c0_g1_i1	232	NC_001346.2 Maize streak virus - A[Ama]	2689	100	1302	1338	Positive	2.54e-12
	26																									TRINITY_DN3103_c8_g3_i1	231	NC_001346.2 Maize streak virus - A[Ama]	2689	98.361	1236	1176	Negative	5.36e-24
	26																									TRINITY_DN3178_c31_g3_i3	231	NC_001346.2 Maize streak virus - A[Ama]	2689	93.805	1958	2070	Positive	2.42e-42
	26																									TRINITY_DN3967_c0_g1_i1	231	NC_001346.2 Maize streak virus - A[Ama]	2689	93.878	1449	1402	Negative	1.95e-13
	26																									TRINITY_DN2731_c1_g1_i1	230	NC_001346.2 Maize streak virus - A[Ama]	2689	100	1829	1774	Negative	6.9e-23
	26																									TRINITY_DN11749_c0_g1_i1	230	NC_001346.2 Maize streak virus - A[Ama]	2689	100	1287	1340	Positive	8.92e-22
	26																									TRINITY_DN3360_c0_g2_i1	229	NC_001346.2 Maize streak virus - A[Ama]	2689	100	1765	1799	Positive	3.24e-11
	26																									TRINITY_DN10325_c0_g1_i1	229	NC_001346.2 Maize streak virus - A[Ama]	2689	95.833	1317	1270	Negative	4.16e-15
	26																									TRINITY_DN9475_c0_g1_i1	229	NC_001346.2 Maize streak virus - A[Ama]	2689	93.333	1921	1965	Positive	9.01e-12
	26																									TRINITY_DN282_c0_g1_i1	229	NC_001346.2 Maize streak virus - A[Ama]	2689	98.837	1615	1530	Negative	6.72e-38
	26																									TRINITY_DN3325_c2_g2_i1	228	NC_001346.2 Maize streak virus - A[Ama]	2689	98.182	1465	1411	Negative	1.14e-20
	26																									TRINITY_DN10346_c0_g1_i1	228	NC_001346.2 Maize streak virus - A[Ama]	2689	100	2514	2486	Negative	6.98e-08
	26																									TRINITY_DN8738_c0_g1_i1	227	NC_001346.2 Maize streak virus - A[Ama]	2689	100	1317	1279	Negative	1.92e-13
	26																									TRINITY_DN3178_c31_g1_i2	227	NC_001346.2 Maize streak virus - A[Ama]	2689	94.574	2525	2397	Negative	8.43e-52
	26																									TRINITY_DN12551_c0_g1_i1	226	NC_001346.2 Maize streak virus - A[Ama]	2689	95.745	2429	2383	Negative	5.31e-14
	26																									TRINITY_DN13721_c0_g1_i1	225	NC_001346.2 Maize streak virus - A[Ama]	2689	100	1143	1102	Negative	4.08e-15
	26																									TRINITY_DN264_c0_g1_i1	225	NC_001346.2 Maize streak virus - A[Ama]	2689	97.222	1356	1285	Negative	6.69e-28
	26																									TRINITY_DN3267_c6_g1_i6	225	NC_001346.2 Maize streak virus - A[Ama]	2689	94.915	1316	1258	Negative	1.46e-19
	26																									TRINITY_DN3120_c5_g1_i1	224	NC_001346.2 Maize streak virus - A[Ama]	2689	100	317	220	Negative	3.01e-46
	26																									TRINITY_DN1585_c0_g1_i1	224	NC_001346.2 Maize streak virus - A[Ama]	2689	97.619	2518	2477	Negative	1.89e-13
	26																									TRINITY_DN3230_c2_g1_i21	223	NC_001346.2 Maize streak virus - A[Ama]	2689	98.485	1531	1596	Positive	8.56e-27
	26																									TRINITY_DN3277_c3_g2_i6	223	NC_001346.2 Maize streak virus - A[Ama]	2689	98.529	1354	1287	Negative	6.62e-28
	26																									TRINITY_DN3077_c1_g4_i1	222	NC_001346.2 Maize streak virus - A[Ama]	2689	97.727	2433	2520	Positive	2.34e-37
	26																									TRINITY_DN3374_c3_g3_i2	221	NC_001346.2 Maize streak virus - A[Ama]	2689	97.802	2429	2519	Positive	5e-39
	26																									TRINITY_DN2896_c1_g2_i1	221	NC_001346.2 Maize streak virus - A[Ama]	2689	97.26	1794	1866	Positive	5.07e-29
	26																									TRINITY_DN3410_c5_g4_i1	221	NC_001346.2 Maize streak virus - A[Ama]	2689	100	2518	2481	Negative	6.69e-13
	26																									TRINITY_DN3322_c3_g1_i7	220	NC_001346.2 Maize streak virus - A[Ama]	2689	100	723	687	Negative	2.4e-12
	26																									TRINITY_DN3299_c2_g1_i4	220	NC_001346.2 Maize streak virus - A[Ama]	2689	95.556	1746	1658	Negative	1.39e-34
	26																									TRINITY_DN957_c0_g1_i1	219	NC_001346.2 Maize streak virus - A[Ama]	2689	97	2427	2526	Positive	2.28e-42
	26																									TRINITY_DN11154_c0_g1_i1	219	NC_001346.2 Maize streak virus - A[Ama]	2689	93.333	1330	1287	Negative	3.08e-11
	26																									TRINITY_DN3260_c1_g1_i1	219	NC_001346.2 Maize streak virus - A[Ama]	2689	99.029	717	615	Negative	2.27e-47
	26																									TRINITY_DN3212_c7_g4_i1	219	NC_001346.2 Maize streak virus - A[Ama]	2689	97.015	1774	1708	Negative	1.09e-25
	26																									TRINITY_DN3110_c3_g1_i1	218	NC_001346.2 Maize streak virus - A[Ama]	2689	97.468	2512	2434	Negative	2.31e-32
	26																									TRINITY_DN916_c0_g2_i1	217	NC_001346.2 Maize streak virus - A[Ama]	2689	100	1328	1283	Negative	2.34e-17
	26																									TRINITY_DN4261_c0_g1_i1	217	NC_001346.2 Maize streak virus - A[Ama]	2689	92	628	677	Positive	2.36e-12
	26																									TRINITY_DN3115_c7_g14_i1	217	NC_001346.2 Maize streak virus - A[Ama]	2689	96.875	454	517	Positive	1.8e-23
	26																									TRINITY_DN14043_c0_g1_i1	217	NC_001346.2 Maize streak virus - A[Ama]	2689	100	1326	1295	Negative	1.42e-09
	26																									TRINITY_DN3277_c3_g4_i2	217	NC_001346.2 Maize streak virus - A[Ama]	2689	96.386	1354	1274	Negative	2.29e-32
	26																									TRINITY_DN3215_c5_g6_i1	217	NC_001346.2 Maize streak virus - A[Ama]	2689	96.721	2321	2442	Positive	6.2e-53
	26																									TRINITY_DN3027_c1_g2_i1	216	NC_001346.2 Maize streak virus - A[Ama]	2689	100	998	922	Negative	1.36e-34
	26																									TRINITY_DN3240_c8_g1_i3	215	NC_001346.2 Maize streak virus - A[Ama]	2689	93.333	2494	2405	Negative	8.16e-32
	26																									TRINITY_DN3170_c11_g1_i1	214	NC_001346.2 Maize streak virus - A[Ama]	2689	87.097	1584	1527	Negative	3.01e-11
	26																									TRINITY_DN3264_c3_g1_i3	214	NC_001346.2 Maize streak virus - A[Ama]	2689	96.97	1671	1703	Positive	1.81e-08
	26																									TRINITY_DN3178_c31_g3_i1	213	NC_001346.2 Maize streak virus - A[Ama]	2689	94.836	1958	2170	Positive	7.42e-92
	26																									TRINITY_DN1361_c0_g1_i1	212	NC_001346.2 Maize streak virus - A[Ama]	2689	98.485	1380	1315	Negative	8.09e-27
	26																									TRINITY_DN8282_c0_g1_i1	212	NC_001346.2 Maize streak virus - A[Ama]	2689	98.182	2288	2342	Positive	1.05e-20
	26																									TRINITY_DN3103_c8_g2_i2	211	NC_001346.2 Maize streak virus - A[Ama]	2689	97.63	1386	1176	Negative	9.37e-101
	26																									TRINITY_DN3170_c11_g1_i9	211	NC_001346.2 Maize streak virus - A[Ama]	2689	99.107	1403	1292	Negative	2.16e-52
	26																									TRINITY_DN3175_c10_g1_i1	211	NC_001346.2 Maize streak virus - A[Ama]	2689	96.629	2485	2573	Positive	2.86e-36
	26																									TRINITY_DN3398_c9_g2_i6	210	NC_001346.2 Maize streak virus - A[Ama]	2689	100	1106	1063	Negative	2.92e-16
	26																									TRINITY_DN3198_c6_g3_i4	210	NC_001346.2 Maize streak virus - A[Ama]	2689	98.571	1285	1354	Positive	4.79e-29
	26																									TRINITY_DN3383_c2_g1_i1	209	NC_001346.2 Maize streak virus - A[Ama]	2689	96.491	1662	1775	Positive	1.66e-48
	26																									TRINITY_DN654_c1_g1_i1	209	NC_001346.2 Maize streak virus - A[Ama]	2689	97.674	1311	1353	Positive	4.86e-14
	26																									TRINITY_DN3265_c8_g3_i1	209	NC_001346.2 Maize streak virus - A[Ama]	2689	98	1609	1560	Negative	6.25e-18
	26																									TRINITY_DN1145_c0_g1_i2	208	NC_001346.2 Maize streak virus - A[Ama]	2689	98.684	1354	1279	Negative	2.19e-32
	26																									TRINITY_DN3103_c8_g5_i1	208	NC_001346.2 Maize streak virus - A[Ama]	2689	94.175	1316	1214	Negative	1.68e-38
	26																									TRINITY_DN3211_c3_g1_i1	208	NC_001346.2 Maize streak virus - A[Ama]	2689	98.462	198	261	Positive	1.03e-25
	26																									TRINITY_DN3120_c5_g1_i5	207	NC_001346.2 Maize streak virus - A[Ama]	2689	98.837	305	220	Negative	2.16e-37
	26																									TRINITY_DN3299_c2_g1_i3	207	NC_001346.2 Maize streak virus - A[Ama]	2689	97.701	1744	1658	Negative	7.77e-37
	26																									TRINITY_DN3240_c8_g1_i4	207	NC_001346.2 Maize streak virus - A[Ama]	2689	95.652	2473	2405	Negative	3.67e-25
	26																									TRINITY_DN3212_c7_g6_i1	206	NC_001346.2 Maize streak virus - A[Ama]	2689	96.703	1798	1708	Negative	2.15e-37
	26																									TRINITY_DN6776_c0_g1_i1	205	NC_001346.2 Maize streak virus - A[Ama]	2689	98.81	406	489	Positive	7.69e-37
	26																									TRINITY_DN3397_c5_g1_i1	204	NC_001346.2 Maize streak virus - A[Ama]	2689	94.595	1940	2013	Positive	2.79e-26
	26																									TRINITY_DN3240_c8_g1_i2	204	NC_001346.2 Maize streak virus - A[Ama]	2689	95.041	2525	2405	Negative	1.62e-48
	26																									TRINITY_DN3068_c0_g1_i1	203	NC_001346.2 Maize streak virus - A[Ama]	2689	96.226	1760	1708	Negative	6.05e-18
	26																									TRINITY_DN1226_c0_g2_i1	203	NC_001346.2 Maize streak virus - A[Ama]	2689	96	1703	1776	Positive	5.96e-28
	26																									TRINITY_DN3445_c23_g1_i1	203	NC_001346.2 Maize streak virus - A[Ama]	2689	97.297	936	972	Positive	1.02e-10
	26																									TRINITY_DN3240_c8_g1_i1	202	NC_001346.2 Maize streak virus - A[Ama]	2689	96.61	2562	2445	Negative	9.58e-51
Researcher	Sample	Host	Total	Total	Unique_Contigs	Total	Contigs	Maize yellow dwarf virus-RMV2									Sugarcane mosaic virus									Maize streak virus									Maize Chlorotic mottle virus									NC_032912.1 Hubei Poty-like virus 1 strain SCM51506 polyprotein gene
		Maize Leaf	Sequences	Contigs	matching to Virus	virus	Unmatch_to _PVGDB/NCBI	Contig	Contig	Reference	Reference	%	Coordinates		Polarity	E	Contig	Conting	Reference	Reference	%	Coordinates		Polarity	E	Conting	Conting	Reference	Reference	%	Coordinates		Polarity	E	Conting	Conting	Reference	Reference	%	Coordinates		Polarity	E	Conting	Conting	Reference	Reference	%	Coordinates
	27		605758	12458	340	4	3238		Length		Length	identity	Start	End		value		Length		Length	identity	Start	End		value		Length		Length	identity	Start	End		value		Length		Length	identity	Start	End		value		Length		Length	identity	Start
	27							TRINITY_DN379_c0_g1_i1	1331	NC_029990.1 Maize yellow dwarf virus-RMV2	5625	97.673	4134	2892	Negative	0	TRINITY_DN1400_c0_g3_i3	3155	NC_003398.1 Sugarcane mosaic virus	9596	77.83	18	3163	Positive	0	TRINITY_DN1402_c0_g1_i2	722	NC_001346.2 Maize streak virus - A[Ama]	2689	98.061	975	254	Negative	0	TRINITY_DN1408_c13_g1_i6	1994	NC_003627.1 Maize chlorotic mottle virus genomic RNA	4437	96.54	3591	1598	Negative	0	TRINITY_DN1278_c0_g1_i1	961	NC_032912.1 Hubei Poty-like virus 1 strain SCM51506 polyprotein gene	9356	76.176	6520
	27							TRINITY_DN379_c0_g1_i1	1331	NC_029990.1 Maize yellow dwarf virus-RMV2	5625	96	4261	4162	Negative	7.05e-40	TRINITY_DN1400_c0_g3_i2	895	NC_003398.1 Sugarcane mosaic virus	9596	82.739	2276	3139	Positive	0	TRINITY_DN3037_c0_g1_i1	678	NC_001346.2 Maize streak virus - A[Ama]	2689	96.313	2417	1740	Negative	0	TRINITY_DN1408_c13_g1_i21	1981	NC_003627.1 Maize chlorotic mottle virus genomic RNA	4437	96.519	3493	1598	Negative	0
	27							TRINITY_DN379_c0_g1_i2	1291	NC_029990.1 Maize yellow dwarf virus-RMV2	5625	97.205	4176	2892	Negative	0	TRINITY_DN1402_c1_g2_i1	461	NC_003398.1 Sugarcane mosaic virus	9596	92.842	9304	8844	Negative	0	TRINITY_DN1167_c0_g1_i1	623	NC_001346.2 Maize streak virus - A[Ama]	2689	98.774	1007	1577	Positive	0	TRINITY_DN1408_c13_g1_i2	1949	NC_003627.1 Maize chlorotic mottle virus genomic RNA	4437	96.386	3423	1598	Negative	0
	27							TRINITY_DN922_c0_g1_i1	941	NC_029990.1 Maize yellow dwarf virus-RMV2	5625	95.537	4456	5396	Positive	0	TRINITY_DN2994_c0_g1_i1	402	NC_003398.1 Sugarcane mosaic virus	9596	91.837	5437	5046	Negative	4.84e-156	TRINITY_DN1167_c0_g1_i1	623	NC_001346.2 Maize streak virus - A[Ama]	2689	98.387	1667	1606	Negative	4.28e-24	TRINITY_DN1408_c13_g1_i5	1917	NC_003627.1 Maize chlorotic mottle virus genomic RNA	4437	96.321	3418	1598	Negative	0
	27							TRINITY_DN6566_c0_g1_i1	913	NC_029990.1 Maize yellow dwarf virus-RMV2	5625	98.248	926	14	Negative	0	TRINITY_DN5052_c0_g1_i1	319	NC_003398.1 Sugarcane mosaic virus	9596	90.909	1856	1538	Negative	1.43e-120	TRINITY_DN1167_c0_g1_i2	623	NC_001346.2 Maize streak virus - A[Ama]	2689	99.035	1007	1628	Positive	0	TRINITY_DN1388_c16_g1_i1	1891	NC_003627.1 Maize chlorotic mottle virus genomic RNA	4437	96.689	1674	14	Negative	0
	27							TRINITY_DN963_c0_g1_i1	845	NC_029990.1 Maize yellow dwarf virus-RMV2	5625	97.041	1039	1883	Positive	0	TRINITY_DN1680_c0_g1_i1	229	NC_003398.1 Sugarcane mosaic virus	9596	91.228	840	1067	Positive	3.77e-85	TRINITY_DN1402_c0_g1_i1	321	NC_001346.2 Maize streak virus - A[Ama]	2689	96.573	574	254	Negative	1.07e-151	TRINITY_DN1388_c16_g1_i2	1765	NC_003627.1 Maize chlorotic mottle virus genomic RNA	4437	96.685	1672	14	Negative	0
	27																																		TRINITY_DN1408_c13_g1_i8	1707	NC_003627.1 Maize chlorotic mottle virus genomic RNA	4437	96.161	3134	1598	Negative	0
	27																																		TRINITY_DN1408_c13_g1_i17	1690	NC_003627.1 Maize chlorotic mottle virus genomic RNA	4437	95.764	3225	1598	Negative	0
	27																																		TRINITY_DN1215_c1_g1_i1	1551	NC_003627.1 Maize chlorotic mottle virus genomic RNA	4437	93.333	3393	3349	Negative	6.64e-11
	27																																		TRINITY_DN1408_c13_g1_i20	1536	NC_003627.1 Maize chlorotic mottle virus genomic RNA	4437	95.874	3027	1598	Negative	0
	27																																		TRINITY_DN1408_c13_g1_i13	1367	NC_003627.1 Maize chlorotic mottle virus genomic RNA	4437	96.154	2793	1598	Negative	0
	27																																		TRINITY_DN1366_c6_g1_i2	1171	NC_003627.1 Maize chlorotic mottle virus genomic RNA	4437	97.235	4414	3366	Negative	0
	27																																		TRINITY_DN1475_c0_g1_i1	875	NC_003627.1 Maize chlorotic mottle virus genomic RNA	4437	95.294	3646	3730	Positive	1e-31
	27																																		TRINITY_DN1138_c0_g2_i1	864	NC_003627.1 Maize chlorotic mottle virus genomic RNA	4437	100	2706	2660	Negative	2.81e-17
	27																																		TRINITY_DN8179_c0_g1_i1	825	NC_003627.1 Maize chlorotic mottle virus genomic RNA	4437	96.591	221	308	Positive	4.36e-35
	27																																		TRINITY_DN1345_c5_g1_i3	795	NC_003627.1 Maize chlorotic mottle virus genomic RNA	4437	100	1008	981	Negative	9.4e-07
	27																																		TRINITY_DN1363_c0_g1_i4	738	NC_003627.1 Maize chlorotic mottle virus genomic RNA	4437	94.737	2064	2009	Negative	2.39e-17
	27																																		TRINITY_DN1348_c5_g1_i3	726	NC_003627.1 Maize chlorotic mottle virus genomic RNA	4437	96.35	14	150	Positive	4.77e-59
	27																																		TRINITY_DN1320_c1_g3_i1	724	NC_003627.1 Maize chlorotic mottle virus genomic RNA	4437	95.122	1881	1962	Positive	1.38e-29
	27																																		TRINITY_DN1097_c0_g1_i2	713	NC_003627.1 Maize chlorotic mottle virus genomic RNA	4437	95.833	48	143	Positive	6.23e-38
	27																																		TRINITY_DN376_c0_g1_i1	705	NC_003627.1 Maize chlorotic mottle virus genomic RNA	4437	97.531	2667	2747	Positive	2.23e-32
	27																																		TRINITY_DN967_c0_g1_i1	665	NC_003627.1 Maize chlorotic mottle virus genomic RNA	4437	93.878	909	813	Negative	3.49e-35
	27																																		TRINITY_DN1052_c0_g1_i2	659	NC_003627.1 Maize chlorotic mottle virus genomic RNA	4437	96.591	829	915	Positive	1.24e-34
	27																																		TRINITY_DN190_c0_g1_i3	643	NC_003627.1 Maize chlorotic mottle virus genomic RNA	4437	94.186	1294	1209	Negative	9.43e-31
	27																																		TRINITY_DN1307_c0_g2_i2	642	NC_003627.1 Maize chlorotic mottle virus genomic RNA	4437	98.361	4411	4351	Negative	1.59e-23
	27																																		TRINITY_DN1363_c0_g2_i1	629	NC_003627.1 Maize chlorotic mottle virus genomic RNA	4437	97.541	781	902	Positive	4.14e-54
	27																																		TRINITY_DN1098_c0_g1_i1	611	NC_003627.1 Maize chlorotic mottle virus genomic RNA	4437	98.611	2953	3024	Positive	1.16e-29
	27																																		TRINITY_DN1408_c13_g7_i1	604	NC_003627.1 Maize chlorotic mottle virus genomic RNA	4437	96.842	1946	1852	Negative	4.05e-39
	27																																		TRINITY_DN1362_c1_g1_i2	573	NC_003627.1 Maize chlorotic mottle virus genomic RNA	4437	98.485	2962	3027	Positive	2.34e-26
	27																																		TRINITY_DN921_c0_g1_i1	571	NC_003627.1 Maize chlorotic mottle virus genomic RNA	4437	98.413	2992	3054	Positive	3.91e-24
	27																																		TRINITY_DN1095_c0_g1_i2	567	NC_003627.1 Maize chlorotic mottle virus genomic RNA	4437	97.436	2453	2530	Positive	8.27e-31
	27																																		TRINITY_DN1750_c0_g1_i1	567	NC_003627.1 Maize chlorotic mottle virus genomic RNA	4437	98.75	3348	3427	Positive	3.82e-34
	27																																		TRINITY_DN1199_c0_g1_i2	565	NC_003627.1 Maize chlorotic mottle virus genomic RNA	4437	94.03	856	921	Positive	2.32e-21
	27																																		TRINITY_DN1069_c0_g1_i1	554	NC_003627.1 Maize chlorotic mottle virus genomic RNA	4437	91.25	2628	2549	Negative	1.76e-22
	27																																		TRINITY_DN1227_c0_g1_i3	540	NC_003627.1 Maize chlorotic mottle virus genomic RNA	4437	100	3437	3481	Positive	2.23e-16
	27																																		TRINITY_DN1234_c1_g1_i2	538	NC_003627.1 Maize chlorotic mottle virus genomic RNA	4437	98	3684	3733	Positive	1.72e-17
	27																																		TRINITY_DN1292_c1_g1_i4	522	NC_003627.1 Maize chlorotic mottle virus genomic RNA	4437	97.531	553	632	Positive	1.63e-32
	27																																		TRINITY_DN1329_c10_g1_i6	513	NC_003627.1 Maize chlorotic mottle virus genomic RNA	4437	94.595	1811	1776	Negative	4.61e-08
	27																																		TRINITY_DN569_c0_g1_i1	503	NC_003627.1 Maize chlorotic mottle virus genomic RNA	4437	100	920	879	Negative	9.65e-15
	27																																		TRINITY_DN710_c0_g1_i1	491	NC_003627.1 Maize chlorotic mottle virus genomic RNA	4437	94.231	869	920	Positive	9.41e-15
	27																																		TRINITY_DN6698_c0_g1_i2	485	NC_003627.1 Maize chlorotic mottle virus genomic RNA	4437	92.188	294	357	Positive	1.54e-17
	27																																		TRINITY_DN5412_c0_g1_i1	485	NC_003627.1 Maize chlorotic mottle virus genomic RNA	4437	93.814	1380	1475	Positive	9.03e-35
	27																																		TRINITY_DN2795_c0_g1_i1	470	NC_003627.1 Maize chlorotic mottle virus genomic RNA	4437	95.789	1641	1548	Negative	5.22e-37
	27																																		TRINITY_DN1155_c1_g1_i2	468	NC_003627.1 Maize chlorotic mottle virus genomic RNA	4437	96.552	576	490	Negative	8.69e-35
	27																																		TRINITY_DN1194_c1_g1_i2	462	NC_003627.1 Maize chlorotic mottle virus genomic RNA	4437	97.297	2929	2893	Negative	2.47e-10
	27																																		TRINITY_DN1336_c7_g9_i1	461	NC_003627.1 Maize chlorotic mottle virus genomic RNA	4437	100	928	1022	Positive	3.03e-44
	27																																		TRINITY_DN8441_c0_g1_i1	460	NC_003627.1 Maize chlorotic mottle virus genomic RNA	4437	90.598	2859	2743	Negative	3.94e-38
	27																																		TRINITY_DN1355_c5_g1_i2	457	NC_003627.1 Maize chlorotic mottle virus genomic RNA	4437	90.698	755	797	Positive	4.09e-08
	27																																		TRINITY_DN1293_c0_g3_i1	447	NC_003627.1 Maize chlorotic mottle virus genomic RNA	4437	96.471	926	842	Negative	1.07e-33
	27																																		TRINITY_DN2806_c0_g1_i1	446	NC_003627.1 Maize chlorotic mottle virus genomic RNA	4437	97.674	1918	1960	Positive	1.1e-13
	27																																		TRINITY_DN975_c0_g1_i1	442	NC_003627.1 Maize chlorotic mottle virus genomic RNA	4437	95.122	4275	4356	Positive	2.29e-30
	27																																		TRINITY_DN953_c0_g1_i1	432	NC_003627.1 Maize chlorotic mottle virus genomic RNA	4437	95.385	80	144	Positive	1.36e-22
	27																																		TRINITY_DN1221_c0_g1_i3	431	NC_003627.1 Maize chlorotic mottle virus genomic RNA	4437	89.286	923	869	Negative	4.95e-12
	27																																		TRINITY_DN1694_c0_g1_i1	418	NC_003627.1 Maize chlorotic mottle virus genomic RNA	4437	97.143	2679	2783	Positive	7.63e-45
	27																																		TRINITY_DN6776_c0_g1_i1	408	NC_003627.1 Maize chlorotic mottle virus genomic RNA	4437	100	1325	1356	Positive	2.81e-09
	27																																		TRINITY_DN1062_c0_g1_i1	401	NC_003627.1 Maize chlorotic mottle virus genomic RNA	4437	97.436	414	376	Negative	1.65e-11
	27																																		TRINITY_DN1290_c2_g1_i2	398	NC_003627.1 Maize chlorotic mottle virus genomic RNA	4437	98.02	816	916	Positive	2.61e-44
	27																																		TRINITY_DN1303_c13_g2_i3	396	NC_003627.1 Maize chlorotic mottle virus genomic RNA	4437	97.826	3040	2949	Negative	2.61e-39
	27																																		TRINITY_DN851_c0_g1_i2	392	NC_003627.1 Maize chlorotic mottle virus genomic RNA	4437	94.203	3652	3720	Positive	1.23e-22
	27																																		TRINITY_DN1823_c0_g1_i1	387	NC_003627.1 Maize chlorotic mottle virus genomic RNA	4437	98.361	922	862	Negative	9.36e-24
	27																																		TRINITY_DN1298_c0_g1_i1	379	NC_003627.1 Maize chlorotic mottle virus genomic RNA	4437	95.745	3467	3513	Positive	2.58e-14
	27																																		TRINITY_DN6680_c0_g1_i1	378	NC_003627.1 Maize chlorotic mottle virus genomic RNA	4437	92.308	4184	4235	Positive	3.33e-13
	27																																		TRINITY_DN1093_c0_g1_i1	373	NC_003627.1 Maize chlorotic mottle virus genomic RNA	4437	96.078	2692	2793	Positive	1.46e-41
	27																																		TRINITY_DN888_c0_g1_i1	372	NC_003627.1 Maize chlorotic mottle virus genomic RNA	4437	97.143	1439	1473	Positive	2.55e-09
	27																																		TRINITY_DN9071_c0_g1_i1	372	NC_003627.1 Maize chlorotic mottle virus genomic RNA	4437	94.444	70	141	Positive	6.94e-25
	27																																		TRINITY_DN5273_c0_g1_i1	371	NC_003627.1 Maize chlorotic mottle virus genomic RNA	4437	98.039	4152	4051	Negative	6.72e-45
	27																																		TRINITY_DN1316_c0_g1_i2	367	NC_003627.1 Maize chlorotic mottle virus genomic RNA	4437	97.561	949	1029	Positive	3.14e-33
	27																																		TRINITY_DN1355_c12_g1_i12	359	NC_003627.1 Maize chlorotic mottle virus genomic RNA	4437	96.429	4097	4042	Negative	2.42e-19
	27																																		TRINITY_DN1258_c0_g2_i1	359	NC_003627.1 Maize chlorotic mottle virus genomic RNA	4437	98.611	3527	3456	Negative	6.63e-30
	27																																		TRINITY_DN2486_c0_g1_i1	353	NC_003627.1 Maize chlorotic mottle virus genomic RNA	4437	97.561	3169	3209	Positive	1.11e-12
	27																																		TRINITY_DN1396_c2_g2_i4	352	NC_003627.1 Maize chlorotic mottle virus genomic RNA	4437	92.593	920	869	Negative	2.39e-14
	27																																		TRINITY_DN2889_c0_g1_i1	350	NC_003627.1 Maize chlorotic mottle virus genomic RNA	4437	94.231	1259	1309	Positive	6.59e-15
	27																																		TRINITY_DN732_c0_g1_i1	349	NC_003627.1 Maize chlorotic mottle virus genomic RNA	4437	100	1552	1523	Negative	3.08e-08
	27																																		TRINITY_DN5918_c0_g1_i1	348	NC_003627.1 Maize chlorotic mottle virus genomic RNA	4437	96.774	294	355	Positive	1.08e-22
	27																																		TRINITY_DN531_c0_g1_i1	344	NC_003627.1 Maize chlorotic mottle virus genomic RNA	4437	97.345	4282	4394	Positive	2.22e-49
	27																																		TRINITY_DN123_c0_g1_i2	333	NC_003627.1 Maize chlorotic mottle virus genomic RNA	4437	99.065	642	536	Negative	2.14e-49
	27																																		TRINITY_DN1309_c0_g1_i3	329	NC_003627.1 Maize chlorotic mottle virus genomic RNA	4437	95.312	4414	4351	Negative	3.66e-22
	27																																		TRINITY_DN20_c0_g1_i1	326	NC_003627.1 Maize chlorotic mottle virus genomic RNA	4437	100	4184	4220	Positive	3.68e-12
	27																																		TRINITY_DN3231_c0_g1_i1	326	NC_003627.1 Maize chlorotic mottle virus genomic RNA	4437	99.18	908	1029	Positive	3.45e-57
	27																																		TRINITY_DN8626_c0_g1_i1	325	NC_003627.1 Maize chlorotic mottle virus genomic RNA	4437	97.895	4097	4003	Negative	4.55e-41
	27																																		TRINITY_DN1355_c4_g2_i1	325	NC_003627.1 Maize chlorotic mottle virus genomic RNA	4437	94.286	715	646	Negative	2.79e-23
	27																																		TRINITY_DN6439_c0_g1_i1	324	NC_003627.1 Maize chlorotic mottle virus genomic RNA	4437	95.349	2893	3021	Positive	9.6e-53
	27																																		TRINITY_DN2943_c0_g1_i1	324	NC_003627.1 Maize chlorotic mottle virus genomic RNA	4437	100	1554	1526	Negative	1.02e-07
	27																																		TRINITY_DN1200_c0_g3_i1	323	NC_003627.1 Maize chlorotic mottle virus genomic RNA	4437	97.561	2982	3022	Positive	1.01e-12
	27																																		TRINITY_DN1337_c6_g1_i13	323	NC_003627.1 Maize chlorotic mottle virus genomic RNA	4437	95.588	2555	2621	Positive	7.72e-24
	27																																		TRINITY_DN4491_c0_g1_i1	323	NC_003627.1 Maize chlorotic mottle virus genomic RNA	4437	95.413	2690	2797	Positive	2.7e-43
	27																																		TRINITY_DN7651_c0_g1_i1	322	NC_003627.1 Maize chlorotic mottle virus genomic RNA	4437	100	909	879	Negative	7.86e-09
	27																																		TRINITY_DN5711_c0_g1_i1	322	NC_003627.1 Maize chlorotic mottle virus genomic RNA	4437	100	1858	1790	Negative	5.9e-30
	27																																		TRINITY_DN1407_c0_g1_i1	321	NC_003627.1 Maize chlorotic mottle virus genomic RNA	4437	93.162	2110	2225	Positive	9.64e-43
	27																																		TRINITY_DN1391_c7_g2_i14	321	NC_003627.1 Maize chlorotic mottle virus genomic RNA	4437	100	1027	978	Negative	2.15e-19
	27																																		TRINITY_DN1408_c13_g1_i14	320	NC_003627.1 Maize chlorotic mottle virus genomic RNA	4437	96.774	2794	2671	Negative	7.32e-54
	27																																		TRINITY_DN1408_c13_g1_i14	320	NC_003627.1 Maize chlorotic mottle virus genomic RNA	4437	96.721	2792	2671	Negative	9.47e-53
	27																																		TRINITY_DN2875_c0_g1_i1	317	NC_003627.1 Maize chlorotic mottle virus genomic RNA	4437	100	3021	2990	Negative	2.15e-09
	27																																		TRINITY_DN3478_c0_g1_i1	315	NC_003627.1 Maize chlorotic mottle virus genomic RNA	4437	94.444	937	902	Negative	2.76e-08
	27																																		TRINITY_DN1195_c0_g1_i2	314	NC_003627.1 Maize chlorotic mottle virus genomic RNA	4437	100	878	921	Positive	4.54e-16
	27																																		TRINITY_DN5237_c0_g1_i1	314	NC_003627.1 Maize chlorotic mottle virus genomic RNA	4437	95.652	1363	1454	Positive	4.41e-36
	27																																		TRINITY_DN3500_c1_g1_i1	314	NC_003627.1 Maize chlorotic mottle virus genomic RNA	4437	100	603	640	Positive	9.82e-13
	27																																		TRINITY_DN957_c0_g1_i2	313	NC_003627.1 Maize chlorotic mottle virus genomic RNA	4437	100	231	194	Negative	9.79e-13
	27																																		TRINITY_DN6282_c0_g1_i1	313	NC_003627.1 Maize chlorotic mottle virus genomic RNA	4437	95.146	1544	1646	Positive	1.57e-40
	27																																		TRINITY_DN6504_c0_g1_i1	312	NC_003627.1 Maize chlorotic mottle virus genomic RNA	4437	95.522	2430	2364	Negative	7.44e-24
	27																																		TRINITY_DN2284_c0_g1_i1	311	NC_003627.1 Maize chlorotic mottle virus genomic RNA	4437	95.902	1855	1976	Positive	4.27e-51
	27																																		TRINITY_DN3100_c0_g1_i1	310	NC_003627.1 Maize chlorotic mottle virus genomic RNA	4437	97.059	1742	1809	Positive	4.41e-26
	27																																		TRINITY_DN1174_c0_g1_i2	310	NC_003627.1 Maize chlorotic mottle virus genomic RNA	4437	96.429	856	911	Positive	2.07e-19
	27																																		TRINITY_DN2112_c0_g1_i1	309	NC_003627.1 Maize chlorotic mottle virus genomic RNA	4437	98.571	949	1018	Positive	7.31e-29
	27																																		TRINITY_DN3008_c0_g1_i1	308	NC_003627.1 Maize chlorotic mottle virus genomic RNA	4437	100	417	386	Negative	2.08e-09
	27																																		TRINITY_DN6440_c0_g1_i1	307	NC_003627.1 Maize chlorotic mottle virus genomic RNA	4437	100	644	545	Negative	3.28e-47
	27																																		TRINITY_DN1329_c12_g2_i3	307	NC_003627.1 Maize chlorotic mottle virus genomic RNA	4437	100	573	630	Positive	7.31e-24
	27																																		TRINITY_DN5803_c0_g1_i1	307	NC_003627.1 Maize chlorotic mottle virus genomic RNA	4437	100	910	879	Negative	2.08e-09
	27																																		TRINITY_DN7235_c0_g1_i1	305	NC_003627.1 Maize chlorotic mottle virus genomic RNA	4437	97.917	4050	4003	Negative	1.22e-16
	27																																		TRINITY_DN5139_c0_g1_i1	305	NC_003627.1 Maize chlorotic mottle virus genomic RNA	4437	95.588	885	818	Negative	2.02e-24
	27																																		TRINITY_DN3504_c0_g1_i1	301	NC_003627.1 Maize chlorotic mottle virus genomic RNA	4437	95.413	2692	2799	Positive	2.5e-43
	27																																		TRINITY_DN495_c0_g1_i1	299	NC_003627.1 Maize chlorotic mottle virus genomic RNA	4437	96.479	2660	2801	Positive	3.12e-62
	27																																		TRINITY_DN1215_c0_g1_i1	298	NC_003627.1 Maize chlorotic mottle virus genomic RNA	4437	97.458	3262	3379	Positive	3.16e-52
	27																																		TRINITY_DN1954_c0_g1_i1	298	NC_003627.1 Maize chlorotic mottle virus genomic RNA	4437	96	4230	4156	Negative	9.09e-28
	27																																		TRINITY_DN5616_c0_g1_i1	297	NC_003627.1 Maize chlorotic mottle virus genomic RNA	4437	98.148	915	862	Negative	5.49e-20
	27																																		TRINITY_DN1170_c0_g1_i2	296	NC_003627.1 Maize chlorotic mottle virus genomic RNA	4437	96.226	2157	2209	Positive	9.15e-18
	27																																		TRINITY_DN1263_c1_g2_i1	296	NC_003627.1 Maize chlorotic mottle virus genomic RNA	4437	100	921	881	Negative	1.98e-14
	27																																		TRINITY_DN967_c0_g2_i1	295	NC_003627.1 Maize chlorotic mottle virus genomic RNA	4437	92.982	926	813	Negative	4.1e-41
	27																																		TRINITY_DN5250_c0_g1_i1	295	NC_003627.1 Maize chlorotic mottle virus genomic RNA	4437	95.522	4083	4214	Positive	5.19e-55
	27																																		TRINITY_DN7043_c0_g1_i1	295	NC_003627.1 Maize chlorotic mottle virus genomic RNA	4437	96.825	3870	3808	Negative	2.52e-23
	27																																		TRINITY_DN1232_c4_g1_i1	295	NC_003627.1 Maize chlorotic mottle virus genomic RNA	4437	96.591	1071	984	Negative	1.48e-35
	27																																		TRINITY_DN578_c0_g1_i1	295	NC_003627.1 Maize chlorotic mottle virus genomic RNA	4437	95.918	2693	2790	Positive	1.91e-39
	27																																		TRINITY_DN7348_c0_g1_i1	295	NC_003627.1 Maize chlorotic mottle virus genomic RNA	4437	98.182	644	590	Negative	1.52e-20
	27																																		TRINITY_DN1155_c0_g2_i1	294	NC_003627.1 Maize chlorotic mottle virus genomic RNA	4437	97.849	644	552	Negative	5.28e-40
	27																																		TRINITY_DN1192_c0_g2_i1	294	NC_003627.1 Maize chlorotic mottle virus genomic RNA	4437	98.63	1027	955	Negative	1.49e-30
	27																																		TRINITY_DN4456_c0_g1_i1	294	NC_003627.1 Maize chlorotic mottle virus genomic RNA	4437	100	644	610	Negative	4.26e-11
	27																																		TRINITY_DN967_c1_g1_i1	293	NC_003627.1 Maize chlorotic mottle virus genomic RNA	4437	100	918	880	Negative	2.53e-13
	27																																		TRINITY_DN1321_c14_g8_i1	293	NC_003627.1 Maize chlorotic mottle virus genomic RNA	4437	94.805	3074	2999	Negative	3.21e-27
	27																																		TRINITY_DN4837_c0_g1_i1	291	NC_003627.1 Maize chlorotic mottle virus genomic RNA	4437	97.727	2088	2045	Negative	1.95e-14
	27																																		TRINITY_DN2548_c0_g1_i1	291	NC_003627.1 Maize chlorotic mottle virus genomic RNA	4437	97.297	377	413	Positive	1.51e-10
	27																																		TRINITY_DN4354_c0_g1_i1	290	NC_003627.1 Maize chlorotic mottle virus genomic RNA	4437	97.895	4120	4214	Positive	4.02e-41
	27																																		TRINITY_DN2489_c0_g1_i1	290	NC_003627.1 Maize chlorotic mottle virus genomic RNA	4437	95.763	133	17	Negative	2.39e-48
	27																																		TRINITY_DN1216_c0_g1_i1	290	NC_003627.1 Maize chlorotic mottle virus genomic RNA	4437	93.966	2309	2423	Positive	6.68e-44
	27																																		TRINITY_DN7400_c0_g1_i1	290	NC_003627.1 Maize chlorotic mottle virus genomic RNA	4437	98.413	3024	2962	Negative	5.31e-25
	27																																		TRINITY_DN2740_c0_g1_i1	289	NC_003627.1 Maize chlorotic mottle virus genomic RNA	4437	100	989	1026	Positive	8.98e-13
	27																																		TRINITY_DN1337_c5_g1_i1	289	NC_003627.1 Maize chlorotic mottle virus genomic RNA	4437	100	746	787	Positive	5.37e-15
	27																																		TRINITY_DN8189_c0_g1_i1	288	NC_003627.1 Maize chlorotic mottle virus genomic RNA	4437	98.571	818	749	Negative	6.77e-29
	27																																		TRINITY_DN3592_c0_g1_i1	287	NC_003627.1 Maize chlorotic mottle virus genomic RNA	4437	96.97	3679	3647	Negative	2.5e-08
	27																																		TRINITY_DN2497_c0_g1_i1	287	NC_003627.1 Maize chlorotic mottle virus genomic RNA	4437	97.561	871	911	Positive	8.91e-13
	27																																		TRINITY_DN1275_c0_g1_i3	287	NC_003627.1 Maize chlorotic mottle virus genomic RNA	4437	100	1010	904	Negative	3.92e-51
	27																																		TRINITY_DN1366_c6_g1_i3	286	NC_003627.1 Maize chlorotic mottle virus genomic RNA	4437	93.919	3736	3589	Negative	2.32e-58
	27																																		TRINITY_DN6068_c0_g1_i1	286	NC_003627.1 Maize chlorotic mottle virus genomic RNA	4437	98.246	2186	2130	Negative	1.13e-21
	27																																		TRINITY_DN6852_c0_g1_i1	286	NC_003627.1 Maize chlorotic mottle virus genomic RNA	4437	96.97	404	339	Negative	5.23e-25
	27																																		TRINITY_DN1345_c5_g1_i2	285	NC_003627.1 Maize chlorotic mottle virus genomic RNA	4437	97.183	571	501	Negative	8.66e-28
	27																																		TRINITY_DN1355_c8_g1_i1	284	NC_003627.1 Maize chlorotic mottle virus genomic RNA	4437	96.026	887	737	Negative	1.36e-65
	27																																		TRINITY_DN6631_c0_g1_i1	283	NC_003627.1 Maize chlorotic mottle virus genomic RNA	4437	97.368	3717	3681	Negative	1.47e-10
	27																																		TRINITY_DN6094_c0_g1_i1	283	NC_003627.1 Maize chlorotic mottle virus genomic RNA	4437	91.071	2624	2570	Negative	6.79e-14
	27																																		TRINITY_DN4111_c0_g1_i1	282	NC_003627.1 Maize chlorotic mottle virus genomic RNA	4437	94.34	2378	2273	Negative	1.4e-40
	27																																		TRINITY_DN1388_c12_g1_i3	282	NC_003627.1 Maize chlorotic mottle virus genomic RNA	4437	92.857	2793	2668	Negative	1.08e-46
	27																																		TRINITY_DN8313_c0_g1_i1	280	NC_003627.1 Maize chlorotic mottle virus genomic RNA	4437	98.876	2961	3049	Positive	1.8e-39
	27																																		TRINITY_DN3511_c0_g1_i1	280	NC_003627.1 Maize chlorotic mottle virus genomic RNA	4437	95.652	1347	1302	Negative	6.71e-14
	27																																		TRINITY_DN6278_c0_g1_i1	279	NC_003627.1 Maize chlorotic mottle virus genomic RNA	4437	96.154	1829	1880	Positive	3.09e-17
	27																																		TRINITY_DN3567_c0_g1_i1	278	NC_003627.1 Maize chlorotic mottle virus genomic RNA	4437	97.015	788	722	Negative	5.07e-25
	27																																		TRINITY_DN1408_c13_g5_i1	277	NC_003627.1 Maize chlorotic mottle virus genomic RNA	4437	95.775	2082	2013	Negative	1.41e-25
	27																																		TRINITY_DN1138_c2_g1_i1	276	NC_003627.1 Maize chlorotic mottle virus genomic RNA	4437	95.349	2628	2501	Negative	8.07e-53
	27																																		TRINITY_DN3316_c0_g1_i1	276	NC_003627.1 Maize chlorotic mottle virus genomic RNA	4437	96.386	3709	3627	Negative	8.31e-33
	27																																		TRINITY_DN1277_c1_g3_i1	276	NC_003627.1 Maize chlorotic mottle virus genomic RNA	4437	93.827	1829	1908	Positive	8.37e-28
	27																																		TRINITY_DN8318_c0_g1_i1	274	NC_003627.1 Maize chlorotic mottle virus genomic RNA	4437	95.181	1381	1462	Positive	1.38e-30
	27																																		TRINITY_DN4367_c0_g1_i1	273	NC_003627.1 Maize chlorotic mottle virus genomic RNA	4437	95.652	1958	1913	Negative	6.53e-14
	27																																		TRINITY_DN1371_c3_g1_i4	273	NC_003627.1 Maize chlorotic mottle virus genomic RNA	4437	95.714	1707	1638	Negative	1.38e-25
	27																																		TRINITY_DN5845_c0_g1_i1	273	NC_003627.1 Maize chlorotic mottle virus genomic RNA	4437	95.238	1810	1769	Negative	1.09e-11
	27																																		TRINITY_DN1396_c0_g1_i1	272	NC_003627.1 Maize chlorotic mottle virus genomic RNA	4437	96.907	3535	3439	Negative	4.85e-40
	27																																		TRINITY_DN1324_c4_g1_i1	272	NC_003627.1 Maize chlorotic mottle virus genomic RNA	4437	96.667	84	143	Positive	1.07e-21
	27																																		TRINITY_DN444_c0_g1_i1	271	NC_003627.1 Maize chlorotic mottle virus genomic RNA	4437	100	1859	1824	Negative	1.08e-11
	27																																		TRINITY_DN1113_c1_g1_i1	270	NC_003627.1 Maize chlorotic mottle virus genomic RNA	4437	93.846	2790	2854	Positive	3.83e-21
	27																																		TRINITY_DN8425_c0_g1_i1	270	NC_003627.1 Maize chlorotic mottle virus genomic RNA	4437	97.531	275	355	Positive	2.25e-33
	27																																		TRINITY_DN4867_c0_g1_i1	269	NC_003627.1 Maize chlorotic mottle virus genomic RNA	4437	98.571	2962	3031	Positive	6.29e-29
	27																																		TRINITY_DN1261_c1_g1_i1	269	NC_003627.1 Maize chlorotic mottle virus genomic RNA	4437	100	1583	1543	Negative	1.79e-14
	27																																		TRINITY_DN1868_c0_g1_i1	268	NC_003627.1 Maize chlorotic mottle virus genomic RNA	4437	97.917	963	1010	Positive	1.06e-16
	27																																		TRINITY_DN1366_c6_g3_i1	268	NC_003627.1 Maize chlorotic mottle virus genomic RNA	4437	98.438	3714	3651	Negative	1.36e-25
	27																																		TRINITY_DN8246_c0_g1_i1	266	NC_003627.1 Maize chlorotic mottle virus genomic RNA	4437	98.876	2737	2649	Negative	1.7e-39
	27																																		TRINITY_DN1386_c4_g4_i2	264	NC_003627.1 Maize chlorotic mottle virus genomic RNA	4437	97.436	1730	1807	Positive	1.02e-31
	27																																		TRINITY_DN129_c0_g1_i1	264	NC_003627.1 Maize chlorotic mottle virus genomic RNA	4437	100	573	644	Positive	1.02e-31
	27																																		TRINITY_DN8036_c0_g1_i1	264	NC_003627.1 Maize chlorotic mottle virus genomic RNA	4437	97.5	921	842	Negative	7.91e-33
	27																																		TRINITY_DN1129_c2_g1_i1	263	NC_003627.1 Maize chlorotic mottle virus genomic RNA	4437	93.966	1736	1621	Negative	1.67e-44
	27																																		TRINITY_DN1348_c5_g1_i21	263	NC_003627.1 Maize chlorotic mottle virus genomic RNA	4437	97.345	14	126	Positive	1.66e-49
	27																																		TRINITY_DN2140_c0_g1_i1	261	NC_003627.1 Maize chlorotic mottle virus genomic RNA	4437	97.727	3745	3702	Negative	1.73e-14
	27																																		TRINITY_DN5669_c0_g1_i1	261	NC_003627.1 Maize chlorotic mottle virus genomic RNA	4437	95.745	265	311	Positive	1.73e-14
	27																																		TRINITY_DN1408_c13_g1_i12	260	NC_003627.1 Maize chlorotic mottle virus genomic RNA	4437	98.913	3043	2952	Negative	3.57e-41
	27																																		TRINITY_DN1408_c13_g1_i16	260	NC_003627.1 Maize chlorotic mottle virus genomic RNA	4437	96.296	2083	2003	Negative	1.01e-31
	27																																		TRINITY_DN3281_c0_g1_i1	260	NC_003627.1 Maize chlorotic mottle virus genomic RNA	4437	96.552	1829	1886	Positive	1.32e-20
	27																																		TRINITY_DN8056_c0_g1_i1	257	NC_003627.1 Maize chlorotic mottle virus genomic RNA	4437	100	1495	1446	Negative	1.69e-19
	27																																		TRINITY_DN7623_c0_g1_i1	256	NC_003627.1 Maize chlorotic mottle virus genomic RNA	4437	100	1781	1809	Positive	7.93e-08
	27																																		TRINITY_DN1366_c6_g1_i5	256	NC_003627.1 Maize chlorotic mottle virus genomic RNA	4437	95.105	3731	3589	Negative	1.59e-59
	27																																		TRINITY_DN1355_c8_g1_i2	256	NC_003627.1 Maize chlorotic mottle virus genomic RNA	4437	97.11	909	737	Negative	1.54e-79
	27																																		TRINITY_DN4983_c0_g1_i1	256	NC_003627.1 Maize chlorotic mottle virus genomic RNA	4437	90.698	1550	1508	Negative	2.2e-08
	27																																		TRINITY_DN7844_c0_g1_i1	256	NC_003627.1 Maize chlorotic mottle virus genomic RNA	4437	97.436	1558	1635	Positive	9.9e-32
	27																																		TRINITY_DN2269_c0_g1_i1	255	NC_003627.1 Maize chlorotic mottle virus genomic RNA	4437	98.551	3038	2970	Negative	2.13e-28
	27																																		TRINITY_DN7172_c0_g1_i1	255	NC_003627.1 Maize chlorotic mottle virus genomic RNA	4437	100	3038	2991	Negative	2.16e-18
	27																																		TRINITY_DN1275_c0_g1_i2	255	NC_003627.1 Maize chlorotic mottle virus genomic RNA	4437	100	1022	904	Negative	7.35e-58
	27																																		TRINITY_DN5674_c0_g1_i1	254	NC_003627.1 Maize chlorotic mottle virus genomic RNA	4437	97.561	416	376	Negative	7.8e-13
	27																																		TRINITY_DN7428_c0_g1_i1	254	NC_003627.1 Maize chlorotic mottle virus genomic RNA	4437	100	1372	1313	Negative	4.6e-25
	27																																		TRINITY_DN1803_c0_g1_i1	253	NC_003627.1 Maize chlorotic mottle virus genomic RNA	4437	97.872	2981	3027	Positive	3.59e-16
	27																																		TRINITY_DN1320_c1_g4_i2	252	NC_003627.1 Maize chlorotic mottle virus genomic RNA	4437	90	3456	3514	Positive	1.66e-14
	27																																		TRINITY_DN9008_c0_g1_i1	252	NC_003627.1 Maize chlorotic mottle virus genomic RNA	4437	92.857	4235	4180	Negative	3.57e-16
	27																																		TRINITY_DN6929_c0_g1_i1	251	NC_003627.1 Maize chlorotic mottle virus genomic RNA	4437	97.5	376	415	Positive	2.77e-12
	27																																		TRINITY_DN5968_c0_g1_i1	250	NC_003627.1 Maize chlorotic mottle virus genomic RNA	4437	95.652	651	583	Negative	4.52e-25
	27																																		TRINITY_DN1408_c13_g1_i10	250	NC_003627.1 Maize chlorotic mottle virus genomic RNA	4437	96	1978	1904	Negative	2.09e-28
	27																																		TRINITY_DN3773_c0_g1_i1	250	NC_003627.1 Maize chlorotic mottle virus genomic RNA	4437	97.368	3744	3707	Negative	3.57e-11
	27																																		TRINITY_DN1355_c8_g2_i1	250	NC_003627.1 Maize chlorotic mottle virus genomic RNA	4437	96.203	815	737	Negative	1.25e-30
	27																																		TRINITY_DN4021_c0_g1_i1	249	NC_003627.1 Maize chlorotic mottle virus genomic RNA	4437	95.833	1033	986	Negative	4.56e-15
	27																																		TRINITY_DN1275_c0_g1_i7	249	NC_003627.1 Maize chlorotic mottle virus genomic RNA	4437	100	1025	904	Negative	1.54e-59
	27																																		TRINITY_DN1155_c0_g1_i1	248	NC_003627.1 Maize chlorotic mottle virus genomic RNA	4437	99.065	658	552	Negative	1.56e-49
	27																																		TRINITY_DN1155_c1_g2_i1	248	NC_003627.1 Maize chlorotic mottle virus genomic RNA	4437	93.976	570	490	Negative	5.75e-29
	27																																		TRINITY_DN1275_c0_g1_i6	248	NC_003627.1 Maize chlorotic mottle virus genomic RNA	4437	100	1024	904	Negative	5.51e-59
	27																																		TRINITY_DN1347_c3_g1_i1	247	NC_003627.1 Maize chlorotic mottle virus genomic RNA	4437	100	1023	927	Negative	1.21e-45
	27																																		TRINITY_DN1366_c6_g1_i4	247	NC_003627.1 Maize chlorotic mottle virus genomic RNA	4437	97.351	4226	4076	Negative	1.95e-68
	27																																		TRINITY_DN3745_c0_g1_i1	246	NC_003627.1 Maize chlorotic mottle virus genomic RNA	4437	98.039	3480	3530	Positive	2.08e-18
	27																																		TRINITY_DN6316_c1_g1_i1	246	NC_003627.1 Maize chlorotic mottle virus genomic RNA	4437	97.059	1839	1940	Positive	2.01e-43
	27																																		TRINITY_DN732_c1_g1_i1	246	NC_003627.1 Maize chlorotic mottle virus genomic RNA	4437	100	1539	1508	Negative	1.63e-09
	27																																		TRINITY_DN3063_c0_g1_i1	245	NC_003627.1 Maize chlorotic mottle virus genomic RNA	4437	100	4399	4350	Negative	1.6e-19
	27																																		TRINITY_DN1140_c1_g1_i1	245	NC_003627.1 Maize chlorotic mottle virus genomic RNA	4437	96.97	1543	1641	Positive	9.3e-42
	27																																		TRINITY_DN7171_c0_g1_i1	245	NC_003627.1 Maize chlorotic mottle virus genomic RNA	4437	95.556	1023	980	Negative	7.5e-13
	27																																		TRINITY_DN1366_c6_g2_i1	245	NC_003627.1 Maize chlorotic mottle virus genomic RNA	4437	97.468	4153	4076	Negative	9.43e-32
	27																																		TRINITY_DN18_c0_g2_i1	245	NC_003627.1 Maize chlorotic mottle virus genomic RNA	4437	100	4175	4226	Positive	1.24e-20
	27																																		TRINITY_DN1265_c0_g4_i1	244	NC_003627.1 Maize chlorotic mottle virus genomic RNA	4437	94.697	1603	1734	Positive	1.96e-53
	27																																		TRINITY_DN1408_c13_g4_i1	243	NC_003627.1 Maize chlorotic mottle virus genomic RNA	4437	96.721	2248	2188	Negative	2.64e-22
	27																																		TRINITY_DN2557_c0_g1_i1	243	NC_003627.1 Maize chlorotic mottle virus genomic RNA	4437	100	1536	1507	Negative	2.08e-08
	27																																		TRINITY_DN5323_c0_g1_i1	243	NC_003627.1 Maize chlorotic mottle virus genomic RNA	4437	100	1344	1372	Positive	7.49e-08
	27																																		TRINITY_DN403_c0_g1_i1	242	NC_003627.1 Maize chlorotic mottle virus genomic RNA	4437	100	3424	3380	Negative	9.51e-17
	27																																		TRINITY_DN1380_c5_g2_i1	242	NC_003627.1 Maize chlorotic mottle virus genomic RNA	4437	96	4288	4337	Positive	3.42e-16
	27																																		TRINITY_DN1290_c4_g3_i2	242	NC_003627.1 Maize chlorotic mottle virus genomic RNA	4437	95.294	1611	1695	Positive	2.59e-32
	27																																		TRINITY_DN979_c0_g1_i1	241	NC_003627.1 Maize chlorotic mottle virus genomic RNA	4437	94.915	2192	2250	Positive	1.57e-19
	27																																		TRINITY_DN2387_c0_g1_i1	241	NC_003627.1 Maize chlorotic mottle virus genomic RNA	4437	97.561	4232	4192	Negative	2.65e-12
	27																																		TRINITY_DN6369_c0_g1_i1	241	NC_003627.1 Maize chlorotic mottle virus genomic RNA	4437	100	1550	1515	Negative	9.53e-12
	27																																		TRINITY_DN1388_c16_g1_i5	240	NC_003627.1 Maize chlorotic mottle virus genomic RNA	4437	97.674	1035	907	Negative	6.88e-58
	27																																		TRINITY_DN638_c0_g2_i1	240	NC_003627.1 Maize chlorotic mottle virus genomic RNA	4437	96.667	4063	3974	Negative	3.29e-36
	27																																		TRINITY_DN1403_c5_g1_i9	239	NC_003627.1 Maize chlorotic mottle virus genomic RNA	4437	100	3357	3390	Positive	1.22e-10
	27																																		TRINITY_DN8690_c0_g1_i1	237	NC_003627.1 Maize chlorotic mottle virus genomic RNA	4437	95.062	837	917	Positive	4.23e-30
	27																																		TRINITY_DN1343_c18_g1_i1	237	NC_003627.1 Maize chlorotic mottle virus genomic RNA	4437	98.551	3535	3467	Negative	1.97e-28
	27																																		TRINITY_DN5106_c0_g1_i1	237	NC_003627.1 Maize chlorotic mottle virus genomic RNA	4437	100	3421	3365	Negative	1.98e-23
	27																																		TRINITY_DN357_c0_g1_i1	236	NC_003627.1 Maize chlorotic mottle virus genomic RNA	4437	96	4179	4226	Positive	1.2e-15
	27																																		TRINITY_DN3760_c0_g1_i1	235	NC_003627.1 Maize chlorotic mottle virus genomic RNA	4437	100	2290	2320	Positive	5.58e-09
	27																																		TRINITY_DN3452_c0_g1_i1	235	NC_003627.1 Maize chlorotic mottle virus genomic RNA	4437	100	915	879	Negative	2.58e-12
	27																																		TRINITY_DN222_c0_g1_i1	234	NC_003627.1 Maize chlorotic mottle virus genomic RNA	4437	97.872	656	610	Negative	3.29e-16
	27																																		TRINITY_DN1408_c13_g1_i18	233	NC_003627.1 Maize chlorotic mottle virus genomic RNA	4437	96.078	1884	1784	Negative	3.17e-41
	27																																		TRINITY_DN1408_c13_g1_i11	232	NC_003627.1 Maize chlorotic mottle virus genomic RNA	4437	94.702	2211	2061	Negative	2.37e-62
	27																																		TRINITY_DN1386_c4_g4_i1	232	NC_003627.1 Maize chlorotic mottle virus genomic RNA	4437	96.341	1730	1811	Positive	2.47e-32
	27																																		TRINITY_DN1403_c15_g1_i1	231	NC_003627.1 Maize chlorotic mottle virus genomic RNA	4437	96.226	2208	2156	Negative	6.98e-18
	27																																		TRINITY_DN1275_c0_g1_i8	231	NC_003627.1 Maize chlorotic mottle virus genomic RNA	4437	100	1023	904	Negative	1.83e-58
	27																																		TRINITY_DN221_c0_g1_i2	230	NC_003627.1 Maize chlorotic mottle virus genomic RNA	4437	93.939	1573	1509	Negative	3.21e-21
	27																																		TRINITY_DN1365_c6_g4_i1	228	NC_003627.1 Maize chlorotic mottle virus genomic RNA	4437	100	2488	2447	Negative	4.14e-15
	27																																		TRINITY_DN2410_c0_g1_i1	227	NC_003627.1 Maize chlorotic mottle virus genomic RNA	4437	96.667	3705	3646	Negative	8.8e-22
	27																																		TRINITY_DN1380_c1_g1_i1	227	NC_003627.1 Maize chlorotic mottle virus genomic RNA	4437	98.113	4161	4213	Positive	1.47e-19
	27																																		TRINITY_DN18_c0_g1_i1	226	NC_003627.1 Maize chlorotic mottle virus genomic RNA	4437	100	4175	4231	Positive	1.88e-23
	27																																		TRINITY_DN1211_c0_g3_i1	224	NC_003627.1 Maize chlorotic mottle virus genomic RNA	4437	98.113	867	919	Positive	1.45e-19
	27																																		TRINITY_DN1376_c0_g2_i1	223	NC_003627.1 Maize chlorotic mottle virus genomic RNA	4437	92.742	1615	1738	Positive	3.87e-45
	27																																		TRINITY_DN1408_c13_g1_i22	222	NC_003627.1 Maize chlorotic mottle virus genomic RNA	4437	98.077	1955	1904	Negative	5.16e-19
	27																																		TRINITY_DN1752_c0_g1_i1	222	NC_003627.1 Maize chlorotic mottle virus genomic RNA	4437	97.436	913	875	Negative	8.7e-12
	27																																		TRINITY_DN1408_c13_g1_i15	219	NC_003627.1 Maize chlorotic mottle virus genomic RNA	4437	93.296	1961	1784	Negative	1.32e-69
	27																																		TRINITY_DN7448_c0_g1_i1	219	NC_003627.1 Maize chlorotic mottle virus genomic RNA	4437	100	3014	3053	Positive	5.12e-14
	27																																		TRINITY_DN1362_c1_g2_i1	219	NC_003627.1 Maize chlorotic mottle virus genomic RNA	4437	96.226	856	908	Positive	6.58e-18
	27																																		TRINITY_DN700_c0_g1_i1	218	NC_003627.1 Maize chlorotic mottle virus genomic RNA	4437	100	2832	2859	Positive	2.39e-07
	27																																		TRINITY_DN1351_c2_g12_i1	215	NC_003627.1 Maize chlorotic mottle virus genomic RNA	4437	95.181	2717	2799	Positive	2.94e-31
	27																																		TRINITY_DN1366_c6_g1_i1	215	NC_003627.1 Maize chlorotic mottle virus genomic RNA	4437	97.778	4209	4076	Negative	2.81e-61
	27																																		TRINITY_DN8133_c0_g1_i1	214	NC_003627.1 Maize chlorotic mottle virus genomic RNA	4437	97.143	878	912	Positive	1.4e-09
	27																																		TRINITY_DN1275_c0_g1_i4	214	NC_003627.1 Maize chlorotic mottle virus genomic RNA	4437	100	1018	904	Negative	1.01e-55
	27																																		TRINITY_DN1396_c0_g1_i2	212	NC_003627.1 Maize chlorotic mottle virus genomic RNA	4437	97.196	3545	3439	Negative	1.02e-45
	27																																		TRINITY_DN1350_c3_g7_i1	212	NC_003627.1 Maize chlorotic mottle virus genomic RNA	4437	96.262	813	919	Positive	4.74e-44
	27																																		TRINITY_DN1408_c13_g1_i7	208	NC_003627.1 Maize chlorotic mottle virus genomic RNA	4437	95.946	3137	3064	Negative	6.13e-28
	27																																		TRINITY_DN1329_c20_g1_i1	208	NC_003627.1 Maize chlorotic mottle virus genomic RNA	4437	96.053	1828	1903	Positive	4.74e-29
	27																																		TRINITY_DN1275_c0_g1_i5	208	NC_003627.1 Maize chlorotic mottle virus genomic RNA	4437	96.923	1031	904	Negative	7.59e-57
	27																																		TRINITY_DN1193_c1_g1_i1	207	NC_003627.1 Maize chlorotic mottle virus genomic RNA	4437	92.647	2249	2316	Positive	2.85e-21
	27																																		TRINITY_DN6037_c0_g1_i1	207	NC_003627.1 Maize chlorotic mottle virus genomic RNA	4437	93.75	926	879	Negative	1.73e-13
	27																																		TRINITY_DN2066_c0_g1_i1	206	NC_003627.1 Maize chlorotic mottle virus genomic RNA	4437	90.476	1548	1508	Negative	6.23e-08
	27																																		TRINITY_DN7431_c0_g1_i1	205	NC_003627.1 Maize chlorotic mottle virus genomic RNA	4437	100	1535	1508	Negative	2.23e-07
	27																																		TRINITY_DN1388_c16_g1_i3	205	NC_003627.1 Maize chlorotic mottle virus genomic RNA	4437	95.968	923	800	Negative	2.09e-52
	27																																		TRINITY_DN548_c0_g3_i1	205	NC_003627.1 Maize chlorotic mottle virus genomic RNA	4437	97.674	879	920	Positive	1.71e-13
	27																																		TRINITY_DN1388_c16_g1_i4	202	NC_003627.1 Maize chlorotic mottle virus genomic RNA	4437	97.917	231	184	Negative	7.78e-17
									Maize yellow dwarf virus-RMV2									Sugarcane mosaic virus									Maize streak virus								Maize Chlorotic mottle virus									NC_032912.1 Hubei Poty-like virus 1 strain SCM51506 polyprotein gene
Researcher	Sample	Host	Total	Total	Unique_Contigs	Total	Contigs	Contig	Contig	Reference	Reference	%	Coordinates		Polarity	E	Contig	Conting	Reference	Reference	%	Coordinates		Polarity	E	Conting	Conting	Reference	Reference	%	Coordinates		Polarity	E	Conting	Conting	Reference	Reference	%	Coordinates		Polarity	E	Conting	Conting	Reference	Reference	%	Coordinates
		Maize Leaf	Sequences	Contigs	matching to Virus	virus	Unmatch_to _PVGDB/NCBI		Length		Length	identity	Start	End		value		Length		Length	identity	Start	End		value		Length		Length	identity	Start	End		value		Length		Length	identity	Start	End		value		Length		Length	identity	Start
	28		915620	8441	48	7	3238	TRINITY_DN2965_c0_g1_i1	335	NC_003377.1 Maize dwarf mosaic virus	9515	81.493	9109	8775	Negative	2.08e-74	TRINITY_DN3999_c0_g1_i1	579	NC_003398.1 Sugarcane mosaic virus	9596	82.609	2234	2808	Positive	1.2e-143	TRINITY_DN1067_c8_g1_i11	1801	NC_001346.2 Maize streak virus - A[Ama]	2689	97.733	1	1588	Positive	0	TRINITY_DN1028_c1_g1_i2	4399	NC_003627.1 Maize chlorotic mottle virus genomic RNA	4437	96.681	4412	14	Negative	0	TRINITY_DN3532_c0_g1_i1	221	NC_032912.1 Hubei Poty-like virus 1 strain SCM51506 polyprotein gene	9356	85.388	1970
	28																TRINITY_DN2758_c0_g1_i1	412	NC_003398.1 Sugarcane mosaic virus	9596	76.57	2896	3304	Positive	4.43e-57	TRINITY_DN1067_c8_g1_i22	1724	NC_001346.2 Maize streak virus - A[Ama]	2689	97.661	1	1582	Positive	0	TRINITY_DN1028_c1_g1_i1	3140	NC_003627.1 Maize chlorotic mottle virus genomic RNA	4437	96.525	3035	14	Negative	0
	28																TRINITY_DN5072_c0_g1_i1	292	NC_003398.1 Sugarcane mosaic virus	9596	91.724	5479	5190	Negative	7.88e-113	TRINITY_DN1067_c8_g1_i13	1634	NC_001346.2 Maize streak virus - A[Ama]	2689	97.657	1	1323	Positive	0	TRINITY_DN1028_c1_g1_i3	1945	NC_003627.1 Maize chlorotic mottle virus genomic RNA	4437	96.811	1863	14	Negative	0
	28																									TRINITY_DN1067_c8_g1_i15	1535	NC_001346.2 Maize streak virus - A[Ama]	2689	97.414	1	1315	Positive	0
	28																									TRINITY_DN1061_c3_g1_i23	1478	NC_001346.2 Maize streak virus - A[Ama]	2689	98.276	1296	1353	Positive	1.73e-21
	28																									TRINITY_DN1067_c8_g1_i8	1201	NC_001346.2 Maize streak virus - A[Ama]	2689	97.507	1	1043	Positive	0
	28																									TRINITY_DN1067_c8_g1_i16	1004	NC_001346.2 Maize streak virus - A[Ama]	2689	98.824	824	1588	Positive	0
	28																									TRINITY_DN1067_c8_g1_i6	807	NC_001346.2 Maize streak virus - A[Ama]	2689	96.871	1640	2374	Positive	0
	28																									TRINITY_DN1067_c8_g1_i12	785	NC_001346.2 Maize streak virus - A[Ama]	2689	98.598	824	1465	Positive	0
	28																									TRINITY_DN1067_c8_g1_i14	756	NC_001346.2 Maize streak virus - A[Ama]	2689	96.825	1640	2395	Positive	0
	28																									TRINITY_DN1067_c8_g8_i1	671	NC_001346.2 Maize streak virus - A[Ama]	2689	100	1611	1564	Negative	6.02e-18
	28																									TRINITY_DN1067_c8_g1_i18	611	NC_001346.2 Maize streak virus - A[Ama]	2689	98.515	1062	1465	Positive	0
	28																									TRINITY_DN1067_c8_g1_i4	484	NC_001346.2 Maize streak virus - A[Ama]	2689	97.442	1640	2030	Positive	0
	28																									TRINITY_DN1067_c8_g1_i3	423	NC_001346.2 Maize streak virus - A[Ama]	2689	94.85	381	613	Positive	5.53e-101
	28																									TRINITY_DN1067_c11_g1_i1	327	NC_001346.2 Maize streak virus - A[Ama]	2689	95	2584	2505	Negative	2.16e-29
	28																									TRINITY_DN1611_c0_g1_i1	317	NC_001346.2 Maize streak virus - A[Ama]	2689	96.842	2524	2430	Negative	2.06e-39
	28																									TRINITY_DN1067_c8_g1_i5	314	NC_001346.2 Maize streak virus - A[Ama]	2689	97.059	1	170	Positive	8.96e-78
	28																									TRINITY_DN1067_c8_g1_i17	314	NC_001346.2 Maize streak virus - A[Ama]	2689	94.964	1820	1958	Positive	3.32e-57
	28																									TRINITY_DN1067_c8_g1_i21	307	NC_001346.2 Maize streak virus - A[Ama]	2689	97.861	1279	1465	Positive	6.67e-89
	28																									TRINITY_DN1155_c0_g1_i1	298	NC_001346.2 Maize streak virus - A[Ama]	2689	100	1309	1340	Positive	2.01e-09
	28																									TRINITY_DN1067_c8_g1_i20	286	NC_001346.2 Maize streak virus - A[Ama]	2689	98.235	1296	1465	Positive	3.74e-81
	28																									TRINITY_DN2114_c0_g1_i1	285	NC_001346.2 Maize streak virus - A[Ama]	2689	100	2524	2481	Negative	4.09e-16
	28																									TRINITY_DN1067_c8_g1_i10	285	NC_001346.2 Maize streak virus - A[Ama]	2689	96.899	1820	1948	Positive	1.07e-56
	28																									TRINITY_DN3770_c0_g1_i1	271	NC_001346.2 Maize streak virus - A[Ama]	2689	100	1291	1326	Positive	1.08e-11
	28																									TRINITY_DN1067_c8_g1_i7	267	NC_001346.2 Maize streak virus - A[Ama]	2689	97.368	1276	1465	Positive	5.73e-89
	28																									TRINITY_DN1067_c8_g2_i3	263	NC_001346.2 Maize streak virus - A[Ama]	2689	94.34	2635	2371	Negative	1.96e-113
	28																									TRINITY_DN1067_c8_g1_i19	261	NC_001346.2 Maize streak virus - A[Ama]	2689	98.286	1291	1465	Positive	5.63e-84
	28																									TRINITY_DN219_c0_g1_i1	260	NC_001346.2 Maize streak virus - A[Ama]	2689	95.522	592	658	Positive	6.1e-24
	28																									TRINITY_DN1067_c8_g2_i2	251	NC_001346.2 Maize streak virus - A[Ama]	2689	91.262	2600	2498	Negative	2.08e-33
	28																									TRINITY_DN1067_c8_g2_i1	242	NC_001346.2 Maize streak virus - A[Ama]	2689	91.736	2618	2498	Negative	9.18e-42
	28																									TRINITY_DN177_c0_g1_i1	227	NC_001346.2 Maize streak virus - A[Ama]	2689	93.548	2430	2520	Positive	6.7e-33
	28																									TRINITY_DN1067_c8_g1_i2	225	NC_001346.2 Maize streak virus - A[Ama]	2689	99.167	643	762	Positive	8.29e-57
	28																									TRINITY_DN1067_c8_g1_i9	218	NC_001346.2 Maize streak virus - A[Ama]	2689	97.521	1640	1760	Positive	4.82e-54
	28																									TRINITY_DN1067_c8_g1_i1	204	NC_001346.2 Maize streak virus - A[Ama]	2689	96.85	1726	1852	Positive	3.46e-55
								NC_033774.1 Pepper chlorotic spot virus isolate 14YV733 segment L							NC_003398.1 Sugarcane mosaic virus										NC_001346.2 Maize streak virus - A[Ama]										NC_003627.1 Maize chlorotic mottle virus genomic RNA									NC_029906.1 Barley virus G isolate Gimje
								Contig	Contig	Reference	Reference	%	Coordinates		Polarity	E	Contig	Conting	Reference	Reference	%	Coordinates		Polarity	E	Conting	Conting	Reference	Reference	%	Coordinates		Polarity	E	Conting	Conting	Reference	Reference	%	Coordinates		Polarity	E	Conting	Conting	Reference	Reference	%	Coordinates
Researcher	Sample	Host	Total	Total	Unique_Contigs	Total	Contigs		Length		Length	identity	Start	End		value		Length		Length	identity	Start	End		value		Length		Length	identity	Start	End		value		Length		Length	identity	Start	End		value		Length		Length	identity	Start
		Maize Leaf	Sequences	Contigs	matching to Virus	virus	Unmatch_to _PVGDB/NCBI	TRINITY_DN1722_c5_g3_i4	269	NC_033774.1 Pepper chlorotic spot virus isolate 14YV733 segment L	8913	90	8856	8913	Positive	1.79e-14	TRINITY_DN2702_c0_g1_i1	216	NC_003398.1 Sugarcane mosaic virus	9596	92.593	5469	5684	Positive	3.53e-85	TRINITY_DN2406_c0_g1_i1	326	NC_001346.2 Maize streak virus - A[Ama]	2689	98.773	328	3	Negative	3.82e-166	TRINITY_DN1471_c0_g1_i1	4405	NC_003627.1 Maize chlorotic mottle virus genomic RNA	4437	96.662	4414	11	Negative	0	TRINITY_DN1580_c0_g1_i1	5494	NC_029906.1 Barley virus G isolate Gimje	5620	82.554	667
	29		695276	17514	22	8	4124										TRINITY_DN300_c0_g1_i1	429	NC_003398.1 Sugarcane mosaic virus	9596	83.738	2782	2371	Negative	9.25e-109	TRINITY_DN7021_c0_g1_i1	328	NC_001346.2 Maize streak virus - A[Ama]	2689	93.704	2689	2420	Negative	8.94e-113
	29																TRINITY_DN7476_c0_g1_i1	218	NC_003398.1 Sugarcane mosaic virus	9596	90.323	5235	5451	Positive	2.16e-77	TRINITY_DN1045_c0_g1_i1	305	NC_001346.2 Maize streak virus - A[Ama]	2689	96.786	748	470	Negative	1.04e-131
	29																TRINITY_DN4941_c0_g1_i1	274	NC_003398.1 Sugarcane mosaic virus	9596	85.401	3282	3555	Positive	2.78e-77	TRINITY_DN1577_c0_g1_i1	1816	NC_001346.2 Maize streak virus - A[Ama]	2689	98.018	763	2578	Positive	0
	29																TRINITY_DN1730_c6_g1_i1	5304	NC_003398.1 Sugarcane mosaic virus	9596	87.539	9579	8613	Negative	0
	29																TRINITY_DN1730_c6_g1_i2	3773	NC_003398.1 Sugarcane mosaic virus	9596	78.122	18	3647	Positive	0
	29																TRINITY_DN1730_c6_g1_i8	4306	NC_003398.1 Sugarcane mosaic virus	9596	78.215	18	4210	Positive	0
	29																TRINITY_DN1730_c6_g1_i10	5055	NC_003398.1 Sugarcane mosaic virus	9596	85	8951	8613	Negative	9.02e-94
	29																TRINITY_DN1730_c6_g1_i12	4308	NC_003398.1 Sugarcane mosaic virus	9596	78.147	18	4325	Positive	0
	29																TRINITY_DN1727_c0_g1_i1	976	NC_003398.1 Sugarcane mosaic virus	9596	79.039	3853	2881	Negative	0
								NC_029990.1 Maize yellow dwarf virus-RMV2									NC_003398.1 Sugarcane mosaic virus									NC_001346.2 Maize streak virus - A[Ama]									NC_003627.1 Maize chlorotic mottle virus genomic RNA									NC_021484.1 Maize yellow dwarf virus-RMV
Researcher	Sample	Host	Total	Total	Unique_Contigs	Total	Contigs	Contig	Contig	Reference	Reference	%	Coordinates		Polarity	E	Contig	Conting	Reference	Reference	%	Coordinates		Polarity	E	Conting	Conting	Reference	Reference	%	Coordinates		Polarity	E	Conting	Conting	Reference	Reference	%	Coordinates		Polarity	E	Conting	Conting	Reference	Reference	%	Coordinates
		Maize Leaf	Sequences	Contigs	matching to Virus	virus	Unmatch_to _PVGDB/NCBI		Length		Length	identity	Start	End		value		Length		Length	identity	Start	End		value		Length		Length	identity	Start	End		value		Length		Length	identity	Start	End		value		Length		Length	identity	Start
	30		872896	50314	365	9	14032	TRINITY_DN19173_c0_g1_i1	239	NC_029990.1 Maize yellow dwarf virus-RMV2	5625	97.49	5119	5357	Positive	1.36e-114	TRINITY_DN18065_c0_g1_i1	421	NC_003398.1 Sugarcane mosaic virus	9596	90.431	6441	6858	Positive	3.93e-157	TRINITY_DN23067_c0_g1_i2	241	NC_001346.2 Maize streak virus - A[Ama]	2689	97.674	1261	1303	Positive	5.7e-14	TRINITY_DN4619_c7_g1_i1	294	NC_003627.1 Maize chlorotic mottle virus genomic RNA	4437	96.078	1836	2039	Positive	1.06e-91	TRINITY_DN28425_c0_g1_i1	398	NC_021484.1 Maize yellow dwarf virus-RMV	5612	81.955	1313
	30							TRINITY_DN6930_c0_g1_i1	346	NC_029990.1 Maize yellow dwarf virus-RMV2	5625	95.665	1097	1442	Positive	6.86e-159	TRINITY_DN12178_c0_g1_i1	288	NC_003398.1 Sugarcane mosaic virus	9596	91.319	1132	1419	Positive	4.67e-110	TRINITY_DN18758_c0_g1_i1	442	NC_001346.2 Maize streak virus - A[Ama]	2689	97.917	413	318	Negative	1.75e-41	TRINITY_DN4619_c7_g1_i2	806	NC_003627.1 Maize chlorotic mottle virus genomic RNA	4437	96.988	2	665	Positive	0
	30							TRINITY_DN12274_c0_g1_i1	485	NC_029990.1 Maize yellow dwarf virus-RMV2	5625	95.464	4654	5138	Positive	0	TRINITY_DN17875_c0_g1_i1	501	NC_003398.1 Sugarcane mosaic virus	9596	80.079	3310	2810	Negative	1.83e-101	TRINITY_DN931_c0_g1_i2	272	NC_001346.2 Maize streak virus - A[Ama]	2689	98.113	1284	1336	Positive	1.79e-19	TRINITY_DN4619_c7_g1_i3	4412	NC_003627.1 Maize chlorotic mottle virus genomic RNA	4437	96.735	2	4412	Positive	0
	30							TRINITY_DN10563_c0_g1_i1	230	NC_029990.1 Maize yellow dwarf virus-RMV2	5625	96.957	839	1068	Positive	6.12e-108										TRINITY_DN933_c0_g1_i1	592	NC_001346.2 Maize streak virus - A[Ama]	2689	94.444	2524	2435	Negative	5.17e-33	TRINITY_DN4619_c7_g1_i4	2523	NC_003627.1 Maize chlorotic mottle virus genomic RNA	4437	96.415	2	2427	Positive	0
	30							TRINITY_DN14113_c0_g1_i1	568	NC_029990.1 Maize yellow dwarf virus-RMV2	5625	93.486	4667	4103	Negative	0										TRINITY_DN13788_c0_g1_i1	305	NC_001346.2 Maize streak virus - A[Ama]	2689	98.78	1237	1318	Positive	1.54e-35
	30							TRINITY_DN8265_c0_g1_i1	261	NC_029990.1 Maize yellow dwarf virus-RMV2	5625	97.318	85	345	Positive	4.11e-125										TRINITY_DN13768_c0_g1_i1	261	NC_001346.2 Maize streak virus - A[Ama]	2689	98.81	219	302	Positive	3.61e-36
	30																									TRINITY_DN19544_c0_g1_i1	424	NC_001346.2 Maize streak virus - A[Ama]	2689	98.246	1823	1879	Positive	1.72e-21
	30																									TRINITY_DN18567_c0_g1_i1	276	NC_001346.2 Maize streak virus - A[Ama]	2689	98.901	2435	2525	Positive	1.37e-40
	30																									TRINITY_DN18579_c0_g1_i1	260	NC_001346.2 Maize streak virus - A[Ama]	2689	100	971	1018	Positive	2.21e-18
	30																									TRINITY_DN1464_c0_g1_i2	391	NC_001346.2 Maize streak virus - A[Ama]	2689	97.436	1033	1110	Positive	5.61e-31
	30																									TRINITY_DN1413_c0_g1_i1	410	NC_001346.2 Maize streak virus - A[Ama]	2689	99.18	1216	1337	Positive	1.22e-57
	30																									TRINITY_DN1413_c0_g1_i2	290	NC_001346.2 Maize streak virus - A[Ama]	2689	99.167	1216	1335	Positive	1.09e-56
	30																									TRINITY_DN1448_c0_g1_i1	296	NC_001346.2 Maize streak virus - A[Ama]	2689	95	837	738	Negative	2.47e-38
	30																									TRINITY_DN21117_c0_g1_i1	315	NC_001346.2 Maize streak virus - A[Ama]	2689	96.203	269	191	Negative	5.77e-30
	30																									TRINITY_DN4329_c2_g1_i1	312	NC_001346.2 Maize streak virus - A[Ama]	2689	96.341	1232	1313	Positive	3.41e-32
	30																									TRINITY_DN4358_c4_g1_i11	704	NC_001346.2 Maize streak virus - A[Ama]	2689	94.34	1291	1343	Positive	1.06e-15
	30																									TRINITY_DN4358_c7_g1_i1	208	NC_001346.2 Maize streak virus - A[Ama]	2689	98.876	1409	1321	Negative	1.3e-39
	30																									TRINITY_DN4355_c7_g1_i1	245	NC_001346.2 Maize streak virus - A[Ama]	2689	98.684	1313	1238	Negative	2.62e-32
	30																									TRINITY_DN4380_c3_g1_i1	227	NC_001346.2 Maize streak virus - A[Ama]	2689	91.667	1956	2026	Positive	3.16e-21
	30																									TRINITY_DN4395_c8_g5_i1	237	NC_001346.2 Maize streak virus - A[Ama]	2689	89.474	1269	1325	Positive	7.23e-13
	30																									TRINITY_DN4399_c3_g2_i3	205	NC_001346.2 Maize streak virus - A[Ama]	2689	98.333	706	647	Negative	1.69e-23
	30																									TRINITY_DN4382_c2_g1_i6	227	NC_001346.2 Maize streak virus - A[Ama]	2689	100	394	451	Positive	5.26e-24
	30																									TRINITY_DN4351_c1_g1_i11	564	NC_001346.2 Maize streak virus - A[Ama]	2689	93.22	1289	1347	Positive	6.5e-17
	30																									TRINITY_DN4394_c0_g2_i8	762	NC_001346.2 Maize streak virus - A[Ama]	2689	100	1027	1086	Positive	1.46e-24
	30																									TRINITY_DN2180_c0_g1_i1	359	NC_001346.2 Maize streak virus - A[Ama]	2689	98.851	2435	2521	Positive	3.04e-38
	30																									TRINITY_DN2120_c0_g1_i3	234	NC_001346.2 Maize streak virus - A[Ama]	2689	96.296	2510	2430	Negative	8.97e-32
	30																									TRINITY_DN2159_c0_g1_i1	234	NC_001346.2 Maize streak virus - A[Ama]	2689	95.385	67	3	Negative	7.03e-23
	30																									TRINITY_DN4819_c30_g2_i1	219	NC_001346.2 Maize streak virus - A[Ama]	2689	97	792	693	Negative	2.28e-42
	30																									TRINITY_DN4808_c14_g4_i3	239	NC_001346.2 Maize streak virus - A[Ama]	2689	96.396	2413	2523	Positive	8.99e-47
	30																									TRINITY_DN3372_c0_g1_i1	247	NC_001346.2 Maize streak virus - A[Ama]	2689	98.889	2435	2524	Positive	4.37e-40
	30																									TRINITY_DN3363_c0_g1_i2	374	NC_001346.2 Maize streak virus - A[Ama]	2689	96.825	1316	1191	Negative	6.69e-55
	30																									TRINITY_DN3401_c1_g1_i1	376	NC_001346.2 Maize streak virus - A[Ama]	2689	100	99	164	Positive	3.24e-28
	30																									TRINITY_DN3349_c0_g1_i1	221	NC_001346.2 Maize streak virus - A[Ama]	2689	98.198	338	228	Negative	3.81e-50
	30																									TRINITY_DN3349_c0_g1_i2	202	NC_001346.2 Maize streak virus - A[Ama]	2689	99.115	340	228	Negative	5.72e-53
	30																									TRINITY_DN3308_c1_g1_i1	268	NC_001346.2 Maize streak virus - A[Ama]	2689	100	2673	2645	Negative	8.33e-08
	30																									TRINITY_DN12020_c0_g1_i1	309	NC_001346.2 Maize streak virus - A[Ama]	2689	93.939	2172	2074	Negative	1.21e-36
	30																									TRINITY_DN12037_c0_g1_i1	256	NC_001346.2 Maize streak virus - A[Ama]	2689	98.305	1469	1411	Negative	7.76e-23
	30																									TRINITY_DN26078_c0_g1_i1	256	NC_001346.2 Maize streak virus - A[Ama]	2689	100	1133	1080	Negative	1e-21
	30																									TRINITY_DN26103_c0_g1_i1	231	NC_001346.2 Maize streak virus - A[Ama]	2689	100	1273	1301	Positive	7.08e-08
	30																									TRINITY_DN13391_c0_g1_i1	253	NC_001346.2 Maize streak virus - A[Ama]	2689	94.737	1354	1298	Negative	2.15e-18
	30																									TRINITY_DN25974_c0_g1_i1	283	NC_001346.2 Maize streak virus - A[Ama]	2689	98.701	630	706	Positive	8.54e-33
	30																									TRINITY_DN25560_c0_g1_i1	256	NC_001346.2 Maize streak virus - A[Ama]	2689	93.75	1604	1557	Negative	2.19e-13
	30																									TRINITY_DN8172_c0_g1_i1	479	NC_001346.2 Maize streak virus - A[Ama]	2689	98.611	1331	1402	Positive	8.97e-30
	30																									TRINITY_DN8123_c0_g1_i1	305	NC_001346.2 Maize streak virus - A[Ama]	2689	100	2484	2524	Positive	2.05e-14
	30																									TRINITY_DN8175_c0_g1_i1	282	NC_001346.2 Maize streak virus - A[Ama]	2689	97.26	1350	1278	Negative	6.62e-29
	30																									TRINITY_DN3807_c1_g1_i1	266	NC_001346.2 Maize streak virus - A[Ama]	2689	100	351	381	Positive	6.39e-09
	30																									TRINITY_DN3852_c0_g1_i3	1543	NC_001346.2 Maize streak virus - A[Ama]	2689	96.842	2524	2430	Negative	1.06e-38
	30																									TRINITY_DN24134_c0_g1_i1	273	NC_001346.2 Maize streak virus - A[Ama]	2689	98.276	1276	1333	Positive	2.99e-22
	30																									TRINITY_DN8854_c0_g1_i1	303	NC_001346.2 Maize streak virus - A[Ama]	2689	98.876	2436	2524	Positive	1.96e-39
	30																									TRINITY_DN16629_c0_g1_i1	236	NC_001346.2 Maize streak virus - A[Ama]	2689	98.077	1285	1336	Positive	5.53e-19
	30																									TRINITY_DN19197_c0_g1_i1	232	NC_001346.2 Maize streak virus - A[Ama]	2689	100	292	244	Negative	5.42e-19
	30																									TRINITY_DN14783_c0_g1_i1	280	NC_001346.2 Maize streak virus - A[Ama]	2689	93.258	2435	2523	Positive	1.41e-30
	30																									TRINITY_DN14737_c0_g1_i1	283	NC_001346.2 Maize streak virus - A[Ama]	2689	97.468	1354	1276	Negative	3.07e-32
	30																									TRINITY_DN2283_c0_g2_i1	297	NC_001346.2 Maize streak virus - A[Ama]	2689	97.872	2430	2523	Positive	1.48e-40
	30																									TRINITY_DN3743_c0_g1_i3	415	NC_001346.2 Maize streak virus - A[Ama]	2689	94.737	1347	1291	Negative	1.31e-17
	30																									TRINITY_DN30008_c0_g1_i1	259	NC_001346.2 Maize streak virus - A[Ama]	2689	98.039	1325	1275	Negative	2.2e-18
	30																									TRINITY_DN29990_c0_g1_i1	292	NC_001346.2 Maize streak virus - A[Ama]	2689	98.81	1532	1449	Negative	1.13e-36
	30																									TRINITY_DN30002_c0_g1_i2	258	NC_001346.2 Maize streak virus - A[Ama]	2689	97.101	1354	1286	Negative	1.01e-26
	30																									TRINITY_DN6947_c0_g1_i1	248	NC_001346.2 Maize streak virus - A[Ama]	2689	98.485	264	328	Positive	3.46e-26
	30																									TRINITY_DN6980_c0_g1_i1	236	NC_001346.2 Maize streak virus - A[Ama]	2689	97.5	1305	1344	Positive	2.59e-12
	30																									TRINITY_DN12726_c0_g1_i1	252	NC_001346.2 Maize streak virus - A[Ama]	2689	91.071	1261	1316	Positive	5.98e-14
	30																									TRINITY_DN2392_c0_g2_i1	299	NC_001346.2 Maize streak virus - A[Ama]	2689	93.75	2672	2593	Negative	3.28e-27
	30																									TRINITY_DN26916_c0_g1_i1	393	NC_001346.2 Maize streak virus - A[Ama]	2689	97.872	2523	2430	Negative	2e-40
	30																									TRINITY_DN2768_c0_g1_i1	246	NC_001346.2 Maize streak virus - A[Ama]	2689	97.297	1405	1332	Negative	1.59e-29
	30																									TRINITY_DN16311_c0_g1_i1	488	NC_001346.2 Maize streak virus - A[Ama]	2689	87.5	443	381	Negative	1.56e-12
	30																									TRINITY_DN15781_c0_g1_i1	269	NC_001346.2 Maize streak virus - A[Ama]	2689	98.734	2435	2513	Positive	6.24e-34
	30																									TRINITY_DN23348_c0_g1_i1	246	NC_001346.2 Maize streak virus - A[Ama]	2689	96.61	1293	1351	Positive	3.46e-21
	30																									TRINITY_DN23359_c0_g1_i1	294	NC_001346.2 Maize streak virus - A[Ama]	2689	97.183	1350	1280	Negative	8.96e-28
	30																									TRINITY_DN23339_c0_g1_i2	232	NC_001346.2 Maize streak virus - A[Ama]	2689	100	443	387	Negative	1.94e-23
	30																									TRINITY_DN19768_c0_g1_i1	214	NC_001346.2 Maize streak virus - A[Ama]	2689	100	1232	1274	Positive	1.07e-15
	30																									TRINITY_DN28154_c0_g1_i1	289	NC_001346.2 Maize streak virus - A[Ama]	2689	95.385	1352	1288	Negative	8.86e-23
	30																									TRINITY_DN20713_c0_g1_i1	355	NC_001346.2 Maize streak virus - A[Ama]	2689	94.286	1312	1346	Positive	4.06e-07
	30																									TRINITY_DN20753_c0_g1_i1	462	NC_001346.2 Maize streak virus - A[Ama]	2689	97.802	1766	1676	Negative	1.1e-38
	30																									TRINITY_DN8736_c0_g1_i1	219	NC_001346.2 Maize streak virus - A[Ama]	2689	100	1065	1093	Positive	6.67e-08
	30																									TRINITY_DN8753_c0_g1_i1	265	NC_001346.2 Maize streak virus - A[Ama]	2689	98.837	1323	1238	Negative	7.89e-38
	30																									TRINITY_DN3559_c0_g1_i1	307	NC_001346.2 Maize streak virus - A[Ama]	2689	98.246	1261	1317	Positive	1.22e-21
	30																									TRINITY_DN3534_c2_g1_i1	303	NC_001346.2 Maize streak virus - A[Ama]	2689	93.617	1045	1091	Positive	3.4e-12
	30																									TRINITY_DN4082_c0_g1_i2	494	NC_001346.2 Maize streak virus - A[Ama]	2689	98.462	1274	1338	Positive	7.22e-26
	30																									TRINITY_DN4099_c0_g1_i2	272	NC_001346.2 Maize streak virus - A[Ama]	2689	98.649	2436	2509	Positive	3.8e-31
	30																									TRINITY_DN2510_c0_g1_i1	206	NC_001346.2 Maize streak virus - A[Ama]	2689	90.722	901	806	Negative	3.62e-30
	30																									TRINITY_DN25478_c0_g1_i1	301	NC_001346.2 Maize streak virus - A[Ama]	2689	97.5	685	724	Positive	3.38e-12
	30																									TRINITY_DN22901_c0_g1_i1	369	NC_001346.2 Maize streak virus - A[Ama]	2689	97.753	1354	1266	Negative	1.13e-37
	30																									TRINITY_DN8547_c0_g1_i1	424	NC_001346.2 Maize streak virus - A[Ama]	2689	96.154	1296	1347	Positive	4.83e-17
	30																									TRINITY_DN895_c0_g1_i1	420	NC_001346.2 Maize streak virus - A[Ama]	2689	98.851	2437	2523	Positive	3.59e-38
	30																									TRINITY_DN850_c0_g1_i2	281	NC_001346.2 Maize streak virus - A[Ama]	2689	97.531	1258	1337	Positive	8.47e-33
	30																									TRINITY_DN26193_c0_g1_i1	283	NC_001346.2 Maize streak virus - A[Ama]	2689	97.368	706	669	Negative	4.08e-11
	30																									TRINITY_DN1828_c0_g1_i1	205	NC_001346.2 Maize streak virus - A[Ama]	2689	94.845	1319	1223	Negative	2.76e-36
	30																									TRINITY_DN1828_c0_g1_i2	314	NC_001346.2 Maize streak virus - A[Ama]	2689	98.765	1302	1223	Negative	2.05e-34
	30																									TRINITY_DN1837_c0_g1_i1	442	NC_001346.2 Maize streak virus - A[Ama]	2689	97.59	2512	2430	Negative	2.94e-34
	30																									TRINITY_DN4636_c4_g6_i1	229	NC_001346.2 Maize streak virus - A[Ama]	2689	96.154	1293	1421	Positive	3.93e-55
	30																									TRINITY_DN4703_c1_g2_i1	336	NC_001346.2 Maize streak virus - A[Ama]	2689	95.745	1343	1297	Negative	2.27e-14
	30																									TRINITY_DN4706_c0_g1_i1	338	NC_001346.2 Maize streak virus - A[Ama]	2689	94.161	1548	1413	Negative	7.77e-54
	30																									TRINITY_DN4647_c6_g3_i7	756	NC_001346.2 Maize streak virus - A[Ama]	2689	98.947	2434	2528	Positive	2.36e-42
	30																									TRINITY_DN4647_c6_g1_i3	468	NC_001346.2 Maize streak virus - A[Ama]	2689	100	1303	1228	Negative	1.12e-33
	30																									TRINITY_DN4639_c4_g1_i1	320	NC_001346.2 Maize streak virus - A[Ama]	2689	98.182	1551	1497	Negative	1.65e-20
	30																									TRINITY_DN4644_c0_g3_i2	496	NC_001346.2 Maize streak virus - A[Ama]	2689	100	495	382	Negative	8.98e-55
	30																									TRINITY_DN4620_c5_g1_i1	219	NC_001346.2 Maize streak virus - A[Ama]	2689	98.851	1314	1228	Negative	1.78e-38
	30																									TRINITY_DN4642_c1_g1_i1	296	NC_001346.2 Maize streak virus - A[Ama]	2689	96.923	1354	1290	Negative	1.95e-24
	30																									TRINITY_DN4654_c1_g2_i7	228	NC_001346.2 Maize streak virus - A[Ama]	2689	90	2478	2546	Positive	1.91e-18
	30																									TRINITY_DN4614_c7_g4_i16	2630	NC_001346.2 Maize streak virus - A[Ama]	2689	97.727	2435	2522	Positive	3.04e-36
	30																									TRINITY_DN4653_c15_g1_i1	291	NC_001346.2 Maize streak virus - A[Ama]	2689	97.561	2435	2516	Positive	2.45e-33
	30																									TRINITY_DN20949_c0_g1_i1	317	NC_001346.2 Maize streak virus - A[Ama]	2689	97.403	1274	1350	Positive	4.49e-31
	30																									TRINITY_DN9361_c0_g1_i1	279	NC_001346.2 Maize streak virus - A[Ama]	2689	97.561	2436	2517	Positive	2.34e-33
	30																									TRINITY_DN26494_c0_g1_i1	249	NC_001346.2 Maize streak virus - A[Ama]	2689	92.063	1256	1317	Positive	2.73e-17
	30																									TRINITY_DN26414_c0_g1_i1	310	NC_001346.2 Maize streak virus - A[Ama]	2689	100	391	519	Positive	2.51e-63
	30																									TRINITY_DN11276_c0_g1_i1	437	NC_001346.2 Maize streak virus - A[Ama]	2689	96.97	1285	1350	Positive	8.2e-25
	30																									TRINITY_DN16127_c0_g1_i1	402	NC_001346.2 Maize streak virus - A[Ama]	2689	98.824	1324	1240	Negative	4.44e-37
	30																									TRINITY_DN332_c1_g1_i1	288	NC_001346.2 Maize streak virus - A[Ama]	2689	92.105	2409	2484	Positive	6.82e-24
	30																									TRINITY_DN377_c0_g1_i1	260	NC_001346.2 Maize streak virus - A[Ama]	2689	95	1346	1307	Negative	1.34e-10
	30																									TRINITY_DN330_c0_g1_i1	272	NC_001346.2 Maize streak virus - A[Ama]	2689	100	444	404	Negative	1.81e-14
	30																									TRINITY_DN25863_c0_g1_i1	384	NC_001346.2 Maize streak virus - A[Ama]	2689	96.078	1301	1351	Positive	1.56e-16
	30																									TRINITY_DN12515_c0_g1_i1	391	NC_001346.2 Maize streak virus - A[Ama]	2689	98.529	1747	1680	Negative	1.22e-27
	30																									TRINITY_DN24659_c0_g1_i1	228	NC_001346.2 Maize streak virus - A[Ama]	2689	96.429	2433	2516	Positive	1.87e-33
	30																									TRINITY_DN24687_c0_g1_i1	279	NC_001346.2 Maize streak virus - A[Ama]	2689	96.97	2435	2500	Positive	5.09e-25
	30																									TRINITY_DN26512_c1_g1_i1	233	NC_001346.2 Maize streak virus - A[Ama]	2689	93.846	1289	1351	Positive	1.17e-20
	30																									TRINITY_DN4602_c1_g1_i4	600	NC_001346.2 Maize streak virus - A[Ama]	2689	98.78	2372	2291	Negative	3.13e-35
	30																									TRINITY_DN4599_c4_g4_i1	208	NC_001346.2 Maize streak virus - A[Ama]	2689	98.571	456	387	Negative	1.7e-28
	30																									TRINITY_DN4528_c4_g1_i1	202	NC_001346.2 Maize streak virus - A[Ama]	2689	96.296	1354	1301	Negative	1.67e-18
	30																									TRINITY_DN4607_c3_g1_i6	259	NC_001346.2 Maize streak virus - A[Ama]	2689	100	306	220	Negative	4.6e-40
	30																									TRINITY_DN4525_c1_g1_i8	458	NC_001346.2 Maize streak virus - A[Ama]	2689	98.837	677	592	Negative	1.41e-37
	30																									TRINITY_DN4508_c4_g4_i1	219	NC_001346.2 Maize streak virus - A[Ama]	2689	97.368	1942	1905	Negative	3.08e-11
	30																									TRINITY_DN4548_c8_g2_i17	421	NC_001346.2 Maize streak virus - A[Ama]	2689	98.649	1489	1562	Positive	6.07e-31
	30																									TRINITY_DN4524_c0_g1_i4	375	NC_001346.2 Maize streak virus - A[Ama]	2689	96.296	2435	2515	Positive	1.49e-31
	30																									TRINITY_DN4561_c0_g2_i2	714	NC_001346.2 Maize streak virus - A[Ama]	2689	100	1047	1102	Positive	2.29e-22
	30																									TRINITY_DN4530_c5_g1_i1	201	NC_001346.2 Maize streak virus - A[Ama]	2689	100	1064	1109	Positive	2.15e-17
	30																									TRINITY_DN4584_c3_g1_i10	289	NC_001346.2 Maize streak virus - A[Ama]	2689	95.098	1553	1453	Negative	1.86e-39
	30																									TRINITY_DN4563_c0_g1_i1	238	NC_001346.2 Maize streak virus - A[Ama]	2689	95.918	1553	1601	Positive	1.21e-15
	30																									TRINITY_DN4583_c3_g1_i1	260	NC_001346.2 Maize streak virus - A[Ama]	2689	98.333	1550	1491	Negative	2.19e-23
	30																									TRINITY_DN4583_c3_g1_i2	210	NC_001346.2 Maize streak virus - A[Ama]	2689	98.214	1550	1439	Negative	1e-50
	30																									TRINITY_DN4583_c3_g1_i3	219	NC_001346.2 Maize streak virus - A[Ama]	2689	93.913	1553	1439	Negative	6.35e-43
	30																									TRINITY_DN4537_c5_g1_i1	208	NC_001346.2 Maize streak virus - A[Ama]	2689	97.917	2430	2525	Positive	7.76e-42
	30																									TRINITY_DN4545_c4_g1_i11	212	NC_001346.2 Maize streak virus - A[Ama]	2689	94.937	1293	1370	Positive	1.74e-28
	30																									TRINITY_DN4519_c7_g7_i1	249	NC_001346.2 Maize streak virus - A[Ama]	2689	99.01	681	781	Positive	3.38e-46
	30																									TRINITY_DN4518_c4_g1_i13	299	NC_001346.2 Maize streak virus - A[Ama]	2689	97.647	690	774	Positive	1.51e-35
	30																									TRINITY_DN4567_c36_g1_i1	669	NC_001346.2 Maize streak virus - A[Ama]	2689	93.08	2689	2402	Negative	1.87e-117
	30																									TRINITY_DN4567_c36_g1_i2	230	NC_001346.2 Maize streak virus - A[Ama]	2689	100	970	1052	Positive	6.75e-38
	30																									TRINITY_DN4567_c36_g1_i3	1164	NC_001346.2 Maize streak virus - A[Ama]	2689	98.584	453	1582	Positive	0
	30																									TRINITY_DN4567_c36_g1_i4	1165	NC_001346.2 Maize streak virus - A[Ama]	2689	98.712	453	1617	Positive	0
	30																									TRINITY_DN4567_c36_g1_i5	996	NC_001346.2 Maize streak virus - A[Ama]	2689	98.488	453	1312	Positive	0
	30																									TRINITY_DN4567_c36_g1_i6	445	NC_001346.2 Maize streak virus - A[Ama]	2689	97.994	1269	1617	Positive	8.75e-174
	30																									TRINITY_DN4567_c36_g4_i1	320	NC_001346.2 Maize streak virus - A[Ama]	2689	96.491	1412	1468	Positive	5.95e-20
	30																									TRINITY_DN4567_c36_g1_i7	1528	NC_001346.2 Maize streak virus - A[Ama]	2689	96.08	2689	1593	Negative	0
	30																									TRINITY_DN4567_c36_g1_i9	1165	NC_001346.2 Maize streak virus - A[Ama]	2689	99.171	894	1617	Positive	0
	30																									TRINITY_DN4567_c36_g1_i10	202	NC_001346.2 Maize streak virus - A[Ama]	2689	92.913	399	276	Negative	2.68e-46
	30																									TRINITY_DN4567_c36_g1_i12	325	NC_001346.2 Maize streak virus - A[Ama]	2689	93.6	2525	2402	Negative	3.49e-47
	30																									TRINITY_DN4567_c36_g1_i13	825	NC_001346.2 Maize streak virus - A[Ama]	2689	99.371	477	1	Negative	0
	30																									TRINITY_DN4567_c36_g1_i14	665	NC_001346.2 Maize streak virus - A[Ama]	2689	98.915	1065	1617	Positive	0
	30																									TRINITY_DN468_c0_g1_i1	226	NC_001346.2 Maize streak virus - A[Ama]	2689	96.491	1298	1354	Positive	4.07e-20
	30																									TRINITY_DN23806_c0_g1_i1	279	NC_001346.2 Maize streak virus - A[Ama]	2689	100	391	418	Positive	3.13e-07
	30																									TRINITY_DN5420_c0_g1_i1	235	NC_001346.2 Maize streak virus - A[Ama]	2689	98.958	1238	1333	Positive	1.91e-43
	30																									TRINITY_DN17372_c0_g1_i1	314	NC_001346.2 Maize streak virus - A[Ama]	2689	100	882	812	Negative	4.44e-31
	30																									TRINITY_DN5613_c0_g1_i1	253	NC_001346.2 Maize streak virus - A[Ama]	2689	95.652	821	776	Negative	6.01e-14
	30																									TRINITY_DN2814_c0_g1_i1	544	NC_001346.2 Maize streak virus - A[Ama]	2689	97.015	1346	1280	Negative	2.87e-25
	30																									TRINITY_DN2866_c0_g1_i1	251	NC_001346.2 Maize streak virus - A[Ama]	2689	98.039	363	413	Positive	2.13e-18
	30																									TRINITY_DN2844_c0_g1_i1	228	NC_001346.2 Maize streak virus - A[Ama]	2689	92.958	1280	1350	Positive	6.83e-23
	30																									TRINITY_DN1622_c0_g2_i1	221	NC_001346.2 Maize streak virus - A[Ama]	2689	96.154	1299	1350	Positive	2.39e-17
	30																									TRINITY_DN13991_c0_g1_i1	649	NC_001346.2 Maize streak virus - A[Ama]	2689	98.387	1240	1301	Positive	4.46e-24
	30																									TRINITY_DN22674_c0_g1_i1	257	NC_001346.2 Maize streak virus - A[Ama]	2689	100	1045	984	Negative	3.6e-26
	30																									TRINITY_DN22657_c0_g1_i1	475	NC_001346.2 Maize streak virus - A[Ama]	2689	100	1303	1252	Negative	2.51e-20
	30																									TRINITY_DN22662_c0_g1_i1	231	NC_001346.2 Maize streak virus - A[Ama]	2689	98.413	311	373	Positive	4.14e-25
	30																									TRINITY_DN4144_c1_g1_i3	680	NC_001346.2 Maize streak virus - A[Ama]	2689	94.828	1353	1296	Negative	1.7e-18
	30																									TRINITY_DN286_c0_g1_i2	219	NC_001346.2 Maize streak virus - A[Ama]	2689	97.531	2437	2517	Positive	1.79e-33
	30																									TRINITY_DN268_c0_g1_i1	436	NC_001346.2 Maize streak virus - A[Ama]	2689	98.148	1273	1326	Positive	8.24e-20
	30																									TRINITY_DN30067_c0_g1_i1	313	NC_001346.2 Maize streak virus - A[Ama]	2689	98.485	2523	2458	Negative	1.24e-26
	30																									TRINITY_DN2461_c0_g1_i2	288	NC_001346.2 Maize streak virus - A[Ama]	2689	98.507	1267	1333	Positive	3.15e-27
	30																									TRINITY_DN9689_c0_g1_i1	401	NC_001346.2 Maize streak virus - A[Ama]	2689	94.667	1354	1280	Negative	1.61e-26
	30																									TRINITY_DN7028_c0_g1_i1	202	NC_001346.2 Maize streak virus - A[Ama]	2689	100	619	586	Negative	1.01e-10
	30																									TRINITY_DN28893_c0_g1_i1	270	NC_001346.2 Maize streak virus - A[Ama]	2689	100	1301	1250	Negative	1.38e-20
	30																									TRINITY_DN20255_c0_g1_i1	294	NC_001346.2 Maize streak virus - A[Ama]	2689	98.734	2446	2524	Positive	6.88e-34
	30																									TRINITY_DN11172_c0_g1_i1	272	NC_001346.2 Maize streak virus - A[Ama]	2689	98.462	382	318	Negative	3.83e-26
	30																									TRINITY_DN7484_c0_g1_i1	228	NC_001346.2 Maize streak virus - A[Ama]	2689	97.727	1354	1311	Negative	1.49e-14
	30																									TRINITY_DN21996_c0_g1_i1	281	NC_001346.2 Maize streak virus - A[Ama]	2689	98.182	1284	1338	Positive	1.44e-20
	30																									TRINITY_DN1331_c0_g1_i1	225	NC_001346.2 Maize streak virus - A[Ama]	2689	98.889	2436	2525	Positive	3.94e-40
	30																									TRINITY_DN17123_c0_g1_i1	277	NC_001346.2 Maize streak virus - A[Ama]	2689	97.222	1348	1277	Negative	2.33e-28
	30																									TRINITY_DN1046_c0_g1_i1	409	NC_001346.2 Maize streak virus - A[Ama]	2689	93.151	752	824	Positive	9.92e-24
	30																									TRINITY_DN1300_c0_g1_i1	222	NC_001346.2 Maize streak virus - A[Ama]	2689	100	1075	1113	Positive	1.87e-13
	30																									TRINITY_DN19010_c0_g1_i1	219	NC_001346.2 Maize streak virus - A[Ama]	2689	100	701	729	Positive	6.67e-08
	30																									TRINITY_DN19094_c0_g1_i1	255	NC_001346.2 Maize streak virus - A[Ama]	2689	98.611	1253	1324	Positive	4.59e-30
	30																									TRINITY_DN13478_c0_g1_i1	303	NC_001346.2 Maize streak virus - A[Ama]	2689	100	1065	1106	Positive	5.65e-15
	30																									TRINITY_DN15903_c0_g1_i1	300	NC_001346.2 Maize streak virus - A[Ama]	2689	98.98	1305	1402	Positive	1.93e-44
	30																									TRINITY_DN22438_c0_g1_i1	400	NC_001346.2 Maize streak virus - A[Ama]	2689	94.702	1557	1408	Negative	1.53e-61
	30																									TRINITY_DN12981_c0_g1_i1	250	NC_001346.2 Maize streak virus - A[Ama]	2689	98.361	1549	1489	Negative	5.85e-24
	30																									TRINITY_DN21626_c0_g1_i1	293	NC_001346.2 Maize streak virus - A[Ama]	2689	94.565	1318	1228	Negative	6.85e-34
	30																									TRINITY_DN4254_c0_g1_i1	202	NC_001346.2 Maize streak virus - A[Ama]	2689	97.959	1341	1245	Negative	2.09e-42
	30																									TRINITY_DN4270_c0_g2_i4	225	NC_001346.2 Maize streak virus - A[Ama]	2689	96.739	2435	2526	Positive	6.59e-38
	30																									TRINITY_DN4246_c2_g1_i1	252	NC_001346.2 Maize streak virus - A[Ama]	2689	100	415	444	Positive	2.17e-08
	30																									TRINITY_DN4246_c3_g1_i1	224	NC_001346.2 Maize streak virus - A[Ama]	2689	97.917	2360	2313	Negative	8.73e-17
	30																									TRINITY_DN4287_c0_g1_i1	571	NC_001346.2 Maize streak virus - A[Ama]	2689	98.611	2504	2433	Negative	1.08e-29
	30																									TRINITY_DN4295_c0_g1_i1	439	NC_001346.2 Maize streak virus - A[Ama]	2689	97.59	1238	1319	Positive	1.05e-33
	30																									TRINITY_DN10896_c0_g1_i1	315	NC_001346.2 Maize streak virus - A[Ama]	2689	97.778	1582	1493	Negative	2.65e-38
	30																									TRINITY_DN10289_c0_g1_i1	317	NC_001346.2 Maize streak virus - A[Ama]	2689	98.98	1335	1238	Negative	2.04e-44
	30																									TRINITY_DN27717_c0_g1_i1	305	NC_001346.2 Maize streak virus - A[Ama]	2689	97.015	2454	2520	Positive	1.56e-25
	30																									TRINITY_DN27721_c0_g1_i1	384	NC_001346.2 Maize streak virus - A[Ama]	2689	100	360	426	Positive	9.22e-29
	30																									TRINITY_DN21902_c0_g1_i1	234	NC_001346.2 Maize streak virus - A[Ama]	2689	90.667	2446	2520	Positive	1.18e-20
	30																									TRINITY_DN21849_c0_g1_i1	240	NC_001346.2 Maize streak virus - A[Ama]	2689	96.61	1353	1295	Negative	3.36e-21
	30																									TRINITY_DN6768_c0_g1_i1	265	NC_001346.2 Maize streak virus - A[Ama]	2689	100	383	431	Positive	6.27e-19
	30																									TRINITY_DN3409_c1_g1_i1	246	NC_001346.2 Maize streak virus - A[Ama]	2689	100	2643	2679	Positive	2.71e-12
	30																									TRINITY_DN3478_c0_g1_i1	330	NC_001346.2 Maize streak virus - A[Ama]	2689	96.203	1380	1302	Negative	1.69e-30
	30																									TRINITY_DN9104_c0_g1_i1	228	NC_001346.2 Maize streak virus - A[Ama]	2689	100	1820	1867	Positive	1.91e-18
	30																									TRINITY_DN29099_c0_g1_i1	285	NC_001346.2 Maize streak virus - A[Ama]	2689	98.551	1258	1326	Positive	2.41e-28
	30																									TRINITY_DN29083_c0_g1_i1	296	NC_001346.2 Maize streak virus - A[Ama]	2689	100	1251	1190	Negative	4.2e-26
	30																									TRINITY_DN4954_c0_g1_i1	320	NC_001346.2 Maize streak virus - A[Ama]	2689	97.917	1334	1287	Negative	1.29e-16
	30																									TRINITY_DN26662_c0_g1_i1	256	NC_001346.2 Maize streak virus - A[Ama]	2689	97.674	1308	1350	Positive	6.09e-14
	30																									TRINITY_DN26639_c0_g1_i1	299	NC_001346.2 Maize streak virus - A[Ama]	2689	98.182	442	388	Negative	1.54e-20
	30																									TRINITY_DN14984_c0_g1_i1	425	NC_001346.2 Maize streak virus - A[Ama]	2689	95.312	1411	1474	Positive	4.81e-22
	30																									TRINITY_DN1767_c1_g1_i1	222	NC_001346.2 Maize streak virus - A[Ama]	2689	97.222	1283	1354	Positive	1.83e-28
	30																									TRINITY_DN1768_c0_g1_i1	247	NC_001346.2 Maize streak virus - A[Ama]	2689	98.182	1328	1274	Negative	1.25e-20
	30																									TRINITY_DN23956_c0_g1_i1	275	NC_001346.2 Maize streak virus - A[Ama]	2689	93.151	2453	2524	Positive	2.33e-23
	30																									TRINITY_DN23912_c0_g1_i1	552	NC_001346.2 Maize streak virus - A[Ama]	2689	100	1303	1176	Negative	1.66e-62
	30																									TRINITY_DN24502_c0_g1_i1	245	NC_001346.2 Maize streak virus - A[Ama]	2689	100	1578	1612	Positive	3.49e-11
	30																									TRINITY_DN672_c1_g1_i1	276	NC_001346.2 Maize streak virus - A[Ama]	2689	96.491	1297	1353	Positive	5.07e-20
	30																									TRINITY_DN625_c0_g1_i1	233	NC_001346.2 Maize streak virus - A[Ama]	2689	100	1308	1337	Positive	1.99e-08
	30																									TRINITY_DN27670_c0_g1_i1	277	NC_001346.2 Maize streak virus - A[Ama]	2689	97.872	1315	1408	Positive	1.38e-40
	30																									TRINITY_DN27667_c0_g1_i1	300	NC_001346.2 Maize streak virus - A[Ama]	2689	100	2642	2679	Positive	9.35e-13
	30																									TRINITY_DN10958_c0_g1_i1	299	NC_001346.2 Maize streak virus - A[Ama]	2689	100	1886	1948	Positive	1.18e-26
	30																									TRINITY_DN10994_c0_g1_i1	206	NC_001346.2 Maize streak virus - A[Ama]	2689	100	405	376	Negative	1.73e-08
	30																									TRINITY_DN26731_c0_g1_i1	335	NC_001346.2 Maize streak virus - A[Ama]	2689	100	402	490	Positive	4.7e-41
	30																									TRINITY_DN24593_c0_g1_i1	293	NC_001346.2 Maize streak virus - A[Ama]	2689	96.296	1285	1338	Positive	9.05e-18
	30																									TRINITY_DN5181_c0_g1_i1	381	NC_001346.2 Maize streak virus - A[Ama]	2689	98.214	1284	1339	Positive	5.54e-21
	30																									TRINITY_DN24802_c0_g1_i1	271	NC_001346.2 Maize streak virus - A[Ama]	2689	90.541	1275	1348	Positive	3.84e-21
	30																									TRINITY_DN25103_c0_g1_i1	291	NC_001346.2 Maize streak virus - A[Ama]	2689	97.959	1353	1305	Negative	3.23e-17
	30																									TRINITY_DN17883_c0_g2_i1	245	NC_001346.2 Maize streak virus - A[Ama]	2689	95.556	1299	1343	Positive	2.09e-13
	30																									TRINITY_DN24816_c0_g1_i1	368	NC_001346.2 Maize streak virus - A[Ama]	2689	98.81	1233	1316	Positive	1.45e-36
	30																									TRINITY_DN25296_c0_g1_i1	250	NC_001346.2 Maize streak virus - A[Ama]	2689	98.889	1620	1531	Negative	4.42e-40
[truncated: 1,819 more rows]
[truncated: 38 more columns]

## Sheet: Sheet14
Maize RNA sequencing analysis
Sample	Unique_Contigs
Sample	Unique_Contigs
[truncated: 2,947 more rows]

[truncated: 12 more sheets: Sheet2, Run3, Sheet1, Sheet3, Total_Virus_names, Sheet8, Sheet11, Sheet9, Sheet10, Sheet15, Sheet5, Sheet7]
