# Supplementary material for: Metagenomic analysis of viruses associated with maize lethal necrosis in Kenya
Source: Virol J. 2018 May 23;15:90. doi: 10.1186/s12985-018-0999-2 (PMC5966901; doi:10.1186/s12985-018-0999-2)
Supplement: Supplementary file 7 — Figure S3. Partial nucleotide sequence alignment of Kenya samples in group 1, 2 and 3 relative to the Ohio isolate of SCMV (JX188385.1). The coat protein detected in the original description of maize lethal necrosis in Kenya was used for comparison (JX286708.1) [6]. Alignment was generate using MAFFT. NIb and coat protein coding sequences are color coded blue and red, respectively. Coordinates are based on the Ohio isolate (JX188385.1). In group 1 no nucleotide insertions or deletions were observed. Nucleotide substitutions resulted in amino acid substitutions. Group two, had a 39 nt deletion (8487 to 8525) that resulted in an in-frame deletion of 13 amino acids. Group 3, had low similarity and a 45 nt deletion between nt 8487 to 8676 that resulted in a 15-amino acid deletion. (PDF 256 kb) [file 12985_2018_999_MOESM7_ESM.pdf]

|                    |      |                                                                                                                                                        |      |
|--------------------|------|--------------------------------------------------------------------------------------------------------------------------------------------------------|------|
| Ohio               | 8397 | <b>CAGTCGCGGAAGCTGTTGATGCAGGTACACAAGGAGGCAGTGGGAAGCCAAGGAACAACACCA</b>                                                                                 | 8456 |
| Kenya group 1      |      | CAATCGGGAACAGTTGATGCAGGTGCACAAGGCGGCAGCGGAAGCCAAGGAACAACACCA                                                                                           |      |
| Kenya group 2      |      | CAATCGGGAACAGTTGATGCAGGCGCACAAAGAGGCGGCGGAAATCAAGGAACAACACCG                                                                                           |      |
| Kenya group 3      |      | CAATCTGGTCAAGTTGACGCAGGGAGACAGGGCGGTAGCGGTGCTCAAGGAGGCACGCCA                                                                                           |      |
| JX286708.1 (Kenya) |      | ---TCTGGTCAAGTTGACGCAGGGAGACAGGGCGGTAGCGGCGCTCAAGGAGGCACACCG<br>** **        *****        *** ** *        *        *****        ** **                  |      |
| Ohio               | 8457 | <b>CCAGCAACAGGCAGTGGAGCAAAACCAGCCACCTCAGGGGCAGGATCTGGTAGTAGCACA</b>                                                                                    | 8516 |
| Kenya group 1      |      | CCAGCAACAGGTAGCGGATCGAAACCAGCGCTTCAGGAGCAGGATCTGGTAGCGGAACA                                                                                            |      |
| Kenya group 2      |      | CCAGCAACAGGTAACCGAACAGG-----                                                                                                                           |      |
| Kenya group 3      |      | CCAGCAGGAAGTGGAGGCACTGGATCTGGCACTCAAGGCAATGGGGGTCAGA-----                                                                                              |      |
| JX286708.1 (Kenya) |      | CCAGCAGGAAGTGGAGGCACTGGATCTGGCACTCAAGGCAATGGGGGTCAGA-----<br>*****    *        ** *                                                                    |      |
|                    |      | <b>Nib</b> <b>Coat protein</b>                                                                                                                         |      |
| Ohio               | 8517 | <b>GGAGCTGGAAGTGGTGTAACTGGAAGTCAAGCAGGGGCTGGCGGTAGCGCTGGGACGCGGA</b>                                                                                   | 8576 |
| Kenya group 1      |      | GGGACTGGAACCGGTGCAACTGGAGGCCAAACAGGAAATGGTAGTGGTGCTGGAACAGGA                                                                                           |      |
| Kenya group 2      |      | --AACCAGAACTGGTGCAACTGGAGGCCAAACAGGAGTTGGTGGTGGAACTACAACAGGA                                                                                           |      |
| Kenya group 3      |      | ----CGGGATCCCAAGGAAGTAGTGGTCAAC-----AAGGG                                                                                                              |      |
| JX286708.1 (Kenya) |      | ----CGGGATCCCAAGGAAGTGGCGGTCAAC-----AAGGG<br>*    ** *        *    ** *    *    ***                                      **                            |      |
| Ohio               | 8577 | <b>TCCGGAGCAACCGGAGGCCAAYCAGGATCTGGAAGTGGCACTGGACAGATTAACACGGGT</b>                                                                                    | 8636 |
| Kenya group 1      |      | TCTGGAGCGACCGGAGGCCAATCAGGATCTGGAAGTGGCACTGGACAGACTGGCACAGGC                                                                                           |      |
| Kenya group 2      |      | TCTGGAGCGACCGGAGGTCTAGACAGGATCTGGAAATGGTGTGTCACAGACCAACACGAGC                                                                                          |      |
| Kenya group 3      |      | TCCGGTGGGGGCACTGGTCAAGGAGCAGCTGGAAACAA-----CGGCGGAGGTCAG                                                                                               |      |
| JX286708.1 (Kenya) |      | TCCGGTGGGGGCACTGGTCAAGGAGCAGCTGGAAACAA-----CGGCGGAGGTCAG<br>** ** *        *        ** **        ** *        *****                                     |      |
| Ohio               | 8637 | <b>TCAGCAGGAACTAGTGCAACAGGAGGCCAAGAGATAGGGATGTGGATGCAGGTACAACA</b>                                                                                     | 8696 |
| Kenya group 1      |      | TCAGCAGGAACTGGTTCAACGGGAGGCCAGAGAGATAAGGATGTGGATGCAGGTACAACA                                                                                           |      |
| Kenya group 2      |      | TCAGCAGGAACTGGTGCAACGGGAGGCCAGAGAGATAAGGATGTAGATGCAGGTACAACA                                                                                           |      |
| Kenya group 3      |      | ACAGGAGGCTCTAGTGGGACATCTGGTCAGAGAGATAAGGACGTTGACGCAGGCTCGGCT                                                                                           |      |
| JX286708.1 (Kenya) |      | ACAGGAGGCTCTAGTGGGACAGCTGGTCAGAGAGATAAGGACGTTGACGCAGGCTCGGCT<br>*** **        ** **        **        ** **        *****        ** **        *        * |      |
